# Supplementary material for: Identification of protein features encoded by alternative exons using Exon Ontology
Source: PubMed Central journal article supplement (PMC5453322; doi:10.1101/gr.212696.116), 2017-06

## Exon Ontology: Functional Genomics At Exon Level Resolution

### Supplemental Figure S1

RT-PCR analysis of the 81 selected exons that are differentially spliced when comparing mesenchymal- and epithelial-like cells, using total RNAs from 4 normal mesenchymal cell types (Fibro), 4 normal epithelial cell types (Epi), 4 breast cancer mesenchymal-like cell types (Claudin low), and 4 breast cancer epithelial-like cell types (Luminal).

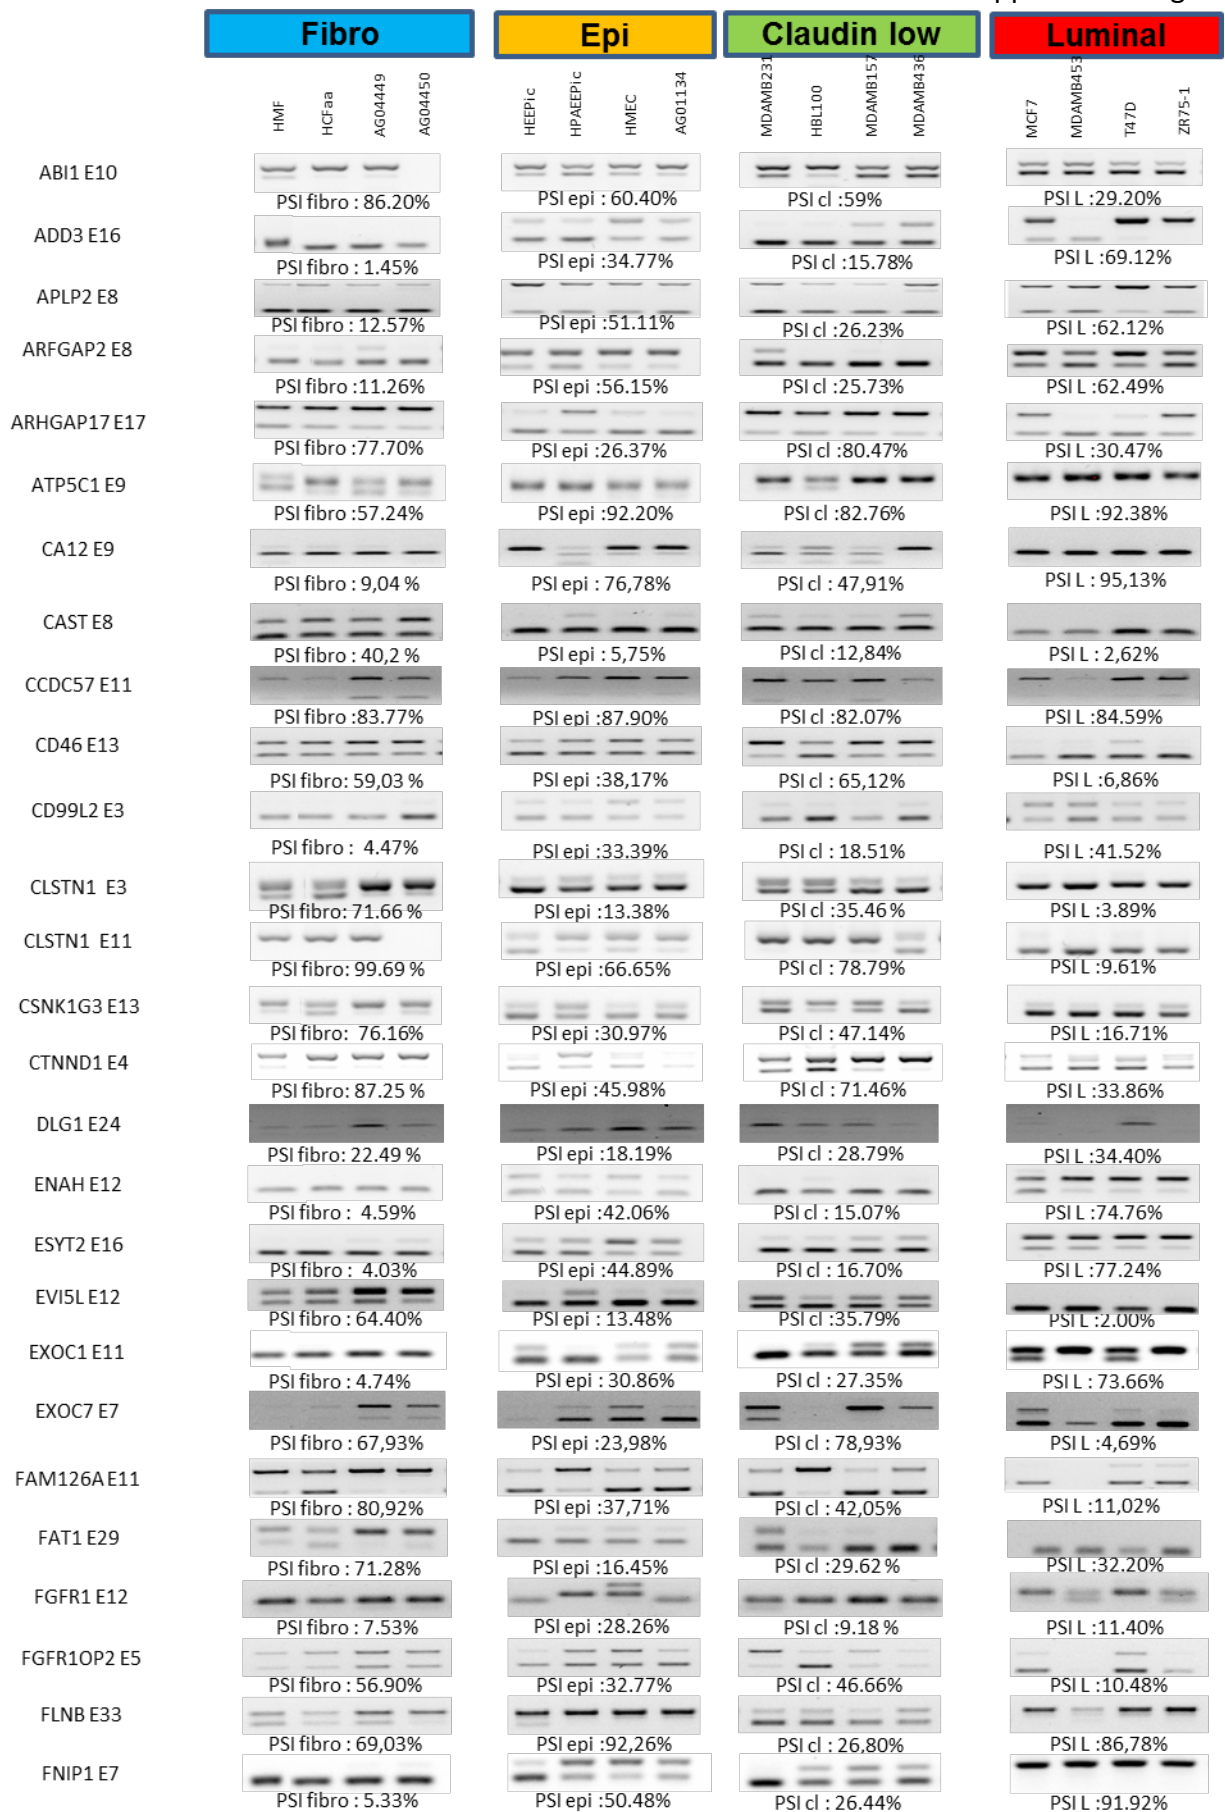

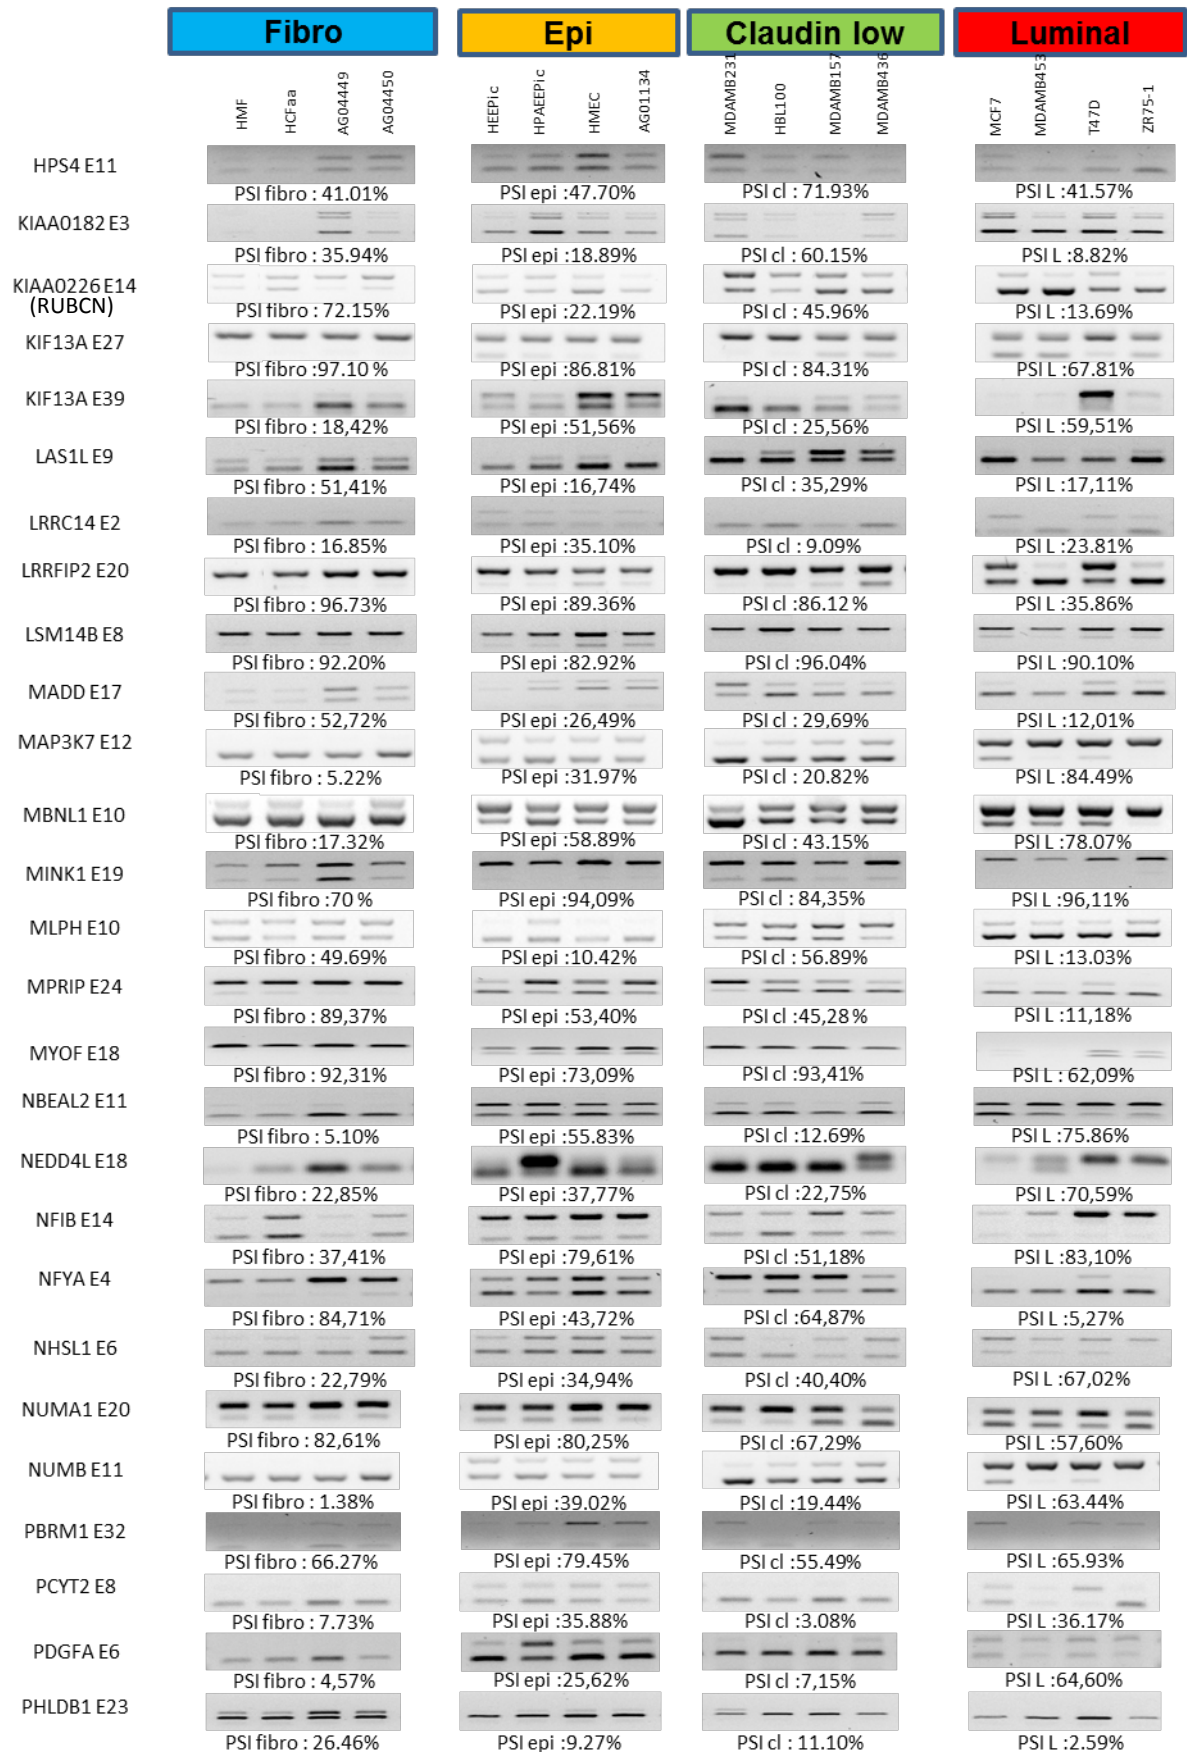

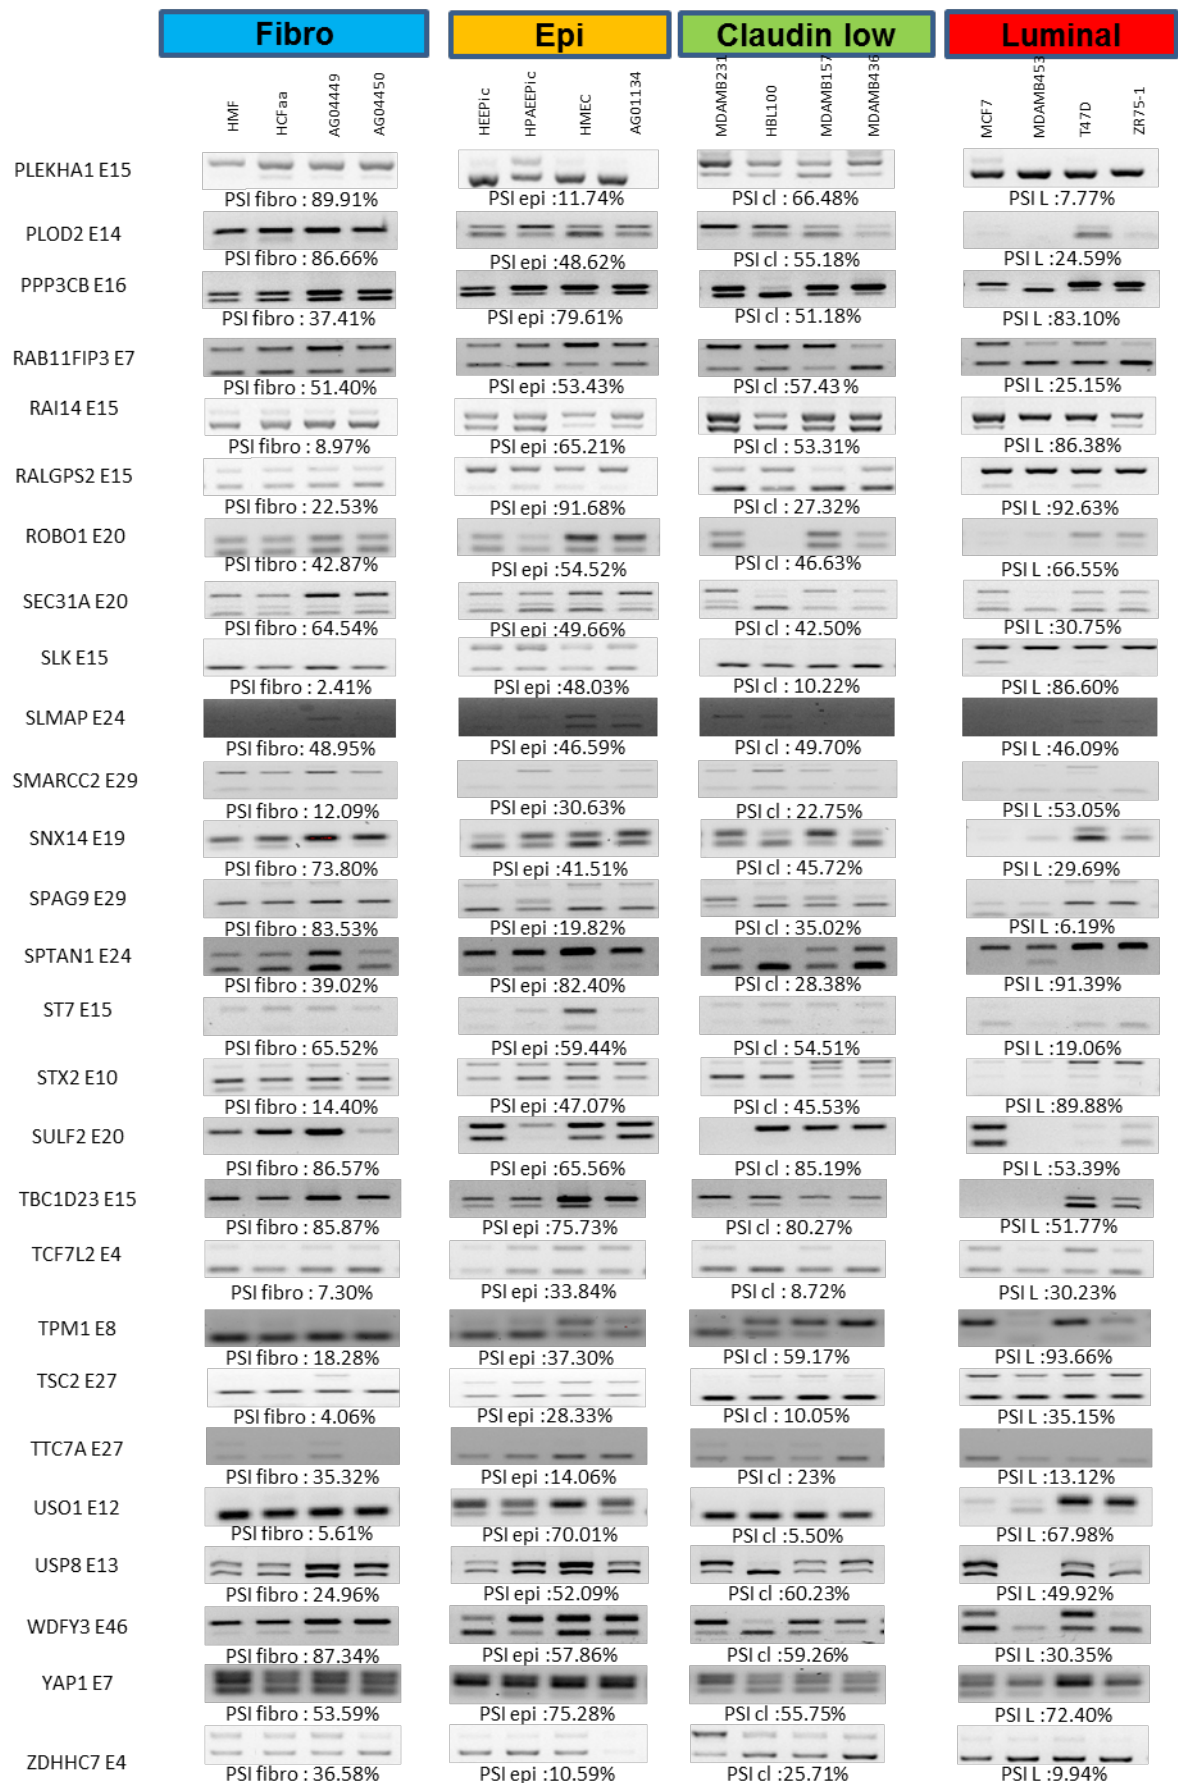

Supplement: supp_gr.212696.116_Supplemental_Fig_S1.pdf [file supp_gr.212696.116_Supplemental_Fig_S1.pdf]
