# Supplementary material for: Identification of protein features encoded by alternative exons using Exon Ontology
Source: PubMed Central journal article supplement (PMC5453322; doi:10.1101/gr.212696.116), 2017-06

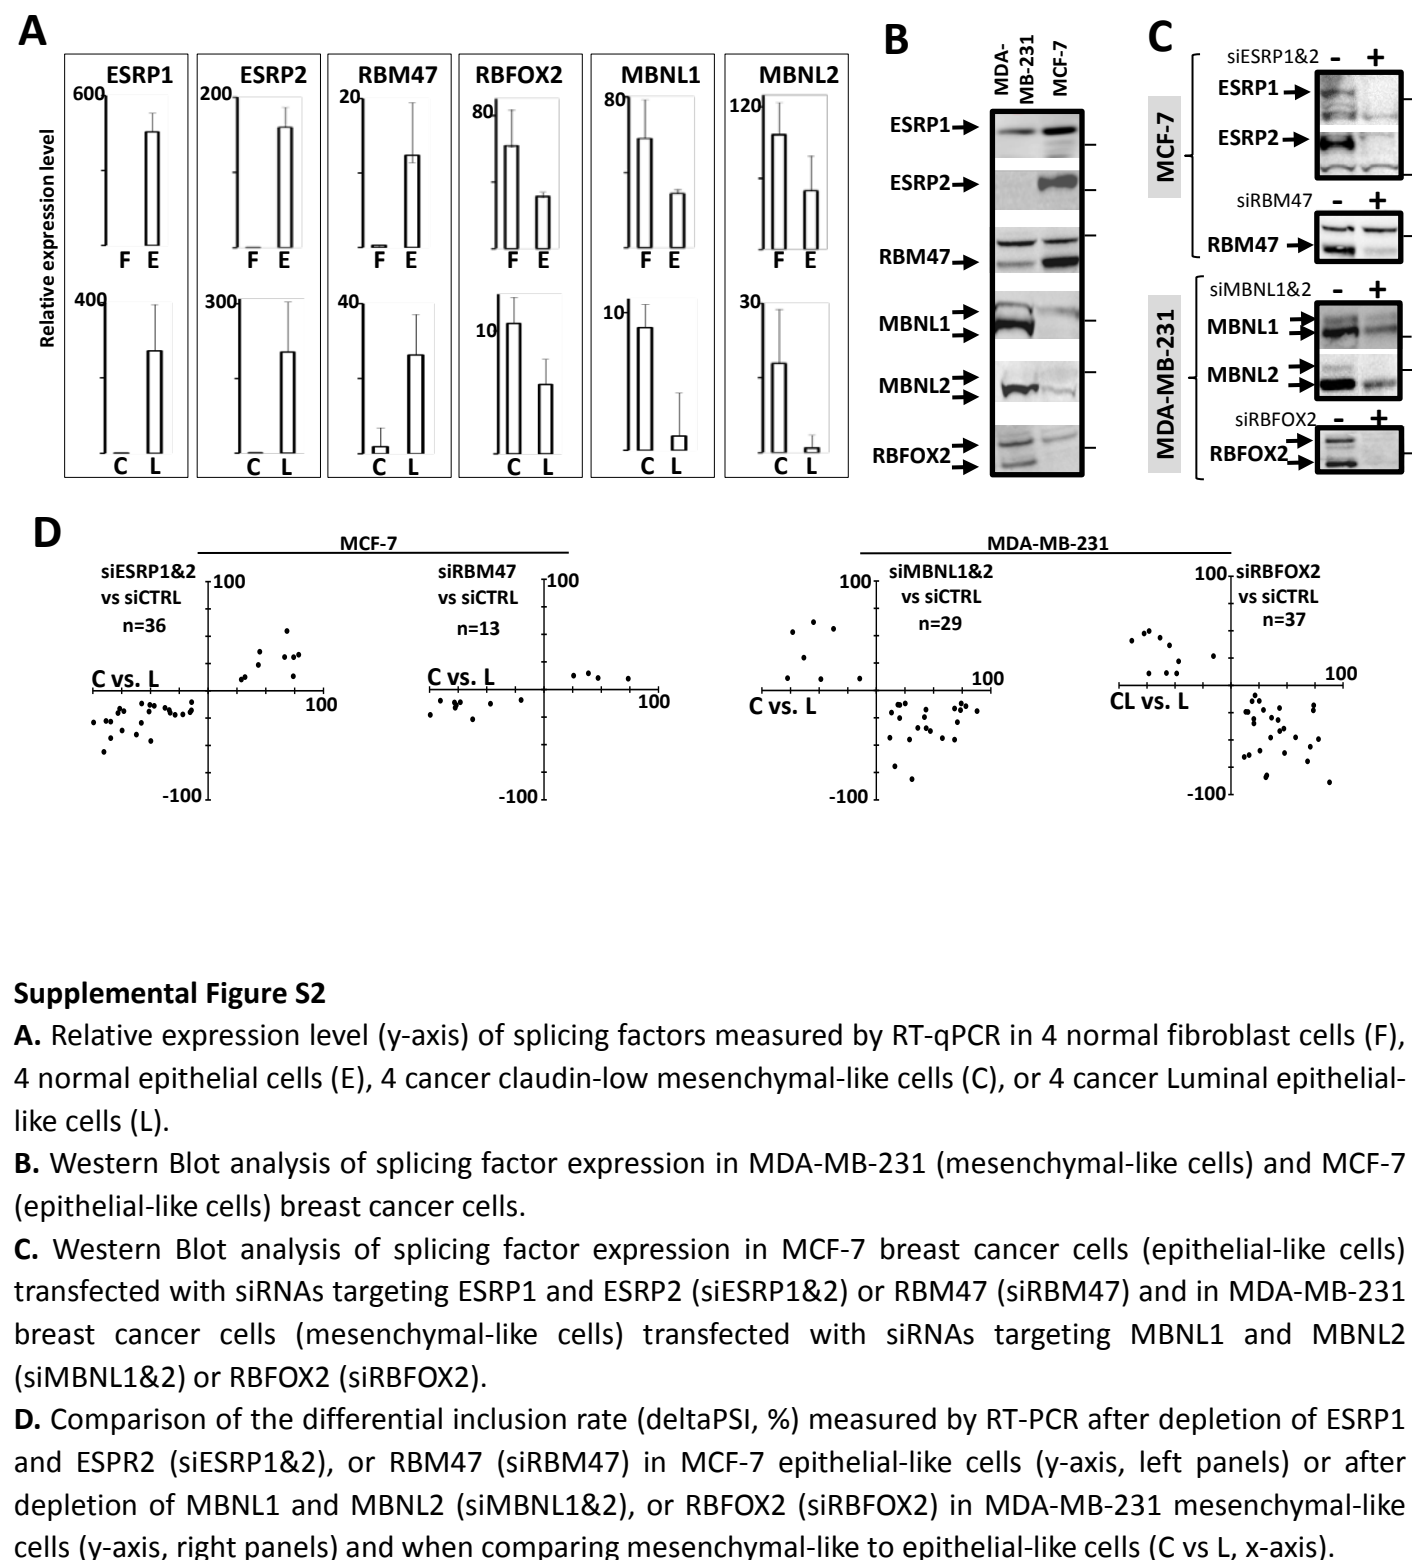

Supplement: supp_gr.212696.116_Supplemental_Fig_S2.pdf [file supp_gr.212696.116_Supplemental_Fig_S2.pdf]
