# Supplementary material for: Identification of protein features encoded by alternative exons using Exon Ontology
Source: PubMed Central journal article supplement (PMC5453322; doi:10.1101/gr.212696.116), 2017-06

## Exon Ontology: Functional Genomics At Exon Level Resolution

### Supplemental Figure S4

- A. “Faster DB protein” screenshot corresponding to the *SLK* gene illustrating the prediction of a Nuclear Localization Signal in exon 14.
- B. “Faster DB protein” screenshot corresponding to the *RAI14* gene illustrating the prediction of a Nuclear Localization Signal in exon 15 co-occurring with experimentally validated phospho-serine and phospho-threonine sites.
- C. “Faster DB protein” screenshot corresponding to the *TSC2* gene illustrating the prediction of an Intrinsically Unstructured Polypeptide Region in exon 27 co-occurring with experimentally validated phosphoserine sites.

A

← FasterDB identifier: 15979 - SLK (KIAA0204, se20-9, STK2) STE20-like kinase →

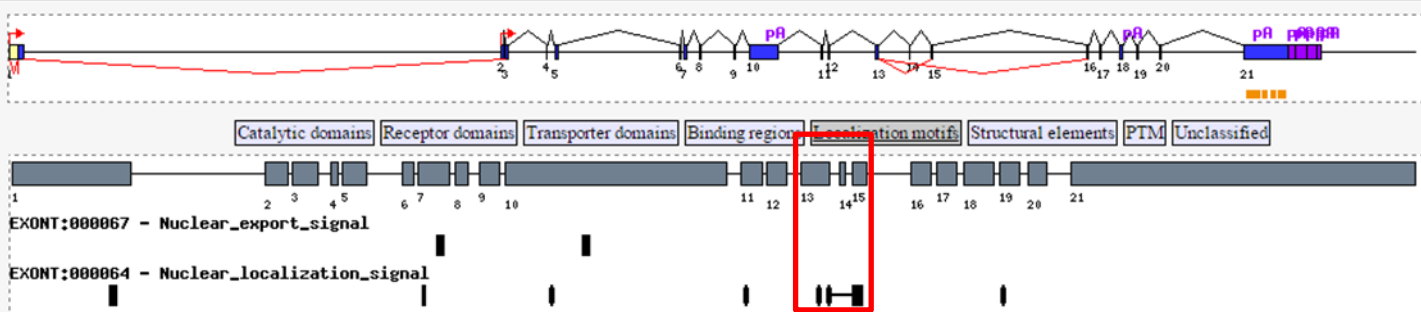

B

← FasterDB identifier: 12504 - RAI14 (DKFZp564G013, KIAA1334, NORPEG, RAI13) retinoic acid induced 14 →

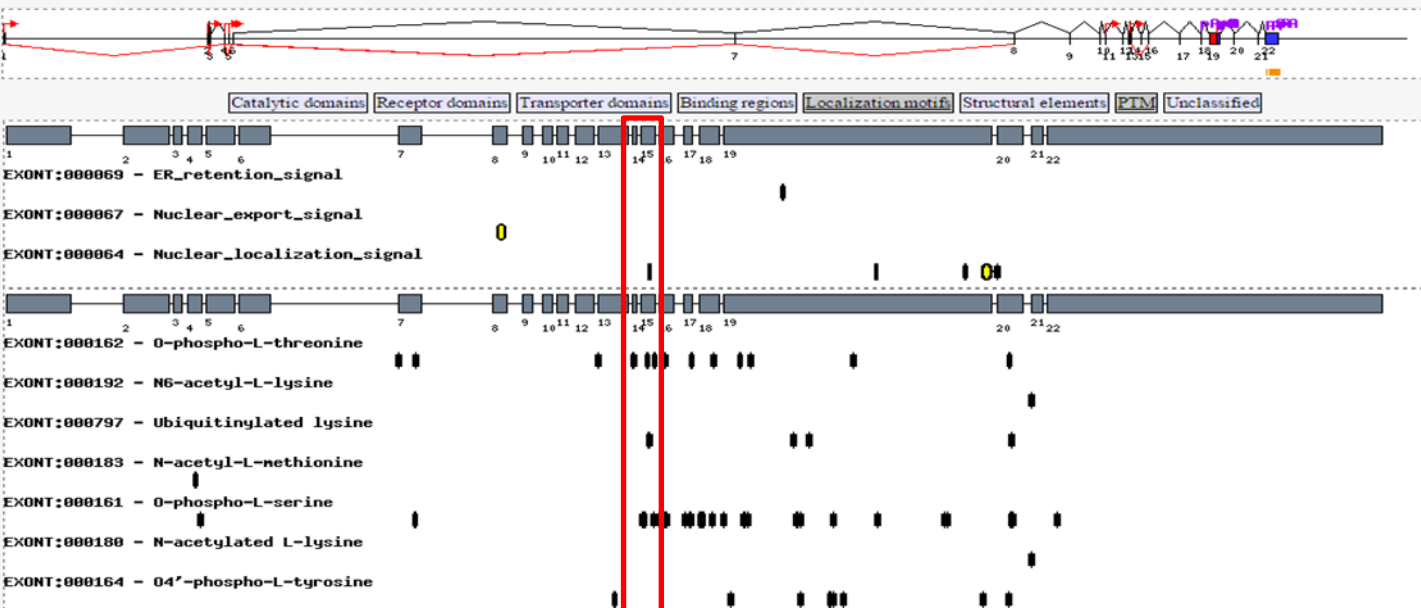

C

← FasterDB identifier: 5008 - TSC2 (LAM, TSC4, tuberin) tuberous sclerosis 2 →

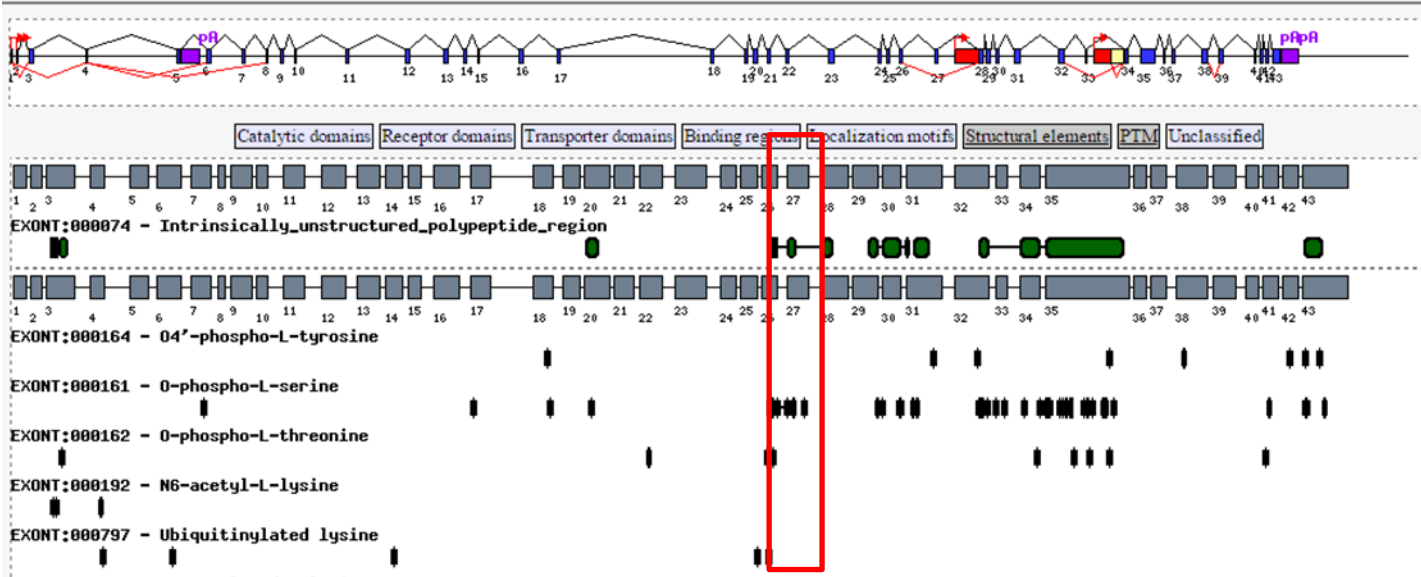

Supplement: supp_gr.212696.116_Supplemental_Fig_S4.pdf [file supp_gr.212696.116_Supplemental_Fig_S4.pdf]
