# Supplementary material for: Identification of protein features encoded by alternative exons using Exon Ontology
Source: Genome Res. 2017 Jun;27(6):1087–97. doi: 10.1101/gr.212696.116 (PMC5453322; doi:10.1101/gr.212696.116)
Supplement: Supplemental Material [file supp_gr.212696.116_Supplemental_Table_S1.xlsx]

## Sheet: Summary
Supplemental Table S1: Datasets and reagents
Sheet 1: Large-scale datasets
Sheet 2: Primers
Sheet 3: siRNAs and TOSS
Sheet 4: Antibodies

## Sheet: Datasets
Array datasets
ENCODE
human cell lines (fibroblastic, endothelial and epithelial)	GSE19090	GSE15805
Breast cancer cell lines
luminal and Claudin Low	GSE16732
Cell types from Array datasets
Epithelial cells
HAEpiC
HCPEpiC
HEEpiC
HIPEpiC
HMEC
HNPCEpiC
HRCEpiC
HRPEpiC
HRE
NHBE
PrEC
SAEC
Fibroblasts
AG04449
AG04450
AG09319
AoAF
BJ
Fibrobl
HCF
HCFaa
HFF
HGF
HMF
HPAF
HPdLF
HPF
HVMF
NHDF-Ad
NHDF-neo
NHLF
Breast cancer cell lines
Claudin Low
BT549
Hs578T
MDAMB157
MDAMB231
MDAMB436
SUM1315
SUM159
Luminal
BT474
BT483
CAMA1
MCF7
MDAMB134VI
MDAMB175VIII
MDAMB361
MDAMB415
MPE600
OCUBF
SKBR5
SUM185
SUM44
SUM52
T47D
UACC812
ZR751
ZR7530
RNA-seq datasets
ENCODE
human cell lines (fibroblastic, endothelial and epithelial)	GSE30567
Breast cancer cell lines
luminal and Claudin Low	GSE48213	GSE48216
Cell types from RNAseq datasets
Fibroblastic
IMR90
AG04450
BJ
HAoAF
HVMF
NHDF
NHLF
Epithelial
HMEC
HMEpC
HPIEpC
Breast cancer cell lines
Claudin-Low	When underlined : data from GSE48216
BT549
HCC1395
HCC38
HS578T
MDAMB231
SUM1315MO2
SUM159PT
Luminal
AU565
BT474
EFM192A
EFM192B
EFM192C
HCC1419
HCC202
MDAMB361
SKBR3
SUM225CWN
UACC812
UACC893
ZR7530
HCC2218
600MPE
BT483
CAMA1
HCC1428
LY2
MCF7
MDAMB134VI
MDAMB175VII
SUM52PE
T47D
T47D_KBluc
ZR751
ZR75B

## Sheet: Primers
Primers for PCR					PCR product size
gene symbol	ASE (exon number)	regulation	Forward	Reverse	Skipping	Inclusion
ABI1	10	up	CAATGACCAGGCAGATATC	GCGGTGGAGTTGGACTATCA	165	252
ADD3	16	down	TCATCTCACAGAAGGAGAAC	CCATTTACTACCATGACAGG	132	228
APLP2	8	down	CTGAAGCAGATCTGGAAGAC	GAAGCGAGCATGCTCATTATC	278	446
ARFGAP2	8	down	CCAACACAGACCTGCTTGG	CTTAGCTGCTGCTGGCTTC	89	131
ARHGAP17	17	up	TAGCATGGCGGTGATGGAAG	GGCTGATTTTGGCCAGATGC	129	363
ATP5C1	9	down	GCCAAGCTGTCATCAAAAA	GGACAAAGGCAGCAGTAAGC	113	150
CA12	9	down	AGGTCCAGAAGTTCGATGAG	CAGATGCCAAGAATGCCAGC	91	124
CAST	8	up	ACCAGCAAGTCTTCCAGTATG	GACTGTGACTTCTTCTCAGG	84	140
CCDC57	11	down	ACCTTCAGATTCAGACGCTG	TGCTCTGTCTCCTGCAGCTTG	108	271
CD46	13	up	GCAGTAATTTGTGTTGTCCCG	GGAGTGGTTGATTTAGTCTGG	107	200
CD99L2	3	down	CTGGAGGATGCAGTGAAAG	GAGCTCTGGTGGTTCCTG	94	238
CLSTN1	11	up	CTCTGTGACTGAGGATTACC	CAGTCGATCACCTTCTTATCC	168	225
CLSTN1	3	up	GTCACAGAGAACGACAACAC	GAATGACTCCCTCACCAGTG	166	195
CSNK1G3	13	up	GTTCAAATGCACCCATCACA	CCCCAGGATCTGTCTGTGTC	135	159
CTNND1	4	up	CTGCCCTGCTGGATTTGTC	GAAGGTGAATCACAGAGGAAG	143	262
DLG1	24	down	CCCCTTCTACAAGAACAAGG	CACTATCGCTGGCATTAGAAG	81	117
ENAH	12	down	CAGAGCCTGTAACTTCTAAGG	CTTCCGTCTGGACTCCATTG	162	225
ESYT2	16	down	CTGACAAAGACCAAGCCAAC	CCAACTGACATCTGGACAAC	130	193
EVI5L	12	up	AGAACCGGCTCCTGAAACAG	GATGGTGCTCTGTGCCTTCT	161	194
EXOC1	11	down	GACTGGCACAACTAAAGAAAGCA	TCCAACAGGGAAGATGACTGAGA	138	183
EXOC7	7	up	ACGTCTACTACCAGATACGC	TCGGAAATCATGCTCGTGAC	179	272
FAM126A	11	up	CCTCATGGTCCCATGAAATC	GTTTGATAAACCCGACTGGC	240	536
FAT1	29	up	TGTCTGAAGTGCAGTCCC	ACGCTTGGCATCCAATCTG	91	187
FGFR1	12	down	AAGCACATCGAGGTGAATGG	AAGTGAAGCACCTCCATCTC	113	264
FGFR1OP2	5	up	AAGAACATCAGTCGGCCTTG	GCTTTCCTCATTACTGCTGC	181	285
FLNB	33	down	GACATCTTCTACACAGCTGC	TGTCACTCACTGGGACATAG	127	266
FNIP1	7	down	GCTCATGCTCAGCAAAGTG	GTCCTCATTGAGCTCTCTTC	202	286
HPS4	11	up	GATGCCCCGCAGGAACATG	GGAACTCGTGGAGACTAATG	181	96
KIAA0182	3	up	AGCATGTATCAGCCGAGGTG	GGTTTTGGTTGGAGCGATGG	212	432
RUBCN	14	up	CTCACGTGATTCGGCACAG	GCTGCATCCCCTCAAACTG	206	281
KIF13A	27	up	CTGCCAGGTCCACCAAACTC	GAGTGCATCTGACCACCTC	89	128
KIF13A	39	down	GAGACTCCTCATGCCTTAAC	GAGTCTGCATCCTTCGTCTG	455	560
LAS1L	9	up	TGAACAGTTGGCAGCTTTGC	AGTTCAGAGAGCATCCTCTC	159	210
LRRC14	2	down	TGGCTGCGGTTGCGGGAC	AAGCCACACACAAGTGGTAG	58	125
LRRFIP2	20	up	GGGACACCAGCAGCTTAAT	CATCTGTTCCTCCTGCTCTT	185	257
LSM14B	8	up	CTGCTGACAACCTGAATGCT	CCTTAACGTTAGTTGGACGG	159	237
MADD	17	up	TTTCAAACCTCACACTGCCC	TAGAATTGCTGGATCGACCC	168	228
MAP3K7	12	down	ACGTTTAAGCTTGGGAGCCT	CTTGGATGGATCTACGTCTTGG	152	233
MBNL1	10	down	CCTGCACATTTGCAAGCCAAG	CATGTTGGCTAGAGCCTGTTG	210	264
MINK1	19	down	CACTGCCCTTAACACCAGTG	TTCCGCTCCAGTGAGCCAG	162	173
MLPH	10	up	AGTACTTGGCCGATGTGGAC	CTCAGGGCCTCCTCCTCTAC	157	241
MPRIP	24	up	GCAACCCTGACTTCTTGAAG	AGCTTCAACCGTTCTTGCAC	109	172
MYOF	18	up	AAAATTGCTGCCTCTGGTGG	GTTGGAACAAAGCCTACCTC	68	107
NBEAL2	11	down	ACTCGGCTCATTCAGAACAG	GACTACATGGACTGCAATGG	66	147
NEDD4L	18	down	TCAAGGTTGAGGTCATGCAG	TCGAGTCCAAGTTGTGGTTC	180	240
NFIB	14	down	TCGATATGTGGGACTAAGCC	ACATTGGCCGGTAAGATGGG	121	210
NFYA	4	up	GGACCATGGAGCAGTATACA	GGCCAGTTGATGTGATTAGC	141	228
NHSL1	6	down	TGCCAACACCAGAAGAGAAG	CGACAGCTATTGAACCTTCC	163	295
NUMA1	20	up	GGTGATGACTGCCAAGTATG	TTGCTGGCTTGGTCAGAGTC	138	180
NUMB	11	down	CTTCAGCACACCTGAGGAC	GAGATGGCAGTGGGTGGAG	273	417
PBRM1	32	down	ACCAATGGGGATGCTCAATC	CACTCCTTGGTTCATCACAC	61	217
PCYT2	8	down	TGAGTACCGGGAGTATGCAG	TGAGATGTCTGCAGGAACTG	90	144
PDGFA	6	down	GAGGTTAGAGGAGCATTTGG	GTAACACGCCATGTACATCC	134	203
PHLDB1	23	up	TCTACTCACCCAGAATGGCAC	GATAGAGTGGTGCATGAGAG	250	290
PLEKHA1	15	up	GGATTAAAGCAGTCTCTGGC	CCATGGTAAAGGTTGAGACC	180	325
PLOD2	14	up	CTGGATCCTGATATGGCTCT	GCAGTGGATAATAGCCTTCC	98	166
PPP3CB	16	down	CGAGCAATTGGCAAGATGGC	TCCAAACCCTTTGCCTCTTC	200	230
RAB11FIP3	7	up	TTTGAGGACTACGGTGAAGG	CTTGCCACCTTCTTGCTGGA	134	269
RAI14	15	down	GGATCATGGAGCAGATGTC	CGTATAGAACTGATCTCAGC	357	444
RALGPS2	15	down	GCAGCGATGGTTCTGAACTAAG	CCTGAGAACACCTTGAATAGT	122	200
ROBO1	20	down	CCTCATGGTCTTCAGCATCTG	TTCGCCTCCTCTCTGGTAAG	105	132
SEC31A	20	up	CTTTGAGGATGATTCTCGTGG	AATGTTCCTCCAGATGAGGG	126	243
SLK	15	down	GCCAAACGCATCAAAGGAGAAC	TAGCTAACTCTGCCTTCTGCTG	160	253
SLMAP	24	up	GACACAGACTGTACTCTCAG	TACAGCACGATGGCTGTTAC	189	279
SMARCC2	29	down	AACTCCTCCCTCAATGATGC	TTCCTGGAACCGTGATGTCC	192	258
SNX14	19	up	AGGTGCAGAATCACCAACAC	ACATAGCTCCCTCCATTGTG	134	161
SPAG9	29	up	TGTAATCGTTTGTGGGTGGG	ACACGGATTACACTTCCAGG	113	152
SPTAN1	24	down	AGCAAGGCAGCATAGCACTG	GTTCATTCGCTTCACGGAAC	135	195
ST7	15	up	TTTCTGCAGCTCATGAAGCC	GCTTCAGCAATGGTTGTTGC	91	160
STX2	10	down	CCACAGACTATGTAGAACACG	TGGCTCTTGGGATATGGTTG	169	295
SULF2	20	up	GGAGGAAGCTATGAGCAATAC	CACAGGTCTGCTGGAAATCA	147	201
TBC1D23	15	up	GGTGAATCTCCTAATGGCTC	CTTCTTCATCCCCAATGCTG	217	262
TCF7L2	4	down	CAAGATGGAGGGCTCTTTAAG	AGTGGCCATTTCATCTGGAG	137	206
TPM1	8	down	AGCTGGTCATCATTGAGAGC	TTCTTCTTCAAGCTCGGCAC	86	162
TSC2	27	down	CGGTCCAATGTCCTCTTGTC	CACTGGTGAGGGACGTCTG	115	244
TTC7A	7	up	CATGTCCATGGAGAACAAGC	AACAGGTGATCACTTCCTCC	146	204
USO1	12	down	GCTACAAGTATTGGCAACCC	ATGCGTTACTGCAATGGGAC	144	165
USP8	13	up	TTCCTGATCGTTCCACCAAG	GTCAAAGGTTCTCGTTGAGC	502	589
WDFY3	46	up	TACCCTTACGTGCCAGAAAC	TCTGAACTCTCCACAATGGC	152	203
YAP1	7	down	CAACCAGCAGCAACAGATGC	GTTGGTAACTGGCTACGCAG	124	174
ZDHHC7	4	up	TGTCATGACGTGGCTTCTGG	GCTTCAGCTGCAAGCTCTCC	221	332
Primers for qPCR
gene symbol	Forward	Reverse	PCR product size
ESRP1	ATGTTGCCCTGGTTCACCTG	GAGAGGCTCCATATCGAGAG	104
ESRP2	TTGGGGTCTGGGAAGTCAAG	GCTTTATCACCTCGGGCTTC	96
MBNL1	ACGAGTAATCGCCTGCTTTG	CGTCCATTTATCTCCAACTGC	106
MBNL2	CACGCTCTGATGAAGAATGC	CTTGCAGTTCTCTCTCGAAC	119
RBM47	GTATACTCTCGTTCTGCGAC	ATGTCAAAGGCATCCACAGC	86
RBFOX2	GCTACAGCACGTGTAATGAC	GGACCATATACAGCTCCAAC	92
RNA18S5	GTAACCCGTTGAACCCCATT	CCATCCAATCGGTAGTAGCG	131
MAP1LC3B	GATGTCCGACTTATTCGAGAGC	TTGAGCTGTAAGCGCCTTCTA	167
SQSTM1	CAGCTTCTGGTCCATCGGAG	TTCTTTTCCCTCCGTGCTCC	126

## Sheet: siRNAs&TOSS 
siRNAs
Target	siRNA_name	F_siRNA_seq
CTRL(GL2)	siGL2#1	CGUACGCGGAAUACUUCGA[dT][dT]
ESRP1	siESRP1#1	CACAAUGACAGAGUAUUUA[dT][dT]
ESRP2	siESRP2#1	AGCCCGAGGUGAUAAAGCA[dT][dT]
RBFOX2	siRBFOX2#1	GCAAAUGGUUGGAAAUUAA[dT][dT]
MBNL1	siMBNL1#1	CAAACCGACAAUCAUUUUC[dT][dT]
MBNL1	siMBNL1#2	AUCUGGGUAACAUACUUGU[dT][dT]
MBNL2	siMBNL2#1	CAAAUUUGCAUUCUUCAUC[dT][dT]
MBNL2	siMBNL2#2	UUAGCAUGCAGUUUGUGGC[dT][dT]
RBM47	siRBM47#1	UGGCCAAGCCCGUGGACAA[dT][dT]
TSC2_E27	siTSC2_E27#1	CCGCAGCATCAGTGTGTCT[dT][dT]
TSC2_E27	siTSC2_E27#2	AAGAATTCAAGGAGAGCTC[dT][dT]
SLK_E15	siSLK_E15#1	CACCCAAAGAGCUGAGAAA[dT][dT]
WDFY3_E46	siWDFY3_E46#1	CTGAGACACCCGATGATAT[dT][dT]
WDFY3_E46	siWDFY3_E46#2	AAGTAAACAGCCTGAGACA[dT][dT]
RUBCN	siRUBCN#1	GCAGUGGAACAGAACAACC[dT][dT]
RUBCN_E14	siRUBCN_E14#1	CUGACUCACAUAUCAAAGA[dT][dT]
TOSSs
Target	TOSS_name	TOSS_seq
CTRL(GL2)	TOSS_GL2	UAUGAUAGGGACUUAGGGUGCGUACGCGGAAUACUUCGA
SLK_E15	TOSS_SLK_E15	UAUGAUAGGGACUUAGGGUGAGCUCCUCUUUCCUGCGUUU
TSC2_E27	TOSS_TSC2_E27	UAUGAUAGGGACUUAGGGUGAGACACACUGAUGCUGCGGC
WDFY3_E46	TOSS_WDFY3_E46	UAUGAUAGGGACUUAGGGUGGGUGUCUCAGGCUGUUUACU
RUBCN_E14	TOSS_KRUBCN_E14	UAUGAUAGGGACUUAGGGUGUGACAGUCCGUUCUUUGAUA

## Sheet: Antibodies
Primary antibodies:
Mouse anti-MBNL1 (Morris Lab, 1/100 WB)
Mouse anti-MBNL2 (Morris Lab, 1/200 WB)
Mouse anti-SQSTM1/p62 (ab56416, Abcam, 1/20.000 WB, 1/1.000 IF)
Rabbit anti-RBFOX2 (A300-864A, Bethyl, 1/1.000 WB)
Rabbit anti-H3 (ab1791, Abcam, 1/10.000 WB, 1/200 IF)
Rabbit anti-alpha-tubulin (ab4074, Abcam, 1/10.000 WB)
Rabbit anti-LC3B (L7543, Sigma, 1/3.000 WB)
Rabbit anti-RBM47 (ab167164, Abcam, 1/1.000 WB)
Rabbit anti-ESRP1 (HPA023720, Sigma, 1/1.000 WB)
Rabbit anti-ESRP2 (ab113486, Abcam, 1/1.000 WB)
Rabbit anti-4E-BP1 (9452, Cell Signaling, 1/1.000 WB)
Rabbit anti-phospho-4E-BP1 (Thr37/46) (2855, Cell Signaling, 1/1.000 WB)
Rabbit anti-phospho-4E-BP1 (Thr70) (9455, Cell Signaling, 1/1.000 WB)
Rabbit anti-S6 (2217, Cell Signaling, 1/1.000 WB)
Rabbit anti-phospho-S6 (Ser240/244) (2215, Cell Signaling, 1/1.000 WB)
Rabbit anti-phospho-p70 S6 Kinase (Thr389) (9234, Cell Signaling, 1/1.000 WB)
Rabbit anti-SLK (ab65113, Abcam, 1/1,000 WB, 1/100 IF)
Secondary antibodies:
Donkey anti-Mouse IgG – HRP Conjugated (A90-137P, Bethyl, 1/20.000 WB)
Donkey anti-Rabbit IgG – HRP Conjugated (A120-108P, Bethyl, 1/20.000 WB)
Goat anti-Mouse igG (Alexa Fluor 488 conjugate) (4408, Cell Signaling, 1/2.000 IF)
Goat anti-Mouse igG (Alexa Fluor 647 conjugate) (4410, Cell Signaling, 1/2.000 IF)
Goat anti-Rabbit igG (Alexa Fluor 488 conjugate) (4412, Cell Signaling, 1/2.000 IF)
Goat anti-Rabbit igG (Alexa Fluor 647 conjugate) (4414, Cell Signaling, 1/2.000 IF)
