# Supplementary material for: Identification of protein features encoded by alternative exons using Exon Ontology
Source: Genome Res. 2017 Jun;27(6):1087–97. doi: 10.1101/gr.212696.116 (PMC5453322; doi:10.1101/gr.212696.116)
Supplement: Supplemental Material [file supp_gr.212696.116_Supplemental_Table_S2.xlsx]

## Sheet: Summary
Supplemental Table S2: Exon Ontology terms
Sheet 1: Catalytic
Sheet 2: Receptor
Sheet 3: Transporter
Sheet 4: Binding
Sheet 5: Localization
Sheet 6: Structure
Sheet 7: PTM
Sheet 8: Unclassified
Sheet 9: EXONT terms used for Z-score

## Sheet: Catalytic
EO identifier	Eo name	External database	External identifier	EO ancestors
EXONT:000002	Catalytic activity	GO	GO:0003824	EXONT:000001
EXONT:000018	Active site			EXONT:000001,EXONT:000002
EXONT:001887	Enzyme regulator activity	GO_molecular_function	GO:0030234	EXONT:000001,EXONT:000002
EXONT:001888	Enzyme inhibitor activity	GO_molecular_function	GO:0004857	EXONT:000001,EXONT:000002,EXONT:001887
EXONT:001889	Peptidase inhibitor activity	GO_molecular_function	GO:0030414	EXONT:000001,EXONT:000002,EXONT:001887,EXONT:001888,EXONT:001893,EXONT:001894,EXONT:001895
EXONT:001890	Endopeptidase inhibitor activity	GO_molecular_function	GO:0004866	EXONT:000001,EXONT:000002,EXONT:001887,EXONT:001888,EXONT:001889,EXONT:001893,EXONT:001894,EXONT:001895,EXONT:001896,EXONT:001897,EXONT:001899
EXONT:001891	Cysteine-type endopeptidase inhibitor activity	GO_molecular_function	GO:0004869	EXONT:000001,EXONT:000002,EXONT:001887,EXONT:001888,EXONT:001889,EXONT:001890,EXONT:001893,EXONT:001894,EXONT:001895,EXONT:001896,EXONT:001897,EXONT:001898,EXONT:001899
EXONT:001892	Proteinase inhibitor I25, cystatin	IPR_Domain	IPR000010	EXONT:000001,EXONT:000002,EXONT:001887,EXONT:001888,EXONT:001889,EXONT:001890,EXONT:001891,EXONT:001893,EXONT:001894,EXONT:001895,EXONT:001896,EXONT:001897,EXONT:001898,EXONT:001899
EXONT:001893	Hydrolase activity	GO_molecular_function	GO:0016787	EXONT:000001,EXONT:000002
EXONT:001894	Peptidase activity	GO_molecular_function	GO:0008233	EXONT:000001,EXONT:000002,EXONT:001893
EXONT:001895	Peptidase regulator activity	GO_molecular_function	GO:0061134	EXONT:000001,EXONT:000002,EXONT:001887,EXONT:001893,EXONT:001894
EXONT:001896	Endopeptidase regulator activity	GO_molecular_function	GO:0061135	EXONT:000001,EXONT:000002,EXONT:001887,EXONT:001893,EXONT:001894,EXONT:001895,EXONT:001897,EXONT:001899
EXONT:001897	Peptidase activity, acting on L-amino acid peptides	GO_molecular_function	GO:0070011	EXONT:000001,EXONT:000002,EXONT:001893,EXONT:001894
EXONT:001898	Cysteine-type peptidase activity	GO_molecular_function	GO:0008234	EXONT:000001,EXONT:000002,EXONT:001893,EXONT:001894,EXONT:001897
EXONT:001899	Endopeptidase activity	GO_molecular_function	GO:0004175	EXONT:000001,EXONT:000002,EXONT:001893,EXONT:001894,EXONT:001897
EXONT:001902	Ligase activity	GO_molecular_function	GO:0016874	EXONT:000001,EXONT:000002
EXONT:001903	Carboxyl transferase	IPR_Domain	IPR000022	EXONT:000001,EXONT:000002,EXONT:001902
EXONT:001904	Transferase activity	GO_molecular_function	GO:0016740	EXONT:000001,EXONT:000002
EXONT:001905	Transferase activity, transferring phosphorus-containing groups	GO_molecular_function	GO:0016772	EXONT:000001,EXONT:000002,EXONT:001904
EXONT:001906	Phosphotransferase activity, alcohol group as acceptor	GO_molecular_function	GO:0016773	EXONT:000001,EXONT:000002,EXONT:001904,EXONT:001905
EXONT:001907	Phosphofructokinase activity	GO_molecular_function	GO:0008443	EXONT:000001,EXONT:000002,EXONT:001904,EXONT:001905,EXONT:001906,EXONT:001910,EXONT:001911
EXONT:001908	6-phosphofructokinase activity	GO_molecular_function	GO:0003872	EXONT:000001,EXONT:000002,EXONT:001904,EXONT:001905,EXONT:001906,EXONT:001907,EXONT:001910,EXONT:001911
EXONT:001909	Phosphofructokinase domain	IPR_Domain	IPR000023	EXONT:000001,EXONT:000002,EXONT:001904,EXONT:001905,EXONT:001906,EXONT:001907,EXONT:001908,EXONT:001910,EXONT:001911
EXONT:001910	Kinase activity	GO_molecular_function	GO:0016301	EXONT:000001,EXONT:000002,EXONT:001904,EXONT:001905
EXONT:001911	Carbohydrate kinase activity	GO_molecular_function	GO:0019200	EXONT:000001,EXONT:000002,EXONT:001904,EXONT:001905,EXONT:001910
EXONT:001912	Oxidoreductase activity	GO_molecular_function	GO:0016491	EXONT:000001,EXONT:000002
EXONT:001913	Oxidoreductase activity, acting on peroxide as acceptor	GO_molecular_function	GO:0016684	EXONT:000001,EXONT:000002,EXONT:001912
EXONT:001914	Peroxidase activity	GO_molecular_function	GO:0004601	EXONT:000001,EXONT:000002,EXONT:001912,EXONT:001913
EXONT:001920	Hydrolase activity, acting on glycosyl bonds	GO_molecular_function	GO:0016798	EXONT:000001,EXONT:000002,EXONT:001893
EXONT:001921	Hydrolase activity, hydrolyzing N-glycosyl compounds	GO_molecular_function	GO:0016799	EXONT:000001,EXONT:000002,EXONT:001893,EXONT:001920
EXONT:001922	DNA N-glycosylase activity	GO_molecular_function	GO:0019104	EXONT:000001,EXONT:000002,EXONT:001893,EXONT:001920,EXONT:001921
EXONT:001925	Aspartic-type endopeptidase activity	GO_molecular_function	GO:0004190	EXONT:000001,EXONT:000002,EXONT:001893,EXONT:001894,EXONT:001897,EXONT:001899,EXONT:001927
EXONT:001927	Aspartic-type peptidase activity	GO_molecular_function	GO:0070001	EXONT:000001,EXONT:000002,EXONT:001893,EXONT:001894,EXONT:001897
EXONT:001943	Hydrolase activity, acting on acid anhydrides	GO_molecular_function	GO:0016817	EXONT:000001,EXONT:000002,EXONT:001893
EXONT:001944	Hydrolase activity, acting on acid anhydrides, in phosphorus-containing anhydrides	GO_molecular_function	GO:0016818	EXONT:000001,EXONT:000002,EXONT:001893,EXONT:001943
EXONT:001945	NUDIX hydrolase, NudL, conserved site	IPR_Site	IPR000059	EXONT:000001,EXONT:000002,EXONT:000005,EXONT:001893,EXONT:001937,EXONT:001938,EXONT:001939,EXONT:001940,EXONT:001943,EXONT:001944,EXONT:001946,EXONT:001947
EXONT:001957	Hydrolase activity, acting on ester bonds	GO_molecular_function	GO:0016788	EXONT:000001,EXONT:000002,EXONT:001893
EXONT:001958	Carboxylic ester hydrolase activity	GO_molecular_function	GO:0052689	EXONT:000001,EXONT:000002,EXONT:001893,EXONT:001957
EXONT:001971	NUDIX hydrolase domain	IPR_Domain	IPR000086	EXONT:000001,EXONT:000002,EXONT:001893,EXONT:001972
EXONT:001972	NUDIX hydrolase domain-like	IPR_Domain	IPR015797	EXONT:000001,EXONT:000002,EXONT:001893
EXONT:001977	Pyruvate/Phosphoenolpyruvate kinase-like domain	IPR_Domain	IPR015813	EXONT:000001,EXONT:000002
EXONT:001980	Serine hydrolase activity	GO_molecular_function	GO:0017171	EXONT:000001,EXONT:000002,EXONT:001893
EXONT:001981	Serine-type peptidase activity	GO_molecular_function	GO:0008236	EXONT:000001,EXONT:000002,EXONT:001893,EXONT:001894,EXONT:001897,EXONT:001980
EXONT:001982	Ubiquitin-activating enzyme repeat	IPR_Repeat	IPR000127	EXONT:000001,EXONT:000002,EXONT:000005,EXONT:000007,EXONT:000025,EXONT:000027,EXONT:001928,EXONT:001932,EXONT:001937,EXONT:001983,EXONT:001984,EXONT:001985,EXONT:001986,EXONT:001987,EXONT:001988,EXONT:001989,EXONT:001990,EXONT:001991,EXONT:001992,EXONT:001993,EXONT:001994,EXONT:001995,EXONT:001996,EXONT:001997,EXONT:001998,EXONT:001999
EXONT:001983	Small protein activating enzyme activity	GO_molecular_function	GO:0008641	EXONT:000001,EXONT:000002
EXONT:002000	Hydrolase activity, acting on carbon-nitrogen (but not peptide) bonds	GO_molecular_function	GO:0016810	EXONT:000001,EXONT:000002,EXONT:001893
EXONT:002002	Hydroxymethylglutaryl-CoA lyase, active site	IPR_Site	IPR000138	EXONT:000001,EXONT:000002,EXONT:000018,EXONT:002003,EXONT:002004,EXONT:002005,EXONT:002006
EXONT:002003	Lyase activity	GO_molecular_function	GO:0016829	EXONT:000001,EXONT:000002
EXONT:002004	Carbon-carbon lyase activity	GO_molecular_function	GO:0016830	EXONT:000001,EXONT:000002,EXONT:002003
EXONT:002005	Oxo-acid-lyase activity	GO_molecular_function	GO:0016833	EXONT:000001,EXONT:000002,EXONT:002003,EXONT:002004
EXONT:002006	Hydroxymethylglutaryl-CoA lyase activity	GO_molecular_function	GO:0004419	EXONT:000001,EXONT:000002,EXONT:002003,EXONT:002004,EXONT:002005
EXONT:002013	Cysteine peptidase, cysteine active site	IPR_Site	IPR000169	EXONT:000001,EXONT:000002,EXONT:000011,EXONT:000018
EXONT:002015	Oxidoreductase activity, acting on CH-OH group of donors	GO_molecular_function	GO:0016614	EXONT:000001,EXONT:000002,EXONT:001912
EXONT:002016	Glucose-methanol-choline oxidoreductase, N-terminal	IPR_Domain	IPR000172	EXONT:000001,EXONT:000002,EXONT:000005,EXONT:001912,EXONT:001928,EXONT:001932,EXONT:001937,EXONT:001984,EXONT:001987,EXONT:001988,EXONT:001997,EXONT:002015,EXONT:002017,EXONT:002018,EXONT:002019
EXONT:002023	Renal dipeptidase, active site	IPR_Site	IPR000180	EXONT:000001,EXONT:000002,EXONT:000018,EXONT:001893,EXONT:001894,EXONT:001897,EXONT:002024,EXONT:002025,EXONT:002026,EXONT:002027,EXONT:002028,EXONT:002029
EXONT:002024	Metallopeptidase activity	GO_molecular_function	GO:0008237	EXONT:000001,EXONT:000002,EXONT:001893,EXONT:001894,EXONT:001897
EXONT:002025	Metalloexopeptidase activity	GO_molecular_function	GO:0008235	EXONT:000001,EXONT:000002,EXONT:001893,EXONT:001894,EXONT:001897,EXONT:002024,EXONT:002026
EXONT:002026	Exopeptidase activity	GO_molecular_function	GO:0008238	EXONT:000001,EXONT:000002,EXONT:001893,EXONT:001894,EXONT:001897
EXONT:002027	Dipeptidase activity	GO_molecular_function	GO:0016805	EXONT:000001,EXONT:000002,EXONT:001893,EXONT:001894,EXONT:001897,EXONT:002026
EXONT:002028	Aminopeptidase activity	GO_molecular_function	GO:0004177	EXONT:000001,EXONT:000002,EXONT:001893,EXONT:001894,EXONT:001897,EXONT:002026
EXONT:002029	Dipeptidyl-peptidase activity	GO_molecular_function	GO:0008239	EXONT:000001,EXONT:000002,EXONT:001893,EXONT:001894,EXONT:001897,EXONT:002026,EXONT:002028
EXONT:002031	GNAT domain	IPR_Domain	IPR000182	EXONT:000001,EXONT:000002,EXONT:000011,EXONT:001904,EXONT:002030,EXONT:002032,EXONT:002033,EXONT:002034,EXONT:002035,EXONT:002036
EXONT:002032	Transferase activity, transferring acyl groups	GO_molecular_function	GO:0016746	EXONT:000001,EXONT:000002,EXONT:001904
EXONT:002033	Transferase activity, transferring acyl groups other than amino-acyl groups	GO_molecular_function	GO:0016747	EXONT:000001,EXONT:000002,EXONT:001904,EXONT:002032
EXONT:002034	Acetyltransferase activity	GO_molecular_function	GO:0016407	EXONT:000001,EXONT:000002,EXONT:001904,EXONT:002032,EXONT:002033
EXONT:002035	N-acetyltransferase activity	GO_molecular_function	GO:0008080	EXONT:000001,EXONT:000002,EXONT:001904,EXONT:002032,EXONT:002033,EXONT:002034,EXONT:002036
EXONT:002036	N-acyltransferase activity	GO_molecular_function	GO:0016410	EXONT:000001,EXONT:000002,EXONT:001904,EXONT:002032,EXONT:002033
EXONT:002041	Transferase activity, transferring glycosyl groups	GO_molecular_function	GO:0016757	EXONT:000001,EXONT:000002,EXONT:001904
EXONT:002046	Enzyme activator activity	GO_molecular_function	GO:0008047	EXONT:000001,EXONT:000002,EXONT:001887
EXONT:002047	GTPase activator activity	GO_molecular_function	GO:0005096	EXONT:000001,EXONT:000002,EXONT:001887,EXONT:001893,EXONT:001943,EXONT:001944,EXONT:002046,EXONT:002051,EXONT:002052,EXONT:002054,EXONT:002055,EXONT:002056
EXONT:002048	Ras GTPase activator activity	GO_molecular_function	GO:0005099	EXONT:000001,EXONT:000002,EXONT:001887,EXONT:001893,EXONT:001943,EXONT:001944,EXONT:002046,EXONT:002047,EXONT:002051,EXONT:002052,EXONT:002053,EXONT:002054,EXONT:002055,EXONT:002056
EXONT:002049	Rab GTPase activator activity	GO_molecular_function	GO:0005097	EXONT:000001,EXONT:000002,EXONT:001887,EXONT:001893,EXONT:001943,EXONT:001944,EXONT:002046,EXONT:002047,EXONT:002048,EXONT:002051,EXONT:002052,EXONT:002053,EXONT:002054,EXONT:002055,EXONT:002056
EXONT:002050	Rab-GTPase-TBC domain	IPR_Domain	IPR000195	EXONT:000001,EXONT:000002,EXONT:001887,EXONT:001893,EXONT:001943,EXONT:001944,EXONT:002046,EXONT:002047,EXONT:002048,EXONT:002049,EXONT:002051,EXONT:002052,EXONT:002053,EXONT:002054,EXONT:002055,EXONT:002056
EXONT:002051	Nucleoside-triphosphatase regulator activity	GO_molecular_function	GO:0060589	EXONT:000001,EXONT:000002,EXONT:001887,EXONT:001893,EXONT:001943,EXONT:001944,EXONT:002054,EXONT:002055
EXONT:002052	GTPase regulator activity	GO_molecular_function	GO:0030695	EXONT:000001,EXONT:000002,EXONT:001887,EXONT:001893,EXONT:001943,EXONT:001944,EXONT:002051,EXONT:002054,EXONT:002055,EXONT:002056
EXONT:002053	Small GTPase regulator activity	GO_molecular_function	GO:0005083	EXONT:000001,EXONT:000002,EXONT:001887,EXONT:001893,EXONT:001943,EXONT:001944,EXONT:002051,EXONT:002052,EXONT:002054,EXONT:002055,EXONT:002056
EXONT:002054	Pyrophosphatase activity	GO_molecular_function	GO:0016462	EXONT:000001,EXONT:000002,EXONT:001893,EXONT:001943,EXONT:001944
EXONT:002055	Nucleoside-triphosphatase activity	GO_molecular_function	GO:0017111	EXONT:000001,EXONT:000002,EXONT:001893,EXONT:001943,EXONT:001944,EXONT:002054
EXONT:002056	GTPase activity	GO_molecular_function	GO:0003924	EXONT:000001,EXONT:000002,EXONT:001893,EXONT:001943,EXONT:001944,EXONT:002054,EXONT:002055
EXONT:002059	Zinc finger, TAZ-type	IPR_Domain	IPR000197	EXONT:000001,EXONT:000002,EXONT:000005,EXONT:000015,EXONT:001904,EXONT:001937,EXONT:001938,EXONT:001939,EXONT:001940,EXONT:001941,EXONT:002032,EXONT:002033,EXONT:002034,EXONT:002035,EXONT:002036,EXONT:002058,EXONT:002060,EXONT:002061
EXONT:002060	Acetyl-CoA:L-lysine N6-acetyltransferase	GO_molecular_function	GO:0090595	EXONT:000001,EXONT:000002,EXONT:001904,EXONT:002032,EXONT:002033,EXONT:002034,EXONT:002035,EXONT:002036
EXONT:002061	Histone acetyltransferase activity	GO_molecular_function	GO:0004402	EXONT:000001,EXONT:000002,EXONT:001904,EXONT:002032,EXONT:002033,EXONT:002034,EXONT:002035,EXONT:002036,EXONT:002060
EXONT:002064	Cysteine-type endopeptidase activity	GO_molecular_function	GO:0004197	EXONT:000001,EXONT:000002,EXONT:001893,EXONT:001894,EXONT:001897,EXONT:001898,EXONT:001899
EXONT:002067	Nucleotidyltransferase activity	GO_molecular_function	GO:0016779	EXONT:000001,EXONT:000002,EXONT:001904,EXONT:001905
EXONT:002068	DNA polymerase activity	GO_molecular_function	GO:0034061	EXONT:000001,EXONT:000002,EXONT:001904,EXONT:001905,EXONT:002067
EXONT:002069	DNA-directed DNA polymerase activity	GO_molecular_function	GO:0003887	EXONT:000001,EXONT:000002,EXONT:001904,EXONT:001905,EXONT:002067,EXONT:002068
EXONT:002072	RNA polymerase activity	GO_molecular_function	GO:0034062	EXONT:000001,EXONT:000002,EXONT:001904,EXONT:001905,EXONT:002067
EXONT:002074	Serine-type endopeptidase activity	GO_molecular_function	GO:0004252	EXONT:000001,EXONT:000002,EXONT:001893,EXONT:001894,EXONT:001897,EXONT:001899,EXONT:001980,EXONT:001981
EXONT:002075	Peptidase S8/S53 domain	IPR_Domain	IPR000209	EXONT:000001,EXONT:000002,EXONT:001893,EXONT:001894,EXONT:001897,EXONT:001899,EXONT:001980,EXONT:001981,EXONT:002074
EXONT:002078	Carbon-oxygen lyase activity	GO_molecular_function	GO:0016835	EXONT:000001,EXONT:000002,EXONT:002003
EXONT:002079	DNA-(apurinic or apyrimidinic site) lyase activity	GO_molecular_function	GO:0003906	EXONT:000001,EXONT:000002,EXONT:001893,EXONT:001957,EXONT:002003,EXONT:002078,EXONT:002081,EXONT:002082,EXONT:002083,EXONT:002084
EXONT:002080	Zinc finger, DNA glycosylase/AP lyase-type	IPR_Domain	IPR000214	EXONT:000001,EXONT:000002,EXONT:000005,EXONT:001893,EXONT:001920,EXONT:001921,EXONT:001937,EXONT:001938,EXONT:001939,EXONT:001940,EXONT:001941,EXONT:001957,EXONT:002003,EXONT:002078,EXONT:002079,EXONT:002081,EXONT:002082,EXONT:002083,EXONT:002084
EXONT:002081	Nuclease activity	GO_molecular_function	GO:0004518	EXONT:000001,EXONT:000002,EXONT:001893,EXONT:001957
EXONT:002082	Endonuclease activity	GO_molecular_function	GO:0004519	EXONT:000001,EXONT:000002,EXONT:001893,EXONT:001957,EXONT:002081
EXONT:002083	Endodeoxyribonuclease activity	GO_molecular_function	GO:0004520	EXONT:000001,EXONT:000002,EXONT:001893,EXONT:001957,EXONT:002081,EXONT:002082,EXONT:002084
EXONT:002084	Deoxyribonuclease activity	GO_molecular_function	GO:0004536	EXONT:000001,EXONT:000002,EXONT:001893,EXONT:001957,EXONT:002081
EXONT:002092	Protein phosphatase 2C, manganese/magnesium aspartate binding site	IPR_Site	IPR000222	EXONT:000001,EXONT:000002,EXONT:000005,EXONT:001893,EXONT:001957,EXONT:002093,EXONT:002094,EXONT:002095,EXONT:002096
EXONT:002093	Phosphoric ester hydrolase activity	GO_molecular_function	GO:0042578	EXONT:000001,EXONT:000002,EXONT:001893,EXONT:001957
EXONT:002094	Phosphatase activity	GO_molecular_function	GO:0016791	EXONT:000001,EXONT:000002,EXONT:001893,EXONT:001957,EXONT:002093
EXONT:002095	Phosphoprotein phosphatase activity	GO_molecular_function	GO:0004721	EXONT:000001,EXONT:000002,EXONT:001893,EXONT:001957,EXONT:002093,EXONT:002094
EXONT:002096	Protein serine/threonine phosphatase activity	GO_molecular_function	GO:0004722	EXONT:000001,EXONT:000002,EXONT:001893,EXONT:001957,EXONT:002093,EXONT:002094,EXONT:002095
EXONT:002105	Protein-tyrosine/Dual specificity phosphatase	IPR_Domain	IPR000387	EXONT:000001,EXONT:000002,EXONT:001893,EXONT:001957,EXONT:002093,EXONT:002094
EXONT:002106	Protein-tyrosine phosphatase, receptor/non-receptor type	IPR_Domain	IPR000242	EXONT:000001,EXONT:000002,EXONT:001893,EXONT:001957,EXONT:002093,EXONT:002094,EXONT:002095,EXONT:002105,EXONT:002107
EXONT:002107	Protein tyrosine phosphatase activity	GO_molecular_function	GO:0004725	EXONT:000001,EXONT:000002,EXONT:001893,EXONT:001957,EXONT:002093,EXONT:002094,EXONT:002095
EXONT:002111	Hydrolase activity, hydrolyzing O-glycosyl compounds	GO_molecular_function	GO:0004553	EXONT:000001,EXONT:000002,EXONT:001893,EXONT:001920
EXONT:002117	Carboxy-lyase activity	GO_molecular_function	GO:0016831	EXONT:000001,EXONT:000002,EXONT:002003,EXONT:002004
EXONT:002118	Uroporphyrinogen decarboxylase activity	GO_molecular_function	GO:0004853	EXONT:000001,EXONT:000002,EXONT:002003,EXONT:002004,EXONT:002117
EXONT:002119	Uroporphyrinogen decarboxylase (URO-D)	IPR_Domain	IPR000257	EXONT:000001,EXONT:000002,EXONT:002003,EXONT:002004,EXONT:002117,EXONT:002118
EXONT:002123	Oxidoreductase activity, acting on NAD(P)H	GO_molecular_function	GO:0016651	EXONT:000001,EXONT:000002,EXONT:001912
EXONT:002124	NADH dehydrogenase activity	GO_molecular_function	GO:0003954	EXONT:000001,EXONT:000002,EXONT:001912,EXONT:002123
EXONT:002125	NADH dehydrogenase (quinone) activity	GO_molecular_function	GO:0050136	EXONT:000001,EXONT:000002,EXONT:001912,EXONT:002123,EXONT:002124,EXONT:002128
EXONT:002126	NADH dehydrogenase (ubiquinone) activity	GO_molecular_function	GO:0008137	EXONT:000001,EXONT:000002,EXONT:001912,EXONT:002123,EXONT:002124,EXONT:002125,EXONT:002128
EXONT:002128	Oxidoreductase activity, acting on NAD(P)H, quinone or similar compound as acceptor	GO_molecular_function	GO:0016655	EXONT:000001,EXONT:000002,EXONT:001912,EXONT:002123
EXONT:002130	Aldolase-type TIM barrel	IPR_Domain	IPR013785	EXONT:000001,EXONT:000002
EXONT:002131	FMN-dependent dehydrogenase	IPR_Domain	IPR000262	EXONT:000001,EXONT:000002,EXONT:001912,EXONT:002130
EXONT:002135	NADH:ubiquinone oxidoreductase, 75kDa subunit, conserved site	IPR_Site	IPR000283	EXONT:000001,EXONT:000002,EXONT:001912,EXONT:002123,EXONT:002124,EXONT:002125,EXONT:002126,EXONT:002128
EXONT:002139	Isomerase activity	GO_molecular_function	GO:0016853	EXONT:000001,EXONT:000002
EXONT:002140	Peptidyl-prolyl cis-trans isomerase, PpiC-type	IPR_Domain	IPR000297	EXONT:000001,EXONT:000002,EXONT:002139
EXONT:002141	Heme-copper terminal oxidase activity	GO_molecular_function	GO:0015002	EXONT:000001,EXONT:000002,EXONT:001912
EXONT:002151	Glycosyl transferase, family 3	IPR_Domain	IPR000312	EXONT:000001,EXONT:000002,EXONT:001904,EXONT:002041
EXONT:002154	Trypsin-like cysteine/serine peptidase domain	IPR_Domain	IPR009003	EXONT:000001,EXONT:000002
EXONT:002162	Oxidoreductase activity, acting on the aldehyde or oxo group of donors	GO_molecular_function	GO:0016903	EXONT:000001,EXONT:000002,EXONT:001912
EXONT:002163	Oxidoreductase activity, acting on the aldehyde or oxo group of donors, NAD or NADP as acceptor	GO_molecular_function	GO:0016620	EXONT:000001,EXONT:000002,EXONT:001912,EXONT:002162
EXONT:002167	Monooxygenase activity	GO_molecular_function	GO:0004497	EXONT:000001,EXONT:000002,EXONT:001912
EXONT:002168	Copper type II, ascorbate-dependent monooxygenase, N-terminal	IPR_Domain	IPR000323	EXONT:000001,EXONT:000002,EXONT:000005,EXONT:001912,EXONT:001937,EXONT:001938,EXONT:001939,EXONT:001940,EXONT:002167,EXONT:002169,EXONT:002170,EXONT:002171
EXONT:002169	Oxidoreductase activity, acting on paired donors, with incorporation or reduction of molecular oxygen, reduced ascorbate as one donor, and incorporation of one atom of oxygen	GO_molecular_function	GO:0016715	EXONT:000001,EXONT:000002,EXONT:001912,EXONT:002167,EXONT:002170
EXONT:002170	Oxidoreductase activity, acting on paired donors, with incorporation or reduction of molecular oxygen	GO_molecular_function	GO:0016705	EXONT:000001,EXONT:000002,EXONT:001912
EXONT:002172	Phosphatidic acid phosphatase type 2/haloperoxidase	IPR_Domain	IPR000326	EXONT:000001,EXONT:000002
EXONT:002176	Rap GTPase activating protein domain	IPR_Domain	IPR000331	EXONT:000001,EXONT:000002,EXONT:001887,EXONT:001893,EXONT:001943,EXONT:001944,EXONT:002046,EXONT:002047,EXONT:002051,EXONT:002052,EXONT:002054,EXONT:002055,EXONT:002056
EXONT:002183	Protein tyrosine/serine/threonine phosphatase activity	GO_molecular_function	GO:0008138	EXONT:000001,EXONT:000002,EXONT:001893,EXONT:001957,EXONT:002093,EXONT:002094,EXONT:002095
EXONT:002184	Dual specificity phosphatase, catalytic domain	IPR_Domain	IPR000340	EXONT:000001,EXONT:000002,EXONT:001893,EXONT:001957,EXONT:002093,EXONT:002094,EXONT:002095,EXONT:002183
EXONT:002204	MoaA/nifB/pqqE, iron-sulphur binding, conserved site	IPR_Site	IPR000385	EXONT:000001,EXONT:000002,EXONT:000005,EXONT:001937,EXONT:001938,EXONT:001939,EXONT:002205,EXONT:002206,EXONT:002207
EXONT:002212	Protein kinase-like domain	IPR_Domain	IPR011009	EXONT:000001,EXONT:000002,EXONT:001904,EXONT:001905
EXONT:002213	Phosphatidylinositol 3-/4-kinase, catalytic domain	IPR_Domain	IPR000403	EXONT:000001,EXONT:000002,EXONT:001904,EXONT:001905,EXONT:001906,EXONT:002212
EXONT:002217	Nitroreductase-like	IPR_Domain	IPR000415	EXONT:000001,EXONT:000002,EXONT:001912
EXONT:002224	Proteasome alpha-subunit, N-terminal domain	IPR_Domain	IPR000426	EXONT:000001,EXONT:000002,EXONT:001893,EXONT:001894,EXONT:001897,EXONT:001899
EXONT:002244	Transmembrane receptor protein kinase activity	GO_molecular_function	GO:0019199	EXONT:000001,EXONT:000002,EXONT:000003,EXONT:000012,EXONT:001904,EXONT:001905,EXONT:001906,EXONT:001910,EXONT:002242,EXONT:002243,EXONT:002248
EXONT:002245	Transmembrane receptor protein serine/threonine kinase activity	GO_molecular_function	GO:0004675	EXONT:000001,EXONT:000002,EXONT:000003,EXONT:000012,EXONT:001904,EXONT:001905,EXONT:001906,EXONT:001910,EXONT:002242,EXONT:002243,EXONT:002244,EXONT:002248,EXONT:002249
EXONT:002246	TGF-beta receptor/activin receptor, type I/II	IPR_Domain	IPR000472	EXONT:000001,EXONT:000002,EXONT:000003,EXONT:000012,EXONT:001904,EXONT:001905,EXONT:001906,EXONT:001910,EXONT:002242,EXONT:002243,EXONT:002244,EXONT:002245,EXONT:002247,EXONT:002248,EXONT:002249
EXONT:002247	Transforming growth factor beta-activated receptor activity	GO_molecular_function	GO:0005024	EXONT:000001,EXONT:000002,EXONT:000003,EXONT:000012,EXONT:001904,EXONT:001905,EXONT:001906,EXONT:001910,EXONT:002242,EXONT:002243,EXONT:002244,EXONT:002245,EXONT:002248,EXONT:002249
EXONT:002248	Protein kinase activity	GO_molecular_function	GO:0004672	EXONT:000001,EXONT:000002,EXONT:001904,EXONT:001905,EXONT:001906,EXONT:001910
EXONT:002249	Protein serine/threonine kinase activity	GO_molecular_function	GO:0004674	EXONT:000001,EXONT:000002,EXONT:001904,EXONT:001905,EXONT:001906,EXONT:001910,EXONT:002248
EXONT:002266	Oxidoreductase activity, acting on the CH-OH group of donors, NAD or NADP as acceptor	GO_molecular_function	GO:0016616	EXONT:000001,EXONT:000002,EXONT:001912,EXONT:002015
EXONT:002273	Magnesium chelatase, ChlI subunit	IPR_Domain	IPR000523	EXONT:000001,EXONT:000002,EXONT:000011,EXONT:001902,EXONT:002271,EXONT:002272,EXONT:002274,EXONT:002275,EXONT:002276
EXONT:002274	Ligase activity, forming nitrogen-metal bonds	GO_molecular_function	GO:0051002	EXONT:000001,EXONT:000002,EXONT:001902
EXONT:002275	Ligase activity, forming nitrogen-metal bonds, forming coordination complexes	GO_molecular_function	GO:0051003	EXONT:000001,EXONT:000002,EXONT:001902,EXONT:002274
EXONT:002276	Magnesium chelatase activity	GO_molecular_function	GO:0016851	EXONT:000001,EXONT:000002,EXONT:001902,EXONT:002274,EXONT:002275
EXONT:002294	Diphosphotransferase activity	GO_molecular_function	GO:0016778	EXONT:000001,EXONT:000002,EXONT:001904,EXONT:001905
EXONT:002302	Ubiquitin-protein transferase activity	GO_molecular_function	GO:0004842	EXONT:000001,EXONT:000002,EXONT:001904
EXONT:002303	HECT	IPR_Domain	IPR000569	EXONT:000001,EXONT:000002,EXONT:001904,EXONT:002302
EXONT:002314	Creatinase	IPR_Domain	IPR000587	EXONT:000001,EXONT:000002,EXONT:001893
EXONT:002316	Hydroxymethylglutaryl-coenzyme A synthase, active site	IPR_Site	IPR000590	EXONT:000001,EXONT:000002,EXONT:000018,EXONT:001904,EXONT:002032,EXONT:002317,EXONT:002318
EXONT:002317	Transferase activity, transferring acyl groups, acyl groups converted into alkyl on transfer	GO_molecular_function	GO:0046912	EXONT:000001,EXONT:000002,EXONT:001904,EXONT:002032
EXONT:002318	Hydroxymethylglutaryl-CoA synthase activity	GO_molecular_function	GO:0004421	EXONT:000001,EXONT:000002,EXONT:001904,EXONT:002032,EXONT:002317
EXONT:002320	RasGAP protein, C-terminal	IPR_Domain	IPR000593	EXONT:000001,EXONT:000002,EXONT:001887,EXONT:001893,EXONT:001943,EXONT:001944,EXONT:002046,EXONT:002047,EXONT:002048,EXONT:002051,EXONT:002052,EXONT:002053,EXONT:002054,EXONT:002055,EXONT:002056
EXONT:002321	UBA/THIF-type NAD/FAD binding fold	IPR_Domain	IPR000594	EXONT:000001,EXONT:000002
EXONT:002327	Glycoside hydrolase/deacetylase, beta/alpha-barrel	IPR_Domain	IPR011330	EXONT:000001,EXONT:000002
EXONT:002328	Glycoside hydrolase 38/57, N-terminal domain	IPR_Domain	IPR027291	EXONT:000001,EXONT:000002,EXONT:002327
EXONT:002329	Glycoside hydrolase family 38, N-terminal domain	IPR_Domain	IPR000602	EXONT:000001,EXONT:000002,EXONT:001893,EXONT:001920,EXONT:002111,EXONT:002327,EXONT:002328,EXONT:002330,EXONT:002331
EXONT:002330	Mannosidase activity	GO_molecular_function	GO:0015923	EXONT:000001,EXONT:000002,EXONT:001893,EXONT:001920,EXONT:002111
EXONT:002331	Alpha-mannosidase activity	GO_molecular_function	GO:0004559	EXONT:000001,EXONT:000002,EXONT:001893,EXONT:001920,EXONT:002111,EXONT:002330
EXONT:002333	Helicase activity	GO_molecular_function	GO:0004386	EXONT:000001,EXONT:000002,EXONT:001893,EXONT:001943,EXONT:001944,EXONT:002054,EXONT:002055
EXONT:002334	RNA helicase activity	GO_molecular_function	GO:0003724	EXONT:000001,EXONT:000002,EXONT:001893,EXONT:001943,EXONT:001944,EXONT:002054,EXONT:002055,EXONT:002333
EXONT:002335	Double-stranded RNA-specific adenosine deaminase (DRADA)	IPR_Domain	IPR000607	EXONT:000001,EXONT:000002,EXONT:000005,EXONT:000011,EXONT:001893,EXONT:001928,EXONT:001929,EXONT:001932,EXONT:001948,EXONT:002000,EXONT:002099,EXONT:002336,EXONT:002337,EXONT:002338,EXONT:002339
EXONT:002336	Deaminase activity	GO_molecular_function	GO:0019239	EXONT:000001,EXONT:000002
EXONT:002337	Adenosine deaminase activity	GO_molecular_function	GO:0004000	EXONT:000001,EXONT:000002,EXONT:001893,EXONT:002000,EXONT:002336,EXONT:002339
EXONT:002338	Double-stranded RNA adenosine deaminase activity	GO_molecular_function	GO:0003726	EXONT:000001,EXONT:000002,EXONT:001893,EXONT:002000,EXONT:002336,EXONT:002337,EXONT:002339
EXONT:002339	Hydrolase activity, acting on carbon-nitrogen (but not peptide) bonds, in cyclic amidines	GO_molecular_function	GO:0016814	EXONT:000001,EXONT:000002,EXONT:001893,EXONT:002000
EXONT:002341	Ubiquitin-conjugating enzyme, E2	IPR_Domain	IPR000608	EXONT:000001,EXONT:000002,EXONT:000011,EXONT:001902,EXONT:002340,EXONT:002342,EXONT:002343
EXONT:002342	Ligase activity, forming carbon-nitrogen bonds	GO_molecular_function	GO:0016879	EXONT:000001,EXONT:000002,EXONT:001902
EXONT:002343	Acid-amino acid ligase activity	GO_molecular_function	GO:0016881	EXONT:000001,EXONT:000002,EXONT:001902,EXONT:002342
EXONT:002349	RNA helicase, ATP-dependent, DEAD-box, conserved site	IPR_Site	IPR000629	EXONT:000001,EXONT:000002,EXONT:000005,EXONT:001893,EXONT:001928,EXONT:001929,EXONT:001932,EXONT:001937,EXONT:001943,EXONT:001944,EXONT:001984,EXONT:001985,EXONT:001986,EXONT:001987,EXONT:001988,EXONT:001989,EXONT:001990,EXONT:001991,EXONT:001992,EXONT:001993,EXONT:001994,EXONT:001995,EXONT:001996,EXONT:001997,EXONT:001998,EXONT:001999,EXONT:002054,EXONT:002055,EXONT:002333,EXONT:002350,EXONT:002…
EXONT:002350	ATPase activity	GO_molecular_function	GO:0016887	EXONT:000001,EXONT:000002,EXONT:001893,EXONT:001943,EXONT:001944,EXONT:002054,EXONT:002055
EXONT:002351	ATPase activity, coupled	GO_molecular_function	GO:0042623	EXONT:000001,EXONT:000002,EXONT:001893,EXONT:001943,EXONT:001944,EXONT:002054,EXONT:002055,EXONT:002350
EXONT:002352	ATP-dependent helicase activity	GO_molecular_function	GO:0008026	EXONT:000001,EXONT:000002,EXONT:001893,EXONT:001943,EXONT:001944,EXONT:002054,EXONT:002055,EXONT:002333,EXONT:002350,EXONT:002351,EXONT:002353
EXONT:002353	Purine NTP-dependent helicase activity	GO_molecular_function	GO:0070035	EXONT:000001,EXONT:000002,EXONT:001893,EXONT:001943,EXONT:001944,EXONT:002054,EXONT:002055,EXONT:002333
EXONT:002360	Peptidase M41	IPR_Domain	IPR000642	EXONT:000001,EXONT:000002,EXONT:000005,EXONT:001893,EXONT:001894,EXONT:001897,EXONT:001899,EXONT:001928,EXONT:001932,EXONT:001937,EXONT:001984,EXONT:001985,EXONT:001986,EXONT:001987,EXONT:001988,EXONT:001989,EXONT:001990,EXONT:001991,EXONT:001992,EXONT:001993,EXONT:001994,EXONT:001995,EXONT:001996,EXONT:001997,EXONT:001998,EXONT:001999,EXONT:002024,EXONT:002361
EXONT:002361	Metalloendopeptidase activity	GO_molecular_function	GO:0004222	EXONT:000001,EXONT:000002,EXONT:001893,EXONT:001894,EXONT:001897,EXONT:001899,EXONT:002024
EXONT:002367	Peptidase C1A, papain C-terminal	IPR_Domain	IPR000668	EXONT:000001,EXONT:000002,EXONT:001893,EXONT:001894,EXONT:001897,EXONT:001898
EXONT:002376	Oxidoreductase, N-terminal	IPR_Domain	IPR000683	EXONT:000001,EXONT:000002,EXONT:001912
EXONT:002379	RIO-like kinase	IPR_Domain	IPR018934	EXONT:000001,EXONT:000002,EXONT:000005,EXONT:001928,EXONT:001932,EXONT:001937,EXONT:001984,EXONT:001985,EXONT:001986,EXONT:001987,EXONT:001988,EXONT:001989,EXONT:001990,EXONT:001991,EXONT:001992,EXONT:001993,EXONT:001994,EXONT:001995,EXONT:001996,EXONT:001997,EXONT:001998,EXONT:001999
EXONT:002380	RIO kinase	IPR_Domain	IPR000687	EXONT:000001,EXONT:000002,EXONT:000005,EXONT:001904,EXONT:001905,EXONT:001906,EXONT:001910,EXONT:001928,EXONT:001932,EXONT:001937,EXONT:001984,EXONT:001985,EXONT:001986,EXONT:001987,EXONT:001988,EXONT:001989,EXONT:001990,EXONT:001991,EXONT:001992,EXONT:001993,EXONT:001994,EXONT:001995,EXONT:001996,EXONT:001997,EXONT:001998,EXONT:001999,EXONT:002248,EXONT:002249,EXONT:002379
EXONT:002399	Phosphorelay sensor kinase activity	GO_molecular_function	GO:0000155	EXONT:000001,EXONT:000002,EXONT:000003,EXONT:000012,EXONT:001904,EXONT:001905,EXONT:001906,EXONT:001910,EXONT:002242,EXONT:002248,EXONT:002401,EXONT:002402
EXONT:002400	PAS-associated, C-terminal	IPR_Domain	IPR000700	EXONT:000001,EXONT:000002,EXONT:000003,EXONT:000012,EXONT:001904,EXONT:001905,EXONT:001906,EXONT:001910,EXONT:002242,EXONT:002248,EXONT:002399,EXONT:002401,EXONT:002402
EXONT:002401	Phosphotransferase activity, nitrogenous group as acceptor	GO_molecular_function	GO:0016775	EXONT:000001,EXONT:000002,EXONT:001904,EXONT:001905
EXONT:002402	Protein histidine kinase activity	GO_molecular_function	GO:0004673	EXONT:000001,EXONT:000002,EXONT:001904,EXONT:001905,EXONT:001906,EXONT:001910,EXONT:002248,EXONT:002401
EXONT:002406	Protein kinase domain	IPR_Domain	IPR000719	EXONT:000001,EXONT:000002,EXONT:000005,EXONT:001904,EXONT:001905,EXONT:001906,EXONT:001910,EXONT:001928,EXONT:001932,EXONT:001937,EXONT:001984,EXONT:001985,EXONT:001986,EXONT:001987,EXONT:001988,EXONT:001989,EXONT:001990,EXONT:001991,EXONT:001992,EXONT:001993,EXONT:001994,EXONT:001995,EXONT:001996,EXONT:001997,EXONT:001998,EXONT:001999,EXONT:002212,EXONT:002248
EXONT:002407	RNA polymerase, alpha subunit	IPR_Domain	IPR000722	EXONT:000001,EXONT:000002,EXONT:000005,EXONT:001904,EXONT:001905,EXONT:001928,EXONT:001929,EXONT:001930,EXONT:001932,EXONT:002067,EXONT:002072,EXONT:002408
EXONT:002408	DNA-directed RNA polymerase activity	GO_molecular_function	GO:0003899	EXONT:000001,EXONT:000002,EXONT:001904,EXONT:001905,EXONT:002067,EXONT:002072
EXONT:002410	Chitinase activity	GO_molecular_function	GO:0004568	EXONT:000001,EXONT:000002,EXONT:001893,EXONT:001920,EXONT:002111
EXONT:002413	AIR synthase related protein, N-terminal domain	IPR_Domain	IPR000728	EXONT:000001,EXONT:000002,EXONT:002414
EXONT:002414	PurM, N-terminal-like	IPR_Domain	IPR016188	EXONT:000001,EXONT:000002
EXONT:002417	WHEP-TRS	IPR_Domain	IPR000738	EXONT:000001,EXONT:000002,EXONT:000005,EXONT:000011,EXONT:001902,EXONT:001928,EXONT:001932,EXONT:001937,EXONT:001984,EXONT:001985,EXONT:001986,EXONT:001987,EXONT:001988,EXONT:001989,EXONT:001990,EXONT:001991,EXONT:001992,EXONT:001993,EXONT:001994,EXONT:001995,EXONT:001996,EXONT:001997,EXONT:001998,EXONT:001999,EXONT:002416,EXONT:002418,EXONT:002419,EXONT:002420
EXONT:002418	Ligase activity, forming carbon-oxygen bonds	GO_molecular_function	GO:0016875	EXONT:000001,EXONT:000002,EXONT:001902
EXONT:002419	Ligase activity, forming aminoacyl-tRNA and related compounds	GO_molecular_function	GO:0016876	EXONT:000001,EXONT:000002,EXONT:001902,EXONT:002418
EXONT:002420	Aminoacyl-tRNA ligase activity	GO_molecular_function	GO:0004812	EXONT:000001,EXONT:000002,EXONT:001902,EXONT:002418,EXONT:002419
EXONT:002429	Diacylglycerol kinase activity	GO_molecular_function	GO:0004143	EXONT:000001,EXONT:000002,EXONT:001904,EXONT:001905,EXONT:001906,EXONT:001910
EXONT:002430	Diacylglycerol kinase, accessory domain	IPR_Domain	IPR000756	EXONT:000001,EXONT:000002,EXONT:001904,EXONT:001905,EXONT:001906,EXONT:001910,EXONT:002429
EXONT:002438	Transferase activity, transferring one-carbon groups	GO_molecular_function	GO:0016741	EXONT:000001,EXONT:000002,EXONT:001904
EXONT:002439	Methyltransferase activity	GO_molecular_function	GO:0008168	EXONT:000001,EXONT:000002,EXONT:001904,EXONT:002438
EXONT:002440	S-adenosylmethionine-dependent methyltransferase activity	GO_molecular_function	GO:0008757	EXONT:000001,EXONT:000002,EXONT:001904,EXONT:002438,EXONT:002439
EXONT:002443	RNA polymerase, subunit H/Rpb5 C-terminal	IPR_Domain	IPR000783	EXONT:000001,EXONT:000002,EXONT:000005,EXONT:001904,EXONT:001905,EXONT:001928,EXONT:001929,EXONT:001930,EXONT:001932,EXONT:002067,EXONT:002072,EXONT:002408
EXONT:002447	Hydrolase activity, acting on acid anhydrides, catalyzing transmembrane movement of substances	GO_molecular_function	GO:0016820	EXONT:000001,EXONT:000002,EXONT:000004,EXONT:001893,EXONT:001943,EXONT:002384
EXONT:002448	ATPase, F1/V1/A1 complex, alpha/beta subunit, C-terminal	IPR_Domain	IPR000793	EXONT:000001,EXONT:000002,EXONT:000004,EXONT:001893,EXONT:001943,EXONT:002384,EXONT:002447
EXONT:002449	Elongation factor, GTP-binding domain	IPR_Domain	IPR000795	EXONT:000001,EXONT:000002,EXONT:000005,EXONT:001893,EXONT:001928,EXONT:001932,EXONT:001937,EXONT:001943,EXONT:001944,EXONT:001984,EXONT:001985,EXONT:001987,EXONT:001988,EXONT:001989,EXONT:001990,EXONT:001991,EXONT:001992,EXONT:001993,EXONT:001994,EXONT:001995,EXONT:001997,EXONT:001998,EXONT:002054,EXONT:002055,EXONT:002056,EXONT:002090,EXONT:002091,EXONT:002200
EXONT:002453	Peptidase M17, leucyl aminopeptidase, C-terminal	IPR_Domain	IPR000819	EXONT:000001,EXONT:000002,EXONT:001893,EXONT:001894,EXONT:001897,EXONT:002026,EXONT:002028
EXONT:002466	Peptidase M14, carboxypeptidase A	IPR_Domain	IPR000834	EXONT:000001,EXONT:000002,EXONT:000005,EXONT:001893,EXONT:001894,EXONT:001897,EXONT:001937,EXONT:001938,EXONT:001939,EXONT:001940,EXONT:001941,EXONT:002024,EXONT:002025,EXONT:002026,EXONT:002467,EXONT:002468
EXONT:002467	Carboxypeptidase activity	GO_molecular_function	GO:0004180	EXONT:000001,EXONT:000002,EXONT:001893,EXONT:001894,EXONT:001897,EXONT:002026
EXONT:002468	Metallocarboxypeptidase activity	GO_molecular_function	GO:0004181	EXONT:000001,EXONT:000002,EXONT:001893,EXONT:001894,EXONT:001897,EXONT:002024,EXONT:002025,EXONT:002026,EXONT:002467
EXONT:002473	Phosphoribosyl pyrophosphate synthetase, conserved site	IPR_Site	IPR000842	EXONT:000001,EXONT:000002,EXONT:000005,EXONT:001904,EXONT:001905,EXONT:001937,EXONT:001938,EXONT:001939,EXONT:001946,EXONT:002294,EXONT:002474
EXONT:002474	Ribose phosphate diphosphokinase activity	GO_molecular_function	GO:0004749	EXONT:000001,EXONT:000002,EXONT:001904,EXONT:001905,EXONT:002294
EXONT:002477	Nucleoside phosphorylase domain	IPR_Domain	IPR000845	EXONT:000001,EXONT:000002
EXONT:002480	Oxidoreductase activity, acting on the CH-CH group of donors	GO_molecular_function	GO:0016627	EXONT:000001,EXONT:000002,EXONT:001912
EXONT:002481	Oxidoreductase activity, acting on the CH-CH group of donors, NAD or NADP as acceptor	GO_molecular_function	GO:0016628	EXONT:000001,EXONT:000002,EXONT:001912,EXONT:002480
EXONT:002492	Transferase activity, transferring sulfur-containing groups	GO_molecular_function	GO:0016782	EXONT:000001,EXONT:000002,EXONT:001904
EXONT:002493	Sulfotransferase activity	GO_molecular_function	GO:0008146	EXONT:000001,EXONT:000002,EXONT:001904,EXONT:002492
EXONT:002494	Sulfotransferase domain	IPR_Domain	IPR000863	EXONT:000001,EXONT:000002,EXONT:001904,EXONT:002492,EXONT:002493
EXONT:002496	Alkyl hydroperoxide reductase subunit C/ Thiol specific antioxidant	IPR_Domain	IPR000866	EXONT:000001,EXONT:000002,EXONT:000011,EXONT:001912,EXONT:002495
EXONT:002500	Isochorismatase-like	IPR_Domain	IPR000868	EXONT:000001,EXONT:000002
EXONT:002501	AMP-dependent synthetase/ligase	IPR_Domain	IPR000873	EXONT:000001,EXONT:000002
EXONT:002502	Serine-type endopeptidase inhibitor activity	GO_molecular_function	GO:0004867	EXONT:000001,EXONT:000002,EXONT:001887,EXONT:001888,EXONT:001889,EXONT:001890,EXONT:001893,EXONT:001894,EXONT:001895,EXONT:001896,EXONT:001897,EXONT:001899,EXONT:001980,EXONT:001981,EXONT:002074
EXONT:002504	Tetrapyrrole methylase	IPR_Domain	IPR000878	EXONT:000001,EXONT:000002,EXONT:001904,EXONT:002438,EXONT:002439
EXONT:002507	Pyruvate carboxyltransferase	IPR_Domain	IPR000891	EXONT:000001,EXONT:000002,EXONT:002130
EXONT:002520	Alkaline-phosphatase-like, core domain	IPR_Domain	IPR017850	EXONT:000001,EXONT:000002
EXONT:002521	Sulfatase	IPR_Domain	IPR000917	EXONT:000001,EXONT:000002,EXONT:001893,EXONT:001957,EXONT:002520,EXONT:002522
EXONT:002522	Sulfuric ester hydrolase activity	GO_molecular_function	GO:0008484	EXONT:000001,EXONT:000002,EXONT:001893,EXONT:001957
EXONT:002547	AGC-kinase, C-terminal	IPR_Domain	IPR000961	EXONT:000001,EXONT:000002,EXONT:000005,EXONT:001904,EXONT:001905,EXONT:001906,EXONT:001910,EXONT:001928,EXONT:001932,EXONT:001937,EXONT:001984,EXONT:001985,EXONT:001986,EXONT:001987,EXONT:001988,EXONT:001989,EXONT:001990,EXONT:001991,EXONT:001992,EXONT:001993,EXONT:001994,EXONT:001995,EXONT:001996,EXONT:001997,EXONT:001998,EXONT:001999,EXONT:002248,EXONT:002249
EXONT:002549	Aldehyde dehydrogenase domain	IPR_Domain	IPR015590	EXONT:000001,EXONT:000002,EXONT:001912,EXONT:002551
EXONT:002550	Gamma-glutamyl phosphate reductase GPR	IPR_Domain	IPR000965	EXONT:000001,EXONT:000002,EXONT:001912,EXONT:002162,EXONT:002163,EXONT:002549,EXONT:002551,EXONT:002552
EXONT:002551	Aldehyde/histidinol dehydrogenase	IPR_Domain	IPR016161	EXONT:000001,EXONT:000002,EXONT:001912
EXONT:002552	Glutamate-5-semialdehyde dehydrogenase activity	GO_molecular_function	GO:0004350	EXONT:000001,EXONT:000002,EXONT:001912,EXONT:002162,EXONT:002163
EXONT:002561	Ribonuclease III domain	IPR_Domain	IPR000999	EXONT:000001,EXONT:000002,EXONT:000005,EXONT:001893,EXONT:001928,EXONT:001929,EXONT:001932,EXONT:001948,EXONT:001957,EXONT:002081,EXONT:002082,EXONT:002562,EXONT:002563,EXONT:002564,EXONT:002565,EXONT:002566,EXONT:002567
EXONT:002562	Ribonuclease activity	GO_molecular_function	GO:0004540	EXONT:000001,EXONT:000002,EXONT:001893,EXONT:001957,EXONT:002081
EXONT:002563	Double-stranded RNA-specific ribonuclease activity	GO_molecular_function	GO:0032296	EXONT:000001,EXONT:000002,EXONT:001893,EXONT:001957,EXONT:002081,EXONT:002562
EXONT:002564	Ribonuclease III activity	GO_molecular_function	GO:0004525	EXONT:000001,EXONT:000002,EXONT:001893,EXONT:001957,EXONT:002081,EXONT:002082,EXONT:002562,EXONT:002563,EXONT:002565,EXONT:002566,EXONT:002567
EXONT:002565	Endoribonuclease activity	GO_molecular_function	GO:0004521	EXONT:000001,EXONT:000002,EXONT:001893,EXONT:001957,EXONT:002081,EXONT:002082,EXONT:002562
EXONT:002566	Endoribonuclease activity, producing 5'-phosphomonoesters	GO_molecular_function	GO:0016891	EXONT:000001,EXONT:000002,EXONT:001893,EXONT:001957,EXONT:002081,EXONT:002082,EXONT:002562,EXONT:002565,EXONT:002567
EXONT:002567	Endonuclease activity, active with either ribo- or deoxyribonucleic acids and producing 5'-phosphomonoesters	GO_molecular_function	GO:0016893	EXONT:000001,EXONT:000002,EXONT:001893,EXONT:001957,EXONT:002081,EXONT:002082
EXONT:002576	Oxidoreductase activity, acting on the aldehyde or oxo group of donors, disulfide as acceptor	GO_molecular_function	GO:0016624	EXONT:000001,EXONT:000002,EXONT:001912,EXONT:002162
EXONT:002577	Dehydrogenase, E1 component	IPR_Domain	IPR001017	EXONT:000001,EXONT:000002,EXONT:001912,EXONT:002162,EXONT:002576
EXONT:002578	Hydrolase activity, acting on carbon-nitrogen (but not peptide) bonds, in cyclic amides	GO_molecular_function	GO:0016812	EXONT:000001,EXONT:000002,EXONT:001893,EXONT:002000
EXONT:002590	Thioesterase	IPR_Domain	IPR001031	EXONT:000001,EXONT:000002,EXONT:001893,EXONT:001957
EXONT:002598	Phosphorus-oxygen lyase activity	GO_molecular_function	GO:0016849	EXONT:000001,EXONT:000002,EXONT:002003
EXONT:002599	Adenylyl cyclase class-3/4/guanylyl cyclase	IPR_Domain	IPR001054	EXONT:000001,EXONT:000002,EXONT:002003,EXONT:002598
EXONT:002608	O-methyltransferase activity	GO_molecular_function	GO:0008171	EXONT:000001,EXONT:000002,EXONT:001904,EXONT:002438,EXONT:002439
EXONT:002609	O-methyltransferase, family 2	IPR_Domain	IPR001077	EXONT:000001,EXONT:000002,EXONT:001904,EXONT:002438,EXONT:002439,EXONT:002608
EXONT:002610	2-oxoacid dehydrogenase acyltransferase, catalytic domain	IPR_Domain	IPR001078	EXONT:000001,EXONT:000002,EXONT:001904,EXONT:002032
EXONT:002616	Hydro-lyase activity	GO_molecular_function	GO:0016836	EXONT:000001,EXONT:000002,EXONT:002003,EXONT:002078
EXONT:002619	Lipase, GDSL	IPR_Domain	IPR001087	EXONT:000001,EXONT:000002,EXONT:001893,EXONT:001957
EXONT:002621	IMP dehydrogenase/GMP reductase	IPR_Domain	IPR001093	EXONT:000001,EXONT:000002,EXONT:002130
EXONT:002622	DNA-directed DNA polymerase, family A, palm domain	IPR_Domain	IPR001098	EXONT:000001,EXONT:000002,EXONT:000005,EXONT:001904,EXONT:001905,EXONT:001928,EXONT:001929,EXONT:001930,EXONT:001932,EXONT:002067,EXONT:002068,EXONT:002069
EXONT:002627	3-oxo-5-alpha-steroid 4-dehydrogenase, C-terminal	IPR_Domain	IPR001104	EXONT:000001,EXONT:000002,EXONT:001912,EXONT:002480
EXONT:002630	Multicopper oxidase, type 1	IPR_Domain	IPR001117	EXONT:000001,EXONT:000002,EXONT:001912
EXONT:002636	DNA-repair protein, UmuC-like	IPR_Domain	IPR001126	EXONT:000001,EXONT:000002,EXONT:000005,EXONT:001904,EXONT:001905,EXONT:001928,EXONT:001929,EXONT:001930,EXONT:001932,EXONT:002067,EXONT:002068,EXONT:002069,EXONT:002635
EXONT:002644	NADH-quinone oxidoreductase, subunit D	IPR_Domain	IPR001135	EXONT:000001,EXONT:000002,EXONT:000005,EXONT:001912,EXONT:001928,EXONT:001932,EXONT:001987,EXONT:001988,EXONT:001997,EXONT:002018,EXONT:002019,EXONT:002123,EXONT:002282,EXONT:002645
EXONT:002648	ATPase activity, coupled to transmembrane movement of substances	GO_molecular_function	GO:0042626	EXONT:000001,EXONT:000002,EXONT:000004,EXONT:001893,EXONT:001943,EXONT:001944,EXONT:002054,EXONT:002055,EXONT:002350,EXONT:002351,EXONT:002384,EXONT:002447,EXONT:002542,EXONT:002651,EXONT:002652,EXONT:002653
EXONT:002649	ABC transporter, transmembrane domain	IPR_Domain	IPR001140	EXONT:000001,EXONT:000002,EXONT:000004,EXONT:000005,EXONT:001893,EXONT:001928,EXONT:001932,EXONT:001937,EXONT:001943,EXONT:001944,EXONT:001984,EXONT:001985,EXONT:001986,EXONT:001987,EXONT:001988,EXONT:001989,EXONT:001990,EXONT:001991,EXONT:001992,EXONT:001993,EXONT:001994,EXONT:001995,EXONT:001996,EXONT:001997,EXONT:001998,EXONT:001999,EXONT:002054,EXONT:002055,EXONT:002350,EXONT:002351,EXONT:002…
EXONT:002650	ABC transporter type 1, transmembrane domain	IPR_Domain	IPR011527	EXONT:000001,EXONT:000002,EXONT:000004,EXONT:000005,EXONT:001893,EXONT:001928,EXONT:001932,EXONT:001937,EXONT:001943,EXONT:001944,EXONT:001984,EXONT:001985,EXONT:001986,EXONT:001987,EXONT:001988,EXONT:001989,EXONT:001990,EXONT:001991,EXONT:001992,EXONT:001993,EXONT:001994,EXONT:001995,EXONT:001996,EXONT:001997,EXONT:001998,EXONT:001999,EXONT:002054,EXONT:002055,EXONT:002350,EXONT:002351,EXONT:002…
EXONT:002653	ATPase activity, coupled to movement of substances	GO_molecular_function	GO:0043492	EXONT:000001,EXONT:000002,EXONT:001893,EXONT:001943,EXONT:001944,EXONT:002054,EXONT:002055,EXONT:002350,EXONT:002351
EXONT:002666	DNA helicase activity	GO_molecular_function	GO:0003678	EXONT:000001,EXONT:000002,EXONT:001893,EXONT:001943,EXONT:001944,EXONT:002054,EXONT:002055,EXONT:002333
EXONT:002667	ATP-dependent DNA helicase activity	GO_molecular_function	GO:0004003	EXONT:000001,EXONT:000002,EXONT:001893,EXONT:001943,EXONT:001944,EXONT:002054,EXONT:002055,EXONT:002333,EXONT:002350,EXONT:002351,EXONT:002352,EXONT:002353,EXONT:002666,EXONT:002668
EXONT:002668	DNA-dependent ATPase activity	GO_molecular_function	GO:0008094	EXONT:000001,EXONT:000002,EXONT:001893,EXONT:001943,EXONT:001944,EXONT:002054,EXONT:002055,EXONT:002350,EXONT:002351
EXONT:002671	Citron-like	IPR_Domain	IPR001180	EXONT:000001,EXONT:000002,EXONT:001887,EXONT:001893,EXONT:001943,EXONT:001944,EXONT:002051,EXONT:002052,EXONT:002053,EXONT:002054,EXONT:002055,EXONT:002056
EXONT:002685	Diacylglycerol kinase, catalytic domain	IPR_Domain	IPR001206	EXONT:000001,EXONT:000002,EXONT:001904,EXONT:001905,EXONT:001906,EXONT:001910,EXONT:002429
EXONT:002693	Glycoside hydrolase, family 18, catalytic domain	IPR_Domain	IPR001223	EXONT:000001,EXONT:000002,EXONT:000011,EXONT:001893,EXONT:001920,EXONT:002111,EXONT:002691,EXONT:002692
EXONT:002696	Acyl transferase domain	IPR_Domain	IPR001227	EXONT:000001,EXONT:000002,EXONT:000011,EXONT:001904,EXONT:002695
EXONT:002697	2-C-methyl-D-erythritol 4-phosphate cytidylyltransferase	IPR_Domain	IPR001228	EXONT:000001,EXONT:000002
EXONT:002699	Lactate/malate dehydrogenase, N-terminal	IPR_Domain	IPR001236	EXONT:000001,EXONT:000002,EXONT:000011,EXONT:001912,EXONT:002478
EXONT:002700	Intramolecular oxidoreductase activity	GO_molecular_function	GO:0016860	EXONT:000001,EXONT:000002,EXONT:002139
EXONT:002701	Intramolecular oxidoreductase activity, interconverting aldoses and ketoses	GO_molecular_function	GO:0016861	EXONT:000001,EXONT:000002,EXONT:002139,EXONT:002700
EXONT:002705	Serine-threonine/tyrosine-protein kinase catalytic domain	IPR_Domain	IPR001245	EXONT:000001,EXONT:000002,EXONT:000005,EXONT:001904,EXONT:001905,EXONT:001906,EXONT:001910,EXONT:001928,EXONT:001932,EXONT:001937,EXONT:001984,EXONT:001985,EXONT:001986,EXONT:001987,EXONT:001988,EXONT:001989,EXONT:001990,EXONT:001991,EXONT:001992,EXONT:001993,EXONT:001994,EXONT:001995,EXONT:001996,EXONT:001997,EXONT:001998,EXONT:001999,EXONT:002212,EXONT:002248,EXONT:002406
EXONT:002709	Malate dehydrogenase, active site	IPR_Site	IPR001252	EXONT:000001,EXONT:000002,EXONT:000018,EXONT:001912,EXONT:002015,EXONT:002710
EXONT:002710	Malate dehydrogenase activity	GO_molecular_function	GO:0016615	EXONT:000001,EXONT:000002,EXONT:001912,EXONT:002015
EXONT:002711	Peptidase S1	IPR_Domain	IPR001254	EXONT:000001,EXONT:000002,EXONT:001893,EXONT:001894,EXONT:001897,EXONT:001899,EXONT:001980,EXONT:001981,EXONT:002074,EXONT:002154
EXONT:002716	ArgE/DapE/ACY1/CPG2/YscS, conserved site	IPR_Site	IPR001261	EXONT:000001,EXONT:000002,EXONT:001893,EXONT:001894,EXONT:001897,EXONT:002024
EXONT:002720	NADH:ubiquinone oxidoreductase, 30kDa subunit	IPR_Domain	IPR001268	EXONT:000001,EXONT:000002,EXONT:001912,EXONT:002123,EXONT:002124,EXONT:002125,EXONT:002126,EXONT:002128
EXONT:002724	Oxidoreductase activity, acting on the CH-CH group of donors, quinone or related compound as acceptor	GO_molecular_function	GO:0016635	EXONT:000001,EXONT:000002,EXONT:001912,EXONT:002480
EXONT:002725	Dihydroorotate dehydrogenase activity	GO_molecular_function	GO:0004152	EXONT:000001,EXONT:000002,EXONT:001912,EXONT:002480,EXONT:002724
EXONT:002726	Dihydroorotate dehydrogenase, conserved site	IPR_Site	IPR001295	EXONT:000001,EXONT:000002,EXONT:001912,EXONT:002480,EXONT:002724,EXONT:002725
EXONT:002730	Calcium-dependent cysteine-type endopeptidase activity	GO_molecular_function	GO:0004198	EXONT:000001,EXONT:000002,EXONT:001893,EXONT:001894,EXONT:001897,EXONT:001898,EXONT:001899,EXONT:002064
EXONT:002731	Peptidase C2, calpain, catalytic domain	IPR_Domain	IPR001300	EXONT:000001,EXONT:000002,EXONT:001893,EXONT:001894,EXONT:001897,EXONT:001898,EXONT:001899,EXONT:002064,EXONT:002730
EXONT:002737	Sulfurtransferase activity	GO_molecular_function	GO:0016783	EXONT:000001,EXONT:000002,EXONT:001904,EXONT:002492
EXONT:002738	Thiosulfate sulfurtransferase activity	GO_molecular_function	GO:0004792	EXONT:000001,EXONT:000002,EXONT:001904,EXONT:002492,EXONT:002737
EXONT:002739	Thiosulphate sulfurtransferase, conserved site	IPR_Site	IPR001307	EXONT:000001,EXONT:000002,EXONT:001904,EXONT:002492,EXONT:002737,EXONT:002738
EXONT:002740	Peptidase C14, ICE, catalytic subunit p20	IPR_Domain	IPR001309	EXONT:000001,EXONT:000002,EXONT:001893,EXONT:001894,EXONT:001897,EXONT:001898,EXONT:001899,EXONT:002064
EXONT:002754	Pyridine nucleotide-disulphide oxidoreductase, NAD-binding domain	IPR_Domain	IPR001327	EXONT:000001,EXONT:000002,EXONT:000005,EXONT:001912,EXONT:001928,EXONT:001932,EXONT:001937,EXONT:001984,EXONT:001987,EXONT:001988,EXONT:001997,EXONT:002017,EXONT:002018,EXONT:002019
EXONT:002755	Prenyltransferase/squalene oxidase	IPR_Repeat	IPR001330	EXONT:000001,EXONT:000002,EXONT:000007,EXONT:000025,EXONT:000027
EXONT:002757	Guanylyltransferase activity	GO_molecular_function	GO:0070568	EXONT:000001,EXONT:000002,EXONT:001904,EXONT:001905,EXONT:002067
EXONT:002758	RNA guanylyltransferase activity	GO_molecular_function	GO:0008192	EXONT:000001,EXONT:000002,EXONT:001904,EXONT:001905,EXONT:002067,EXONT:002757
EXONT:002759	MRNA guanylyltransferase activity	GO_molecular_function	GO:0004484	EXONT:000001,EXONT:000002,EXONT:001904,EXONT:001905,EXONT:002067,EXONT:002757,EXONT:002758
EXONT:002760	MRNA capping enzyme	IPR_Domain	IPR001339	EXONT:000001,EXONT:000002,EXONT:001904,EXONT:001905,EXONT:002067,EXONT:002757,EXONT:002758,EXONT:002759
EXONT:002762	Phosphotransferase activity, carboxyl group as acceptor	GO_molecular_function	GO:0016774	EXONT:000001,EXONT:000002,EXONT:001904,EXONT:001905
EXONT:002765	Amino acid kinase activity	GO_molecular_function	GO:0019202	EXONT:000001,EXONT:000002,EXONT:001904,EXONT:001905,EXONT:001910
EXONT:002768	Phosphoglycerate/bisphosphoglycerate mutase, active site	IPR_Site	IPR001345	EXONT:000001,EXONT:000002,EXONT:000018
EXONT:002776	Adenosine/AMP deaminase domain	IPR_Domain	IPR001365	EXONT:000001,EXONT:000002,EXONT:002336
EXONT:002786	Peptidase S9, prolyl oligopeptidase, catalytic domain	IPR_Domain	IPR001375	EXONT:000001,EXONT:000002,EXONT:001893,EXONT:001894,EXONT:001897,EXONT:001980,EXONT:001981
EXONT:002794	Peptidase C19, ubiquitin carboxyl-terminal hydrolase	IPR_Domain	IPR001394	EXONT:000001,EXONT:000002,EXONT:000011,EXONT:001893,EXONT:002793,EXONT:002795
EXONT:002795	Ubiquitinyl hydrolase activity	GO_molecular_function	GO:0036459	EXONT:000001,EXONT:000002,EXONT:001893
EXONT:002796	Dynamin, GTPase domain	IPR_Domain	IPR001401	EXONT:000001,EXONT:000002,EXONT:000005,EXONT:001893,EXONT:001928,EXONT:001932,EXONT:001937,EXONT:001943,EXONT:001944,EXONT:001984,EXONT:001985,EXONT:001987,EXONT:001988,EXONT:001989,EXONT:001990,EXONT:001991,EXONT:001992,EXONT:001993,EXONT:001994,EXONT:001995,EXONT:001997,EXONT:001998,EXONT:002054,EXONT:002055,EXONT:002056,EXONT:002090,EXONT:002091,EXONT:002200
EXONT:002799	Aminoacyl-tRNA synthetase, class I, conserved site	IPR_Site	IPR001412	EXONT:000001,EXONT:000002,EXONT:000005,EXONT:001902,EXONT:001928,EXONT:001932,EXONT:001937,EXONT:001984,EXONT:001985,EXONT:001986,EXONT:001987,EXONT:001988,EXONT:001989,EXONT:001990,EXONT:001991,EXONT:001992,EXONT:001993,EXONT:001994,EXONT:001995,EXONT:001996,EXONT:001997,EXONT:001998,EXONT:001999,EXONT:002418,EXONT:002419,EXONT:002420
EXONT:002800	Lysophospholipase activity	GO_molecular_function	GO:0004622	EXONT:000001,EXONT:000002,EXONT:001893,EXONT:001957,EXONT:001958,EXONT:002802,EXONT:002803
EXONT:002801	Lysophospholipase patatin, conserved site	IPR_Site	IPR001423	EXONT:000001,EXONT:000002,EXONT:001893,EXONT:001957,EXONT:001958,EXONT:002800,EXONT:002802,EXONT:002803
EXONT:002802	Lipase activity	GO_molecular_function	GO:0016298	EXONT:000001,EXONT:000002,EXONT:001893,EXONT:001957
EXONT:002803	Phospholipase activity	GO_molecular_function	GO:0004620	EXONT:000001,EXONT:000002,EXONT:001893,EXONT:001957,EXONT:002802
EXONT:002805	Tyrosine-protein kinase, receptor class V, conserved site	IPR_Site	IPR001426	EXONT:000001,EXONT:000002,EXONT:000003,EXONT:000005,EXONT:000012,EXONT:001904,EXONT:001905,EXONT:001906,EXONT:001910,EXONT:001928,EXONT:001932,EXONT:001937,EXONT:001984,EXONT:001985,EXONT:001986,EXONT:001987,EXONT:001988,EXONT:001989,EXONT:001990,EXONT:001991,EXONT:001992,EXONT:001993,EXONT:001994,EXONT:001995,EXONT:001996,EXONT:001997,EXONT:001998,EXONT:001999,EXONT:002242,EXONT:002243,EXONT:002…
EXONT:002806	Transmembrane receptor protein tyrosine kinase activity	GO_molecular_function	GO:0004714	EXONT:000001,EXONT:000002,EXONT:000003,EXONT:000012,EXONT:001904,EXONT:001905,EXONT:001906,EXONT:001910,EXONT:002242,EXONT:002243,EXONT:002244,EXONT:002248,EXONT:002808
EXONT:002807	Ephrin receptor activity	GO_molecular_function	GO:0005003	EXONT:000001,EXONT:000002,EXONT:000003,EXONT:000012,EXONT:001904,EXONT:001905,EXONT:001906,EXONT:001910,EXONT:002242,EXONT:002243,EXONT:002244,EXONT:002248,EXONT:002806,EXONT:002808
EXONT:002808	Protein tyrosine kinase activity	GO_molecular_function	GO:0004713	EXONT:000001,EXONT:000002,EXONT:001904,EXONT:001905,EXONT:001906,EXONT:001910,EXONT:002248
EXONT:002809	Peptidase M16, zinc-binding site	IPR_Site	IPR001431	EXONT:000001,EXONT:000002,EXONT:000005,EXONT:001893,EXONT:001894,EXONT:001897,EXONT:001899,EXONT:002024,EXONT:002361
EXONT:002810	Oxidoreductase FAD/NAD(P)-binding	IPR_Domain	IPR001433	EXONT:000001,EXONT:000002,EXONT:001912
EXONT:002832	RNA-DNA hybrid ribonuclease activity	GO_molecular_function	GO:0004523	EXONT:000001,EXONT:000002,EXONT:001893,EXONT:001957,EXONT:002081,EXONT:002082,EXONT:002562,EXONT:002565,EXONT:002566,EXONT:002567
EXONT:002854	Methylated-DNA-[protein]-cysteine S-methyltransferase, active site	IPR_Site	IPR001497	EXONT:000001,EXONT:000002,EXONT:000018,EXONT:001904,EXONT:002438,EXONT:002439,EXONT:002855,EXONT:002856
EXONT:002855	S-methyltransferase activity	GO_molecular_function	GO:0008172	EXONT:000001,EXONT:000002,EXONT:001904,EXONT:002438,EXONT:002439
EXONT:002856	Methylated-DNA-[protein]-cysteine S-methyltransferase activity	GO_molecular_function	GO:0003908	EXONT:000001,EXONT:000002,EXONT:001904,EXONT:002438,EXONT:002439,EXONT:002855
EXONT:002861	Peptidase, metallopeptidase	IPR_Domain	IPR006026	EXONT:000001,EXONT:000002,EXONT:000005,EXONT:001893,EXONT:001894,EXONT:001897,EXONT:001937,EXONT:001938,EXONT:001939,EXONT:001940,EXONT:001941,EXONT:002024
EXONT:002862	Peptidase M12A, astacin	IPR_Domain	IPR001506	EXONT:000001,EXONT:000002,EXONT:000005,EXONT:001893,EXONT:001894,EXONT:001897,EXONT:001899,EXONT:001937,EXONT:001938,EXONT:001939,EXONT:001940,EXONT:001941,EXONT:002024,EXONT:002361,EXONT:002861
EXONT:002864	NAD-dependent epimerase/dehydratase	IPR_Domain	IPR001509	EXONT:000001,EXONT:000002,EXONT:000005,EXONT:002018,EXONT:002019
EXONT:002866	DNA-directed RNA polymerase, 30-40kDa subunit, conserved site	IPR_Site	IPR001514	EXONT:000001,EXONT:000002,EXONT:000005,EXONT:001904,EXONT:001905,EXONT:001928,EXONT:001929,EXONT:001930,EXONT:001932,EXONT:002067,EXONT:002072,EXONT:002408
EXONT:002868	Oxidoreductase activity, acting on paired donors, with oxidation of a pair of donors resulting in the reduction of molecular oxygen to two molecules of water	GO_molecular_function	GO:0016717	EXONT:000001,EXONT:000002,EXONT:001912,EXONT:002170
EXONT:002869	Acyl-CoA desaturase activity	GO_molecular_function	GO:0016215	EXONT:000001,EXONT:000002,EXONT:001912,EXONT:002170,EXONT:002868
EXONT:002870	Stearoyl-CoA 9-desaturase activity	GO_molecular_function	GO:0004768	EXONT:000001,EXONT:000002,EXONT:001912,EXONT:002170,EXONT:002868,EXONT:002869
EXONT:002871	Fatty acid desaturase, type 1, C-terminal	IPR_Site	IPR001522	EXONT:000001,EXONT:000002,EXONT:000005,EXONT:001912,EXONT:001937,EXONT:001938,EXONT:001939,EXONT:001940,EXONT:002170,EXONT:002255,EXONT:002868,EXONT:002869,EXONT:002870
EXONT:002876	Serine-type exopeptidase activity	GO_molecular_function	GO:0070008	EXONT:000001,EXONT:000002,EXONT:001893,EXONT:001894,EXONT:001897,EXONT:001980,EXONT:001981,EXONT:002026
EXONT:002877	N-methyltransferase activity	GO_molecular_function	GO:0008170	EXONT:000001,EXONT:000002,EXONT:001904,EXONT:002438,EXONT:002439
EXONT:002880	RNA methyltransferase activity	GO_molecular_function	GO:0008173	EXONT:000001,EXONT:000002,EXONT:001904,EXONT:002438,EXONT:002439
EXONT:002882	DNA-directed RNA polymerase, M/15kDa subunit	IPR_Domain	IPR001529	EXONT:000001,EXONT:000002,EXONT:000005,EXONT:001904,EXONT:001905,EXONT:001928,EXONT:001929,EXONT:001930,EXONT:001932,EXONT:002067,EXONT:002072,EXONT:002408
EXONT:002885	Phospholipase C activity	GO_molecular_function	GO:0004629	EXONT:000001,EXONT:000002,EXONT:001893,EXONT:001957,EXONT:002093,EXONT:002802,EXONT:002803,EXONT:002886
EXONT:002886	Phosphoric diester hydrolase activity	GO_molecular_function	GO:0008081	EXONT:000001,EXONT:000002,EXONT:001893,EXONT:001957,EXONT:002093
EXONT:002887	TRNA/rRNA methyltransferase, SpoU	IPR_Domain	IPR001537	EXONT:000001,EXONT:000002,EXONT:000005,EXONT:001904,EXONT:001928,EXONT:001929,EXONT:001932,EXONT:001948,EXONT:002438,EXONT:002439,EXONT:002880
EXONT:002895	Phosphoribosylglycinamide formyltransferase, active site	IPR_Site	IPR001555	EXONT:000001,EXONT:000002,EXONT:000018,EXONT:001904,EXONT:002438,EXONT:002439
EXONT:002901	Ubiquitin-specific protease activity	GO_molecular_function	GO:0004843	EXONT:000001,EXONT:000002,EXONT:001893,EXONT:001894,EXONT:001897,EXONT:001898,EXONT:002795,EXONT:002903
EXONT:002902	Peptidase C12, ubiquitin carboxyl-terminal hydrolase	IPR_Domain	IPR001578	EXONT:000001,EXONT:000002,EXONT:001893,EXONT:001894,EXONT:001897,EXONT:001898,EXONT:002795,EXONT:002901,EXONT:002903
EXONT:002903	Small conjugating protein-specific protease activity	GO_molecular_function	GO:0019783	EXONT:000001,EXONT:000002,EXONT:001893,EXONT:001894,EXONT:001897,EXONT:001898
EXONT:002904	Glycoside hydrolase, chitinase active site	IPR_Site	IPR001579	EXONT:000001,EXONT:000002,EXONT:000018,EXONT:001893,EXONT:001920,EXONT:002111
EXONT:002910	Peptidase M12B, ADAM/reprolysin	IPR_Domain	IPR001590	EXONT:000001,EXONT:000002,EXONT:001893,EXONT:001894,EXONT:001897,EXONT:001899,EXONT:002024,EXONT:002361
EXONT:002912	Aromatic amino acid beta-eliminating lyase/threonine aldolase	IPR_Domain	IPR001597	EXONT:000001,EXONT:000002,EXONT:000011,EXONT:002003,EXONT:002043
EXONT:002913	Transposase activity	GO_molecular_function	GO:0004803	EXONT:000001,EXONT:000002
EXONT:002915	Alpha-2-macroglobulin	IPR_Domain	IPR001599	EXONT:000001,EXONT:000002,EXONT:001887,EXONT:001888,EXONT:001889,EXONT:001890,EXONT:001893,EXONT:001894,EXONT:001895,EXONT:001896,EXONT:001897,EXONT:001899
EXONT:002916	DNA/RNA non-specific endonuclease	IPR_Domain	IPR001604	EXONT:000001,EXONT:000002,EXONT:000005,EXONT:001893,EXONT:001928,EXONT:001929,EXONT:001932,EXONT:001937,EXONT:001938,EXONT:001939
EXONT:002923	Myosin head, motor domain	IPR_Domain	IPR001609	EXONT:000001,EXONT:000002,EXONT:000005,EXONT:001893,EXONT:001928,EXONT:001932,EXONT:001937,EXONT:001943,EXONT:001944,EXONT:001984,EXONT:001985,EXONT:001986,EXONT:001987,EXONT:001988,EXONT:001989,EXONT:001990,EXONT:001991,EXONT:001992,EXONT:001993,EXONT:001994,EXONT:001995,EXONT:001996,EXONT:001997,EXONT:001998,EXONT:001999,EXONT:002054,EXONT:002055,EXONT:002924
EXONT:002924	Motor activity	GO_molecular_function	GO:0003774	EXONT:000001,EXONT:000002,EXONT:001893,EXONT:001943,EXONT:001944,EXONT:002054,EXONT:002055
EXONT:002948	Alcohol dehydrogenase, iron-type	IPR_Domain	IPR001670	EXONT:000001,EXONT:000002,EXONT:000005,EXONT:001912,EXONT:001937,EXONT:001938,EXONT:001939
EXONT:002950	Carbon-nitrogen ligase activity, with glutamine as amido-N-donor	GO_molecular_function	GO:0016884	EXONT:000001,EXONT:000002,EXONT:001902,EXONT:002342
EXONT:002951	GMP synthase (glutamine-hydrolyzing) activity	GO_molecular_function	GO:0003922	EXONT:000001,EXONT:000002,EXONT:001902,EXONT:002342,EXONT:002950
EXONT:002952	GMP synthase, C-terminal	IPR_Domain	IPR001674	EXONT:000001,EXONT:000002,EXONT:000005,EXONT:001902,EXONT:001928,EXONT:001932,EXONT:001937,EXONT:001984,EXONT:001985,EXONT:001986,EXONT:001987,EXONT:001988,EXONT:001989,EXONT:001990,EXONT:001991,EXONT:001992,EXONT:001993,EXONT:001994,EXONT:001995,EXONT:001996,EXONT:001997,EXONT:001998,EXONT:001999,EXONT:002342,EXONT:002950,EXONT:002951
EXONT:002962	Flavoprotein pyridine nucleotide cytochrome reductase	IPR_Domain	IPR001709	EXONT:000001,EXONT:000002,EXONT:001912,EXONT:002810
EXONT:002963	Phosphatidylinositol phospholipase C activity	GO_molecular_function	GO:0004435	EXONT:000001,EXONT:000002,EXONT:001893,EXONT:001957,EXONT:002093,EXONT:002802,EXONT:002803,EXONT:002885,EXONT:002886
EXONT:002964	Phospholipase C, phosphatidylinositol-specific, Y domain	IPR_Domain	IPR001711	EXONT:000001,EXONT:000002,EXONT:001893,EXONT:001957,EXONT:002093,EXONT:002802,EXONT:002803,EXONT:002885,EXONT:002886,EXONT:002963
EXONT:002968	UDP-glucose/GDP-mannose dehydrogenase, N-terminal	IPR_Domain	IPR001732	EXONT:000001,EXONT:000002,EXONT:000005,EXONT:000011,EXONT:001912,EXONT:001928,EXONT:001932,EXONT:001987,EXONT:001988,EXONT:001997,EXONT:002015,EXONT:002018,EXONT:002019,EXONT:002266,EXONT:002282,EXONT:002478
EXONT:002969	Phospholipase D/Transphosphatidylase	IPR_Domain	IPR001736	EXONT:000001,EXONT:000002
EXONT:002977	Kinesin, motor domain	IPR_Domain	IPR001752	EXONT:000001,EXONT:000002,EXONT:000005,EXONT:001885,EXONT:001893,EXONT:001928,EXONT:001932,EXONT:001937,EXONT:001943,EXONT:001944,EXONT:001984,EXONT:001985,EXONT:001986,EXONT:001987,EXONT:001988,EXONT:001989,EXONT:001990,EXONT:001991,EXONT:001992,EXONT:001993,EXONT:001994,EXONT:001995,EXONT:001996,EXONT:001997,EXONT:001998,EXONT:001999,EXONT:002054,EXONT:002055,EXONT:002614,EXONT:002615,EXONT:002…
EXONT:002978	Microtubule motor activity	GO_molecular_function	GO:0003777	EXONT:000001,EXONT:000002,EXONT:001893,EXONT:001943,EXONT:001944,EXONT:002054,EXONT:002055,EXONT:002924
EXONT:002979	Ribulose-phosphate binding barrel	IPR_Domain	IPR011060	EXONT:000001,EXONT:000002,EXONT:002130
EXONT:002980	Orotidine 5'-phosphate decarboxylase domain	IPR_Domain	IPR001754	EXONT:000001,EXONT:000002,EXONT:002003,EXONT:002004,EXONT:002117,EXONT:002130,EXONT:002979,EXONT:002981
EXONT:002981	Orotidine-5'-phosphate decarboxylase activity	GO_molecular_function	GO:0004590	EXONT:000001,EXONT:000002,EXONT:002003,EXONT:002004,EXONT:002117
EXONT:002987	Hint domain	IPR_Domain	IPR001767	EXONT:000001,EXONT:000002,EXONT:001893,EXONT:001894
EXONT:002999	Dihydrofolate reductase domain	IPR_Domain	IPR001796	EXONT:000001,EXONT:000002,EXONT:000011,EXONT:001912,EXONT:002998,EXONT:003000,EXONT:003001,EXONT:003002
EXONT:003000	Oxidoreductase activity, acting on the CH-NH group of donors	GO_molecular_function	GO:0016645	EXONT:000001,EXONT:000002,EXONT:001912
EXONT:003001	Oxidoreductase activity, acting on the CH-NH group of donors, NAD or NADP as acceptor	GO_molecular_function	GO:0016646	EXONT:000001,EXONT:000002,EXONT:001912,EXONT:003000
EXONT:003002	Dihydrofolate reductase activity	GO_molecular_function	GO:0004146	EXONT:000001,EXONT:000002,EXONT:001912,EXONT:003000,EXONT:003001
EXONT:003008	Peptidase M10, metallopeptidase	IPR_Domain	IPR001818	EXONT:000001,EXONT:000002,EXONT:000005,EXONT:001893,EXONT:001894,EXONT:001897,EXONT:001899,EXONT:001937,EXONT:001938,EXONT:001939,EXONT:001940,EXONT:001941,EXONT:002024,EXONT:002361,EXONT:002861
EXONT:003009	Tyrosine-protein kinase, receptor class III, conserved site	IPR_Site	IPR001824	EXONT:000001,EXONT:000002,EXONT:000003,EXONT:000005,EXONT:000012,EXONT:001904,EXONT:001905,EXONT:001906,EXONT:001910,EXONT:001928,EXONT:001932,EXONT:001937,EXONT:001984,EXONT:001985,EXONT:001986,EXONT:001987,EXONT:001988,EXONT:001989,EXONT:001990,EXONT:001991,EXONT:001992,EXONT:001993,EXONT:001994,EXONT:001995,EXONT:001996,EXONT:001997,EXONT:001998,EXONT:001999,EXONT:002242,EXONT:002243,EXONT:002…
EXONT:003020	Oxidoreductase activity, acting on a sulfur group of donors	GO_molecular_function	GO:0016667	EXONT:000001,EXONT:000002,EXONT:001912
EXONT:003021	Disulfide oxidoreductase activity	GO_molecular_function	GO:0015036	EXONT:000001,EXONT:000002,EXONT:001912,EXONT:003020
EXONT:003022	Protein disulfide oxidoreductase activity	GO_molecular_function	GO:0015035	EXONT:000001,EXONT:000002,EXONT:001912,EXONT:003020,EXONT:003021
EXONT:003023	DSBA-like thioredoxin domain	IPR_Domain	IPR001853	EXONT:000001,EXONT:000002,EXONT:001912,EXONT:003020,EXONT:003021,EXONT:003022
EXONT:003039	Carbon-oxygen lyase activity, acting on phosphates	GO_molecular_function	GO:0016838	EXONT:000001,EXONT:000002,EXONT:002003,EXONT:002078
EXONT:003045	Aminotransferase, class-II, pyridoxal-phosphate binding site	IPR_Site	IPR001917	EXONT:000001,EXONT:000002,EXONT:000005,EXONT:001904
EXONT:003052	Protein phosphatase 2C (PP2C)-like domain	IPR_Domain	IPR001932	EXONT:000001,EXONT:000002
EXONT:003053	Ras GTPase-activating protein	IPR_Domain	IPR001936	EXONT:000001,EXONT:000002,EXONT:000011,EXONT:001887,EXONT:001893,EXONT:001943,EXONT:001944,EXONT:002046,EXONT:002047,EXONT:002051,EXONT:002052,EXONT:002054,EXONT:002055,EXONT:002056,EXONT:002062
EXONT:003055	NADH:ubiquinone oxidoreductase, 51kDa subunit, conserved site	IPR_Site	IPR001949	EXONT:000001,EXONT:000002,EXONT:000005,EXONT:001912,EXONT:001928,EXONT:001932,EXONT:001937,EXONT:001984,EXONT:001987,EXONT:001988,EXONT:001992,EXONT:001994,EXONT:001997,EXONT:002018,EXONT:002019,EXONT:002123,EXONT:002124,EXONT:002125,EXONT:002126,EXONT:002128,EXONT:002205,EXONT:002206,EXONT:002207,EXONT:002658
EXONT:003061	Asparagine synthase	IPR_Domain	IPR001962	EXONT:000001,EXONT:000002,EXONT:000011,EXONT:001902,EXONT:002342,EXONT:002950,EXONT:003060,EXONT:003062
EXONT:003062	Asparagine synthase (glutamine-hydrolyzing) activity	GO_molecular_function	GO:0004066	EXONT:000001,EXONT:000002,EXONT:001902,EXONT:002342,EXONT:002950
EXONT:003065	Serine-type carboxypeptidase activity	GO_molecular_function	GO:0004185	EXONT:000001,EXONT:000002,EXONT:001893,EXONT:001894,EXONT:001897,EXONT:001980,EXONT:001981,EXONT:002026,EXONT:002467,EXONT:002876
EXONT:003067	Aspartic peptidase, active site	IPR_Site	IPR001969	EXONT:000001,EXONT:000002,EXONT:000018,EXONT:001893,EXONT:001894,EXONT:001897,EXONT:001899,EXONT:001925,EXONT:001927
EXONT:003070	RNA 3'-terminal phosphate cyclase/enolpyruvate transferase, alpha/beta	IPR_Domain	IPR013792	EXONT:000001,EXONT:000002
EXONT:003072	Transferase activity, transferring alkyl or aryl (other than methyl) groups	GO_molecular_function	GO:0016765	EXONT:000001,EXONT:000002,EXONT:001904
EXONT:003075	Peptidase A2A, retrovirus, catalytic	IPR_Domain	IPR001995	EXONT:000001,EXONT:000002,EXONT:001893,EXONT:001894,EXONT:001897,EXONT:001899,EXONT:001925,EXONT:001927
EXONT:003084	Tyrosine-protein kinase, receptor class II, conserved site	IPR_Site	IPR002011	EXONT:000001,EXONT:000002,EXONT:000003,EXONT:000005,EXONT:000012,EXONT:001904,EXONT:001905,EXONT:001906,EXONT:001910,EXONT:001928,EXONT:001932,EXONT:001937,EXONT:001984,EXONT:001985,EXONT:001986,EXONT:001987,EXONT:001988,EXONT:001989,EXONT:001990,EXONT:001991,EXONT:001992,EXONT:001993,EXONT:001994,EXONT:001995,EXONT:001996,EXONT:001997,EXONT:001998,EXONT:001999,EXONT:002242,EXONT:002243,EXONT:002…
EXONT:003086	Synaptojanin, N-terminal	IPR_Domain	IPR002013	EXONT:000001,EXONT:000002,EXONT:001893,EXONT:001957,EXONT:002093
EXONT:003102	DNA methylase, N-6 adenine-specific, conserved site	IPR_Site	IPR002052	EXONT:000001,EXONT:000002,EXONT:000005,EXONT:001904,EXONT:001928,EXONT:001929,EXONT:001932,EXONT:002438,EXONT:002439
EXONT:003103	DNA-directed DNA polymerase X	IPR_Domain	IPR002054	EXONT:000001,EXONT:000002,EXONT:000005,EXONT:001904,EXONT:001905,EXONT:001928,EXONT:001929,EXONT:001930,EXONT:001932,EXONT:002067,EXONT:002068,EXONT:002069
EXONT:003110	Thermonuclease active site	IPR_Site	IPR002071	EXONT:000001,EXONT:000002,EXONT:000005,EXONT:000018,EXONT:001893,EXONT:001928,EXONT:001929,EXONT:001932,EXONT:001957,EXONT:002081
EXONT:003113	3'5'-cyclic nucleotide phosphodiesterase, catalytic domain	IPR_Domain	IPR002073	EXONT:000001,EXONT:000002,EXONT:000011,EXONT:001893,EXONT:001957,EXONT:002093,EXONT:002886,EXONT:003112,EXONT:003114,EXONT:003115
EXONT:003114	Cyclic-nucleotide phosphodiesterase activity	GO_molecular_function	GO:0004112	EXONT:000001,EXONT:000002,EXONT:001893,EXONT:001957,EXONT:002093,EXONT:002886
EXONT:003115	3',5'-cyclic-nucleotide phosphodiesterase activity	GO_molecular_function	GO:0004114	EXONT:000001,EXONT:000002,EXONT:001893,EXONT:001957,EXONT:002093,EXONT:002886,EXONT:003114
EXONT:003124	Protein prenyltransferase, alpha subunit	IPR_Repeat	IPR002088	EXONT:000001,EXONT:000002,EXONT:000007,EXONT:000025,EXONT:000027,EXONT:001904,EXONT:003072,EXONT:003125,EXONT:003126
EXONT:003125	Prenyltransferase activity	GO_molecular_function	GO:0004659	EXONT:000001,EXONT:000002,EXONT:001904,EXONT:003072
EXONT:003126	Protein prenyltransferase activity	GO_molecular_function	GO:0008318	EXONT:000001,EXONT:000002,EXONT:001904,EXONT:003072,EXONT:003125
EXONT:003137	Glutaredoxin	IPR_Domain	IPR002109	EXONT:000001,EXONT:000002,EXONT:000004,EXONT:000013,EXONT:001912,EXONT:003020,EXONT:003021,EXONT:003022
EXONT:003145	Phospholipid/glycerol acyltransferase	IPR_Domain	IPR002123	EXONT:000001,EXONT:000002,EXONT:001904,EXONT:002032
EXONT:003146	CMP/dCMP deaminase, zinc-binding	IPR_Domain	IPR002125	EXONT:000001,EXONT:000002,EXONT:000005,EXONT:001893,EXONT:001937,EXONT:001938,EXONT:001939,EXONT:001940,EXONT:001941
EXONT:003150	Cis-trans isomerase activity	GO_molecular_function	GO:0016859	EXONT:000001,EXONT:000002,EXONT:002139
EXONT:003151	Peptidyl-prolyl cis-trans isomerase activity	GO_molecular_function	GO:0003755	EXONT:000001,EXONT:000002,EXONT:002139,EXONT:003150
EXONT:003152	Cyclophilin-like peptidyl-prolyl cis-trans isomerase domain	IPR_Domain	IPR002130	EXONT:000001,EXONT:000002,EXONT:002139,EXONT:003150,EXONT:003151
EXONT:003155	Peptidase C14, caspase non-catalytic subunit p10	IPR_Domain	IPR002138	EXONT:000001,EXONT:000002,EXONT:001893,EXONT:001894,EXONT:001897,EXONT:001898,EXONT:001899,EXONT:002064
EXONT:003159	Ribonuclease H domain	IPR_Domain	IPR002156	EXONT:000001,EXONT:000002,EXONT:000005,EXONT:001893,EXONT:001928,EXONT:001929,EXONT:001932,EXONT:001957,EXONT:002081,EXONT:002082,EXONT:002562,EXONT:002565,EXONT:002566,EXONT:002567,EXONT:002832,EXONT:002905
EXONT:003161	Lipase, GDXG, active site	IPR_Site	IPR002168	EXONT:000001,EXONT:000002,EXONT:000018,EXONT:001893
EXONT:003163	Carbohydrate/puine kinase, PfkB, conserved site	IPR_Site	IPR002173	EXONT:000001,EXONT:000002,EXONT:001904,EXONT:001905,EXONT:001906
EXONT:003171	Dihydroorotase, conserved site	IPR_Site	IPR002195	EXONT:000001,EXONT:000002,EXONT:001893,EXONT:002000,EXONT:002578
EXONT:003173	3-hydroxyisobutyrate dehydrogenase activity	GO_molecular_function	GO:0008442	EXONT:000001,EXONT:000002,EXONT:001912,EXONT:002015,EXONT:002266
EXONT:003174	3-hydroxyisobutyrate dehydrogenase-related, conserved site	IPR_Site	IPR002204	EXONT:000001,EXONT:000002,EXONT:001912,EXONT:002015,EXONT:002266,EXONT:003173
EXONT:003175	DNA topoisomerase, type IIA, subunit A/C-terminal	IPR_Domain	IPR002205	EXONT:000001,EXONT:000002,EXONT:000005,EXONT:001893,EXONT:001928,EXONT:001929,EXONT:001930,EXONT:001932,EXONT:001937,EXONT:001943,EXONT:001944,EXONT:001984,EXONT:001985,EXONT:001986,EXONT:001987,EXONT:001988,EXONT:001989,EXONT:001990,EXONT:001991,EXONT:001992,EXONT:001993,EXONT:001994,EXONT:001995,EXONT:001996,EXONT:001997,EXONT:001998,EXONT:001999,EXONT:002054,EXONT:002055,EXONT:002139,EXONT:002…
EXONT:003176	DNA topoisomerase activity	GO_molecular_function	GO:0003916	EXONT:000001,EXONT:000002,EXONT:002139
EXONT:003177	DNA topoisomerase II activity	GO_molecular_function	GO:0061505	EXONT:000001,EXONT:000002,EXONT:002139,EXONT:003176
EXONT:003178	DNA topoisomerase type II (ATP-hydrolyzing) activity	GO_molecular_function	GO:0003918	EXONT:000001,EXONT:000002,EXONT:001893,EXONT:001943,EXONT:001944,EXONT:002054,EXONT:002055,EXONT:002139,EXONT:002350,EXONT:002351,EXONT:002668,EXONT:003176,EXONT:003177
EXONT:003180	Proteinase inhibitor I2, Kunitz metazoa	IPR_Domain	IPR002223	EXONT:000001,EXONT:000002,EXONT:001887,EXONT:001888,EXONT:001889,EXONT:001890,EXONT:001893,EXONT:001894,EXONT:001895,EXONT:001896,EXONT:001897,EXONT:001899,EXONT:001980,EXONT:001981,EXONT:002074,EXONT:002502
EXONT:003181	3-beta hydroxysteroid dehydrogenase/isomerase	IPR_Domain	IPR002225	EXONT:000001,EXONT:000002,EXONT:000011,EXONT:001912,EXONT:002015,EXONT:002266,EXONT:002478,EXONT:003182,EXONT:003183,EXONT:003184
EXONT:003182	Steroid dehydrogenase activity	GO_molecular_function	GO:0016229	EXONT:000001,EXONT:000002,EXONT:001912
EXONT:003183	Steroid dehydrogenase activity, acting on the CH-OH group of donors, NAD or NADP as acceptor	GO_molecular_function	GO:0033764	EXONT:000001,EXONT:000002,EXONT:001912,EXONT:002015,EXONT:002266,EXONT:003182
EXONT:003184	3-beta-hydroxy-delta5-steroid dehydrogenase activity	GO_molecular_function	GO:0003854	EXONT:000001,EXONT:000002,EXONT:001912,EXONT:002015,EXONT:002266,EXONT:003182,EXONT:003183
EXONT:003186	Tyrosinase	IPR_Domain	IPR002227	EXONT:000001,EXONT:000002,EXONT:000011,EXONT:001912,EXONT:002509
EXONT:003188	Serine/threonine- /dual specificity protein kinase, catalytic domain	IPR_Domain	IPR002290	EXONT:000001,EXONT:000002,EXONT:000005,EXONT:001904,EXONT:001905,EXONT:001906,EXONT:001910,EXONT:001928,EXONT:001932,EXONT:001937,EXONT:001984,EXONT:001985,EXONT:001986,EXONT:001987,EXONT:001988,EXONT:001989,EXONT:001990,EXONT:001991,EXONT:001992,EXONT:001993,EXONT:001994,EXONT:001995,EXONT:001996,EXONT:001997,EXONT:001998,EXONT:001999,EXONT:002212,EXONT:002248,EXONT:002406
EXONT:003189	Aminoacyl-tRNA synthetase, class Ia	IPR_Domain	IPR002300	EXONT:000001,EXONT:000002,EXONT:000005,EXONT:001902,EXONT:001928,EXONT:001932,EXONT:001937,EXONT:001984,EXONT:001985,EXONT:001986,EXONT:001987,EXONT:001988,EXONT:001989,EXONT:001990,EXONT:001991,EXONT:001992,EXONT:001993,EXONT:001994,EXONT:001995,EXONT:001996,EXONT:001997,EXONT:001998,EXONT:001999,EXONT:002418,EXONT:002419,EXONT:002420
EXONT:003190	Aminoacyl-tRNA synthetase, class II (G/ H/ P/ S), conserved domain	IPR_Domain	IPR002314	EXONT:000001,EXONT:000002,EXONT:000005,EXONT:001902,EXONT:001928,EXONT:001932,EXONT:001937,EXONT:001984,EXONT:001985,EXONT:001986,EXONT:001987,EXONT:001988,EXONT:001989,EXONT:001990,EXONT:001991,EXONT:001992,EXONT:001993,EXONT:001994,EXONT:001995,EXONT:001996,EXONT:001997,EXONT:001998,EXONT:001999,EXONT:002418,EXONT:002419,EXONT:002420
EXONT:003192	Phenylalanyl-tRNA synthetase	IPR_Domain	IPR002319	EXONT:000001,EXONT:000002,EXONT:000005,EXONT:001902,EXONT:001928,EXONT:001929,EXONT:001932,EXONT:001937,EXONT:001948,EXONT:001984,EXONT:001985,EXONT:001986,EXONT:001987,EXONT:001988,EXONT:001989,EXONT:001990,EXONT:001991,EXONT:001992,EXONT:001993,EXONT:001994,EXONT:001995,EXONT:001996,EXONT:001997,EXONT:001998,EXONT:001999,EXONT:002418,EXONT:002419,EXONT:002420,EXONT:003191
EXONT:003193	Alcohol dehydrogenase, zinc-type, conserved site	IPR_Site	IPR002328	EXONT:000001,EXONT:000002,EXONT:000005,EXONT:001912,EXONT:001937,EXONT:001938,EXONT:001939,EXONT:001940,EXONT:001941
EXONT:003195	FAD-binding, type 2	IPR_Domain	IPR016166	EXONT:000001,EXONT:000002,EXONT:000005,EXONT:001912,EXONT:001928,EXONT:001932,EXONT:001937,EXONT:001984,EXONT:001987,EXONT:001988,EXONT:001997,EXONT:002015,EXONT:002017,EXONT:002018,EXONT:002019
EXONT:003196	Molybdopterin dehydrogenase, FAD-binding	IPR_Domain	IPR002346	EXONT:000001,EXONT:000002,EXONT:000005,EXONT:001912,EXONT:001928,EXONT:001932,EXONT:001937,EXONT:001984,EXONT:001987,EXONT:001988,EXONT:001997,EXONT:002015,EXONT:002017,EXONT:002018,EXONT:002019,EXONT:003195
EXONT:003206	Quinone oxidoreductase/zeta-crystallin, conserved site	IPR_Site	IPR002364	EXONT:000001,EXONT:000002,EXONT:000005,EXONT:001912,EXONT:001937,EXONT:001938,EXONT:001939,EXONT:001940,EXONT:001941
EXONT:003207	Intramolecular transferase activity	GO_molecular_function	GO:0016866	EXONT:000001,EXONT:000002,EXONT:002139
EXONT:003208	Terpene synthase, conserved site	IPR_Site	IPR002365	EXONT:000001,EXONT:000002,EXONT:002139,EXONT:003207
EXONT:003212	Hydroxymethyl-, formyl- and related transferase activity	GO_molecular_function	GO:0016742	EXONT:000001,EXONT:000002,EXONT:001904,EXONT:002438
EXONT:003213	Formyl transferase, N-terminal	IPR_Domain	IPR002376	EXONT:000001,EXONT:000002,EXONT:001904,EXONT:002438,EXONT:003212
EXONT:003222	Cytochrome-c oxidase activity	GO_molecular_function	GO:0004129	EXONT:000001,EXONT:000002,EXONT:000004,EXONT:000013,EXONT:001912,EXONT:002141,EXONT:002363,EXONT:002384,EXONT:002385,EXONT:002386,EXONT:002392,EXONT:002395,EXONT:003214,EXONT:003215,EXONT:003223,EXONT:003224
EXONT:003223	Oxidoreductase activity, acting on a heme group of donors	GO_molecular_function	GO:0016675	EXONT:000001,EXONT:000002,EXONT:001912
EXONT:003224	Oxidoreductase activity, acting on a heme group of donors, oxygen as acceptor	GO_molecular_function	GO:0016676	EXONT:000001,EXONT:000002,EXONT:001912,EXONT:003223
EXONT:003225	DNA/RNA helicase, ATP-dependent, DEAH-box type, conserved site	IPR_Site	IPR002464	EXONT:000001,EXONT:000002,EXONT:000005,EXONT:001893,EXONT:001928,EXONT:001929,EXONT:001932,EXONT:001937,EXONT:001943,EXONT:001944,EXONT:001984,EXONT:001985,EXONT:001986,EXONT:001987,EXONT:001988,EXONT:001989,EXONT:001990,EXONT:001991,EXONT:001992,EXONT:001993,EXONT:001994,EXONT:001995,EXONT:001996,EXONT:001997,EXONT:001998,EXONT:001999,EXONT:002054,EXONT:002055,EXONT:002333,EXONT:002350,EXONT:002…
EXONT:003226	Adenosine deaminase/editase	IPR_Domain	IPR002466	EXONT:000001,EXONT:000002,EXONT:000005,EXONT:001893,EXONT:001928,EXONT:001929,EXONT:001932,EXONT:001948,EXONT:002000,EXONT:002336,EXONT:002337,EXONT:002339
EXONT:003228	Peptidase S9, serine active site	IPR_Site	IPR002471	EXONT:000001,EXONT:000002,EXONT:000018,EXONT:001893,EXONT:001894,EXONT:001897,EXONT:001899,EXONT:001980,EXONT:001981,EXONT:002074
EXONT:003238	Transposase, Tc1-like	IPR_Domain	IPR002492	EXONT:000001,EXONT:000002,EXONT:000005,EXONT:001928,EXONT:001929,EXONT:001930,EXONT:001932,EXONT:002913
EXONT:003239	Cyclohydrolase activity	GO_molecular_function	GO:0019238	EXONT:000001,EXONT:000002,EXONT:001893,EXONT:002000,EXONT:002339
EXONT:003242	Phosphatidylinositol phosphate kinase activity	GO_molecular_function	GO:0016307	EXONT:000001,EXONT:000002,EXONT:001904,EXONT:001905,EXONT:001906,EXONT:001910
EXONT:003243	Phosphatidylinositol-4-phosphate 5-kinase, core	IPR_Domain	IPR002498	EXONT:000001,EXONT:000002,EXONT:001904,EXONT:001905,EXONT:001906,EXONT:001910,EXONT:003242
EXONT:003245	Phosphoadenosine phosphosulphate reductase	IPR_Domain	IPR002500	EXONT:000001,EXONT:000002,EXONT:000011,EXONT:003060
EXONT:003246	Hydrolase activity, acting on carbon-nitrogen (but not peptide) bonds, in linear amides	GO_molecular_function	GO:0016811	EXONT:000001,EXONT:000002,EXONT:001893,EXONT:002000
EXONT:003247	N-acetylmuramoyl-L-alanine amidase activity	GO_molecular_function	GO:0008745	EXONT:000001,EXONT:000002,EXONT:001893,EXONT:002000,EXONT:003246
EXONT:003248	N-acetylmuramoyl-L-alanine amidase domain	IPR_Domain	IPR002502	EXONT:000001,EXONT:000002,EXONT:001893,EXONT:002000,EXONT:003246,EXONT:003247
EXONT:003251	Polysaccharide deacetylase	IPR_Domain	IPR002509	EXONT:000001,EXONT:000002,EXONT:001893,EXONT:002000,EXONT:002327
EXONT:003260	Fumarylacetoacetase, C-terminal	IPR_Domain	IPR002529	EXONT:000001,EXONT:000002,EXONT:003261
EXONT:003261	Fumarylacetoacetase, C-terminal-related	IPR_Domain	IPR011234	EXONT:000001,EXONT:000002
EXONT:003284	3'-5' exonuclease domain	IPR_Domain	IPR002562	EXONT:000001,EXONT:000002,EXONT:000005,EXONT:001893,EXONT:001928,EXONT:001929,EXONT:001932,EXONT:001957,EXONT:002081,EXONT:002905,EXONT:003285,EXONT:003286
EXONT:003285	Exonuclease activity	GO_molecular_function	GO:0004527	EXONT:000001,EXONT:000002,EXONT:001893,EXONT:001957,EXONT:002081
EXONT:003286	3'-5' exonuclease activity	GO_molecular_function	GO:0008408	EXONT:000001,EXONT:000002,EXONT:001893,EXONT:001957,EXONT:002081,EXONT:003285
EXONT:003288	FMN-binding split barrel	IPR_Domain	IPR012349	EXONT:000001,EXONT:000002,EXONT:000005,EXONT:001912,EXONT:001928,EXONT:001932,EXONT:001937,EXONT:001984,EXONT:001987,EXONT:001988,EXONT:001992,EXONT:001994,EXONT:001997,EXONT:002018,EXONT:002019,EXONT:002658
EXONT:003290	Oxidoreductase activity, acting on a sulfur group of donors, disulfide as acceptor	GO_molecular_function	GO:0016671	EXONT:000001,EXONT:000002,EXONT:001912,EXONT:003020
EXONT:003291	Peptide-methionine (S)-S-oxide reductase activity	GO_molecular_function	GO:0008113	EXONT:000001,EXONT:000002,EXONT:001912,EXONT:003020,EXONT:003290
EXONT:003292	Peptide methionine sulphoxide reductase MsrA	IPR_Domain	IPR002569	EXONT:000001,EXONT:000002,EXONT:001912,EXONT:003020,EXONT:003290,EXONT:003291
EXONT:003294	Aminoglycoside phosphotransferase	IPR_Domain	IPR002575	EXONT:000001,EXONT:000002,EXONT:001904,EXONT:001905,EXONT:002212
EXONT:003297	Peptide methionine sulphoxide reductase MrsB	IPR_Domain	IPR002579	EXONT:000001,EXONT:000002,EXONT:000011,EXONT:001912,EXONT:003020,EXONT:003290,EXONT:003296,EXONT:003298
EXONT:003298	Peptide-methionine (R)-S-oxide reductase activity	GO_molecular_function	GO:0033743	EXONT:000001,EXONT:000002,EXONT:001912,EXONT:003020,EXONT:003290
EXONT:003314	Quinolinate phosphoribosyl transferase, C-terminal	IPR_Domain	IPR002638	EXONT:000001,EXONT:000002,EXONT:001904,EXONT:002041,EXONT:002130,EXONT:003315,EXONT:003316
EXONT:003315	Transferase activity, transferring pentosyl groups	GO_molecular_function	GO:0016763	EXONT:000001,EXONT:000002,EXONT:001904,EXONT:002041
EXONT:003316	Nicotinate-nucleotide diphosphorylase (carboxylating) activity	GO_molecular_function	GO:0004514	EXONT:000001,EXONT:000002,EXONT:001904,EXONT:002041,EXONT:003315
EXONT:003318	Lysophospholipase, catalytic domain	IPR_Domain	IPR002642	EXONT:000001,EXONT:000002,EXONT:000011,EXONT:001893,EXONT:001957,EXONT:002695,EXONT:002802,EXONT:002803
EXONT:003320	Poly A polymerase, head domain	IPR_Domain	IPR002646	EXONT:000001,EXONT:000002,EXONT:000005,EXONT:001904,EXONT:001905,EXONT:001928,EXONT:001929,EXONT:001932,EXONT:001948,EXONT:002067
EXONT:003321	Adenylyltransferase activity	GO_molecular_function	GO:0070566	EXONT:000001,EXONT:000002,EXONT:001904,EXONT:001905,EXONT:002067
EXONT:003322	Sulfate adenylyltransferase activity	GO_molecular_function	GO:0004779	EXONT:000001,EXONT:000002,EXONT:001904,EXONT:001905,EXONT:002067,EXONT:003321
EXONT:003323	Sulfate adenylyltransferase (ATP) activity	GO_molecular_function	GO:0004781	EXONT:000001,EXONT:000002,EXONT:001904,EXONT:001905,EXONT:002067,EXONT:003321,EXONT:003322
EXONT:003324	Sulphate adenylyltransferase	IPR_Domain	IPR002650	EXONT:000001,EXONT:000002,EXONT:001904,EXONT:001905,EXONT:002067,EXONT:003321,EXONT:003322,EXONT:003323
EXONT:003327	Oxidoreductase activity, acting on the CH-CH group of donors, oxygen as acceptor	GO_molecular_function	GO:0016634	EXONT:000001,EXONT:000002,EXONT:001912,EXONT:002480
EXONT:003328	Acyl-CoA oxidase activity	GO_molecular_function	GO:0003997	EXONT:000001,EXONT:000002,EXONT:001912,EXONT:002480,EXONT:003327
EXONT:003329	Acyl-CoA oxidase, C-terminal	IPR_Domain	IPR002655	EXONT:000001,EXONT:000002,EXONT:001912,EXONT:002480,EXONT:003327,EXONT:003328
EXONT:003347	HNH endonuclease	IPR_Domain	IPR002711	EXONT:000001,EXONT:000002,EXONT:000005,EXONT:000011,EXONT:001893,EXONT:001928,EXONT:001929,EXONT:001932,EXONT:001957,EXONT:002081,EXONT:002082,EXONT:003346
EXONT:003351	MOZ/SAS-like protein	IPR_Domain	IPR002717	EXONT:000001,EXONT:000002,EXONT:001904,EXONT:002032,EXONT:002033
EXONT:003356	Ribonuclease P/MRP, subunit p29	IPR_Domain	IPR002730	EXONT:000001,EXONT:000002,EXONT:000005,EXONT:000011,EXONT:001893,EXONT:001928,EXONT:001929,EXONT:001932,EXONT:001948,EXONT:001957,EXONT:002081,EXONT:002562,EXONT:003355
EXONT:003380	Aspartate dehydrogenase	IPR_Domain	IPR002811	EXONT:000001,EXONT:000002,EXONT:001912
EXONT:003395	Peptidase M12B, propeptide	IPR_Domain	IPR002870	EXONT:000001,EXONT:000002,EXONT:000005,EXONT:001893,EXONT:001894,EXONT:001897,EXONT:001899,EXONT:001937,EXONT:001938,EXONT:001939,EXONT:001940,EXONT:001941,EXONT:002024,EXONT:002361
EXONT:003399	Ribosomal RNA methyltransferase FtsJ domain	IPR_Domain	IPR002877	EXONT:000001,EXONT:000002,EXONT:001904,EXONT:002438,EXONT:002439
EXONT:003404	Proprotein convertase, P	IPR_Domain	IPR002884	EXONT:000001,EXONT:000002,EXONT:001893,EXONT:001894,EXONT:001897,EXONT:001899,EXONT:001980,EXONT:001981,EXONT:002074
EXONT:003406	[2Fe-2S]-binding	IPR_Domain	IPR002888	EXONT:000001,EXONT:000002,EXONT:000005,EXONT:001912,EXONT:001937,EXONT:001938,EXONT:001939
EXONT:003408	Alpha-2-macroglobulin, N-terminal	IPR_Domain	IPR002890	EXONT:000001,EXONT:000002,EXONT:001887,EXONT:001888,EXONT:001889,EXONT:001890,EXONT:001893,EXONT:001894,EXONT:001895,EXONT:001896,EXONT:001897,EXONT:001899
EXONT:003425	Dienelactone hydrolase	IPR_Domain	IPR002925	EXONT:000001,EXONT:000002,EXONT:001893
EXONT:003426	Myosin tail	IPR_Domain	IPR002928	EXONT:000001,EXONT:000002,EXONT:001893,EXONT:001943,EXONT:001944,EXONT:002054,EXONT:002055,EXONT:002924
EXONT:003429	Oxidoreductase activity, acting on the CH-NH2 group of donors	GO_molecular_function	GO:0016638	EXONT:000001,EXONT:000002,EXONT:001912
EXONT:003431	Nucleotidyl transferase domain	IPR_Domain	IPR002934	EXONT:000001,EXONT:000002,EXONT:001904,EXONT:001905,EXONT:002067
EXONT:003432	Amine oxidase	IPR_Domain	IPR002937	EXONT:000001,EXONT:000002,EXONT:001912
EXONT:003433	Aromatic-ring hydroxylase-like	IPR_Domain	IPR003042	EXONT:000001,EXONT:000002,EXONT:001912
EXONT:003434	Monooxygenase, FAD-binding	IPR_Domain	IPR002938	EXONT:000001,EXONT:000002,EXONT:001912,EXONT:003433
EXONT:003443	Carbon-nitrogen hydrolase	IPR_Domain	IPR003010	EXONT:000001,EXONT:000002,EXONT:001893,EXONT:002000
EXONT:003462	FAD-binding, type 1	IPR_Domain	IPR003097	EXONT:000001,EXONT:000002,EXONT:001912,EXONT:003463,EXONT:003464
EXONT:003463	Ferredoxin reductase-type FAD-binding domain	IPR_Domain	IPR017927	EXONT:000001,EXONT:000002,EXONT:001912,EXONT:003464
EXONT:003464	Riboflavin synthase-like beta-barrel	IPR_Domain	IPR017938	EXONT:000001,EXONT:000002,EXONT:001912
EXONT:003478	GoLoco motif	IPR_Site	IPR003109	EXONT:000001,EXONT:000002,EXONT:001887,EXONT:001893,EXONT:001943,EXONT:001944,EXONT:002051,EXONT:002052,EXONT:002054,EXONT:002055,EXONT:002056
EXONT:003480	ATP-dependent peptidase activity	GO_molecular_function	GO:0004176	EXONT:000001,EXONT:000002,EXONT:001893,EXONT:001894,EXONT:001897,EXONT:001943,EXONT:001944,EXONT:002054,EXONT:002055,EXONT:002350,EXONT:002351
EXONT:003481	Peptidase S16, lon N-terminal	IPR_Domain	IPR003111	EXONT:000001,EXONT:000002,EXONT:001893,EXONT:001894,EXONT:001897,EXONT:001943,EXONT:001944,EXONT:002054,EXONT:002055,EXONT:002350,EXONT:002351,EXONT:003480
EXONT:003495	Zinc finger, N-recognin	IPR_Domain	IPR003126	EXONT:000001,EXONT:000002,EXONT:000005,EXONT:001904,EXONT:001937,EXONT:001938,EXONT:001939,EXONT:001940,EXONT:001941,EXONT:002302
EXONT:003499	Dynamin GTPase effector	IPR_Domain	IPR003130	EXONT:000001,EXONT:000002,EXONT:000005,EXONT:000011,EXONT:001893,EXONT:001928,EXONT:001932,EXONT:001937,EXONT:001943,EXONT:001944,EXONT:001984,EXONT:001985,EXONT:001987,EXONT:001988,EXONT:001989,EXONT:001990,EXONT:001991,EXONT:001992,EXONT:001993,EXONT:001994,EXONT:001995,EXONT:001997,EXONT:001998,EXONT:002054,EXONT:002055,EXONT:002056,EXONT:002090,EXONT:002091,EXONT:002200,EXONT:003498
EXONT:003510	Phospholipase/carboxylesterase/thioesterase	IPR_Domain	IPR003140	EXONT:000001,EXONT:000002,EXONT:001893
EXONT:003513	Polymerase/histidinol phosphatase-like	IPR_Domain	IPR016195	EXONT:000001,EXONT:000002
EXONT:003518	Proteinase inhibitor, carboxypeptidase propeptide	IPR_Domain	IPR003146	EXONT:000001,EXONT:000002,EXONT:000011,EXONT:001893,EXONT:001894,EXONT:001897,EXONT:002026,EXONT:002467,EXONT:003517
EXONT:003528	Glycoside hydrolase-type carbohydrate-binding, subgroup	IPR_Domain	IPR014718	EXONT:000001,EXONT:000002,EXONT:000005,EXONT:002116,EXONT:003530
EXONT:003530	Galactose mutarotase-like domain	IPR_Domain	IPR011013	EXONT:000001,EXONT:000002,EXONT:000005,EXONT:002116
EXONT:003549	Guanylate-binding protein, C-terminal	IPR_Domain	IPR003191	EXONT:000001,EXONT:000002,EXONT:000005,EXONT:001893,EXONT:001928,EXONT:001932,EXONT:001937,EXONT:001943,EXONT:001944,EXONT:001984,EXONT:001985,EXONT:001987,EXONT:001988,EXONT:001989,EXONT:001990,EXONT:001991,EXONT:001992,EXONT:001993,EXONT:001994,EXONT:001995,EXONT:001997,EXONT:001998,EXONT:002054,EXONT:002055,EXONT:002056,EXONT:002090,EXONT:002091,EXONT:002200
EXONT:003554	Cobalamin (vitamin B12)-dependent enzyme, catalytic	IPR_Domain	IPR016176	EXONT:000001,EXONT:000002,EXONT:000005,EXONT:001928,EXONT:001932,EXONT:001988,EXONT:002211,EXONT:002678,EXONT:003556
EXONT:003563	DNA glycosylase	IPR_Domain	IPR011257	EXONT:000001,EXONT:000002
EXONT:003564	HhH-GPD domain	IPR_Domain	IPR003265	EXONT:000001,EXONT:000002,EXONT:003563
EXONT:003574	Transferase activity, transferring hexosyl groups	GO_molecular_function	GO:0016758	EXONT:000001,EXONT:000002,EXONT:001904,EXONT:002041
EXONT:003589	Mannosyltransferase activity	GO_molecular_function	GO:0000030	EXONT:000001,EXONT:000002,EXONT:001904,EXONT:002041,EXONT:003574
EXONT:003590	Glycosyl transferase, family 39	IPR_Domain	IPR003342	EXONT:000001,EXONT:000002,EXONT:001904,EXONT:002041,EXONT:003574,EXONT:003589
EXONT:003611	Endodeoxyribonuclease activity, producing 5'-phosphomonoesters	GO_molecular_function	GO:0016888	EXONT:000001,EXONT:000002,EXONT:001893,EXONT:001957,EXONT:002081,EXONT:002082,EXONT:002083,EXONT:002084,EXONT:002567
EXONT:003618	Flavoprotein	IPR_Domain	IPR003382	EXONT:000001,EXONT:000002
EXONT:003630	Dehydrogenase, multihelical	IPR_Domain	IPR013328	EXONT:000001,EXONT:000002,EXONT:000005,EXONT:000011,EXONT:001912,EXONT:002015,EXONT:002018,EXONT:002019,EXONT:002266,EXONT:003629
EXONT:003633	ABC transporter-like	IPR_Domain	IPR003439	EXONT:000001,EXONT:000002,EXONT:000005,EXONT:000011,EXONT:001893,EXONT:001928,EXONT:001932,EXONT:001937,EXONT:001943,EXONT:001944,EXONT:001984,EXONT:001985,EXONT:001986,EXONT:001987,EXONT:001988,EXONT:001989,EXONT:001990,EXONT:001991,EXONT:001992,EXONT:001993,EXONT:001994,EXONT:001995,EXONT:001996,EXONT:001997,EXONT:001998,EXONT:001999,EXONT:002054,EXONT:002055,EXONT:002271,EXONT:002272,EXONT:002…
EXONT:003654	Receptor signaling protein serine/threonine kinase activity	GO_molecular_function	GO:0004702	EXONT:000001,EXONT:000002,EXONT:000003,EXONT:000012,EXONT:001904,EXONT:001905,EXONT:001906,EXONT:001910,EXONT:002248,EXONT:002249,EXONT:002370
EXONT:003655	MAP kinase activity	GO_molecular_function	GO:0004707	EXONT:000001,EXONT:000002,EXONT:000003,EXONT:000012,EXONT:001904,EXONT:001905,EXONT:001906,EXONT:001910,EXONT:002248,EXONT:002249,EXONT:002370,EXONT:003654
EXONT:003656	Mitogen-activated protein (MAP) kinase, conserved site	IPR_Site	IPR003527	EXONT:000001,EXONT:000002,EXONT:000003,EXONT:000005,EXONT:000012,EXONT:001904,EXONT:001905,EXONT:001906,EXONT:001910,EXONT:001928,EXONT:001932,EXONT:001937,EXONT:001984,EXONT:001985,EXONT:001986,EXONT:001987,EXONT:001988,EXONT:001989,EXONT:001990,EXONT:001991,EXONT:001992,EXONT:001993,EXONT:001994,EXONT:001995,EXONT:001996,EXONT:001997,EXONT:001998,EXONT:001999,EXONT:002248,EXONT:002249,EXONT:002…
EXONT:003675	Protein-tyrosine phosphatase, catalytic	IPR_Domain	IPR003595	EXONT:000001,EXONT:000002,EXONT:001893,EXONT:001957,EXONT:002093,EXONT:002094,EXONT:002095,EXONT:002105,EXONT:002106,EXONT:002107
EXONT:003681	DNA topoisomerase, type IA, domain 2	IPR_Domain	IPR003601	EXONT:000001,EXONT:000002,EXONT:000005,EXONT:001928,EXONT:001929,EXONT:001930,EXONT:001932,EXONT:002139,EXONT:003176
EXONT:003682	DNA topoisomerase, type IA, DNA-binding	IPR_Domain	IPR003602	EXONT:000001,EXONT:000002,EXONT:000005,EXONT:001928,EXONT:001929,EXONT:001930,EXONT:001932,EXONT:002139,EXONT:003176
EXONT:003684	TGF beta receptor, GS motif	IPR_Domain	IPR003605	EXONT:000001,EXONT:000002,EXONT:000003,EXONT:000005,EXONT:000012,EXONT:001904,EXONT:001905,EXONT:001906,EXONT:001910,EXONT:001928,EXONT:001932,EXONT:001937,EXONT:001984,EXONT:001985,EXONT:001986,EXONT:001987,EXONT:001988,EXONT:001989,EXONT:001990,EXONT:001991,EXONT:001992,EXONT:001993,EXONT:001994,EXONT:001995,EXONT:001996,EXONT:001997,EXONT:001998,EXONT:001999,EXONT:002242,EXONT:002243,EXONT:002…
EXONT:003685	Pre-SET zinc-binding sub-group	IPR_Domain	IPR003606	EXONT:000001,EXONT:000002,EXONT:000005,EXONT:001904,EXONT:001937,EXONT:001938,EXONT:001939,EXONT:001940,EXONT:001941,EXONT:002438,EXONT:002439,EXONT:002440,EXONT:002877,EXONT:003686,EXONT:003687,EXONT:003688,EXONT:003689,EXONT:003690,EXONT:003691
EXONT:003686	Pre-SET domain	IPR_Domain	IPR007728	EXONT:000001,EXONT:000002,EXONT:000005,EXONT:001904,EXONT:001937,EXONT:001938,EXONT:001939,EXONT:001940,EXONT:001941,EXONT:002438,EXONT:002439,EXONT:002440,EXONT:002877,EXONT:003687,EXONT:003688,EXONT:003689,EXONT:003690,EXONT:003691
EXONT:003687	Protein methyltransferase activity	GO_molecular_function	GO:0008276	EXONT:000001,EXONT:000002,EXONT:001904,EXONT:002438,EXONT:002439
EXONT:003688	Protein-lysine N-methyltransferase activity	GO_molecular_function	GO:0016279	EXONT:000001,EXONT:000002,EXONT:001904,EXONT:002438,EXONT:002439,EXONT:002440,EXONT:002877,EXONT:003687,EXONT:003691
EXONT:003689	Histone-lysine N-methyltransferase activity	GO_molecular_function	GO:0018024	EXONT:000001,EXONT:000002,EXONT:001904,EXONT:002438,EXONT:002439,EXONT:002440,EXONT:002877,EXONT:003687,EXONT:003688,EXONT:003690,EXONT:003691
EXONT:003690	Histone methyltransferase activity	GO_molecular_function	GO:0042054	EXONT:000001,EXONT:000002,EXONT:001904,EXONT:002438,EXONT:002439,EXONT:003687
EXONT:003691	Lysine N-methyltransferase activity	GO_molecular_function	GO:0016278	EXONT:000001,EXONT:000002,EXONT:001904,EXONT:002438,EXONT:002439,EXONT:002440,EXONT:002877
EXONT:003694	U box domain	IPR_Domain	IPR003613	EXONT:000001,EXONT:000002,EXONT:000011,EXONT:001904,EXONT:002147,EXONT:002302
EXONT:003700	Cyclase activity	GO_molecular_function	GO:0009975	EXONT:000001,EXONT:000002
EXONT:003720	Signal transduction histidine kinase EnvZ-like, dimerisation/phosphoacceptor domain	IPR_Domain	IPR003661	EXONT:000001,EXONT:000002,EXONT:000003,EXONT:000012,EXONT:001904,EXONT:001905,EXONT:001906,EXONT:001910,EXONT:002242,EXONT:002248,EXONT:002399,EXONT:002401,EXONT:002402,EXONT:003719
EXONT:003733	S-adenosylmethionine-homocysteine S-methyltransferase activity	GO_molecular_function	GO:0008898	EXONT:000001,EXONT:000002,EXONT:001904,EXONT:002438,EXONT:002439,EXONT:002440,EXONT:002855
EXONT:003734	Homocysteine S-methyltransferase	IPR_Domain	IPR003726	EXONT:000001,EXONT:000002,EXONT:001904,EXONT:002438,EXONT:002439,EXONT:002440,EXONT:002855,EXONT:003733
EXONT:003741	Uroporphyrinogen-III synthase activity	GO_molecular_function	GO:0004852	EXONT:000001,EXONT:000002,EXONT:002003,EXONT:002078,EXONT:002616
EXONT:003742	Tetrapyrrole biosynthesis, uroporphyrinogen III synthase	IPR_Domain	IPR003754	EXONT:000001,EXONT:000002,EXONT:002003,EXONT:002078,EXONT:002616,EXONT:003741
EXONT:003744	Cobalamin (vitamin B12)-binding module, cap domain	IPR_Domain	IPR003759	EXONT:000001,EXONT:000002,EXONT:000005,EXONT:001904,EXONT:001928,EXONT:001932,EXONT:001937,EXONT:001938,EXONT:001939,EXONT:001988,EXONT:002211,EXONT:002438,EXONT:002439,EXONT:002678,EXONT:002855,EXONT:003556,EXONT:003745,EXONT:003746
EXONT:003745	Methionine synthase activity	GO_molecular_function	GO:0008705	EXONT:000001,EXONT:000002,EXONT:001904,EXONT:002438,EXONT:002439,EXONT:002855,EXONT:003746
EXONT:003746	5-methyltetrahydrofolate-dependent methyltransferase activity	GO_molecular_function	GO:0042084	EXONT:000001,EXONT:000002,EXONT:001904,EXONT:002438,EXONT:002439
EXONT:003752	Peroxiredoxin activity	GO_molecular_function	GO:0051920	EXONT:000001,EXONT:000002,EXONT:001912,EXONT:001913
EXONT:003757	Aspartyl/glutamyl-tRNA amidotransferase subunit B-related	IPR_Domain	IPR003789	EXONT:000001,EXONT:000002,EXONT:001902,EXONT:002342,EXONT:002950
EXONT:003767	Tubulin/FtsZ, 2-layer sandwich domain	IPR_Domain	IPR018316	EXONT:000001,EXONT:000002,EXONT:000005,EXONT:001893,EXONT:001928,EXONT:001932,EXONT:001937,EXONT:001943,EXONT:001944,EXONT:001984,EXONT:001985,EXONT:001987,EXONT:001988,EXONT:001989,EXONT:001990,EXONT:001991,EXONT:001992,EXONT:001993,EXONT:001994,EXONT:001995,EXONT:001997,EXONT:001998,EXONT:002054,EXONT:002055,EXONT:002056,EXONT:002090,EXONT:002091,EXONT:002200
EXONT:003805	Fumarate reductase/succinate dehydrogenase, FAD-binding site	IPR_Site	IPR003952	EXONT:000001,EXONT:000002,EXONT:000005,EXONT:001912
EXONT:003813	Fatty acid synthase activity	GO_molecular_function	GO:0004312	EXONT:000001,EXONT:000002,EXONT:001904,EXONT:002032,EXONT:002033
EXONT:003820	Glycerone kinase activity	GO_molecular_function	GO:0004371	EXONT:000001,EXONT:000002,EXONT:001904,EXONT:001905,EXONT:001906,EXONT:001910
EXONT:003821	Dak kinase	IPR_Domain	IPR004006	EXONT:000001,EXONT:000002,EXONT:001904,EXONT:001905,EXONT:001906,EXONT:001910,EXONT:003820
EXONT:003822	DhaL domain	IPR_Domain	IPR004007	EXONT:000001,EXONT:000002,EXONT:001904,EXONT:001905,EXONT:001906,EXONT:001910,EXONT:003820
EXONT:003823	Myosin, N-terminal, SH3-like	IPR_Domain	IPR004009	EXONT:000001,EXONT:000002,EXONT:000005,EXONT:001893,EXONT:001928,EXONT:001932,EXONT:001937,EXONT:001943,EXONT:001944,EXONT:001984,EXONT:001985,EXONT:001986,EXONT:001987,EXONT:001988,EXONT:001989,EXONT:001990,EXONT:001991,EXONT:001992,EXONT:001993,EXONT:001994,EXONT:001995,EXONT:001996,EXONT:001997,EXONT:001998,EXONT:001999,EXONT:002054,EXONT:002055,EXONT:002924
EXONT:003840	Oxidoreductase activity, acting on paired donors, with incorporation or reduction of molecular oxygen, NAD(P)H as one donor, and incorporation of one atom of oxygen	GO_molecular_function	GO:0016709	EXONT:000001,EXONT:000002,EXONT:001912,EXONT:002167,EXONT:002170
EXONT:003841	Nitric-oxide synthase activity	GO_molecular_function	GO:0004517	EXONT:000001,EXONT:000002,EXONT:001912,EXONT:002167,EXONT:002170,EXONT:003840
EXONT:003842	Nitric oxide synthase, oxygenase domain	IPR_Domain	IPR004030	EXONT:000001,EXONT:000002,EXONT:001912,EXONT:002167,EXONT:002170,EXONT:003840,EXONT:003841
EXONT:003862	Hirudin/antistatin	IPR_Domain	IPR011061	EXONT:000001,EXONT:000002,EXONT:001887,EXONT:001888
EXONT:003863	Antistasin-like domain	IPR_Domain	IPR004094	EXONT:000001,EXONT:000002,EXONT:001887,EXONT:001888,EXONT:001889,EXONT:001890,EXONT:001893,EXONT:001894,EXONT:001895,EXONT:001896,EXONT:001897,EXONT:001899,EXONT:001980,EXONT:001981,EXONT:002074,EXONT:002502,EXONT:003862
EXONT:003867	DHHA2	IPR_Domain	IPR004097	EXONT:000001,EXONT:000002,EXONT:001893,EXONT:001943,EXONT:001944,EXONT:002054
EXONT:003869	FAD/NAD-linked reductase, dimerisation domain	IPR_Domain	IPR016156	EXONT:000001,EXONT:000002,EXONT:000005,EXONT:001912,EXONT:001928,EXONT:001932,EXONT:001937,EXONT:001984,EXONT:001987,EXONT:001988,EXONT:001997,EXONT:002017,EXONT:002018,EXONT:002019
EXONT:003870	Pyridine nucleotide-disulphide oxidoreductase, dimerisation domain	IPR_Domain	IPR004099	EXONT:000001,EXONT:000002,EXONT:000005,EXONT:001912,EXONT:001928,EXONT:001932,EXONT:001937,EXONT:001984,EXONT:001987,EXONT:001988,EXONT:001997,EXONT:002017,EXONT:002018,EXONT:002019,EXONT:003869
EXONT:003872	Mur ligase, C-terminal	IPR_Domain	IPR004101	EXONT:000001,EXONT:000002,EXONT:000005,EXONT:001902,EXONT:001928,EXONT:001932,EXONT:001937,EXONT:001984,EXONT:001985,EXONT:001986,EXONT:001987,EXONT:001988,EXONT:001989,EXONT:001990,EXONT:001991,EXONT:001992,EXONT:001993,EXONT:001994,EXONT:001995,EXONT:001996,EXONT:001997,EXONT:001998,EXONT:001999
EXONT:003873	NAD+ ADP-ribosyltransferase activity	GO_molecular_function	GO:0003950	EXONT:000001,EXONT:000002,EXONT:001904,EXONT:002041,EXONT:003315
EXONT:003874	Poly(ADP-ribose) polymerase, regulatory domain	IPR_Domain	IPR004102	EXONT:000001,EXONT:000002,EXONT:001904,EXONT:002041,EXONT:003315,EXONT:003873
EXONT:003877	Oxidoreductase, C-terminal	IPR_Domain	IPR004104	EXONT:000001,EXONT:000002,EXONT:001912
EXONT:003884	FAD-linked oxidase, C-terminal	IPR_Domain	IPR004113	EXONT:000001,EXONT:000002,EXONT:000005,EXONT:001928,EXONT:001932,EXONT:001937,EXONT:001984,EXONT:001987,EXONT:001988,EXONT:001997,EXONT:002017,EXONT:002018,EXONT:002019,EXONT:003885
EXONT:003885	FAD-linked oxidase-like, C-terminal	IPR_Domain	IPR016164	EXONT:000001,EXONT:000002,EXONT:000005,EXONT:001928,EXONT:001932,EXONT:001937,EXONT:001984,EXONT:001987,EXONT:001988,EXONT:001997,EXONT:002017,EXONT:002018,EXONT:002019
EXONT:003887	GAD domain	IPR_Domain	IPR004115	EXONT:000001,EXONT:000002,EXONT:000005,EXONT:001902,EXONT:001928,EXONT:001932,EXONT:001937,EXONT:001984,EXONT:001985,EXONT:001986,EXONT:001987,EXONT:001988,EXONT:001989,EXONT:001990,EXONT:001991,EXONT:001992,EXONT:001993,EXONT:001994,EXONT:001995,EXONT:001996,EXONT:001997,EXONT:001998,EXONT:001999,EXONT:002418,EXONT:002419,EXONT:002420
EXONT:003895	Phospholipase A2 inhibitor	IPR_Domain	IPR004126	EXONT:000001,EXONT:000002,EXONT:000011,EXONT:001887,EXONT:001888,EXONT:001893,EXONT:001957,EXONT:002802,EXONT:002803,EXONT:003894,EXONT:003896,EXONT:003897
EXONT:003896	Lipase inhibitor activity	GO_molecular_function	GO:0055102	EXONT:000001,EXONT:000002,EXONT:001887,EXONT:001888,EXONT:001893,EXONT:001957,EXONT:002802
EXONT:003897	Phospholipase inhibitor activity	GO_molecular_function	GO:0004859	EXONT:000001,EXONT:000002,EXONT:001887,EXONT:001888,EXONT:001893,EXONT:001957,EXONT:002802,EXONT:002803,EXONT:003896
EXONT:003903	Oxidoreductase activity, acting on single donors with incorporation of molecular oxygen	GO_molecular_function	GO:0016701	EXONT:000001,EXONT:000002,EXONT:001912
EXONT:003907	UbiB domain	IPR_Domain	IPR004147	EXONT:000001,EXONT:000002,EXONT:001904,EXONT:001905,EXONT:002212
EXONT:003912	Ligase activity, forming phosphoric ester bonds	GO_molecular_function	GO:0016886	EXONT:000001,EXONT:000002,EXONT:001902
EXONT:003913	DNA ligase activity	GO_molecular_function	GO:0003909	EXONT:000001,EXONT:000002,EXONT:001902,EXONT:003912
EXONT:003925	Coenzyme A transferase binding site	IPR_Site	IPR004163	EXONT:000001,EXONT:000002,EXONT:000005,EXONT:001904,EXONT:002492,EXONT:003926
EXONT:003926	CoA-transferase activity	GO_molecular_function	GO:0008410	EXONT:000001,EXONT:000002,EXONT:001904,EXONT:002492
EXONT:003927	Coenzyme A transferase active site	IPR_Site	IPR004164	EXONT:000001,EXONT:000002,EXONT:000018,EXONT:001904,EXONT:002492,EXONT:003926
EXONT:003928	MHCK/EF2 kinase	IPR_Domain	IPR004166	EXONT:000001,EXONT:000002,EXONT:000005,EXONT:001904,EXONT:001905,EXONT:001906,EXONT:001910,EXONT:001928,EXONT:001932,EXONT:001937,EXONT:001984,EXONT:001985,EXONT:001986,EXONT:001987,EXONT:001988,EXONT:001989,EXONT:001990,EXONT:001991,EXONT:001992,EXONT:001993,EXONT:001994,EXONT:001995,EXONT:001996,EXONT:001997,EXONT:001998,EXONT:001999,EXONT:002212,EXONT:002248,EXONT:002249
EXONT:003929	E3 binding	IPR_Domain	IPR004167	EXONT:000001,EXONT:000002,EXONT:001904,EXONT:002032
EXONT:003952	Phenylalanine-tRNA ligase activity	GO_molecular_function	GO:0004826	EXONT:000001,EXONT:000002,EXONT:001902,EXONT:002418,EXONT:002419,EXONT:002420
EXONT:003955	Integrase activity	GO_molecular_function	GO:0008907	EXONT:000001,EXONT:000002
EXONT:003956	Integrase, Tn916-type, N-terminal DNA binding	IPR_Domain	IPR004191	EXONT:000001,EXONT:000002,EXONT:000005,EXONT:001928,EXONT:001929,EXONT:001930,EXONT:001932,EXONT:002838,EXONT:003955
EXONT:003957	Oxidoreductase activity, acting on diphenols and related substances as donors	GO_molecular_function	GO:0016679	EXONT:000001,EXONT:000002,EXONT:001912
EXONT:003958	Oxidoreductase activity, acting on diphenols and related substances as donors, cytochrome as acceptor	GO_molecular_function	GO:0016681	EXONT:000001,EXONT:000002,EXONT:001912,EXONT:003957
EXONT:003959	Ubiquinol-cytochrome-c reductase activity	GO_molecular_function	GO:0008121	EXONT:000001,EXONT:000002,EXONT:000004,EXONT:001912,EXONT:002363,EXONT:002384,EXONT:002385,EXONT:002386,EXONT:002392,EXONT:002395,EXONT:003214,EXONT:003215,EXONT:003957,EXONT:003958
EXONT:003960	Ubiquinol cytochrome reductase, transmembrane domain	IPR_Domain	IPR004192	EXONT:000001,EXONT:000002,EXONT:000004,EXONT:001912,EXONT:002363,EXONT:002384,EXONT:002385,EXONT:002386,EXONT:002392,EXONT:002395,EXONT:003214,EXONT:003215,EXONT:003957,EXONT:003958,EXONT:003959
EXONT:003961	Glycoside hydrolase, family 13, N-terminal	IPR_Domain	IPR004193	EXONT:000001,EXONT:000002,EXONT:001893,EXONT:001920,EXONT:002111
EXONT:003977	Glutathione synthase activity	GO_molecular_function	GO:0004363	EXONT:000001,EXONT:000002,EXONT:001902,EXONT:002342,EXONT:002343
EXONT:003982	Vitamin B12-dependent methionine synthase, activation domain	IPR_Domain	IPR004223	EXONT:000001,EXONT:000002,EXONT:001904,EXONT:002438,EXONT:002439,EXONT:002855,EXONT:003745,EXONT:003746
EXONT:003983	Formiminotransferase catalytic domain	IPR_Domain	IPR004227	EXONT:000001,EXONT:000002,EXONT:000005,EXONT:001904,EXONT:001928,EXONT:001932,EXONT:001937,EXONT:001984,EXONT:001988,EXONT:002211,EXONT:002829,EXONT:002831,EXONT:003420,EXONT:003984,EXONT:003985
EXONT:003997	O-acyltransferase activity	GO_molecular_function	GO:0008374	EXONT:000001,EXONT:000002,EXONT:001904,EXONT:002032,EXONT:002033
EXONT:003998	Acylglycerol O-acyltransferase activity	GO_molecular_function	GO:0016411	EXONT:000001,EXONT:000002,EXONT:001904,EXONT:002032,EXONT:002033,EXONT:003997
EXONT:004004	Dynein heavy chain domain	IPR_Domain	IPR004273	EXONT:000001,EXONT:000002,EXONT:001893,EXONT:001943,EXONT:001944,EXONT:002054,EXONT:002055,EXONT:002924,EXONT:002978
EXONT:004026	Signal transduction histidine kinase-related protein, C-terminal	IPR_Domain	IPR004358	EXONT:000001,EXONT:000002,EXONT:001904,EXONT:001905
EXONT:004028	Aminoacyl-tRNA synthetase, class II (D/K/N)	IPR_Domain	IPR004364	EXONT:000001,EXONT:000002,EXONT:000005,EXONT:001902,EXONT:001928,EXONT:001932,EXONT:001937,EXONT:001984,EXONT:001985,EXONT:001986,EXONT:001987,EXONT:001988,EXONT:001989,EXONT:001990,EXONT:001991,EXONT:001992,EXONT:001993,EXONT:001994,EXONT:001995,EXONT:001996,EXONT:001997,EXONT:001998,EXONT:001999,EXONT:002418,EXONT:002419,EXONT:002420,EXONT:004029
EXONT:004029	Aminoacyl-tRNA synthetase, class II	IPR_Domain	IPR006195	EXONT:000001,EXONT:000002,EXONT:001902,EXONT:002418,EXONT:002419,EXONT:002420
EXONT:004037	Phosphotransferase activity, phosphate group as acceptor	GO_molecular_function	GO:0016776	EXONT:000001,EXONT:000002,EXONT:001904,EXONT:001905
EXONT:004044	Orotate phosphoribosyl transferase domain	IPR_Domain	IPR004467	EXONT:000001,EXONT:000002,EXONT:000011,EXONT:001904,EXONT:002041,EXONT:002470,EXONT:003315,EXONT:004045
EXONT:004045	Orotate phosphoribosyltransferase activity	GO_molecular_function	GO:0004588	EXONT:000001,EXONT:000002,EXONT:001904,EXONT:002041,EXONT:003315
EXONT:004054	1-acyl-sn-glycerol-3-phosphate acyltransferase	IPR_Domain	IPR004552	EXONT:000001,EXONT:000002,EXONT:001904,EXONT:002032,EXONT:002033,EXONT:003145,EXONT:003997,EXONT:003998,EXONT:004055,EXONT:004056,EXONT:004057
EXONT:004055	1-acylglycerol-3-phosphate O-acyltransferase activity	GO_molecular_function	GO:0003841	EXONT:000001,EXONT:000002,EXONT:001904,EXONT:002032,EXONT:002033,EXONT:003997,EXONT:003998,EXONT:004056,EXONT:004057
EXONT:004056	Lysophospholipid acyltransferase activity	GO_molecular_function	GO:0071617	EXONT:000001,EXONT:000002,EXONT:001904,EXONT:002032,EXONT:002033
EXONT:004057	Lysophosphatidic acid acyltransferase activity	GO_molecular_function	GO:0042171	EXONT:000001,EXONT:000002,EXONT:001904,EXONT:002032,EXONT:002033,EXONT:004056
EXONT:004059	Phosphotransferase activity, for other substituted phosphate groups	GO_molecular_function	GO:0016780	EXONT:000001,EXONT:000002,EXONT:001904,EXONT:001905
EXONT:004060	Holo-[acyl-carrier-protein] synthase activity	GO_molecular_function	GO:0008897	EXONT:000001,EXONT:000002,EXONT:001904,EXONT:001905,EXONT:004059
EXONT:004061	4'-phosphopantetheinyl transferase superfamily	IPR_Domain	IPR008278	EXONT:000001,EXONT:000002,EXONT:000005,EXONT:001904,EXONT:001905,EXONT:001937,EXONT:001938,EXONT:001939,EXONT:001946,EXONT:004059,EXONT:004060
EXONT:004080	GMP synthase, N-terminal	IPR_Domain	IPR004739	EXONT:000001,EXONT:000002,EXONT:000005,EXONT:001902,EXONT:001928,EXONT:001932,EXONT:001937,EXONT:001984,EXONT:001985,EXONT:001986,EXONT:001987,EXONT:001988,EXONT:001989,EXONT:001990,EXONT:001991,EXONT:001992,EXONT:001993,EXONT:001994,EXONT:001995,EXONT:001996,EXONT:001997,EXONT:001998,EXONT:001999,EXONT:002342,EXONT:002950,EXONT:002951
EXONT:004091	Cytidyltransferase-like domain	IPR_Domain	IPR004821	EXONT:000001,EXONT:000002
EXONT:004098	Aminotransferases, class-I, pyridoxal-phosphate-binding site	IPR_Site	IPR004838	EXONT:000001,EXONT:000002,EXONT:000005,EXONT:001928,EXONT:001932,EXONT:001937,EXONT:001984,EXONT:002018,EXONT:002357
EXONT:004102	Phosphoesterase domain	IPR_Domain	IPR004843	EXONT:000001,EXONT:000002,EXONT:001893
EXONT:004109	Putative 5-3 exonuclease	IPR_Domain	IPR004859	EXONT:000001,EXONT:000002,EXONT:000005,EXONT:001893,EXONT:001928,EXONT:001929,EXONT:001932,EXONT:001957,EXONT:002081,EXONT:003285
EXONT:004114	Glycoside hydrolase, family 2/20, immunoglobulin-like beta-sandwich domain	IPR_Domain	IPR013812	EXONT:000001,EXONT:000002,EXONT:001893,EXONT:001920,EXONT:002111
EXONT:004125	Glutathione synthase, substrate-binding, eukaryotic	IPR_Domain	IPR004887	EXONT:000001,EXONT:000002,EXONT:000005,EXONT:000011,EXONT:001902,EXONT:001928,EXONT:001932,EXONT:001937,EXONT:001984,EXONT:001985,EXONT:001986,EXONT:001987,EXONT:001988,EXONT:001989,EXONT:001990,EXONT:001991,EXONT:001992,EXONT:001993,EXONT:001994,EXONT:001995,EXONT:001996,EXONT:001997,EXONT:001998,EXONT:001999,EXONT:002342,EXONT:002343,EXONT:003977,EXONT:004124
EXONT:004144	Aldehyde-lyase domain	IPR_Domain	IPR005000	EXONT:000001,EXONT:000002,EXONT:001977
EXONT:004150	Dicer dimerisation domain	IPR_Domain	IPR005034	EXONT:000001,EXONT:000002,EXONT:001893,EXONT:001957,EXONT:002081,EXONT:002082,EXONT:002562,EXONT:002565,EXONT:002566,EXONT:002567
EXONT:004159	Moybdenum cofactor oxidoreductase, dimerisation	IPR_Domain	IPR005066	EXONT:000001,EXONT:000002,EXONT:000005,EXONT:000011,EXONT:001912,EXONT:001937,EXONT:001938,EXONT:001939,EXONT:001940,EXONT:002181,EXONT:004066
EXONT:004170	DNA photolyase activity	GO_molecular_function	GO:0003913	EXONT:000001,EXONT:000002,EXONT:002003,EXONT:002004
EXONT:004171	DNA photolyase, FAD-binding/Cryptochrome, C-terminal	IPR_Domain	IPR005101	EXONT:000001,EXONT:000002,EXONT:002003,EXONT:002004,EXONT:004170
EXONT:004174	Uridylyltransferase activity	GO_molecular_function	GO:0070569	EXONT:000001,EXONT:000002,EXONT:001904,EXONT:001905,EXONT:002067
EXONT:004177	Aspartate/homoserine dehydrogenase, NAD-binding	IPR_Domain	IPR005106	EXONT:000001,EXONT:000002,EXONT:000005,EXONT:001912,EXONT:001928,EXONT:001932,EXONT:001987,EXONT:001988,EXONT:001997,EXONT:002018,EXONT:002019,EXONT:002160
EXONT:004190	Phenylalanine-tRNA ligase, beta subunit, ferrodoxin-fold anticodon-binding	IPR_Domain	IPR005121	EXONT:000001,EXONT:000002,EXONT:000005,EXONT:001902,EXONT:001928,EXONT:001929,EXONT:001932,EXONT:001937,EXONT:001938,EXONT:001939,EXONT:001946,EXONT:001948,EXONT:001984,EXONT:001985,EXONT:001986,EXONT:001987,EXONT:001988,EXONT:001989,EXONT:001990,EXONT:001991,EXONT:001992,EXONT:001993,EXONT:001994,EXONT:001995,EXONT:001996,EXONT:001997,EXONT:001998,EXONT:001999,EXONT:002418,EXONT:002419,EXONT:002…
EXONT:004192	Oxoglutarate/iron-dependent dioxygenase	IPR_Domain	IPR005123	EXONT:000001,EXONT:000002,EXONT:001912,EXONT:002170,EXONT:004193,EXONT:004194
EXONT:004193	Oxidoreductase activity, acting on paired donors, with incorporation or reduction of molecular oxygen, 2-oxoglutarate as one donor, and incorporation of one atom each of oxygen into both donors	GO_molecular_function	GO:0016706	EXONT:000001,EXONT:000002,EXONT:001912,EXONT:002170,EXONT:004194
EXONT:004194	Dioxygenase activity	GO_molecular_function	GO:0051213	EXONT:000001,EXONT:000002,EXONT:001912
EXONT:004199	Carbon-nitrogen lyase activity	GO_molecular_function	GO:0016840	EXONT:000001,EXONT:000002,EXONT:002003
EXONT:004200	Ammonia-lyase activity	GO_molecular_function	GO:0016841	EXONT:000001,EXONT:000002,EXONT:002003,EXONT:004199
EXONT:004211	B3/B4 tRNA-binding domain	IPR_Domain	IPR005146	EXONT:000001,EXONT:000002,EXONT:000005,EXONT:001902,EXONT:001928,EXONT:001929,EXONT:001932,EXONT:001948,EXONT:002418,EXONT:002419,EXONT:002420,EXONT:003952
EXONT:004213	Arginyl tRNA synthetase N-terminal domain	IPR_Domain	IPR005148	EXONT:000001,EXONT:000002,EXONT:000005,EXONT:001902,EXONT:001928,EXONT:001932,EXONT:001937,EXONT:001984,EXONT:001985,EXONT:001986,EXONT:001987,EXONT:001988,EXONT:001989,EXONT:001990,EXONT:001991,EXONT:001992,EXONT:001993,EXONT:001994,EXONT:001995,EXONT:001996,EXONT:001997,EXONT:001998,EXONT:001999,EXONT:002418,EXONT:002419,EXONT:002420,EXONT:004214
EXONT:004214	Arginine-tRNA ligase activity	GO_molecular_function	GO:0004814	EXONT:000001,EXONT:000002,EXONT:001902,EXONT:002418,EXONT:002419,EXONT:002420
EXONT:004216	Interphotoreceptor retinol-binding	IPR_Domain	IPR005151	EXONT:000001,EXONT:000002,EXONT:001893,EXONT:001894,EXONT:001897,EXONT:001980,EXONT:001981
EXONT:004222	Ku70/Ku80 C-terminal arm	IPR_Domain	IPR005160	EXONT:000001,EXONT:000002,EXONT:000005,EXONT:001893,EXONT:001928,EXONT:001929,EXONT:001930,EXONT:001932,EXONT:001943,EXONT:001944,EXONT:002054,EXONT:002055,EXONT:002333,EXONT:002350,EXONT:002351,EXONT:002352,EXONT:002353,EXONT:002666,EXONT:002667,EXONT:002668
EXONT:004244	Focal adhesion kinase, targeting (FAT) domain	IPR_Domain	IPR005189	EXONT:000001,EXONT:000002,EXONT:000003,EXONT:000012,EXONT:001904,EXONT:001905,EXONT:001906,EXONT:001910,EXONT:002248,EXONT:002808
EXONT:004248	Glycoside hydrolase, family 65, central catalytic	IPR_Domain	IPR005195	EXONT:000001,EXONT:000002
EXONT:004250	Mannosyl-glycoprotein endo-beta-N-acetylglucosaminidase activity	GO_molecular_function	GO:0033925	EXONT:000001,EXONT:000002,EXONT:001893,EXONT:001920,EXONT:002111
EXONT:004251	Glycoside hydrolase, family 85	IPR_Domain	IPR005201	EXONT:000001,EXONT:000002,EXONT:001893,EXONT:001920,EXONT:002111,EXONT:004250
EXONT:004266	Molybdenum cofactor sulfurase, C-terminal	IPR_Domain	IPR005302	EXONT:000001,EXONT:000002,EXONT:000005,EXONT:001928,EXONT:001932,EXONT:001937,EXONT:001938,EXONT:001939,EXONT:001940,EXONT:001984,EXONT:002018,EXONT:002357,EXONT:004066
EXONT:004291	Transketolase, C-terminal	IPR_Domain	IPR005476	EXONT:000001,EXONT:000002
EXONT:004294	Carbamoyl-phosphate synthase, large subunit, N-terminal	IPR_Domain	IPR005481	EXONT:000001,EXONT:000002,EXONT:000011,EXONT:004124
EXONT:004296	Biotin carboxylase, C-terminal	IPR_Domain	IPR005482	EXONT:000001,EXONT:000002,EXONT:000011,EXONT:001902,EXONT:004295
EXONT:004336	RNA polymerase, Rpb5, N-terminal	IPR_Domain	IPR005571	EXONT:000001,EXONT:000002,EXONT:000005,EXONT:001904,EXONT:001905,EXONT:001928,EXONT:001929,EXONT:001930,EXONT:001932,EXONT:002067,EXONT:002072,EXONT:002408
EXONT:004340	RNA polymerase Rpb7, N-terminal	IPR_Domain	IPR005576	EXONT:000001,EXONT:000002,EXONT:001904,EXONT:001905,EXONT:002067,EXONT:002072,EXONT:002408
EXONT:004368	Dihydroorotate dehydrogenase domain	IPR_Domain	IPR005720	EXONT:000001,EXONT:000002,EXONT:001912,EXONT:002480
EXONT:004371	Disulphide isomerase	IPR_Domain	IPR005788	EXONT:000001,EXONT:000002,EXONT:000011,EXONT:002139,EXONT:002495,EXONT:004372
EXONT:004373	Formyl transferase, C-terminal-like	IPR_Domain	IPR011034	EXONT:000001,EXONT:000002
EXONT:004374	Formyl transferase, C-terminal	IPR_Domain	IPR005793	EXONT:000001,EXONT:000002,EXONT:001904,EXONT:002438,EXONT:003212,EXONT:004373
EXONT:004381	Rieske [2Fe-2S] iron-sulphur domain	IPR_Domain	IPR017941	EXONT:000001,EXONT:000002,EXONT:000005,EXONT:001912,EXONT:002205,EXONT:002206,EXONT:002944
EXONT:004382	Rieske iron-sulphur protein, C-terminal	IPR_Domain	IPR005805	EXONT:000001,EXONT:000002,EXONT:000004,EXONT:000005,EXONT:001912,EXONT:002205,EXONT:002206,EXONT:002363,EXONT:002384,EXONT:002385,EXONT:002386,EXONT:002392,EXONT:002395,EXONT:002944,EXONT:003214,EXONT:003215,EXONT:003957,EXONT:003958,EXONT:003959,EXONT:004381
EXONT:004383	ATP-citrate lyase/succinyl-CoA ligase	IPR_Domain	IPR005811	EXONT:000001,EXONT:000002,EXONT:000011,EXONT:004384
EXONT:004391	Nucleotidyl transferase	IPR_Domain	IPR005835	EXONT:000001,EXONT:000002,EXONT:001904,EXONT:001905,EXONT:002067
EXONT:004394	Intramolecular transferase activity, phosphotransferases	GO_molecular_function	GO:0016868	EXONT:000001,EXONT:000002,EXONT:002139,EXONT:003207
EXONT:004395	Alpha-D-phosphohexomutase, C-terminal	IPR_Domain	IPR005843	EXONT:000001,EXONT:000002,EXONT:002139,EXONT:003207,EXONT:004394
EXONT:004396	Alpha-D-phosphohexomutase, alpha/beta/alpha domain I	IPR_Domain	IPR005844	EXONT:000001,EXONT:000002,EXONT:002139,EXONT:003207,EXONT:004394
EXONT:004397	Alpha-D-phosphohexomutase, alpha/beta/alpha domain II	IPR_Domain	IPR005845	EXONT:000001,EXONT:000002,EXONT:002139,EXONT:003207,EXONT:004394
EXONT:004398	Alpha-D-phosphohexomutase, alpha/beta/alpha domain III	IPR_Domain	IPR005846	EXONT:000001,EXONT:000002,EXONT:002139,EXONT:003207,EXONT:004394
EXONT:004399	UDP-glucose:hexose-1-phosphate uridylyltransferase activity	GO_molecular_function	GO:0008108	EXONT:000001,EXONT:000002,EXONT:001904,EXONT:001905,EXONT:002067,EXONT:004174
EXONT:004400	Galactose-1-phosphate uridyl transferase, N-terminal	IPR_Domain	IPR005849	EXONT:000001,EXONT:000002,EXONT:001904,EXONT:001905,EXONT:002067,EXONT:004174,EXONT:004399
EXONT:004401	Galactose-1-phosphate uridyl transferase, C-terminal	IPR_Domain	IPR005850	EXONT:000001,EXONT:000002,EXONT:001904,EXONT:001905,EXONT:002067,EXONT:004174,EXONT:004399
EXONT:004407	6-phosphogluconolactonase, DevB-type	IPR_Domain	IPR005900	EXONT:000001,EXONT:000002,EXONT:000011,EXONT:001893,EXONT:001957,EXONT:001958,EXONT:004406,EXONT:004408
EXONT:004408	6-phosphogluconolactonase activity	GO_molecular_function	GO:0017057	EXONT:000001,EXONT:000002,EXONT:001893,EXONT:001957,EXONT:001958
EXONT:004418	Tyrosine aminotransferase	IPR_Domain	IPR005957	EXONT:000001,EXONT:000002,EXONT:000005,EXONT:000011,EXONT:001904,EXONT:001928,EXONT:001932,EXONT:001937,EXONT:001984,EXONT:002018,EXONT:002043,EXONT:002357,EXONT:004099,EXONT:004419,EXONT:004420,EXONT:004421,EXONT:004422,EXONT:004423
EXONT:004419	Tyrosine/nicotianamine aminotransferase	IPR_Domain	IPR005958	EXONT:000001,EXONT:000002,EXONT:000005,EXONT:000011,EXONT:001904,EXONT:001928,EXONT:001932,EXONT:001937,EXONT:001984,EXONT:002018,EXONT:002043,EXONT:002357,EXONT:004099,EXONT:004420,EXONT:004421
EXONT:004420	Transferase activity, transferring nitrogenous groups	GO_molecular_function	GO:0016769	EXONT:000001,EXONT:000002,EXONT:001904
EXONT:004421	Transaminase activity	GO_molecular_function	GO:0008483	EXONT:000001,EXONT:000002,EXONT:001904,EXONT:004420
EXONT:004422	L-tyrosine aminotransferase activity	GO_molecular_function	GO:0070547	EXONT:000001,EXONT:000002,EXONT:001904,EXONT:004420,EXONT:004421
EXONT:004423	L-tyrosine:2-oxoglutarate aminotransferase activity	GO_molecular_function	GO:0004838	EXONT:000001,EXONT:000002,EXONT:001904,EXONT:004420,EXONT:004421,EXONT:004422
EXONT:004437	Glycosyl hydrolase, family 13, catalytic domain	IPR_Domain	IPR006047	EXONT:000001,EXONT:000002,EXONT:000005,EXONT:000011,EXONT:001937,EXONT:001938,EXONT:002691,EXONT:002692
EXONT:004438	Alpha-amylase, C-terminal all beta	IPR_Domain	IPR006048	EXONT:000001,EXONT:000002,EXONT:000005,EXONT:000011,EXONT:001937,EXONT:001938,EXONT:004439
EXONT:004447	Exonuclease	IPR_Domain	IPR006055	EXONT:000001,EXONT:000002,EXONT:000005,EXONT:001893,EXONT:001928,EXONT:001929,EXONT:001932,EXONT:001957,EXONT:002081,EXONT:002905,EXONT:003285,EXONT:004446
EXONT:004458	Aspartyl/Glutamyl-tRNA(Gln) amidotransferase, subunit B/E, catalytic	IPR_Domain	IPR006075	EXONT:000001,EXONT:000002,EXONT:001902
EXONT:004459	FAD dependent oxidoreductase	IPR_Domain	IPR006076	EXONT:000001,EXONT:000002,EXONT:001912
EXONT:004462	Phosphoribulokinase/uridine kinase	IPR_Domain	IPR006083	EXONT:000001,EXONT:000002,EXONT:000005,EXONT:001904,EXONT:001905,EXONT:001910,EXONT:001928,EXONT:001932,EXONT:001937,EXONT:001984,EXONT:001985,EXONT:001986,EXONT:001987,EXONT:001988,EXONT:001989,EXONT:001990,EXONT:001991,EXONT:001992,EXONT:001993,EXONT:001994,EXONT:001995,EXONT:001996,EXONT:001997,EXONT:001998,EXONT:001999
EXONT:004463	XPG N-terminal	IPR_Domain	IPR006085	EXONT:000001,EXONT:000002,EXONT:001893,EXONT:001957,EXONT:002081
EXONT:004464	XPG-I domain	IPR_Domain	IPR006086	EXONT:000001,EXONT:000002,EXONT:001893,EXONT:001957,EXONT:002081
EXONT:004465	Acyl-CoA dehydrogenase activity	GO_molecular_function	GO:0003995	EXONT:000001,EXONT:000002,EXONT:001912,EXONT:002480
EXONT:004466	Acyl-CoA dehydrogenase, conserved site	IPR_Site	IPR006089	EXONT:000001,EXONT:000002,EXONT:001912,EXONT:002480,EXONT:004465
EXONT:004467	Acyl-CoA oxidase/dehydrogenase, central domain	IPR_Domain	IPR006091	EXONT:000001,EXONT:000002,EXONT:001912,EXONT:002480,EXONT:004465
EXONT:004469	FAD linked oxidase, N-terminal	IPR_Domain	IPR006094	EXONT:000001,EXONT:000002,EXONT:000005,EXONT:001912,EXONT:001928,EXONT:001932,EXONT:001937,EXONT:001984,EXONT:001987,EXONT:001988,EXONT:001997,EXONT:002015,EXONT:002017,EXONT:002018,EXONT:002019,EXONT:002266,EXONT:003195,EXONT:004470
EXONT:004470	UDP-N-acetylmuramate dehydrogenase activity	GO_molecular_function	GO:0008762	EXONT:000001,EXONT:000002,EXONT:001912,EXONT:002015,EXONT:002266
EXONT:004471	Glutamate/phenylalanine/leucine/valine dehydrogenase, C-terminal	IPR_Domain	IPR006096	EXONT:000001,EXONT:000002,EXONT:000011,EXONT:001912,EXONT:002478
EXONT:004472	Glutamate/phenylalanine/leucine/valine dehydrogenase, dimerisation domain	IPR_Domain	IPR006097	EXONT:000001,EXONT:000002,EXONT:001912
EXONT:004473	Methylmalonyl-CoA mutase, alpha/beta chain, catalytic	IPR_Domain	IPR006099	EXONT:000001,EXONT:000002,EXONT:000005,EXONT:001928,EXONT:001932,EXONT:001988,EXONT:002139,EXONT:002211,EXONT:002678,EXONT:003207,EXONT:003554,EXONT:003556
EXONT:004474	Methylmalonyl-CoA mutase, alpha chain, catalytic	IPR_Domain	IPR006098	EXONT:000001,EXONT:000002,EXONT:000005,EXONT:001928,EXONT:001932,EXONT:001988,EXONT:002139,EXONT:002211,EXONT:002678,EXONT:003207,EXONT:003554,EXONT:003556,EXONT:004473,EXONT:004475
EXONT:004475	Methylmalonyl-CoA mutase activity	GO_molecular_function	GO:0004494	EXONT:000001,EXONT:000002,EXONT:002139,EXONT:003207
EXONT:004476	Glycoside hydrolase, family 2, immunoglobulin-like beta-sandwich	IPR_Domain	IPR006102	EXONT:000001,EXONT:000002,EXONT:001893,EXONT:001920,EXONT:002111,EXONT:004114
EXONT:004477	Glycoside hydrolase, family 2, TIM barrel	IPR_Domain	IPR006103	EXONT:000001,EXONT:000002,EXONT:000011,EXONT:001893,EXONT:001920,EXONT:002111,EXONT:002691,EXONT:002692
EXONT:004478	Glycosyl hydrolases family 2, sugar binding domain	IPR_Domain	IPR006104	EXONT:000001,EXONT:000002,EXONT:000011,EXONT:001893,EXONT:001920,EXONT:002111,EXONT:002222
EXONT:004480	3-hydroxyacyl-CoA dehydrogenase, C-terminal	IPR_Domain	IPR006108	EXONT:000001,EXONT:000002,EXONT:000005,EXONT:000011,EXONT:001912,EXONT:002015,EXONT:002018,EXONT:002019,EXONT:002266,EXONT:003629,EXONT:003630,EXONT:004481
EXONT:004481	3-hydroxyacyl-CoA dehydrogenase activity	GO_molecular_function	GO:0003857	EXONT:000001,EXONT:000002,EXONT:001912,EXONT:002015,EXONT:002266
EXONT:004482	Glycerol-3-phosphate dehydrogenase, NAD-dependent, C-terminal	IPR_Domain	IPR006109	EXONT:000001,EXONT:000002,EXONT:000005,EXONT:000011,EXONT:001912,EXONT:002015,EXONT:002018,EXONT:002019,EXONT:002266,EXONT:003629,EXONT:003630,EXONT:004483
EXONT:004483	Glycerol-3-phosphate dehydrogenase [NAD+] activity	GO_molecular_function	GO:0004367	EXONT:000001,EXONT:000002,EXONT:001912,EXONT:002015,EXONT:002266
EXONT:004484	6-phosphogluconate dehydrogenase, C-terminal	IPR_Domain	IPR006114	EXONT:000001,EXONT:000002,EXONT:000005,EXONT:000011,EXONT:001912,EXONT:001928,EXONT:001932,EXONT:001987,EXONT:001988,EXONT:001997,EXONT:002015,EXONT:002018,EXONT:002019,EXONT:002160,EXONT:002266,EXONT:003629,EXONT:003630,EXONT:004485
EXONT:004485	Phosphogluconate dehydrogenase (decarboxylating) activity	GO_molecular_function	GO:0004616	EXONT:000001,EXONT:000002,EXONT:001912,EXONT:002015,EXONT:002266
EXONT:004486	6-phosphogluconate dehydrogenase, NADP-binding	IPR_Domain	IPR006115	EXONT:000001,EXONT:000002,EXONT:000011,EXONT:001912,EXONT:002015,EXONT:002266,EXONT:002478,EXONT:004485
EXONT:004487	2-5-oligoadenylate synthetase, N-terminal	IPR_Domain	IPR006116	EXONT:000001,EXONT:000002,EXONT:000005,EXONT:001904,EXONT:001928,EXONT:001929,EXONT:001932,EXONT:001937,EXONT:001948,EXONT:001984,EXONT:001985,EXONT:001986,EXONT:001987,EXONT:001988,EXONT:001989,EXONT:001990,EXONT:001991,EXONT:001992,EXONT:001993,EXONT:001994,EXONT:001995,EXONT:001996,EXONT:001997,EXONT:001998,EXONT:001999
EXONT:004488	2-5-oligoadenylate synthetase, conserved site	IPR_Site	IPR006117	EXONT:000001,EXONT:000002,EXONT:000005,EXONT:001904,EXONT:001928,EXONT:001929,EXONT:001932,EXONT:001937,EXONT:001948,EXONT:001984,EXONT:001985,EXONT:001986,EXONT:001987,EXONT:001988,EXONT:001989,EXONT:001990,EXONT:001991,EXONT:001992,EXONT:001993,EXONT:001994,EXONT:001995,EXONT:001996,EXONT:001997,EXONT:001998,EXONT:001999
EXONT:004499	Carboxyl- or carbamoyltransferase activity	GO_molecular_function	GO:0016743	EXONT:000001,EXONT:000002,EXONT:001904,EXONT:002438
EXONT:004500	Aspartate/ornithine carbamoyltransferase, Asp/Orn-binding domain	IPR_Domain	IPR006131	EXONT:000001,EXONT:000002,EXONT:000005,EXONT:001904,EXONT:001937,EXONT:001984,EXONT:001988,EXONT:002438,EXONT:002829,EXONT:002831,EXONT:003420,EXONT:004499
EXONT:004501	Aspartate/ornithine carbamoyltransferase, carbamoyl-P binding	IPR_Domain	IPR006132	EXONT:000001,EXONT:000002,EXONT:001904,EXONT:002438,EXONT:004499
EXONT:004502	DNA-directed DNA polymerase, family B, exonuclease domain	IPR_Domain	IPR006133	EXONT:000001,EXONT:000002,EXONT:000005,EXONT:001904,EXONT:001905,EXONT:001928,EXONT:001929,EXONT:001932,EXONT:002067,EXONT:002068,EXONT:002069,EXONT:002905
EXONT:004503	DNA-directed DNA polymerase, family B, multifunctional domain	IPR_Domain	IPR006134	EXONT:000001,EXONT:000002,EXONT:000005,EXONT:001904,EXONT:001905,EXONT:001928,EXONT:001929,EXONT:001930,EXONT:001932,EXONT:001987,EXONT:001988,EXONT:001997,EXONT:002067,EXONT:002068,EXONT:002069
EXONT:004505	D-isomer specific 2-hydroxyacid dehydrogenase, catalytic domain	IPR_Domain	IPR006139	EXONT:000001,EXONT:000002,EXONT:000005,EXONT:001912,EXONT:001928,EXONT:001932,EXONT:001987,EXONT:001988,EXONT:001997,EXONT:002015,EXONT:002018,EXONT:002019,EXONT:002266,EXONT:002282
EXONT:004510	Pseudouridine synthase, RsuA/RluB/C/D/E/F	IPR_Domain	IPR006145	EXONT:000001,EXONT:000002,EXONT:000005,EXONT:001928,EXONT:001929,EXONT:001932,EXONT:001948,EXONT:002139,EXONT:003207,EXONT:004511,EXONT:004512
EXONT:004511	Pseudouridine synthase activity	GO_molecular_function	GO:0009982	EXONT:000001,EXONT:000002,EXONT:002139,EXONT:003207
EXONT:004512	Pseudouridine synthase, catalytic domain	IPR_Domain	IPR020103	EXONT:000001,EXONT:000002,EXONT:000005,EXONT:001928,EXONT:001929,EXONT:001932,EXONT:001948,EXONT:002139,EXONT:003207,EXONT:004511
EXONT:004513	5'-Nucleotidase, conserved site	IPR_Site	IPR006146	EXONT:000001,EXONT:000002,EXONT:000005,EXONT:001893,EXONT:001928,EXONT:001932,EXONT:001937,EXONT:001938,EXONT:001939,EXONT:001957,EXONT:001987,EXONT:001988,EXONT:001997
EXONT:004521	Methylmalonyl-CoA mutase, C-terminal	IPR_Domain	IPR006159	EXONT:000001,EXONT:000002,EXONT:000005,EXONT:001928,EXONT:001932,EXONT:001937,EXONT:001938,EXONT:001939,EXONT:001988,EXONT:002139,EXONT:002211,EXONT:002678,EXONT:003556,EXONT:004520
EXONT:004525	ERCC4 domain	IPR_Domain	IPR006166	EXONT:000001,EXONT:000002,EXONT:000005,EXONT:000011,EXONT:001893,EXONT:001928,EXONT:001929,EXONT:001930,EXONT:001932,EXONT:001957,EXONT:002081,EXONT:004524
EXONT:004530	3-hydroxyacyl-CoA dehydrogenase, NAD binding	IPR_Domain	IPR006176	EXONT:000001,EXONT:000002,EXONT:000011,EXONT:001912,EXONT:002015,EXONT:002266,EXONT:002478,EXONT:004481
EXONT:004531	3-hydroxyacyl-CoA dehydrogenase, conserved site	IPR_Site	IPR006180	EXONT:000001,EXONT:000002,EXONT:001912,EXONT:002015,EXONT:002266,EXONT:004481
EXONT:004532	Oxidoreductase activity, acting on the CH-NH2 group of donors, oxygen as acceptor	GO_molecular_function	GO:0016641	EXONT:000001,EXONT:000002,EXONT:001912,EXONT:003429
EXONT:004533	D-amino-acid oxidase activity	GO_molecular_function	GO:0003884	EXONT:000001,EXONT:000002,EXONT:001912,EXONT:003429,EXONT:004532
EXONT:004534	D-amino acid oxidase, conserved site	IPR_Site	IPR006181	EXONT:000001,EXONT:000002,EXONT:001912,EXONT:003429,EXONT:004532,EXONT:004533
EXONT:004536	6-phosphogluconate-binding site	IPR_Site	IPR006184	EXONT:000001,EXONT:000002,EXONT:000005,EXONT:001912,EXONT:002015,EXONT:002266,EXONT:004485
EXONT:004537	Serine/threonine-specific protein phosphatase/bis(5-nucleosyl)-tetraphosphatase	IPR_Domain	IPR006186	EXONT:000001,EXONT:000002,EXONT:001893,EXONT:004102
EXONT:004549	Furin-like cysteine-rich domain	IPR_Domain	IPR006211	EXONT:000001,EXONT:000002,EXONT:000003,EXONT:000005,EXONT:000011,EXONT:000012,EXONT:001904,EXONT:001905,EXONT:001906,EXONT:001910,EXONT:001928,EXONT:001932,EXONT:001937,EXONT:001984,EXONT:001985,EXONT:001986,EXONT:001987,EXONT:001988,EXONT:001989,EXONT:001990,EXONT:001991,EXONT:001992,EXONT:001993,EXONT:001994,EXONT:001995,EXONT:001996,EXONT:001997,EXONT:001998,EXONT:001999,EXONT:002242,EXONT:002…
EXONT:004556	Aminomethyltransferase activity	GO_molecular_function	GO:0004047	EXONT:000001,EXONT:000002,EXONT:001904,EXONT:002438,EXONT:002439
EXONT:004557	Glycine cleavage T-protein, N-terminal	IPR_Domain	IPR006222	EXONT:000001,EXONT:000002,EXONT:001904,EXONT:002438,EXONT:002439,EXONT:004556
EXONT:004558	Pseudouridine synthase, RluC/RluD, conserved site	IPR_Site	IPR006224	EXONT:000001,EXONT:000002,EXONT:000005,EXONT:001928,EXONT:001929,EXONT:001932,EXONT:001948,EXONT:002139,EXONT:003207,EXONT:004511
EXONT:004566	Ubiquinol-cytochrome c reductase, iron-sulphur subunit	IPR_Domain	IPR006317	EXONT:000001,EXONT:000002,EXONT:000004,EXONT:001912,EXONT:002363,EXONT:002384,EXONT:002385,EXONT:002386,EXONT:002392,EXONT:002395,EXONT:003214,EXONT:003215,EXONT:003957,EXONT:003958,EXONT:003959
EXONT:004618	Helicase-like, DEXD box c2 type	IPR_Domain	IPR006554	EXONT:000001,EXONT:000002,EXONT:000005,EXONT:001893,EXONT:001928,EXONT:001929,EXONT:001930,EXONT:001932,EXONT:001937,EXONT:001943,EXONT:001944,EXONT:001984,EXONT:001985,EXONT:001986,EXONT:001987,EXONT:001988,EXONT:001989,EXONT:001990,EXONT:001991,EXONT:001992,EXONT:001993,EXONT:001994,EXONT:001995,EXONT:001996,EXONT:001997,EXONT:001998,EXONT:001999,EXONT:002054,EXONT:002055,EXONT:002333,EXONT:002…
EXONT:004619	DEAD2	IPR_Domain	IPR010614	EXONT:000001,EXONT:000002,EXONT:000005,EXONT:001893,EXONT:001928,EXONT:001929,EXONT:001930,EXONT:001932,EXONT:001937,EXONT:001943,EXONT:001944,EXONT:001984,EXONT:001985,EXONT:001986,EXONT:001987,EXONT:001988,EXONT:001989,EXONT:001990,EXONT:001991,EXONT:001992,EXONT:001993,EXONT:001994,EXONT:001995,EXONT:001996,EXONT:001997,EXONT:001998,EXONT:001999,EXONT:002054,EXONT:002055,EXONT:002333,EXONT:002…
EXONT:004620	ATP-dependent helicase, C-terminal	IPR_Domain	IPR006555	EXONT:000001,EXONT:000002,EXONT:000005,EXONT:001893,EXONT:001928,EXONT:001929,EXONT:001932,EXONT:001937,EXONT:001943,EXONT:001944,EXONT:001984,EXONT:001985,EXONT:001986,EXONT:001987,EXONT:001988,EXONT:001989,EXONT:001990,EXONT:001991,EXONT:001992,EXONT:001993,EXONT:001994,EXONT:001995,EXONT:001996,EXONT:001997,EXONT:001998,EXONT:001999,EXONT:002054,EXONT:002055,EXONT:002333,EXONT:002350,EXONT:002…
EXONT:004622	AWS	IPR_Domain	IPR006560	EXONT:000001,EXONT:000002,EXONT:001904,EXONT:002438,EXONT:002439,EXONT:002440,EXONT:002877,EXONT:003687,EXONT:003688,EXONT:003689,EXONT:003690,EXONT:003691
EXONT:004638	BRK domain	IPR_Domain	IPR006576	EXONT:000001,EXONT:000002,EXONT:000005,EXONT:001885,EXONT:001893,EXONT:001943
EXONT:004648	ADAM, cysteine-rich	IPR_Domain	IPR006586	EXONT:000001,EXONT:000002,EXONT:001893,EXONT:001894,EXONT:001897,EXONT:001899,EXONT:002024,EXONT:002361
EXONT:004650	Glycosyl hydrolase, family 13, subfamily, catalytic domain	IPR_Domain	IPR006589	EXONT:000001,EXONT:000002,EXONT:000005,EXONT:000011,EXONT:001937,EXONT:001938,EXONT:002691,EXONT:002692,EXONT:004437
EXONT:004652	RNA polymerase, N-terminal	IPR_Domain	IPR006592	EXONT:000001,EXONT:000002,EXONT:000005,EXONT:001904,EXONT:001905,EXONT:001928,EXONT:001929,EXONT:001930,EXONT:001932,EXONT:002067,EXONT:002072,EXONT:002408
EXONT:004670	Peptidase C19, ubiquitin-specific peptidase, DUSP domain	IPR_Domain	IPR006615	EXONT:000001,EXONT:000002,EXONT:001893,EXONT:001894,EXONT:001897,EXONT:001898,EXONT:002795,EXONT:002901,EXONT:002903
EXONT:004672	Peptidoglycan recognition protein family domain, metazoa/bacteria	IPR_Domain	IPR006619	EXONT:000001,EXONT:000002,EXONT:000005,EXONT:001893,EXONT:001937,EXONT:001938,EXONT:001939,EXONT:001940,EXONT:001941,EXONT:002000,EXONT:003246,EXONT:003247,EXONT:003248
EXONT:004673	Prolyl 4-hydroxylase, alpha subunit	IPR_Domain	IPR006620	EXONT:000001,EXONT:000002,EXONT:000005,EXONT:001912,EXONT:001937,EXONT:001938,EXONT:001939,EXONT:001940,EXONT:001984,EXONT:001988,EXONT:002116,EXONT:002170,EXONT:002211,EXONT:002255,EXONT:002829,EXONT:002831,EXONT:004192,EXONT:004193,EXONT:004194,EXONT:004674,EXONT:004675
EXONT:004690	Elongator protein 3/MiaB/NifB	IPR_Domain	IPR006638	EXONT:000001,EXONT:000002,EXONT:000005,EXONT:002205,EXONT:002206,EXONT:004691
EXONT:004691	Radical SAM	IPR_Domain	IPR007197	EXONT:000001,EXONT:000002,EXONT:000005,EXONT:002205,EXONT:002206
EXONT:004693	YqgF/RNase H-like domain	IPR_Domain	IPR006641	EXONT:000001,EXONT:000002,EXONT:001893,EXONT:001957
EXONT:004699	Adenosine/AMP deaminase active site	IPR_Site	IPR006650	EXONT:000001,EXONT:000002,EXONT:000018,EXONT:002336
EXONT:004704	Molybdopterin oxidoreductase	IPR_Domain	IPR006656	EXONT:000001,EXONT:000002,EXONT:001912
EXONT:004713	TRNA endonuclease-like domain	IPR_Domain	IPR011856	EXONT:000001,EXONT:000002,EXONT:000005,EXONT:001893,EXONT:001928,EXONT:001929,EXONT:001932,EXONT:001957,EXONT:002081
EXONT:004714	TRNA intron endonuclease, catalytic domain-like	IPR_Domain	IPR006677	EXONT:000001,EXONT:000002,EXONT:000005,EXONT:001893,EXONT:001928,EXONT:001929,EXONT:001932,EXONT:001957,EXONT:002081,EXONT:002082,EXONT:002562,EXONT:002565,EXONT:004713,EXONT:004715,EXONT:004716,EXONT:004717,EXONT:004718
EXONT:004715	TRNA-specific ribonuclease activity	GO_molecular_function	GO:0004549	EXONT:000001,EXONT:000002,EXONT:001893,EXONT:001957,EXONT:002081,EXONT:002562
EXONT:004716	TRNA-intron endonuclease activity	GO_molecular_function	GO:0000213	EXONT:000001,EXONT:000002,EXONT:001893,EXONT:001957,EXONT:002081,EXONT:002082,EXONT:002562,EXONT:002565,EXONT:004715,EXONT:004717,EXONT:004718
EXONT:004717	Endoribonuclease activity, producing 3'-phosphomonoesters	GO_molecular_function	GO:0016892	EXONT:000001,EXONT:000002,EXONT:001893,EXONT:001957,EXONT:002081,EXONT:002082,EXONT:002562,EXONT:002565,EXONT:004718
EXONT:004718	Endonuclease activity, active with either ribo- or deoxyribonucleic acids and producing 3'-phosphomonoesters	GO_molecular_function	GO:0016894	EXONT:000001,EXONT:000002,EXONT:001893,EXONT:001957,EXONT:002081,EXONT:002082
EXONT:004719	TRNA intron endonuclease, N-terminal	IPR_Domain	IPR006678	EXONT:000001,EXONT:000002,EXONT:001893,EXONT:001957,EXONT:002081,EXONT:002082,EXONT:002562,EXONT:002565,EXONT:004715,EXONT:004716,EXONT:004717,EXONT:004718
EXONT:004720	Amidohydrolase 1	IPR_Domain	IPR006680	EXONT:000001,EXONT:000002,EXONT:001893
EXONT:004726	Fatty acid hydroxylase	IPR_Domain	IPR006694	EXONT:000001,EXONT:000002,EXONT:000005,EXONT:001912,EXONT:001937,EXONT:001938,EXONT:001939,EXONT:001940,EXONT:002255
EXONT:004752	Glucosylceramidase activity	GO_molecular_function	GO:0004348	EXONT:000001,EXONT:000002,EXONT:001893,EXONT:001920,EXONT:002111
EXONT:004753	Glucosylceramidase	IPR_Domain	IPR006775	EXONT:000001,EXONT:000002,EXONT:001893,EXONT:001920,EXONT:002111,EXONT:004752
EXONT:004761	RRNA methyltransferase activity	GO_molecular_function	GO:0008649	EXONT:000001,EXONT:000002,EXONT:001904,EXONT:002438,EXONT:002439,EXONT:002440,EXONT:002880
EXONT:004792	Fzo/mitofusin HR2 domain	IPR_Domain	IPR006884	EXONT:000001,EXONT:000002,EXONT:001893,EXONT:001943,EXONT:001944,EXONT:002054,EXONT:002055,EXONT:002056
EXONT:004810	Glutathione-dependent formaldehyde-activating enzyme/centromere protein V	IPR_Domain	IPR006913	EXONT:000001,EXONT:000002,EXONT:000011,EXONT:002003,EXONT:003296,EXONT:004811
EXONT:004811	Carbon-sulfur lyase activity	GO_molecular_function	GO:0016846	EXONT:000001,EXONT:000002,EXONT:002003
EXONT:004821	Helicase/UvrB domain	IPR_Domain	IPR006935	EXONT:000001,EXONT:000002,EXONT:000005,EXONT:000011,EXONT:001893,EXONT:001928,EXONT:001929,EXONT:001930,EXONT:001932,EXONT:001937,EXONT:001984,EXONT:001985,EXONT:001986,EXONT:001987,EXONT:001988,EXONT:001989,EXONT:001990,EXONT:001991,EXONT:001992,EXONT:001993,EXONT:001994,EXONT:001995,EXONT:001996,EXONT:001997,EXONT:001998,EXONT:001999,EXONT:004820
EXONT:004846	Poly(A) polymerase, RNA-binding domain	IPR_Domain	IPR007010	EXONT:000001,EXONT:000002,EXONT:000005,EXONT:001904,EXONT:001905,EXONT:001928,EXONT:001929,EXONT:001932,EXONT:001948,EXONT:002067,EXONT:003321,EXONT:004847,EXONT:004848
EXONT:004847	Nucleotidyltransferase, class I, C-terminal-like	IPR_Domain	IPR011068	EXONT:000001,EXONT:000002,EXONT:000005,EXONT:001904,EXONT:001905,EXONT:001928,EXONT:001929,EXONT:001932,EXONT:001948,EXONT:002067
EXONT:004848	Polynucleotide adenylyltransferase activity	GO_molecular_function	GO:0004652	EXONT:000001,EXONT:000002,EXONT:001904,EXONT:001905,EXONT:002067,EXONT:003321
EXONT:004850	Poly(A) polymerase, central domain	IPR_Domain	IPR007012	EXONT:000001,EXONT:000002,EXONT:001904,EXONT:001905,EXONT:002067,EXONT:003321,EXONT:004848
EXONT:004861	Cyclodeaminase/cyclohydrolase	IPR_Domain	IPR007044	EXONT:000001,EXONT:000002
EXONT:004868	RNA polymerase Rpb1, domain 3	IPR_Domain	IPR007066	EXONT:000001,EXONT:000002,EXONT:000005,EXONT:001904,EXONT:001905,EXONT:001928,EXONT:001929,EXONT:001930,EXONT:001932,EXONT:002067,EXONT:002072,EXONT:002408
EXONT:004869	RNA polymerase Rpb1, domain 7	IPR_Domain	IPR007073	EXONT:000001,EXONT:000002,EXONT:000005,EXONT:001904,EXONT:001905,EXONT:001928,EXONT:001929,EXONT:001930,EXONT:001932,EXONT:002067,EXONT:002072,EXONT:002408
EXONT:004870	RNA polymerase Rpb1, domain 6	IPR_Domain	IPR007075	EXONT:000001,EXONT:000002,EXONT:000005,EXONT:001904,EXONT:001905,EXONT:001928,EXONT:001929,EXONT:001930,EXONT:001932,EXONT:002067,EXONT:002072,EXONT:002408
EXONT:004873	RNA polymerase Rpb1, domain 1	IPR_Domain	IPR007080	EXONT:000001,EXONT:000002,EXONT:000005,EXONT:001904,EXONT:001905,EXONT:001928,EXONT:001929,EXONT:001930,EXONT:001932,EXONT:002067,EXONT:002072,EXONT:002408
EXONT:004874	RNA polymerase Rpb1, domain 5	IPR_Domain	IPR007081	EXONT:000001,EXONT:000002,EXONT:000005,EXONT:001904,EXONT:001905,EXONT:001928,EXONT:001929,EXONT:001930,EXONT:001932,EXONT:002067,EXONT:002072,EXONT:002408
EXONT:004875	RNA polymerase Rpb1, domain 4	IPR_Domain	IPR007083	EXONT:000001,EXONT:000002,EXONT:000005,EXONT:001904,EXONT:001905,EXONT:001928,EXONT:001929,EXONT:001930,EXONT:001932,EXONT:002067,EXONT:002072,EXONT:002408
EXONT:004891	DNA-directed RNA polymerase, subunit 2, domain 6	IPR_Domain	IPR007120	EXONT:000001,EXONT:000002,EXONT:000005,EXONT:001904,EXONT:001905,EXONT:001928,EXONT:001929,EXONT:001930,EXONT:001932,EXONT:002067,EXONT:002072,EXONT:002408
EXONT:004892	RNA polymerase, beta subunit, conserved site	IPR_Site	IPR007121	EXONT:000001,EXONT:000002,EXONT:000005,EXONT:001904,EXONT:001905,EXONT:001928,EXONT:001929,EXONT:001930,EXONT:001932,EXONT:002067,EXONT:002072,EXONT:002408
EXONT:004926	DNA polymerase alpha/epsilon, subunit B	IPR_Domain	IPR007185	EXONT:000001,EXONT:000002,EXONT:000005,EXONT:001904,EXONT:001905,EXONT:001928,EXONT:001929,EXONT:001930,EXONT:001932,EXONT:002067,EXONT:002068,EXONT:002069
EXONT:004943	Aminoacyl-tRNA editing activity	GO_molecular_function	GO:0002161	EXONT:000001,EXONT:000002,EXONT:001893,EXONT:001957,EXONT:001958
EXONT:004948	Signal recognition particle receptor, alpha subunit, N-terminal	IPR_Domain	IPR007222	EXONT:000001,EXONT:000002,EXONT:000005,EXONT:001893,EXONT:001928,EXONT:001932,EXONT:001937,EXONT:001943,EXONT:001944,EXONT:001984,EXONT:001985,EXONT:001987,EXONT:001988,EXONT:001989,EXONT:001990,EXONT:001991,EXONT:001992,EXONT:001993,EXONT:001994,EXONT:001995,EXONT:001997,EXONT:001998,EXONT:002054,EXONT:002055,EXONT:002056,EXONT:002090,EXONT:002091,EXONT:002200,EXONT:004946,EXONT:004947
EXONT:004954	Glycosyl transferase, family 28, C-terminal	IPR_Domain	IPR007235	EXONT:000001,EXONT:000002,EXONT:000005,EXONT:001904,EXONT:002041,EXONT:002116,EXONT:003574
EXONT:004962	Mre11, DNA-binding	IPR_Domain	IPR007281	EXONT:000001,EXONT:000002,EXONT:000005,EXONT:001893,EXONT:001937,EXONT:001938,EXONT:001939,EXONT:001940,EXONT:001947,EXONT:001957,EXONT:002081,EXONT:002082
EXONT:004998	Thiamine diphosphokinase activity	GO_molecular_function	GO:0004788	EXONT:000001,EXONT:000002,EXONT:001904,EXONT:001905,EXONT:002294
EXONT:004999	Thiamin pyrophosphokinase, catalytic domain	IPR_Domain	IPR007371	EXONT:000001,EXONT:000002,EXONT:000005,EXONT:001904,EXONT:001905,EXONT:001928,EXONT:001932,EXONT:001937,EXONT:001984,EXONT:001985,EXONT:001986,EXONT:001987,EXONT:001988,EXONT:001989,EXONT:001990,EXONT:001991,EXONT:001992,EXONT:001993,EXONT:001994,EXONT:001995,EXONT:001996,EXONT:001997,EXONT:001998,EXONT:001999,EXONT:002294,EXONT:004998
EXONT:005018	Transferase activity, transferring amino-acyl groups	GO_molecular_function	GO:0016755	EXONT:000001,EXONT:000002,EXONT:001904,EXONT:002032
EXONT:005019	Arginyltransferase activity	GO_molecular_function	GO:0004057	EXONT:000001,EXONT:000002,EXONT:001904,EXONT:002032,EXONT:005018
EXONT:005020	Arginine-tRNA-protein transferase, N-terminal	IPR_Domain	IPR007471	EXONT:000001,EXONT:000002,EXONT:001904,EXONT:002032,EXONT:005018,EXONT:005019
EXONT:005021	Arginine-tRNA-protein transferase, C-terminal	IPR_Domain	IPR007472	EXONT:000001,EXONT:000002,EXONT:001904,EXONT:002032,EXONT:005018,EXONT:005019
EXONT:005030	Helicase-associated domain	IPR_Domain	IPR007502	EXONT:000001,EXONT:000002,EXONT:001893,EXONT:001943,EXONT:001944,EXONT:002054,EXONT:002055,EXONT:002333
EXONT:005035	Rad50 zinc hook	IPR_Domain	IPR007517	EXONT:000001,EXONT:000002,EXONT:000005,EXONT:000011,EXONT:001893,EXONT:001928,EXONT:001932,EXONT:001937,EXONT:001938,EXONT:001939,EXONT:001940,EXONT:001941,EXONT:001957,EXONT:001984,EXONT:001985,EXONT:001986,EXONT:001987,EXONT:001988,EXONT:001989,EXONT:001990,EXONT:001991,EXONT:001992,EXONT:001993,EXONT:001994,EXONT:001995,EXONT:001996,EXONT:001997,EXONT:001998,EXONT:001999,EXONT:002081,EXONT:005…
EXONT:005044	Ligase activity, forming carbon-sulfur bonds	GO_molecular_function	GO:0016877	EXONT:000001,EXONT:000002,EXONT:001902
EXONT:005045	Acid-thiol ligase activity	GO_molecular_function	GO:0016878	EXONT:000001,EXONT:000002,EXONT:001902,EXONT:005044
EXONT:005049	Oxidoreductase activity, acting on single donors with incorporation of molecular oxygen, incorporation of two atoms of oxygen	GO_molecular_function	GO:0016702	EXONT:000001,EXONT:000002,EXONT:001912,EXONT:003903,EXONT:004194
EXONT:005087	Glutaminyl-tRNA synthetase, class Ib, non-specific RNA-binding domain 2	IPR_Domain	IPR007638	EXONT:000001,EXONT:000002,EXONT:000005,EXONT:001902,EXONT:001928,EXONT:001932,EXONT:001937,EXONT:001984,EXONT:001985,EXONT:001986,EXONT:001987,EXONT:001988,EXONT:001989,EXONT:001990,EXONT:001991,EXONT:001992,EXONT:001993,EXONT:001994,EXONT:001995,EXONT:001996,EXONT:001997,EXONT:001998,EXONT:001999,EXONT:002418,EXONT:002419,EXONT:002420,EXONT:005088
EXONT:005088	Glutamine-tRNA ligase activity	GO_molecular_function	GO:0004819	EXONT:000001,EXONT:000002,EXONT:001902,EXONT:002418,EXONT:002419,EXONT:002420
EXONT:005089	Glutaminyl-tRNA synthetase, class Ib, non-specific RNA-binding domain, N-terminal	IPR_Domain	IPR007639	EXONT:000001,EXONT:000002,EXONT:000005,EXONT:001902,EXONT:001928,EXONT:001932,EXONT:001937,EXONT:001984,EXONT:001985,EXONT:001986,EXONT:001987,EXONT:001988,EXONT:001989,EXONT:001990,EXONT:001991,EXONT:001992,EXONT:001993,EXONT:001994,EXONT:001995,EXONT:001996,EXONT:001997,EXONT:001998,EXONT:001999,EXONT:002418,EXONT:002419,EXONT:002420
EXONT:005090	RNA polymerase Rpb2, domain 7	IPR_Domain	IPR007641	EXONT:000001,EXONT:000002,EXONT:000005,EXONT:001904,EXONT:001905,EXONT:001928,EXONT:001929,EXONT:001930,EXONT:001932,EXONT:002067,EXONT:002072,EXONT:002408
EXONT:005091	RNA polymerase Rpb2, domain 2	IPR_Domain	IPR007642	EXONT:000001,EXONT:000002,EXONT:000005,EXONT:001904,EXONT:001905,EXONT:001928,EXONT:001929,EXONT:001930,EXONT:001932,EXONT:002067,EXONT:002072,EXONT:002408
EXONT:005093	RNA polymerase, beta subunit, protrusion	IPR_Domain	IPR007644	EXONT:000001,EXONT:000002,EXONT:000005,EXONT:001904,EXONT:001905,EXONT:001928,EXONT:001929,EXONT:001930,EXONT:001932,EXONT:002067,EXONT:002072,EXONT:002408
EXONT:005094	RNA polymerase Rpb2, domain 3	IPR_Domain	IPR007645	EXONT:000001,EXONT:000002,EXONT:000005,EXONT:001904,EXONT:001905,EXONT:001928,EXONT:001929,EXONT:001930,EXONT:001932,EXONT:002067,EXONT:002072,EXONT:002408
EXONT:005095	RNA polymerase Rpb2, domain 4	IPR_Domain	IPR007646	EXONT:000001,EXONT:000002,EXONT:000005,EXONT:001904,EXONT:001905,EXONT:001928,EXONT:001929,EXONT:001930,EXONT:001932,EXONT:002067,EXONT:002072,EXONT:002408
EXONT:005096	RNA polymerase Rpb2, domain 5	IPR_Domain	IPR007647	EXONT:000001,EXONT:000002,EXONT:000005,EXONT:001904,EXONT:001905,EXONT:001928,EXONT:001929,EXONT:001930,EXONT:001932,EXONT:002067,EXONT:002072,EXONT:002408
EXONT:005120	DNA helicase, DnaB-like, C-terminal	IPR_Domain	IPR007694	EXONT:000001,EXONT:000002,EXONT:000005,EXONT:001893,EXONT:001928,EXONT:001932,EXONT:001937,EXONT:001943,EXONT:001944,EXONT:001984,EXONT:001985,EXONT:001986,EXONT:001987,EXONT:001988,EXONT:001989,EXONT:001990,EXONT:001991,EXONT:001992,EXONT:001993,EXONT:001994,EXONT:001995,EXONT:001996,EXONT:001997,EXONT:001998,EXONT:001999,EXONT:002054,EXONT:002055,EXONT:002333,EXONT:002666
EXONT:005127	Lariat debranching enzyme, C-terminal	IPR_Domain	IPR007708	EXONT:000001,EXONT:000002,EXONT:001893,EXONT:001957
EXONT:005132	MRNA decapping protein 2, Box A	IPR_Domain	IPR007722	EXONT:000001,EXONT:000002,EXONT:000005,EXONT:001893,EXONT:001928,EXONT:001929,EXONT:001932,EXONT:001937,EXONT:001938,EXONT:001939,EXONT:001940,EXONT:001947,EXONT:001948
EXONT:005158	Methyltransferase small domain	IPR_Domain	IPR007848	EXONT:000001,EXONT:000002,EXONT:001904,EXONT:002438,EXONT:002439
EXONT:005165	Adenylate kinase activity	GO_molecular_function	GO:0004017	EXONT:000001,EXONT:000002,EXONT:001904,EXONT:001905,EXONT:001910,EXONT:004037,EXONT:005167,EXONT:005168
EXONT:005166	Adenylate kinase, active site lid domain	IPR_Domain	IPR007862	EXONT:000001,EXONT:000002,EXONT:001904,EXONT:001905,EXONT:001910,EXONT:004037,EXONT:005165,EXONT:005167,EXONT:005168
EXONT:005167	Nucleobase-containing compound kinase activity	GO_molecular_function	GO:0019205	EXONT:000001,EXONT:000002,EXONT:001904,EXONT:001905,EXONT:001910
EXONT:005168	Nucleotide kinase activity	GO_molecular_function	GO:0019201	EXONT:000001,EXONT:000002,EXONT:001904,EXONT:001905,EXONT:001910,EXONT:005167
EXONT:005171	Aminopeptidase P N-terminal domain	IPR_Domain	IPR007865	EXONT:000001,EXONT:000002,EXONT:000005,EXONT:001893,EXONT:001894,EXONT:001897,EXONT:001937,EXONT:001938,EXONT:001939,EXONT:001940,EXONT:001947,EXONT:002026,EXONT:002028
EXONT:005172	Glucose-methanol-choline oxidoreductase, C-terminal	IPR_Domain	IPR007867	EXONT:000001,EXONT:000002,EXONT:001912,EXONT:002015
EXONT:005175	Methyltransferase TRM13	IPR_Domain	IPR007871	EXONT:000001,EXONT:000002,EXONT:001904,EXONT:002438,EXONT:002439
EXONT:005192	APOBEC-like, C-terminal	IPR_Domain	IPR007904	EXONT:000001,EXONT:000002,EXONT:000005,EXONT:001893,EXONT:001937,EXONT:001938,EXONT:001939,EXONT:001940,EXONT:001941,EXONT:002000,EXONT:002339
EXONT:005207	Proteinase inhibitor I19, pacifastin	IPR_Repeat	IPR008037	EXONT:000001,EXONT:000002,EXONT:000007,EXONT:000025,EXONT:000027,EXONT:001887,EXONT:001888,EXONT:001889,EXONT:001893,EXONT:001894,EXONT:001895
EXONT:005220	Glutamine synthetase/guanido kinase, catalytic domain	IPR_Domain	IPR014746	EXONT:000001,EXONT:000002
EXONT:005221	Glutamine synthetase, catalytic domain	IPR_Domain	IPR008146	EXONT:000001,EXONT:000002,EXONT:001902,EXONT:002342,EXONT:005220,EXONT:005222,EXONT:005223,EXONT:005224
EXONT:005222	Acid-ammonia (or amide) ligase activity	GO_molecular_function	GO:0016880	EXONT:000001,EXONT:000002,EXONT:001902,EXONT:002342
EXONT:005223	Ammonia ligase activity	GO_molecular_function	GO:0016211	EXONT:000001,EXONT:000002,EXONT:001902,EXONT:002342,EXONT:005222
EXONT:005224	Glutamate-ammonia ligase activity	GO_molecular_function	GO:0004356	EXONT:000001,EXONT:000002,EXONT:001902,EXONT:002342,EXONT:005222,EXONT:005223
EXONT:005225	Glutamine synthetase, beta-Grasp	IPR_Domain	IPR008147	EXONT:000001,EXONT:000002,EXONT:001902,EXONT:002342,EXONT:005222,EXONT:005223,EXONT:005224
EXONT:005236	DNA-directed RNA polymerase Rpb11, 13-16kDa subunit, conserved site	IPR_Site	IPR008193	EXONT:000001,EXONT:000002,EXONT:000005,EXONT:001904,EXONT:001905,EXONT:001928,EXONT:001929,EXONT:001930,EXONT:001932,EXONT:002067,EXONT:002072,EXONT:002408
EXONT:005237	Whey acidic protein-type 4-disulphide core	IPR_Domain	IPR008197	EXONT:000001,EXONT:000002,EXONT:001887,EXONT:001888,EXONT:001889,EXONT:001893,EXONT:001894,EXONT:001895
EXONT:005240	Phosphoenolpyruvate carboxykinase, N-terminal	IPR_Domain	IPR008210	EXONT:000001,EXONT:000002,EXONT:000005,EXONT:001928,EXONT:001932,EXONT:001987,EXONT:001988,EXONT:001997,EXONT:001998,EXONT:002003,EXONT:002004,EXONT:002117,EXONT:005241
EXONT:005241	Phosphoenolpyruvate carboxykinase activity	GO_molecular_function	GO:0004611	EXONT:000001,EXONT:000002,EXONT:002003,EXONT:002004,EXONT:002117
EXONT:005249	Flavodoxin/nitric oxide synthase	IPR_Domain	IPR008254	EXONT:000001,EXONT:000002,EXONT:000005,EXONT:001912,EXONT:001928,EXONT:001932,EXONT:001937,EXONT:001984,EXONT:001987,EXONT:001988,EXONT:001992,EXONT:001994,EXONT:001997,EXONT:002018,EXONT:002019,EXONT:002658
EXONT:005252	FMN-dependent alpha-hydroxy acid dehydrogenase, active site	IPR_Site	IPR008259	EXONT:000001,EXONT:000002,EXONT:000018,EXONT:001912
EXONT:005256	Lipase, GDSL, active site	IPR_Site	IPR008265	EXONT:000001,EXONT:000002,EXONT:000018,EXONT:001893,EXONT:001957,EXONT:002802
EXONT:005257	Tyrosine-protein kinase, active site	IPR_Site	IPR008266	EXONT:000001,EXONT:000002,EXONT:000018,EXONT:001904,EXONT:001905,EXONT:001906,EXONT:001910,EXONT:002248
EXONT:005258	Peptidase S16, active site	IPR_Site	IPR008268	EXONT:000001,EXONT:000002,EXONT:000018,EXONT:001893,EXONT:001894,EXONT:001897,EXONT:001899,EXONT:001943,EXONT:001944,EXONT:001980,EXONT:001981,EXONT:002054,EXONT:002055,EXONT:002074,EXONT:002350,EXONT:002351,EXONT:003480
EXONT:005259	Peptidase S16, Lon C-terminal	IPR_Domain	IPR008269	EXONT:000001,EXONT:000002,EXONT:000011,EXONT:001893,EXONT:001894,EXONT:001897,EXONT:001899,EXONT:001943,EXONT:001944,EXONT:001980,EXONT:001981,EXONT:002054,EXONT:002055,EXONT:002074,EXONT:002350,EXONT:002351,EXONT:002706,EXONT:003480
EXONT:005262	Serine/threonine-protein kinase, active site	IPR_Site	IPR008271	EXONT:000001,EXONT:000002,EXONT:000018,EXONT:001904,EXONT:001905,EXONT:001906,EXONT:001910,EXONT:002248,EXONT:002249
EXONT:005264	Aldehyde oxidase/xanthine dehydrogenase, molybdopterin binding	IPR_Domain	IPR008274	EXONT:000001,EXONT:000002,EXONT:001912
EXONT:005267	Tubulin/FtsZ, C-terminal	IPR_Domain	IPR008280	EXONT:000001,EXONT:000002,EXONT:000005,EXONT:001893,EXONT:001928,EXONT:001932,EXONT:001937,EXONT:001943,EXONT:001944,EXONT:001984,EXONT:001985,EXONT:001987,EXONT:001988,EXONT:001989,EXONT:001990,EXONT:001991,EXONT:001992,EXONT:001993,EXONT:001994,EXONT:001995,EXONT:001997,EXONT:001998,EXONT:002054,EXONT:002055,EXONT:002056,EXONT:002090,EXONT:002091,EXONT:002200
EXONT:005268	Peptidase M17, leucyl aminopeptidase, N-terminal	IPR_Domain	IPR008283	EXONT:000001,EXONT:000002,EXONT:001893,EXONT:001894,EXONT:001897,EXONT:002026,EXONT:002028
EXONT:005272	Methylguanine DNA methyltransferase, ribonuclease-like	IPR_Domain	IPR008332	EXONT:000001,EXONT:000002,EXONT:001904,EXONT:002438,EXONT:002439,EXONT:002855,EXONT:002856
EXONT:005273	Oxidoreductase, FAD-binding domain	IPR_Domain	IPR008333	EXONT:000001,EXONT:000002,EXONT:001912,EXONT:003463,EXONT:003464
EXONT:005274	5'-Nucleotidase, C-terminal	IPR_Domain	IPR008334	EXONT:000001,EXONT:000002,EXONT:001893
EXONT:005275	DNA topoisomerase I, DNA binding, eukaryotic-type	IPR_Domain	IPR008336	EXONT:000001,EXONT:000002,EXONT:000005,EXONT:001928,EXONT:001929,EXONT:001930,EXONT:001932,EXONT:002139,EXONT:003176,EXONT:005276
EXONT:005276	DNA topoisomerase type I activity	GO_molecular_function	GO:0003917	EXONT:000001,EXONT:000002,EXONT:002139,EXONT:003176
EXONT:005357	RNA polymerase III Rpc82, C -terminal	IPR_Domain	IPR008806	EXONT:000001,EXONT:000002,EXONT:000005,EXONT:001904,EXONT:001905,EXONT:001928,EXONT:001929,EXONT:001930,EXONT:001932,EXONT:002067,EXONT:002072,EXONT:002408
EXONT:005379	Six-hairpin glycosidase-like	IPR_Domain	IPR008928	EXONT:000001,EXONT:000002
EXONT:005384	DALR anticodon binding	IPR_Domain	IPR008909	EXONT:000001,EXONT:000002,EXONT:000005,EXONT:001902,EXONT:001928,EXONT:001932,EXONT:001937,EXONT:001984,EXONT:001985,EXONT:001986,EXONT:001987,EXONT:001988,EXONT:001989,EXONT:001990,EXONT:001991,EXONT:001992,EXONT:001993,EXONT:001994,EXONT:001995,EXONT:001996,EXONT:001997,EXONT:001998,EXONT:001999,EXONT:002418,EXONT:002419,EXONT:002420,EXONT:004214
EXONT:005387	Peptidase M50	IPR_Domain	IPR008915	EXONT:000001,EXONT:000002,EXONT:001893,EXONT:001894,EXONT:001897,EXONT:001899,EXONT:002024,EXONT:002361
EXONT:005390	Helix-hairpin-helix motif, class 2	IPR_Site	IPR008918	EXONT:000001,EXONT:000002,EXONT:000005,EXONT:001928,EXONT:001929,EXONT:001930,EXONT:001932
EXONT:005401	L-Aspartase-like	IPR_Domain	IPR008948	EXONT:000001,EXONT:000002
EXONT:005408	Nuclear receptor coactivator Src-1	IPR_Domain	IPR008955	EXONT:000001,EXONT:000002,EXONT:000011,EXONT:001904,EXONT:002032,EXONT:002033,EXONT:002034,EXONT:002035,EXONT:002036,EXONT:002060,EXONT:002061,EXONT:005407
EXONT:005410	Protein-glutamine gamma-glutamyltransferase activity	GO_molecular_function	GO:0003810	EXONT:000001,EXONT:000002,EXONT:001904,EXONT:002032,EXONT:005018
EXONT:005411	Transglutaminase, C-terminal	IPR_Domain	IPR008958	EXONT:000001,EXONT:000002,EXONT:001904,EXONT:002032,EXONT:005018,EXONT:005410
EXONT:005412	Purple acid phosphatase-like, N-terminal	IPR_Domain	IPR008963	EXONT:000001,EXONT:000002,EXONT:000005,EXONT:001893,EXONT:001937,EXONT:001938,EXONT:001939,EXONT:001957,EXONT:002093,EXONT:002094,EXONT:005413
EXONT:005413	Acid phosphatase activity	GO_molecular_function	GO:0003993	EXONT:000001,EXONT:000002,EXONT:001893,EXONT:001957,EXONT:002093,EXONT:002094
EXONT:005421	PHM/PNGase F domain	IPR_Domain	IPR008977	EXONT:000001,EXONT:000002
EXONT:005425	Myosin S1 fragment, N-terminal	IPR_Domain	IPR008989	EXONT:000001,EXONT:000002,EXONT:000005,EXONT:001885,EXONT:001893,EXONT:001928,EXONT:001932,EXONT:001937,EXONT:001943,EXONT:001944,EXONT:001984,EXONT:001985,EXONT:001986,EXONT:001987,EXONT:001988,EXONT:001989,EXONT:001990,EXONT:001991,EXONT:001992,EXONT:001993,EXONT:001994,EXONT:001995,EXONT:001996,EXONT:001997,EXONT:001998,EXONT:001999,EXONT:002054,EXONT:002055,EXONT:002614,EXONT:002924,EXONT:002…
EXONT:005431	Alanine racemase/group IV decarboxylase, C-terminal	IPR_Domain	IPR009006	EXONT:000001,EXONT:000002
EXONT:005432	Valyl/Leucyl/Isoleucyl-tRNA synthetase, editing domain	IPR_Domain	IPR009008	EXONT:000001,EXONT:000002,EXONT:001893,EXONT:001957,EXONT:001958,EXONT:004943
EXONT:005436	Transketolase, C-terminal/Pyruvate-ferredoxin oxidoreductase, domain II	IPR_Domain	IPR009014	EXONT:000001,EXONT:000002
EXONT:005445	Hydroxymethylglutaryl-CoA reductase, class I/II, substrate-binding	IPR_Domain	IPR009029	EXONT:000001,EXONT:000002,EXONT:000005,EXONT:001912,EXONT:002015,EXONT:002018,EXONT:002019,EXONT:002266
EXONT:005466	Acyl-CoA dehydrogenase/oxidase C-terminal	IPR_Domain	IPR009075	EXONT:000001,EXONT:000002,EXONT:001912,EXONT:002480
EXONT:005470	Aminoacyl-tRNA synthetase, class 1a, anticodon-binding	IPR_Domain	IPR009080	EXONT:000001,EXONT:000002,EXONT:000005,EXONT:001902,EXONT:001928,EXONT:001932,EXONT:001937,EXONT:001984,EXONT:001985,EXONT:001986,EXONT:001987,EXONT:001988,EXONT:001989,EXONT:001990,EXONT:001991,EXONT:001992,EXONT:001993,EXONT:001994,EXONT:001995,EXONT:001996,EXONT:001997,EXONT:001998,EXONT:001999,EXONT:002418,EXONT:002419,EXONT:002420
EXONT:005475	Rab geranylgeranyltransferase, alpha subunit, insert-domain	IPR_Domain	IPR009087	EXONT:000001,EXONT:000002,EXONT:000005,EXONT:001904,EXONT:001937,EXONT:001938,EXONT:001939,EXONT:001940,EXONT:001941,EXONT:003072,EXONT:003125,EXONT:003126,EXONT:005476,EXONT:005477
EXONT:005476	Protein geranylgeranyltransferase activity	GO_molecular_function	GO:0004661	EXONT:000001,EXONT:000002,EXONT:001904,EXONT:003072,EXONT:003125,EXONT:003126
EXONT:005477	Rab geranylgeranyltransferase activity	GO_molecular_function	GO:0004663	EXONT:000001,EXONT:000002,EXONT:001904,EXONT:003072,EXONT:003125,EXONT:003126,EXONT:005476
EXONT:005488	RNA ligase/cyclic nucleotide phosphodiesterase	IPR_Domain	IPR009097	EXONT:000001,EXONT:000002
EXONT:005489	Acyl-CoA dehydrogenase/oxidase, N-terminal and middle domain	IPR_Domain	IPR009100	EXONT:000001,EXONT:000002,EXONT:001912,EXONT:002480
EXONT:005494	Ran GTPase activator activity	GO_molecular_function	GO:0005098	EXONT:000001,EXONT:000002,EXONT:001887,EXONT:001893,EXONT:001943,EXONT:001944,EXONT:002046,EXONT:002047,EXONT:002048,EXONT:002051,EXONT:002052,EXONT:002053,EXONT:002054,EXONT:002055,EXONT:002056
EXONT:005495	Ran-GTPase activating protein 1, C-terminal	IPR_Domain	IPR009109	EXONT:000001,EXONT:000002,EXONT:001887,EXONT:001893,EXONT:001943,EXONT:001944,EXONT:002046,EXONT:002047,EXONT:002048,EXONT:002051,EXONT:002052,EXONT:002053,EXONT:002054,EXONT:002055,EXONT:002056,EXONT:005494
EXONT:005530	PCAF, N-terminal	IPR_Domain	IPR009464	EXONT:000001,EXONT:000002,EXONT:001904,EXONT:002032,EXONT:002033,EXONT:002034,EXONT:002035,EXONT:002036,EXONT:002060,EXONT:002061
EXONT:005533	Exoribonuclease activity	GO_molecular_function	GO:0004532	EXONT:000001,EXONT:000002,EXONT:001893,EXONT:001957,EXONT:002081,EXONT:002562,EXONT:003285
EXONT:005534	Exoribonuclease activity, producing 5'-phosphomonoesters	GO_molecular_function	GO:0016896	EXONT:000001,EXONT:000002,EXONT:001893,EXONT:001957,EXONT:002081,EXONT:002562,EXONT:003285,EXONT:005533,EXONT:005535
EXONT:005535	Exonuclease activity, active with either ribo- or deoxyribonucleic acids and producing 5'-phosphomonoesters	GO_molecular_function	GO:0016796	EXONT:000001,EXONT:000002,EXONT:001893,EXONT:001957,EXONT:002081,EXONT:003285
EXONT:005544	Phosphatidylinositol-4, 5-bisphosphate phosphodiesterase beta, conserved site	IPR_Site	IPR009535	EXONT:000001,EXONT:000002,EXONT:000005,EXONT:001893,EXONT:001937,EXONT:001938,EXONT:001939,EXONT:001957,EXONT:002093,EXONT:002101,EXONT:002802,EXONT:002803,EXONT:002885,EXONT:002886,EXONT:002963
EXONT:005569	RNA polymerase I, Rpa2 specific	IPR_Domain	IPR009674	EXONT:000001,EXONT:000002,EXONT:001904,EXONT:001905,EXONT:002067,EXONT:002072,EXONT:002408
EXONT:005580	Ribonuclease P activity	GO_molecular_function	GO:0004526	EXONT:000001,EXONT:000002,EXONT:001893,EXONT:001957,EXONT:002081,EXONT:002082,EXONT:002562,EXONT:002565,EXONT:002566,EXONT:002567,EXONT:004715
EXONT:005581	Ribonuclease P/MRP, subunit POP1	IPR_Domain	IPR009723	EXONT:000001,EXONT:000002,EXONT:001893,EXONT:001957,EXONT:002081,EXONT:002082,EXONT:002562,EXONT:002565,EXONT:002566,EXONT:002567,EXONT:004715,EXONT:005580
EXONT:005625	HARP domain	IPR_Domain	IPR010003	EXONT:000001,EXONT:000002,EXONT:001893,EXONT:001943,EXONT:001944,EXONT:002054,EXONT:002055,EXONT:002333
EXONT:005659	ADAM-TS Spacer 1	IPR_Domain	IPR010294	EXONT:000001,EXONT:000002,EXONT:001893,EXONT:001894,EXONT:001897,EXONT:001899,EXONT:002024,EXONT:002361
EXONT:005668	TIP49, C-terminal	IPR_Domain	IPR010339	EXONT:000001,EXONT:000002,EXONT:000005,EXONT:001893,EXONT:001928,EXONT:001932,EXONT:001937,EXONT:001943,EXONT:001944,EXONT:001984,EXONT:001985,EXONT:001986,EXONT:001987,EXONT:001988,EXONT:001989,EXONT:001990,EXONT:001991,EXONT:001992,EXONT:001993,EXONT:001994,EXONT:001995,EXONT:001996,EXONT:001997,EXONT:001998,EXONT:001999,EXONT:002054,EXONT:002055,EXONT:002333,EXONT:002666
EXONT:005686	Hormone-sensitive lipase, N-terminal	IPR_Domain	IPR010468	EXONT:000001,EXONT:000002,EXONT:001893,EXONT:001957,EXONT:002802
EXONT:005712	Peroxisomal fatty acyl CoA transporter, transmembrane domain	IPR_Domain	IPR010509	EXONT:000001,EXONT:000002,EXONT:000004,EXONT:000005,EXONT:001893,EXONT:001928,EXONT:001932,EXONT:001937,EXONT:001943,EXONT:001944,EXONT:001984,EXONT:001985,EXONT:001986,EXONT:001987,EXONT:001988,EXONT:001989,EXONT:001990,EXONT:001991,EXONT:001992,EXONT:001993,EXONT:001994,EXONT:001995,EXONT:001996,EXONT:001997,EXONT:001998,EXONT:001999,EXONT:002054,EXONT:002055,EXONT:002350,EXONT:002351,EXONT:002…
EXONT:005714	KEN domain	IPR_Domain	IPR010513	EXONT:000001,EXONT:000002,EXONT:001893,EXONT:001957,EXONT:002081,EXONT:002562
EXONT:005737	Glucose-6-phosphate isomerase activity	GO_molecular_function	GO:0004347	EXONT:000001,EXONT:000002,EXONT:002139,EXONT:002700,EXONT:002701
EXONT:005746	Myotubularin-like phosphatase domain	IPR_Domain	IPR010569	EXONT:000001,EXONT:000002,EXONT:001893,EXONT:001957,EXONT:002093,EXONT:002094
EXONT:005755	Inter-alpha-trypsin inhibitor heavy chain, C-terminal	IPR_Domain	IPR010600	EXONT:000001,EXONT:000002,EXONT:001887,EXONT:001888,EXONT:001889,EXONT:001890,EXONT:001893,EXONT:001894,EXONT:001895,EXONT:001896,EXONT:001897,EXONT:001899,EXONT:001980,EXONT:001981,EXONT:002074,EXONT:002502
EXONT:005757	Mib-herc2	IPR_Domain	IPR010606	EXONT:000001,EXONT:000002,EXONT:000005,EXONT:001904,EXONT:001937,EXONT:001938,EXONT:001939,EXONT:002302
EXONT:005766	FAST kinase leucine-rich	IPR_Domain	IPR010622	EXONT:000001,EXONT:000002,EXONT:001904,EXONT:001905,EXONT:001906,EXONT:001910,EXONT:002248
EXONT:005783	RNA-directed DNA polymerase activity	GO_molecular_function	GO:0003964	EXONT:000001,EXONT:000002,EXONT:001904,EXONT:001905,EXONT:002067,EXONT:002068
EXONT:005787	Zinc finger, DNA glycosylase/AP lyase/isoleucyl tRNA synthetase	IPR_Domain	IPR010663	EXONT:000001,EXONT:000002
EXONT:005792	Bicoid-interacting 3	IPR_Domain	IPR010675	EXONT:000001,EXONT:000002,EXONT:001904,EXONT:002438,EXONT:002439
EXONT:005816	Oxidoreductase activity, acting on a sulfur group of donors, oxygen as acceptor	GO_molecular_function	GO:0016670	EXONT:000001,EXONT:000002,EXONT:001912,EXONT:003020
EXONT:005817	Prenylcysteine lyase	IPR_Domain	IPR010795	EXONT:000001,EXONT:000002,EXONT:001912,EXONT:003020,EXONT:005816
EXONT:005845	PLAC	IPR_Domain	IPR010909	EXONT:000001,EXONT:000002,EXONT:001893,EXONT:001894
EXONT:005857	Myosin tail 2	IPR_Domain	IPR010926	EXONT:000001,EXONT:000002,EXONT:001893,EXONT:001943,EXONT:001944,EXONT:002054,EXONT:002055,EXONT:002924
EXONT:005875	Tetrapyrrole biosynthesis, 5-aminolevulinic acid synthase	IPR_Domain	IPR010961	EXONT:000001,EXONT:000002,EXONT:000005,EXONT:000011,EXONT:001904,EXONT:001928,EXONT:001932,EXONT:001937,EXONT:001984,EXONT:002018,EXONT:002032,EXONT:002033,EXONT:002036,EXONT:002043,EXONT:002357,EXONT:004099,EXONT:005876,EXONT:005877,EXONT:005878
EXONT:005876	N-succinyltransferase activity	GO_molecular_function	GO:0016749	EXONT:000001,EXONT:000002,EXONT:001904,EXONT:002032,EXONT:002033,EXONT:002036,EXONT:005878
EXONT:005877	5-aminolevulinate synthase activity	GO_molecular_function	GO:0003870	EXONT:000001,EXONT:000002,EXONT:001904,EXONT:002032,EXONT:002033,EXONT:002036,EXONT:005876,EXONT:005878
EXONT:005878	Succinyltransferase activity	GO_molecular_function	GO:0016748	EXONT:000001,EXONT:000002,EXONT:001904,EXONT:002032,EXONT:002033
EXONT:005894	HRDC-like	IPR_Domain	IPR010997	EXONT:000001,EXONT:000002,EXONT:000005,EXONT:001928,EXONT:001932,EXONT:001987,EXONT:001988,EXONT:001997
EXONT:005906	Nop2p	IPR_Domain	IPR011023	EXONT:000001,EXONT:000002,EXONT:000005,EXONT:000011,EXONT:001904,EXONT:001928,EXONT:001929,EXONT:001932,EXONT:001948,EXONT:002438,EXONT:002439,EXONT:002440,EXONT:002954
EXONT:005914	Transcription Factor IIF, Rap30/Rap74, interaction	IPR_Domain	IPR011039	EXONT:000001,EXONT:000002
EXONT:005916	Soluble quinoprotein glucose/sorbosone dehydrogenase	IPR_Domain	IPR011041	EXONT:000001,EXONT:000002,EXONT:000011,EXONT:005917
EXONT:005927	Metal-dependent hydrolase, composite domain	IPR_Domain	IPR011059	EXONT:000001,EXONT:000002,EXONT:001893,EXONT:002000
EXONT:005967	Trehalase activity	GO_molecular_function	GO:0015927	EXONT:000001,EXONT:000002,EXONT:001893,EXONT:001920,EXONT:002111
EXONT:005968	Alpha,alpha-trehalase activity	GO_molecular_function	GO:0004555	EXONT:000001,EXONT:000002,EXONT:001893,EXONT:001920,EXONT:002111,EXONT:005967
EXONT:005975	Glycerol-3-phosphate dehydrogenase, NAD-dependent, N-terminal	IPR_Domain	IPR011128	EXONT:000001,EXONT:000002,EXONT:000005,EXONT:000011,EXONT:001912,EXONT:001928,EXONT:001932,EXONT:001987,EXONT:001988,EXONT:001997,EXONT:002015,EXONT:002018,EXONT:002019,EXONT:002266,EXONT:002282,EXONT:002478
EXONT:005978	Scavenger mRNA decapping enzyme, N-terminal	IPR_Domain	IPR011145	EXONT:000001,EXONT:000002,EXONT:001893
EXONT:005979	HIT-like domain	IPR_Domain	IPR011146	EXONT:000001,EXONT:000002
EXONT:005982	Metalloenzyme, LuxS/M16 peptidase-like	IPR_Domain	IPR011249	EXONT:000001,EXONT:000002,EXONT:000005,EXONT:001937,EXONT:001938,EXONT:001939
EXONT:005983	Peptidase M16 domain	IPR_Domain	IPR011237	EXONT:000001,EXONT:000002,EXONT:000005,EXONT:001937,EXONT:001938,EXONT:001939,EXONT:005982
EXONT:005991	DNA-directed RNA polymerase, insert domain	IPR_Domain	IPR011262	EXONT:000001,EXONT:000002,EXONT:000005,EXONT:001885,EXONT:001904,EXONT:001905,EXONT:002067,EXONT:002072,EXONT:002408,EXONT:002777
EXONT:005992	DNA-directed RNA polymerase, RpoA/D/Rpb3-type	IPR_Domain	IPR011263	EXONT:000001,EXONT:000002,EXONT:000005,EXONT:001885,EXONT:001904,EXONT:001905,EXONT:002067,EXONT:002072,EXONT:002408,EXONT:002777,EXONT:005443
EXONT:006022	Oxidoreductase activity, acting on a sulfur group of donors, NAD(P) as acceptor	GO_molecular_function	GO:0016668	EXONT:000001,EXONT:000002,EXONT:001912,EXONT:002123,EXONT:003020
EXONT:006080	NADH:ubiquinone oxidoreductase, 51kDa subunit	IPR_Domain	IPR011538	EXONT:000001,EXONT:000002,EXONT:000005,EXONT:001912,EXONT:002123,EXONT:002205,EXONT:002206,EXONT:002207
EXONT:006085	Peptidase M41, FtsH extracellular	IPR_Domain	IPR011546	EXONT:000001,EXONT:000002,EXONT:000005,EXONT:001893,EXONT:001894,EXONT:001897,EXONT:001899,EXONT:001928,EXONT:001932,EXONT:001937,EXONT:001938,EXONT:001939,EXONT:001940,EXONT:001941,EXONT:001984,EXONT:001985,EXONT:001986,EXONT:001987,EXONT:001988,EXONT:001989,EXONT:001990,EXONT:001991,EXONT:001992,EXONT:001993,EXONT:001994,EXONT:001995,EXONT:001996,EXONT:001997,EXONT:001998,EXONT:001999,EXONT:002…
EXONT:006090	Pyridoxamine 5'-phosphate oxidase-like, FMN-binding domain	IPR_Domain	IPR011576	EXONT:000001,EXONT:000002,EXONT:000005,EXONT:001912,EXONT:001928,EXONT:001932,EXONT:001937,EXONT:001984,EXONT:001987,EXONT:001988,EXONT:001992,EXONT:001994,EXONT:001997,EXONT:002018,EXONT:002019,EXONT:002658,EXONT:003429,EXONT:004532,EXONT:006091
EXONT:006091	Pyridoxamine-phosphate oxidase activity	GO_molecular_function	GO:0004733	EXONT:000001,EXONT:000002,EXONT:001912,EXONT:003429,EXONT:004532
EXONT:006095	Chitinase II	IPR_Domain	IPR011583	EXONT:000001,EXONT:000002,EXONT:000011,EXONT:001893,EXONT:001920,EXONT:002111,EXONT:002410,EXONT:002691,EXONT:002692,EXONT:002693
EXONT:006097	Peptidase C14, caspase domain	IPR_Domain	IPR011600	EXONT:000001,EXONT:000002,EXONT:001893,EXONT:001894,EXONT:001897,EXONT:001898,EXONT:001899,EXONT:002064
EXONT:006104	Catalase core domain	IPR_Domain	IPR011614	EXONT:000001,EXONT:000002,EXONT:000005,EXONT:001912,EXONT:001913,EXONT:001914,EXONT:001928,EXONT:001932,EXONT:002678,EXONT:002679,EXONT:006105
EXONT:006105	Catalase activity	GO_molecular_function	GO:0004096	EXONT:000001,EXONT:000002,EXONT:001912,EXONT:001913,EXONT:001914
EXONT:006132	Guanylate cyclase activity	GO_molecular_function	GO:0004383	EXONT:000001,EXONT:000002,EXONT:002003,EXONT:002598,EXONT:003700
EXONT:006133	Haem NO binding associated	IPR_Domain	IPR011645	EXONT:000001,EXONT:000002,EXONT:002003,EXONT:002598,EXONT:003700,EXONT:006132
EXONT:006153	Glycosyl hydrolase family 38, C-terminal	IPR_Domain	IPR011682	EXONT:000001,EXONT:000002,EXONT:000005,EXONT:001893,EXONT:001920,EXONT:002111,EXONT:002116,EXONT:002330,EXONT:003530
EXONT:006163	ATPase, dynein-related, AAA domain	IPR_Domain	IPR011704	EXONT:000001,EXONT:000002,EXONT:000005,EXONT:001893,EXONT:001928,EXONT:001932,EXONT:001937,EXONT:001943,EXONT:001944,EXONT:001984,EXONT:001985,EXONT:001986,EXONT:001987,EXONT:001988,EXONT:001989,EXONT:001990,EXONT:001991,EXONT:001992,EXONT:001993,EXONT:001994,EXONT:001995,EXONT:001996,EXONT:001997,EXONT:001998,EXONT:001999,EXONT:002054,EXONT:002055,EXONT:002350
EXONT:006165	Multicopper oxidase, type 2	IPR_Domain	IPR011706	EXONT:000001,EXONT:000002,EXONT:000005,EXONT:001912,EXONT:001937,EXONT:001938,EXONT:001939,EXONT:001940,EXONT:002171
EXONT:006174	Tyrosine aminotransferase ubiquitination region	IPR_Domain	IPR011715	EXONT:000001,EXONT:000002,EXONT:000005,EXONT:001904,EXONT:001928,EXONT:001932,EXONT:001937,EXONT:001984,EXONT:002018,EXONT:002357,EXONT:004420,EXONT:004421,EXONT:004422,EXONT:004423
EXONT:006185	Pseudouridine synthase, TruD, insertion domain	IPR_Domain	IPR011760	EXONT:000001,EXONT:000002,EXONT:000005,EXONT:001928,EXONT:001929,EXONT:001932,EXONT:001948,EXONT:002139,EXONT:003207,EXONT:004511
EXONT:006186	Acetyl-coenzyme A carboxyltransferase, N-terminal	IPR_Domain	IPR011762	EXONT:000001,EXONT:000002,EXONT:001902
EXONT:006187	Acetyl-coenzyme A carboxyltransferase, C-terminal	IPR_Domain	IPR011763	EXONT:000001,EXONT:000002,EXONT:001902
EXONT:006188	Biotin carboxylation domain	IPR_Domain	IPR011764	EXONT:000001,EXONT:000002,EXONT:000005,EXONT:001902,EXONT:001928,EXONT:001932,EXONT:001937,EXONT:001984,EXONT:001985,EXONT:001986,EXONT:001987,EXONT:001988,EXONT:001989,EXONT:001990,EXONT:001991,EXONT:001992,EXONT:001993,EXONT:001994,EXONT:001995,EXONT:001996,EXONT:001997,EXONT:001998,EXONT:001999,EXONT:002342,EXONT:006189
EXONT:006189	Biotin carboxylase activity	GO_molecular_function	GO:0004075	EXONT:000001,EXONT:000002,EXONT:001902,EXONT:002342
EXONT:006191	Thiamine pyrophosphate enzyme, C-terminal TPP-binding	IPR_Domain	IPR011766	EXONT:000001,EXONT:000002,EXONT:000005,EXONT:001928,EXONT:001932,EXONT:001937,EXONT:001938,EXONT:001984,EXONT:001988,EXONT:002018,EXONT:002019,EXONT:002208,EXONT:002210,EXONT:002211
EXONT:006192	Glutaredoxin active site	IPR_Site	IPR011767	EXONT:000001,EXONT:000002,EXONT:000004,EXONT:000013,EXONT:000018
EXONT:006206	Glutaredoxin subgroup	IPR_Domain	IPR014025	EXONT:000001,EXONT:000002,EXONT:000004,EXONT:000013,EXONT:001912,EXONT:003020,EXONT:003021,EXONT:003022,EXONT:003137
EXONT:006207	Glutaredoxin, eukaryotic/virial	IPR_Domain	IPR011899	EXONT:000001,EXONT:000002,EXONT:000004,EXONT:000013,EXONT:001912,EXONT:003020,EXONT:003021,EXONT:003022,EXONT:003137,EXONT:006206
EXONT:006214	HAD-superfamily hydrolase, subfamily IIID	IPR_Domain	IPR011943	EXONT:000001,EXONT:000002,EXONT:000005,EXONT:001885,EXONT:001893,EXONT:001957,EXONT:002093,EXONT:002094,EXONT:002095,EXONT:004005
EXONT:006216	FCP1-like phosphatase, phosphatase domain	IPR_Domain	IPR011947	EXONT:000001,EXONT:000002,EXONT:000005,EXONT:001885,EXONT:001893,EXONT:001957,EXONT:002093,EXONT:002094,EXONT:002095,EXONT:004005
EXONT:006217	Dullard phosphatase domain, eukaryotic	IPR_Domain	IPR011948	EXONT:000001,EXONT:000002,EXONT:000005,EXONT:001885,EXONT:001893,EXONT:001957,EXONT:002093,EXONT:002094,EXONT:004005
EXONT:006221	ATPase, V1 complex, subunit H, C-terminal	IPR_Domain	IPR011987	EXONT:000001,EXONT:000002,EXONT:000004,EXONT:001893,EXONT:001943,EXONT:002384,EXONT:002447
EXONT:006241	RNA polymerase subunit, RPB6/omega	IPR_Domain	IPR012293	EXONT:000001,EXONT:000002,EXONT:000005,EXONT:001904,EXONT:001905,EXONT:001928,EXONT:001929,EXONT:001930,EXONT:001932,EXONT:002067,EXONT:002072,EXONT:002408
EXONT:006245	Malate dehydrogenase (decarboxylating) (NAD+) activity	GO_molecular_function	GO:0004471	EXONT:000001,EXONT:000002,EXONT:001912,EXONT:002015,EXONT:002266,EXONT:002710,EXONT:006247
EXONT:006246	Malic enzyme, N-terminal domain	IPR_Domain	IPR012301	EXONT:000001,EXONT:000002,EXONT:001912,EXONT:002015,EXONT:002266,EXONT:002710,EXONT:006245,EXONT:006247
EXONT:006247	Malic enzyme activity	GO_molecular_function	GO:0004470	EXONT:000001,EXONT:000002,EXONT:001912,EXONT:002015,EXONT:002710
EXONT:006248	Malic enzyme, NAD-binding	IPR_Domain	IPR012302	EXONT:000001,EXONT:000002,EXONT:000005,EXONT:000011,EXONT:001912,EXONT:001928,EXONT:001932,EXONT:001987,EXONT:001988,EXONT:001997,EXONT:002015,EXONT:002018,EXONT:002019,EXONT:002266,EXONT:002282,EXONT:002478,EXONT:002710,EXONT:006245,EXONT:006247
EXONT:006250	DNA ligase, ATP-dependent, N-terminal	IPR_Domain	IPR012308	EXONT:000001,EXONT:000002,EXONT:000005,EXONT:001902,EXONT:001928,EXONT:001929,EXONT:001930,EXONT:001932,EXONT:003912,EXONT:003913,EXONT:006251
EXONT:006251	DNA ligase (ATP) activity	GO_molecular_function	GO:0003910	EXONT:000001,EXONT:000002,EXONT:001902,EXONT:003912,EXONT:003913
EXONT:006252	DNA ligase, ATP-dependent, C-terminal	IPR_Domain	IPR012309	EXONT:000001,EXONT:000002,EXONT:000011,EXONT:001902,EXONT:002600,EXONT:003912,EXONT:003913,EXONT:006251
EXONT:006253	DNA ligase, ATP-dependent, central	IPR_Domain	IPR012310	EXONT:000001,EXONT:000002,EXONT:000005,EXONT:001902,EXONT:001928,EXONT:001932,EXONT:001937,EXONT:001984,EXONT:001985,EXONT:001986,EXONT:001987,EXONT:001988,EXONT:001989,EXONT:001990,EXONT:001991,EXONT:001992,EXONT:001993,EXONT:001994,EXONT:001995,EXONT:001996,EXONT:001997,EXONT:001998,EXONT:001999,EXONT:003912,EXONT:003913,EXONT:006251
EXONT:006256	Peptidase M12B, GON-ADAMTSs	IPR_Domain	IPR012314	EXONT:000001,EXONT:000002,EXONT:000005,EXONT:001893,EXONT:001894,EXONT:001897,EXONT:001899,EXONT:001937,EXONT:001938,EXONT:001939,EXONT:001940,EXONT:001941,EXONT:002024,EXONT:002361
EXONT:006259	Poly(ADP-ribose) polymerase, catalytic domain	IPR_Domain	IPR012317	EXONT:000001,EXONT:000002,EXONT:001904,EXONT:002041,EXONT:003315,EXONT:003873
EXONT:006260	DNA glycosylase/AP lyase, catalytic domain	IPR_Domain	IPR012319	EXONT:000001,EXONT:000002,EXONT:000005,EXONT:001893,EXONT:001920,EXONT:001921,EXONT:001928,EXONT:001929,EXONT:001930,EXONT:001932,EXONT:001937,EXONT:001938,EXONT:001939,EXONT:001940,EXONT:001941,EXONT:001957,EXONT:002003,EXONT:002078,EXONT:002079,EXONT:002081,EXONT:002082,EXONT:002083,EXONT:002084,EXONT:002635
EXONT:006277	Six-hairpin glycosidase	IPR_Domain	IPR012341	EXONT:000001,EXONT:000002,EXONT:005379
EXONT:006279	Ribonucleotide reductase-related	IPR_Domain	IPR012348	EXONT:000001,EXONT:000002,EXONT:000011,EXONT:001912,EXONT:005468
EXONT:006300	BDHCT	IPR_Domain	IPR012532	EXONT:000001,EXONT:000002,EXONT:000005,EXONT:001893,EXONT:001928,EXONT:001929,EXONT:001930,EXONT:001932,EXONT:001937,EXONT:001943,EXONT:001944,EXONT:001984,EXONT:001985,EXONT:001986,EXONT:001987,EXONT:001988,EXONT:001989,EXONT:001990,EXONT:001991,EXONT:001992,EXONT:001993,EXONT:001994,EXONT:001995,EXONT:001996,EXONT:001997,EXONT:001998,EXONT:001999
EXONT:006302	DBP10CT	IPR_Domain	IPR012541	EXONT:000001,EXONT:000002,EXONT:000005,EXONT:001893,EXONT:001928,EXONT:001929,EXONT:001932,EXONT:001937,EXONT:001943,EXONT:001944,EXONT:001948,EXONT:001984,EXONT:001985,EXONT:001986,EXONT:001987,EXONT:001988,EXONT:001989,EXONT:001990,EXONT:001991,EXONT:001992,EXONT:001993,EXONT:001994,EXONT:001995,EXONT:001996,EXONT:001997,EXONT:001998,EXONT:001999
EXONT:006303	DTHCT	IPR_Domain	IPR012542	EXONT:000001,EXONT:000002,EXONT:000005,EXONT:001893,EXONT:001928,EXONT:001929,EXONT:001930,EXONT:001932,EXONT:001937,EXONT:001943,EXONT:001944,EXONT:001984,EXONT:001985,EXONT:001986,EXONT:001987,EXONT:001988,EXONT:001989,EXONT:001990,EXONT:001991,EXONT:001992,EXONT:001993,EXONT:001994,EXONT:001995,EXONT:001996,EXONT:001997,EXONT:001998,EXONT:001999,EXONT:002054,EXONT:002055,EXONT:002139,EXONT:002…
EXONT:006308	GUCT	IPR_Domain	IPR012562	EXONT:000001,EXONT:000002,EXONT:000005,EXONT:001893,EXONT:001928,EXONT:001929,EXONT:001932,EXONT:001937,EXONT:001943,EXONT:001944,EXONT:001948,EXONT:001984,EXONT:001985,EXONT:001986,EXONT:001987,EXONT:001988,EXONT:001989,EXONT:001990,EXONT:001991,EXONT:001992,EXONT:001993,EXONT:001994,EXONT:001995,EXONT:001996,EXONT:001997,EXONT:001998,EXONT:001999,EXONT:002054,EXONT:002055,EXONT:002333
EXONT:006313	NUC194	IPR_Domain	IPR012582	EXONT:000001,EXONT:000002,EXONT:000005,EXONT:001904,EXONT:001905,EXONT:001906,EXONT:001910,EXONT:001928,EXONT:001929,EXONT:001930,EXONT:001932,EXONT:001937,EXONT:001984,EXONT:001985,EXONT:001986,EXONT:001987,EXONT:001988,EXONT:001989,EXONT:001990,EXONT:001991,EXONT:001992,EXONT:001993,EXONT:001994,EXONT:001995,EXONT:001996,EXONT:001997,EXONT:001998,EXONT:001999,EXONT:002248,EXONT:002249,EXONT:006…
EXONT:006314	DNA-dependent protein kinase activity	GO_molecular_function	GO:0004677	EXONT:000001,EXONT:000002,EXONT:001904,EXONT:001905,EXONT:001906,EXONT:001910,EXONT:002248,EXONT:002249
EXONT:006316	P68HR	IPR_Repeat	IPR012587	EXONT:000001,EXONT:000002,EXONT:000005,EXONT:000007,EXONT:000015,EXONT:000025,EXONT:000027,EXONT:001893,EXONT:001943,EXONT:001944,EXONT:002054,EXONT:002055,EXONT:002058,EXONT:002333,EXONT:002334
EXONT:006318	POPLD	IPR_Domain	IPR012590	EXONT:000001,EXONT:000002,EXONT:001893,EXONT:001957,EXONT:002081,EXONT:002082,EXONT:002562,EXONT:002565,EXONT:002566,EXONT:002567,EXONT:004715,EXONT:005580
EXONT:006322	Peptidase C1A, propeptide	IPR_Domain	IPR012599	EXONT:000001,EXONT:000002,EXONT:001893,EXONT:001894,EXONT:001897,EXONT:001898,EXONT:001899,EXONT:002064
EXONT:006351	Oxidoreductase activity, acting on other nitrogenous compounds as donors	GO_molecular_function	GO:0016661	EXONT:000001,EXONT:000002,EXONT:001912
EXONT:006352	Oxidoreductase activity, acting on other nitrogenous compounds as donors, with NAD or NADP as acceptor	GO_molecular_function	GO:0046857	EXONT:000001,EXONT:000002,EXONT:001912,EXONT:006351
EXONT:006353	Nitrite reductase [NAD(P)H] activity	GO_molecular_function	GO:0008942	EXONT:000001,EXONT:000002,EXONT:001912,EXONT:006351,EXONT:006352
EXONT:006354	Nitrite reductase [NAD(P)H] large subunit, NirD	IPR_Domain	IPR012748	EXONT:000001,EXONT:000002,EXONT:001912,EXONT:006351,EXONT:006352,EXONT:006353
EXONT:006361	3-oxoacid CoA-transferase, subunit B	IPR_Domain	IPR012791	EXONT:000001,EXONT:000002,EXONT:001904,EXONT:002492,EXONT:003926
EXONT:006362	3-oxoacid CoA-transferase, subunit A	IPR_Domain	IPR012792	EXONT:000001,EXONT:000002,EXONT:001904,EXONT:002492,EXONT:003926
EXONT:006373	Oxidoreductase activity, acting on CH or CH2 groups	GO_molecular_function	GO:0016725	EXONT:000001,EXONT:000002,EXONT:001912
EXONT:006374	Oxidoreductase activity, acting on CH or CH2 groups, disulfide as acceptor	GO_molecular_function	GO:0016728	EXONT:000001,EXONT:000002,EXONT:001912,EXONT:006373
EXONT:006377	Aspartic peptidase, N-terminal	IPR_Domain	IPR012848	EXONT:000001,EXONT:000002,EXONT:001893,EXONT:001894,EXONT:001897,EXONT:001899,EXONT:001925,EXONT:001927
EXONT:006393	Formiminotransferase, N-terminal subdomain	IPR_Domain	IPR012886	EXONT:000001,EXONT:000002,EXONT:000005,EXONT:001904,EXONT:001928,EXONT:001932,EXONT:001937,EXONT:001984,EXONT:001988,EXONT:002211,EXONT:002829,EXONT:002831,EXONT:003420,EXONT:003984,EXONT:003985,EXONT:006394
EXONT:006394	Formiminotransferas, N- and C-terminal subdomains	IPR_Domain	IPR022384	EXONT:000001,EXONT:000002,EXONT:000005,EXONT:001904,EXONT:001928,EXONT:001932,EXONT:001937,EXONT:001984,EXONT:001988,EXONT:002211,EXONT:002829,EXONT:002831,EXONT:003420,EXONT:003984,EXONT:003985
EXONT:006395	L-fucokinase	IPR_Domain	IPR012887	EXONT:000001,EXONT:000002,EXONT:001904,EXONT:001905
EXONT:006411	8-oxoguanine DNA glycosylase, N-terminal	IPR_Domain	IPR012904	EXONT:000001,EXONT:000002,EXONT:000005,EXONT:001893,EXONT:001920,EXONT:001921,EXONT:001922,EXONT:001928,EXONT:001929,EXONT:001930,EXONT:001932,EXONT:001957,EXONT:002003,EXONT:002078,EXONT:002079,EXONT:002081,EXONT:002082,EXONT:002083,EXONT:002084,EXONT:002635,EXONT:006412,EXONT:006413
EXONT:006412	Oxidized purine nucleobase lesion DNA N-glycosylase activity	GO_molecular_function	GO:0008534	EXONT:000001,EXONT:000002,EXONT:001893,EXONT:001920,EXONT:001921,EXONT:001922,EXONT:001957,EXONT:002003,EXONT:002078,EXONT:002079,EXONT:002081,EXONT:002082,EXONT:002083,EXONT:002084,EXONT:006413
EXONT:006413	Oxidized base lesion DNA N-glycosylase activity	GO_molecular_function	GO:0000702	EXONT:000001,EXONT:000002,EXONT:001893,EXONT:001920,EXONT:001921,EXONT:001922
EXONT:006419	Protein serine/threonine phosphatase 2C, C-terminal	IPR_Domain	IPR012911	EXONT:000001,EXONT:000002,EXONT:000005,EXONT:001893,EXONT:001937,EXONT:001938,EXONT:001939,EXONT:001940,EXONT:001946,EXONT:001947,EXONT:001957,EXONT:002093,EXONT:002094,EXONT:002095
EXONT:006424	Ribosomal RNA methyltransferase, Spb1, C-terminal	IPR_Domain	IPR012920	EXONT:000001,EXONT:000002,EXONT:001904,EXONT:002438,EXONT:002439
EXONT:006439	Glucose/Sorbosone dehydrogenase	IPR_Domain	IPR012938	EXONT:000001,EXONT:000002,EXONT:000005,EXONT:001912,EXONT:002015,EXONT:002018,EXONT:002645,EXONT:006440
EXONT:006440	Oxidoreductase activity, acting on the CH-OH group of donors, quinone or similar compound as acceptor	GO_molecular_function	GO:0016901	EXONT:000001,EXONT:000002,EXONT:001912,EXONT:002015
EXONT:006449	Threonyl/alanyl tRNA synthetase, SAD	IPR_Domain	IPR012947	EXONT:000001,EXONT:000002,EXONT:000005,EXONT:001902,EXONT:001928,EXONT:001932,EXONT:001937,EXONT:001984,EXONT:001985,EXONT:001986,EXONT:001987,EXONT:001988,EXONT:001989,EXONT:001990,EXONT:001991,EXONT:001992,EXONT:001993,EXONT:001994,EXONT:001995,EXONT:001996,EXONT:001997,EXONT:001998,EXONT:001999,EXONT:002418,EXONT:002419
EXONT:006457	CHD, C-terminal 2	IPR_Domain	IPR012957	EXONT:000001,EXONT:000002,EXONT:000005,EXONT:001893,EXONT:001928,EXONT:001929,EXONT:001930,EXONT:001932,EXONT:001937,EXONT:001938,EXONT:001939,EXONT:001940,EXONT:001941,EXONT:001943,EXONT:001944,EXONT:001984,EXONT:001985,EXONT:001986,EXONT:001987,EXONT:001988,EXONT:001989,EXONT:001990,EXONT:001991,EXONT:001992,EXONT:001993,EXONT:001994,EXONT:001995,EXONT:001996,EXONT:001997,EXONT:001998,EXONT:001…
EXONT:006458	CHD, N-terminal	IPR_Domain	IPR012958	EXONT:000001,EXONT:000002,EXONT:000005,EXONT:001893,EXONT:001928,EXONT:001929,EXONT:001930,EXONT:001932,EXONT:001937,EXONT:001938,EXONT:001939,EXONT:001940,EXONT:001941,EXONT:001943,EXONT:001944,EXONT:001984,EXONT:001985,EXONT:001986,EXONT:001987,EXONT:001988,EXONT:001989,EXONT:001990,EXONT:001991,EXONT:001992,EXONT:001993,EXONT:001994,EXONT:001995,EXONT:001996,EXONT:001997,EXONT:001998,EXONT:001…
EXONT:006461	DSH, C-terminal	IPR_Domain	IPR012961	EXONT:000001,EXONT:000002,EXONT:000005,EXONT:001893,EXONT:001928,EXONT:001932,EXONT:001937,EXONT:001943,EXONT:001944,EXONT:001984,EXONT:001985,EXONT:001986,EXONT:001987,EXONT:001988,EXONT:001989,EXONT:001990,EXONT:001991,EXONT:001992,EXONT:001993,EXONT:001994,EXONT:001995,EXONT:001996,EXONT:001997,EXONT:001998,EXONT:001999
EXONT:006476	PADR1	IPR_Domain	IPR012982	EXONT:000001,EXONT:000002,EXONT:001904,EXONT:002041,EXONT:003315,EXONT:003873
EXONT:006483	UME	IPR_Domain	IPR012993	EXONT:000001,EXONT:000002,EXONT:001904,EXONT:001905,EXONT:001906,EXONT:001910,EXONT:002248,EXONT:002249
EXONT:006486	Pyridine nucleotide-disulphide oxidoreductase, class I, active site	IPR_Site	IPR012999	EXONT:000001,EXONT:000002,EXONT:000018,EXONT:001912,EXONT:002123,EXONT:003020,EXONT:006022
EXONT:006500	DNA topoisomerase I, DNA binding, mixed alpha/beta motif, eukaryotic-type	IPR_Domain	IPR013030	EXONT:000001,EXONT:000002,EXONT:000005,EXONT:001928,EXONT:001929,EXONT:001930,EXONT:001932,EXONT:002139,EXONT:003176,EXONT:005275,EXONT:005276
EXONT:006502	DNA topoisomerase I, domain 1	IPR_Domain	IPR013034	EXONT:000001,EXONT:000002,EXONT:002139,EXONT:003176,EXONT:005276
EXONT:006503	Phosphoenolpyruvate carboxykinase, C-terminal	IPR_Domain	IPR013035	EXONT:000001,EXONT:000002,EXONT:000005,EXONT:001928,EXONT:001932,EXONT:001987,EXONT:001988,EXONT:001997,EXONT:001998,EXONT:002003,EXONT:002004,EXONT:002117,EXONT:005241
EXONT:006512	Spo11/DNA topoisomerase VI, subunit A, N-terminal	IPR_Domain	IPR013049	EXONT:000001,EXONT:000002,EXONT:000005,EXONT:001928,EXONT:001929,EXONT:001930,EXONT:001932,EXONT:001937,EXONT:001984,EXONT:001985,EXONT:001986,EXONT:001987,EXONT:001988,EXONT:001989,EXONT:001990,EXONT:001991,EXONT:001992,EXONT:001993,EXONT:001994,EXONT:001995,EXONT:001996,EXONT:001997,EXONT:001998,EXONT:001999
EXONT:006518	6-phosphofructo-2-kinase	IPR_Domain	IPR013079	EXONT:000001,EXONT:000002,EXONT:000005,EXONT:001904,EXONT:001905,EXONT:001906,EXONT:001907,EXONT:001910,EXONT:001911,EXONT:001928,EXONT:001932,EXONT:001937,EXONT:001984,EXONT:001985,EXONT:001986,EXONT:001987,EXONT:001988,EXONT:001989,EXONT:001990,EXONT:001991,EXONT:001992,EXONT:001993,EXONT:001994,EXONT:001995,EXONT:001996,EXONT:001997,EXONT:001998,EXONT:001999,EXONT:006519
EXONT:006519	6-phosphofructo-2-kinase activity	GO_molecular_function	GO:0003873	EXONT:000001,EXONT:000002,EXONT:001904,EXONT:001905,EXONT:001906,EXONT:001907,EXONT:001910,EXONT:001911
EXONT:006532	Phospholipase A2, active site	IPR_Site	IPR013090	EXONT:000001,EXONT:000002,EXONT:000018,EXONT:001893,EXONT:001957,EXONT:001958,EXONT:002802,EXONT:002803,EXONT:006533
EXONT:006533	Phospholipase A2 activity	GO_molecular_function	GO:0004623	EXONT:000001,EXONT:000002,EXONT:001893,EXONT:001957,EXONT:001958,EXONT:002802,EXONT:002803
EXONT:006536	Alpha/beta hydrolase fold-3	IPR_Domain	IPR013094	EXONT:000001,EXONT:000002,EXONT:001893
EXONT:006543	Pyrimidine nucleoside phosphorylase, C-terminal	IPR_Domain	IPR013102	EXONT:000001,EXONT:000002,EXONT:001904,EXONT:002041,EXONT:003315
EXONT:006549	Histone methylation DOT1	IPR_Domain	IPR013110	EXONT:000001,EXONT:000002,EXONT:001904,EXONT:002438,EXONT:002439,EXONT:002440,EXONT:002877,EXONT:003687,EXONT:003688,EXONT:003689,EXONT:003690,EXONT:003691
EXONT:006551	FAD-binding 8	IPR_Domain	IPR013112	EXONT:000001,EXONT:000002,EXONT:001912,EXONT:003463,EXONT:003464
EXONT:006559	Ferric reductase, NAD binding	IPR_Domain	IPR013121	EXONT:000001,EXONT:000002,EXONT:001912
EXONT:006561	RNA 2-O ribose methyltransferase, substrate binding	IPR_Domain	IPR013123	EXONT:000001,EXONT:000002,EXONT:001904,EXONT:002438,EXONT:002439
EXONT:006565	N-acetylneuraminic acid synthase, N-terminal	IPR_Domain	IPR013132	EXONT:000001,EXONT:000002,EXONT:002130
EXONT:006577	Alcohol dehydrogenase, C-terminal	IPR_Domain	IPR013149	EXONT:000001,EXONT:000002,EXONT:000005,EXONT:001912,EXONT:001937,EXONT:001938,EXONT:001939,EXONT:001940,EXONT:001941
EXONT:006583	Alcohol dehydrogenase GroES-like	IPR_Domain	IPR013154	EXONT:000001,EXONT:000002,EXONT:000011,EXONT:001912,EXONT:005910
EXONT:006584	Valyl/Leucyl/Isoleucyl-tRNA synthetase, class I, anticodon-binding	IPR_Domain	IPR013155	EXONT:000001,EXONT:000002,EXONT:000005,EXONT:001902,EXONT:001928,EXONT:001932,EXONT:001937,EXONT:001984,EXONT:001985,EXONT:001986,EXONT:001987,EXONT:001988,EXONT:001989,EXONT:001990,EXONT:001991,EXONT:001992,EXONT:001993,EXONT:001994,EXONT:001995,EXONT:001996,EXONT:001997,EXONT:001998,EXONT:001999,EXONT:002418,EXONT:002419,EXONT:002420,EXONT:005470
EXONT:006585	APOBEC-like, N-terminal	IPR_Domain	IPR013158	EXONT:000001,EXONT:000002,EXONT:000005,EXONT:001893,EXONT:001937,EXONT:001938,EXONT:001939,EXONT:001940,EXONT:001941,EXONT:002000,EXONT:002339
EXONT:006594	Cytidine deaminase activity	GO_molecular_function	GO:0004126	EXONT:000001,EXONT:000002,EXONT:001893,EXONT:002000,EXONT:002336,EXONT:002339
EXONT:006595	Cytidine/deoxycytidylate deaminase, zinc-binding domain	IPR_Domain	IPR013171	EXONT:000001,EXONT:000002,EXONT:000005,EXONT:001893,EXONT:001937,EXONT:001938,EXONT:001939,EXONT:001940,EXONT:001941,EXONT:002000,EXONT:002336,EXONT:002339,EXONT:006594
EXONT:006622	Methyltransferase type 11	IPR_Domain	IPR013216	EXONT:000001,EXONT:000002,EXONT:001904,EXONT:002438,EXONT:002439
EXONT:006643	SRI, Set2 Rpb1 interacting	IPR_Domain	IPR013257	EXONT:000001,EXONT:000002,EXONT:001904,EXONT:002438,EXONT:002439,EXONT:002440,EXONT:002877,EXONT:003687,EXONT:003688,EXONT:003689,EXONT:003690,EXONT:003691
EXONT:006652	SIAH-type domain	IPR_Domain	IPR013323	EXONT:000001,EXONT:000002,EXONT:000005,EXONT:001904,EXONT:001937,EXONT:001938,EXONT:001939,EXONT:001940,EXONT:001941,EXONT:002302
EXONT:006680	DNA topoisomerase, type IA, central	IPR_Domain	IPR013497	EXONT:000001,EXONT:000002,EXONT:000005,EXONT:001928,EXONT:001929,EXONT:001930,EXONT:001932,EXONT:002139,EXONT:003176
EXONT:006681	DNA topoisomerase, type IA, zn finger	IPR_Domain	IPR013498	EXONT:000001,EXONT:000002,EXONT:000005,EXONT:001928,EXONT:001929,EXONT:001930,EXONT:001932,EXONT:002139,EXONT:003176
EXONT:006682	DNA topoisomerase I, eukaryotic-type	IPR_Domain	IPR013499	EXONT:000001,EXONT:000002,EXONT:000005,EXONT:001928,EXONT:001929,EXONT:001930,EXONT:001932,EXONT:002139,EXONT:003176,EXONT:005276
EXONT:006683	DNA topoisomerase I, catalytic core, eukaryotic-type	IPR_Domain	IPR013500	EXONT:000001,EXONT:000002,EXONT:000005,EXONT:001893,EXONT:001928,EXONT:001929,EXONT:001930,EXONT:001932,EXONT:001943,EXONT:001944,EXONT:002054,EXONT:002055,EXONT:002139,EXONT:002350,EXONT:002351,EXONT:002668,EXONT:003176,EXONT:003177,EXONT:003178
EXONT:006686	DNA topoisomerase, type IIA, subunit B, domain 2	IPR_Domain	IPR013506	EXONT:000001,EXONT:000002,EXONT:000005,EXONT:000011,EXONT:001893,EXONT:001928,EXONT:001929,EXONT:001930,EXONT:001932,EXONT:001937,EXONT:001943,EXONT:001944,EXONT:001984,EXONT:001985,EXONT:001986,EXONT:001987,EXONT:001988,EXONT:001989,EXONT:001990,EXONT:001991,EXONT:001992,EXONT:001993,EXONT:001994,EXONT:001995,EXONT:001996,EXONT:001997,EXONT:001998,EXONT:001999,EXONT:002054,EXONT:002055,EXONT:002…
EXONT:006688	Ribonucleoside-diphosphate reductase activity, thioredoxin disulfide as acceptor	GO_molecular_function	GO:0004748	EXONT:000001,EXONT:000002,EXONT:001912,EXONT:006373,EXONT:006374
EXONT:006689	Ribonucleotide reductase large subunit, N-terminal	IPR_Domain	IPR013509	EXONT:000001,EXONT:000002,EXONT:000005,EXONT:001912,EXONT:001928,EXONT:001932,EXONT:001937,EXONT:001984,EXONT:001985,EXONT:001986,EXONT:001987,EXONT:001988,EXONT:001989,EXONT:001990,EXONT:001991,EXONT:001992,EXONT:001993,EXONT:001994,EXONT:001995,EXONT:001996,EXONT:001997,EXONT:001998,EXONT:001999,EXONT:006373,EXONT:006374,EXONT:006688
EXONT:006702	Hydroxymethylglutaryl-coenzyme A synthase, N-terminal	IPR_Domain	IPR013528	EXONT:000001,EXONT:000002,EXONT:001904,EXONT:002032,EXONT:002317,EXONT:002318
EXONT:006704	Hydrolase activity, acting on carbon-nitrogen (but not peptide) bonds, in linear amidines	GO_molecular_function	GO:0016813	EXONT:000001,EXONT:000002,EXONT:001893,EXONT:002000
EXONT:006705	Protein-arginine deiminase activity	GO_molecular_function	GO:0004668	EXONT:000001,EXONT:000002,EXONT:001893,EXONT:002000,EXONT:006704
EXONT:006706	Protein-arginine deiminase, C-terminal	IPR_Domain	IPR013530	EXONT:000001,EXONT:000002,EXONT:000005,EXONT:001893,EXONT:001937,EXONT:001938,EXONT:001939,EXONT:002000,EXONT:002101,EXONT:006704,EXONT:006705
EXONT:006712	Ligase activity, forming carbon-carbon bonds	GO_molecular_function	GO:0016885	EXONT:000001,EXONT:000002,EXONT:001902
EXONT:006713	CoA carboxylase activity	GO_molecular_function	GO:0016421	EXONT:000001,EXONT:000002,EXONT:001902,EXONT:006712
EXONT:006714	Acetyl-CoA carboxylase activity	GO_molecular_function	GO:0003989	EXONT:000001,EXONT:000002,EXONT:001902,EXONT:006712,EXONT:006713
EXONT:006715	Acetyl-CoA carboxylase, central domain	IPR_Domain	IPR013537	EXONT:000001,EXONT:000002,EXONT:000005,EXONT:001902,EXONT:001928,EXONT:001932,EXONT:001937,EXONT:001984,EXONT:001985,EXONT:001986,EXONT:001987,EXONT:001988,EXONT:001989,EXONT:001990,EXONT:001991,EXONT:001992,EXONT:001993,EXONT:001994,EXONT:001995,EXONT:001996,EXONT:001997,EXONT:001998,EXONT:001999,EXONT:006712,EXONT:006713,EXONT:006714
EXONT:006721	Calcium/calmodulin-dependent protein kinase II, association-domain	IPR_Domain	IPR013543	EXONT:000001,EXONT:000002,EXONT:000005,EXONT:001885,EXONT:001904,EXONT:001905,EXONT:001906,EXONT:001910,EXONT:002248,EXONT:002249,EXONT:003936,EXONT:006722
EXONT:006722	Calmodulin-dependent protein kinase activity	GO_molecular_function	GO:0004683	EXONT:000001,EXONT:000002,EXONT:001904,EXONT:001905,EXONT:001906,EXONT:001910,EXONT:002248,EXONT:002249
EXONT:006726	Prolyl 4-hydroxylase alpha-subunit, N-terminal	IPR_Domain	IPR013547	EXONT:000001,EXONT:000002,EXONT:001912,EXONT:002170,EXONT:003903,EXONT:004193,EXONT:004194,EXONT:005049,EXONT:006727,EXONT:006728,EXONT:006729,EXONT:006730
EXONT:006727	Peptidyl-proline dioxygenase activity	GO_molecular_function	GO:0031543	EXONT:000001,EXONT:000002,EXONT:001912,EXONT:002170,EXONT:004193,EXONT:004194
EXONT:006728	Procollagen-proline dioxygenase activity	GO_molecular_function	GO:0019798	EXONT:000001,EXONT:000002,EXONT:001912,EXONT:002170,EXONT:004193,EXONT:004194,EXONT:006727
EXONT:006729	Procollagen-proline 4-dioxygenase activity	GO_molecular_function	GO:0004656	EXONT:000001,EXONT:000002,EXONT:001912,EXONT:002170,EXONT:004193,EXONT:004194,EXONT:006727,EXONT:006728,EXONT:006730
EXONT:006730	Peptidyl-proline 4-dioxygenase activity	GO_molecular_function	GO:0031545	EXONT:000001,EXONT:000002,EXONT:001912,EXONT:002170,EXONT:004193,EXONT:004194,EXONT:006727
EXONT:006767	26S proteasome regulatory subunit, C-terminal	IPR_Domain	IPR013586	EXONT:000001,EXONT:000002,EXONT:001887
EXONT:006816	Lysine-specific demethylase-like domain	IPR_Domain	IPR013637	EXONT:000001,EXONT:000002,EXONT:001912,EXONT:002170,EXONT:004193,EXONT:004194
EXONT:006850	Nucleoside kinase activity	GO_molecular_function	GO:0019206	EXONT:000001,EXONT:000002,EXONT:001904,EXONT:001905,EXONT:001910,EXONT:005167
EXONT:006851	Deoxynucleoside kinase activity	GO_molecular_function	GO:0019136	EXONT:000001,EXONT:000002,EXONT:001904,EXONT:001905,EXONT:001910,EXONT:005167,EXONT:006850
EXONT:006852	Thymidine kinase activity	GO_molecular_function	GO:0004797	EXONT:000001,EXONT:000002,EXONT:001904,EXONT:001905,EXONT:001910,EXONT:005167,EXONT:006850,EXONT:006851
EXONT:006884	DNA polymerase epsilon, catalytic subunit A, C-terminal	IPR_Domain	IPR013697	EXONT:000001,EXONT:000002,EXONT:000005,EXONT:001904,EXONT:001905,EXONT:001937,EXONT:001938,EXONT:001939,EXONT:001940,EXONT:001941,EXONT:002067,EXONT:002068,EXONT:002069
EXONT:006885	Squalene epoxidase	IPR_Domain	IPR013698	EXONT:000001,EXONT:000002,EXONT:000005,EXONT:001912,EXONT:001928,EXONT:001932,EXONT:001937,EXONT:001984,EXONT:001987,EXONT:001988,EXONT:001997,EXONT:002017,EXONT:002018,EXONT:002019,EXONT:002167,EXONT:002170,EXONT:003840,EXONT:006886
EXONT:006886	Squalene monooxygenase activity	GO_molecular_function	GO:0004506	EXONT:000001,EXONT:000002,EXONT:001912,EXONT:002167,EXONT:002170,EXONT:003840
EXONT:006894	3'5'-cyclic nucleotide phosphodiesterase N-terminal	IPR_Domain	IPR013706	EXONT:000001,EXONT:000002,EXONT:001893,EXONT:001957,EXONT:002093,EXONT:002886,EXONT:003114,EXONT:003115
EXONT:006911	DNA clamp loader activity	GO_molecular_function	GO:0003689	EXONT:000001,EXONT:000002,EXONT:000005,EXONT:001893,EXONT:001928,EXONT:001929,EXONT:001930,EXONT:001932,EXONT:001943,EXONT:001944,EXONT:002054,EXONT:002055,EXONT:002350,EXONT:002351,EXONT:002668,EXONT:006913
EXONT:006912	DNA replication factor RFC1, C-terminal	IPR_Domain	IPR013725	EXONT:000001,EXONT:000002,EXONT:000005,EXONT:001893,EXONT:001928,EXONT:001929,EXONT:001930,EXONT:001932,EXONT:001937,EXONT:001943,EXONT:001944,EXONT:001984,EXONT:001985,EXONT:001986,EXONT:001987,EXONT:001988,EXONT:001989,EXONT:001990,EXONT:001991,EXONT:001992,EXONT:001993,EXONT:001994,EXONT:001995,EXONT:001996,EXONT:001997,EXONT:001998,EXONT:001999,EXONT:002054,EXONT:002055,EXONT:002350,EXONT:002…
EXONT:006913	Protein-DNA loading ATPase activity	GO_molecular_function	GO:0033170	EXONT:000001,EXONT:000002,EXONT:001893,EXONT:001943,EXONT:001944,EXONT:002054,EXONT:002055,EXONT:002350,EXONT:002351,EXONT:002668
EXONT:006918	Protein-arginine deiminase (PAD) N-terminal	IPR_Domain	IPR013732	EXONT:000001,EXONT:000002,EXONT:000005,EXONT:000011,EXONT:001893,EXONT:001937,EXONT:001938,EXONT:001939,EXONT:002000,EXONT:002101,EXONT:002526,EXONT:006704,EXONT:006705
EXONT:006919	Protein-arginine deiminase (PAD), central domain	IPR_Domain	IPR013733	EXONT:000001,EXONT:000002,EXONT:000005,EXONT:001893,EXONT:001937,EXONT:001938,EXONT:001939,EXONT:002000,EXONT:002101,EXONT:006704,EXONT:006705
EXONT:006926	Redoxin	IPR_Domain	IPR013740	EXONT:000001,EXONT:000002,EXONT:000011,EXONT:001912,EXONT:002495
EXONT:006928	Hydroxymethylglutaryl-coenzyme A synthase C-terminal	IPR_Domain	IPR013746	EXONT:000001,EXONT:000002,EXONT:001904,EXONT:002032,EXONT:002317,EXONT:002318
EXONT:006932	3-oxoacyl-[acyl-carrier-protein] synthase activity	GO_molecular_function	GO:0004315	EXONT:000001,EXONT:000002,EXONT:001904,EXONT:002032,EXONT:002033,EXONT:003813
EXONT:006938	Type IIA DNA topoisomerase subunit A, alpha-helical domain	IPR_Domain	IPR013757	EXONT:000001,EXONT:000002,EXONT:000005,EXONT:001893,EXONT:001928,EXONT:001929,EXONT:001930,EXONT:001932,EXONT:001937,EXONT:001943,EXONT:001944,EXONT:001984,EXONT:001985,EXONT:001986,EXONT:001987,EXONT:001988,EXONT:001989,EXONT:001990,EXONT:001991,EXONT:001992,EXONT:001993,EXONT:001994,EXONT:001995,EXONT:001996,EXONT:001997,EXONT:001998,EXONT:001999,EXONT:002054,EXONT:002055,EXONT:002139,EXONT:002…
EXONT:006939	DNA topoisomerase, type IIA, subunit A/ C-terminal, alpha-beta	IPR_Domain	IPR013758	EXONT:000001,EXONT:000002,EXONT:000005,EXONT:001893,EXONT:001928,EXONT:001929,EXONT:001930,EXONT:001932,EXONT:001937,EXONT:001943,EXONT:001944,EXONT:001984,EXONT:001985,EXONT:001986,EXONT:001987,EXONT:001988,EXONT:001989,EXONT:001990,EXONT:001991,EXONT:001992,EXONT:001993,EXONT:001994,EXONT:001995,EXONT:001996,EXONT:001997,EXONT:001998,EXONT:001999,EXONT:002054,EXONT:002055,EXONT:002139,EXONT:002…
EXONT:006940	DNA topoisomerase, type IIA, central domain	IPR_Domain	IPR013759	EXONT:000001,EXONT:000002,EXONT:000005,EXONT:001893,EXONT:001928,EXONT:001929,EXONT:001930,EXONT:001932,EXONT:001937,EXONT:001943,EXONT:001944,EXONT:001984,EXONT:001985,EXONT:001986,EXONT:001987,EXONT:001988,EXONT:001989,EXONT:001990,EXONT:001991,EXONT:001992,EXONT:001993,EXONT:001994,EXONT:001995,EXONT:001996,EXONT:001997,EXONT:001998,EXONT:001999,EXONT:002054,EXONT:002055,EXONT:002139,EXONT:002…
EXONT:006941	DNA topoisomerase, type IIA-like domain	IPR_Domain	IPR013760	EXONT:000001,EXONT:000002,EXONT:000005,EXONT:001893,EXONT:001928,EXONT:001932,EXONT:001937,EXONT:001943,EXONT:001944,EXONT:001984,EXONT:001985,EXONT:001986,EXONT:001987,EXONT:001988,EXONT:001989,EXONT:001990,EXONT:001991,EXONT:001992,EXONT:001993,EXONT:001994,EXONT:001995,EXONT:001996,EXONT:001997,EXONT:001998,EXONT:001999,EXONT:002054,EXONT:002055,EXONT:002139,EXONT:002350,EXONT:002351,EXONT:002…
EXONT:006947	Acyl-CoA dehydrogenase/oxidase, N-terminal	IPR_Domain	IPR013786	EXONT:000001,EXONT:000002,EXONT:000005,EXONT:001912,EXONT:001928,EXONT:001932,EXONT:001937,EXONT:001984,EXONT:001987,EXONT:001988,EXONT:001997,EXONT:002017,EXONT:002018,EXONT:002019,EXONT:002480
EXONT:006958	Formiminotransferase, C-terminal subdomain	IPR_Domain	IPR013802	EXONT:000001,EXONT:000002,EXONT:000005,EXONT:001904,EXONT:001928,EXONT:001932,EXONT:001937,EXONT:001984,EXONT:001988,EXONT:002211,EXONT:002829,EXONT:002831,EXONT:003420,EXONT:003984,EXONT:003985,EXONT:006394
EXONT:006965	ATP-grasp fold, subdomain 1	IPR_Domain	IPR013815	EXONT:000001,EXONT:000002,EXONT:000005,EXONT:001928,EXONT:001932,EXONT:001937,EXONT:001984,EXONT:001985,EXONT:001986,EXONT:001987,EXONT:001988,EXONT:001989,EXONT:001990,EXONT:001991,EXONT:001992,EXONT:001993,EXONT:001994,EXONT:001995,EXONT:001996,EXONT:001997,EXONT:001998,EXONT:001999
EXONT:006968	Lipoxygenase, C-terminal	IPR_Domain	IPR013819	EXONT:000001,EXONT:000002,EXONT:000005,EXONT:001912,EXONT:001937,EXONT:001938,EXONT:001939,EXONT:003903,EXONT:004194,EXONT:005049
EXONT:006979	SGNH hydrolase-type esterase domain	IPR_Domain	IPR013831	EXONT:000001,EXONT:000002,EXONT:001893
EXONT:006988	MRNA capping enzyme, C-terminal	IPR_Domain	IPR013846	EXONT:000001,EXONT:000002,EXONT:001904,EXONT:001905,EXONT:002067,EXONT:002757,EXONT:002758,EXONT:002759
EXONT:006990	Methylthiotransferase, N-terminal	IPR_Domain	IPR013848	EXONT:000001,EXONT:000002,EXONT:000005,EXONT:002205,EXONT:002206,EXONT:002207
EXONT:007050	Rad54, N-terminal	IPR_Domain	IPR013967	EXONT:000001,EXONT:000002,EXONT:001893,EXONT:001943
EXONT:007072	Zinc finger, N-recognin, metazoa	IPR_Domain	IPR013993	EXONT:000001,EXONT:000002,EXONT:000005,EXONT:001904,EXONT:001937,EXONT:001938,EXONT:001939,EXONT:001940,EXONT:001941,EXONT:002302,EXONT:003495
EXONT:007088	DNA helicase, UvrD-like, C-terminal	IPR_Domain	IPR014017	EXONT:000001,EXONT:000002,EXONT:000005,EXONT:001893,EXONT:001928,EXONT:001932,EXONT:001937,EXONT:001984,EXONT:001985,EXONT:001986,EXONT:001987,EXONT:001988,EXONT:001989,EXONT:001990,EXONT:001991,EXONT:001992,EXONT:001993,EXONT:001994,EXONT:001995,EXONT:001996,EXONT:001997,EXONT:001998,EXONT:001999
EXONT:007094	UDP-glucose/GDP-mannose dehydrogenase, dimerisation	IPR_Domain	IPR014026	EXONT:000001,EXONT:000002,EXONT:000005,EXONT:000011,EXONT:001912,EXONT:001928,EXONT:001932,EXONT:001987,EXONT:001988,EXONT:001997,EXONT:002015,EXONT:002018,EXONT:002019,EXONT:002266,EXONT:002282,EXONT:003629
EXONT:007095	UDP-glucose/GDP-mannose dehydrogenase, C-terminal	IPR_Domain	IPR014027	EXONT:000001,EXONT:000002,EXONT:000005,EXONT:001912,EXONT:001928,EXONT:001932,EXONT:001987,EXONT:001988,EXONT:001997,EXONT:002015,EXONT:002018,EXONT:002019,EXONT:002266,EXONT:002282
EXONT:007096	NADH:ubiquinone oxidoreductase, 49kDa subunit, conserved site	IPR_Site	IPR014029	EXONT:000001,EXONT:000002,EXONT:001912,EXONT:002123
EXONT:007105	Glutathione synthase, alpha-helical, eukaryotic	IPR_Domain	IPR014042	EXONT:000001,EXONT:000002,EXONT:000005,EXONT:001902,EXONT:001928,EXONT:001932,EXONT:001937,EXONT:001984,EXONT:001985,EXONT:001986,EXONT:001987,EXONT:001988,EXONT:001989,EXONT:001990,EXONT:001991,EXONT:001992,EXONT:001993,EXONT:001994,EXONT:001995,EXONT:001996,EXONT:001997,EXONT:001998,EXONT:001999,EXONT:002342,EXONT:002343,EXONT:003977
EXONT:007106	Acyl transferase	IPR_Domain	IPR014043	EXONT:000001,EXONT:000002,EXONT:000011,EXONT:001904,EXONT:002695,EXONT:002696
EXONT:007108	Methylated-DNA-[protein]-cysteine S-methyltransferase, DNA binding	IPR_Domain	IPR014048	EXONT:000001,EXONT:000002,EXONT:000011,EXONT:002099
EXONT:007109	Glutathione synthase, N-terminal, eukaryotic	IPR_Domain	IPR014049	EXONT:000001,EXONT:000002,EXONT:000005,EXONT:001902,EXONT:001928,EXONT:001932,EXONT:001937,EXONT:001984,EXONT:001985,EXONT:001986,EXONT:001987,EXONT:001988,EXONT:001989,EXONT:001990,EXONT:001991,EXONT:001992,EXONT:001993,EXONT:001994,EXONT:001995,EXONT:001996,EXONT:001997,EXONT:001998,EXONT:001999,EXONT:002342,EXONT:002343,EXONT:003977
EXONT:007127	Xanthine dehydrogenase, small subunit	IPR_Domain	IPR014307	EXONT:000001,EXONT:000002,EXONT:000005,EXONT:001912,EXONT:001928,EXONT:001932,EXONT:001937,EXONT:001984,EXONT:001987,EXONT:001988,EXONT:001997,EXONT:002017,EXONT:002018,EXONT:002019,EXONT:006373,EXONT:007128,EXONT:007129,EXONT:007130,EXONT:007131
EXONT:007128	Oxidoreductase activity, acting on CH or CH2 groups, NAD or NADP as acceptor	GO_molecular_function	GO:0016726	EXONT:000001,EXONT:000002,EXONT:001912,EXONT:006373
EXONT:007129	Xanthine dehydrogenase activity	GO_molecular_function	GO:0004854	EXONT:000001,EXONT:000002,EXONT:001912,EXONT:006373,EXONT:007128
EXONT:007130	Oxidoreductase activity, acting on CH or CH2 groups, oxygen as acceptor	GO_molecular_function	GO:0016727	EXONT:000001,EXONT:000002,EXONT:001912,EXONT:006373
EXONT:007131	Xanthine oxidase activity	GO_molecular_function	GO:0004855	EXONT:000001,EXONT:000002,EXONT:001912,EXONT:006373,EXONT:007130
EXONT:007134	Cobalamin (vitamin B12)-dependent enzyme, catalytic subdomain	IPR_Domain	IPR014348	EXONT:000001,EXONT:000002,EXONT:000005,EXONT:001928,EXONT:001932,EXONT:001988,EXONT:002139,EXONT:002211,EXONT:002678,EXONT:003207,EXONT:003556
EXONT:007137	DNA topoisomerase I, catalytic core, alpha-helical subdomain, eukaryotic-type	IPR_Domain	IPR014711	EXONT:000001,EXONT:000002,EXONT:000005,EXONT:001928,EXONT:001929,EXONT:001930,EXONT:001932,EXONT:002139,EXONT:003176,EXONT:005276
EXONT:007144	RNA polymerase Rpb2, OB-fold	IPR_Domain	IPR014724	EXONT:000001,EXONT:000002,EXONT:001904,EXONT:001905,EXONT:002067,EXONT:002072,EXONT:002408
EXONT:007146	DNA topoisomerase I, catalytic core, alpha/beta subdomain	IPR_Domain	IPR014727	EXONT:000001,EXONT:000002,EXONT:000005,EXONT:001928,EXONT:001929,EXONT:001930,EXONT:001932,EXONT:002139,EXONT:003176,EXONT:005276
EXONT:007157	Nuclear receptor coactivator, CREB-bp-like, interlocking	IPR_Domain	IPR014744	EXONT:000001,EXONT:000002,EXONT:000005,EXONT:000015,EXONT:001904,EXONT:002032,EXONT:002033,EXONT:002034,EXONT:002035,EXONT:002036,EXONT:002058,EXONT:002060,EXONT:002061,EXONT:003539,EXONT:005496
EXONT:007178	Tetrapyrrole methylase, subdomain 2	IPR_Domain	IPR014776	EXONT:000001,EXONT:000002,EXONT:001904,EXONT:002438,EXONT:002439
EXONT:007179	Tetrapyrrole methylase, subdomain 1	IPR_Domain	IPR014777	EXONT:000001,EXONT:000002,EXONT:001904,EXONT:002438,EXONT:002439
EXONT:007181	Peptidase M1, membrane alanine aminopeptidase, N-terminal	IPR_Domain	IPR014782	EXONT:000001,EXONT:000002,EXONT:000005,EXONT:001893,EXONT:001894,EXONT:001897,EXONT:001937,EXONT:001938,EXONT:001939,EXONT:001940,EXONT:001941,EXONT:002024
EXONT:007182	Copper type II, ascorbate-dependent monooxygenase, histidine-cluster-2 conserved site	IPR_Site	IPR014783	EXONT:000001,EXONT:000002,EXONT:001912,EXONT:002167,EXONT:002169,EXONT:002170
EXONT:007183	Copper type II, ascorbate-dependent monooxygenase-like, C-terminal	IPR_Domain	IPR014784	EXONT:000001,EXONT:000002,EXONT:001912,EXONT:002167,EXONT:002169,EXONT:002170
EXONT:007188	Poly(A)-specific ribonuclease, RNA-binding	IPR_Domain	IPR014789	EXONT:000001,EXONT:000002,EXONT:000005,EXONT:001893,EXONT:001928,EXONT:001929,EXONT:001932,EXONT:001937,EXONT:001938,EXONT:001939,EXONT:001948,EXONT:001957,EXONT:001987,EXONT:001988,EXONT:001997,EXONT:002081,EXONT:002562,EXONT:003285,EXONT:003286,EXONT:005533,EXONT:005534,EXONT:005535,EXONT:006334,EXONT:007189,EXONT:007190
EXONT:007189	3'-5'-exoribonuclease activity	GO_molecular_function	GO:0000175	EXONT:000001,EXONT:000002,EXONT:001893,EXONT:001957,EXONT:002081,EXONT:002562,EXONT:003285,EXONT:003286,EXONT:005533,EXONT:005534,EXONT:005535
EXONT:007190	Poly(A)-specific ribonuclease activity	GO_molecular_function	GO:0004535	EXONT:000001,EXONT:000002,EXONT:001893,EXONT:001957,EXONT:002081,EXONT:002562,EXONT:003285,EXONT:003286,EXONT:005533,EXONT:005534,EXONT:005535,EXONT:007189
EXONT:007201	PLC-beta, C-terminal	IPR_Domain	IPR014815	EXONT:000001,EXONT:000002,EXONT:000005,EXONT:001893,EXONT:001937,EXONT:001938,EXONT:001939,EXONT:001957,EXONT:002093,EXONT:002101,EXONT:002802,EXONT:002803,EXONT:002885,EXONT:002886,EXONT:002963
EXONT:007248	VRR-NUC domain	IPR_Domain	IPR014883	EXONT:000001,EXONT:000002,EXONT:001893,EXONT:001957
EXONT:007259	Ku, C-terminal	IPR_Domain	IPR014893	EXONT:000001,EXONT:000002,EXONT:001893,EXONT:001943
EXONT:007267	HIP116, Rad5p N-terminal	IPR_Domain	IPR014905	EXONT:000001,EXONT:000002,EXONT:000005,EXONT:001893,EXONT:001928,EXONT:001929,EXONT:001932,EXONT:001937,EXONT:001938,EXONT:001939,EXONT:001940,EXONT:001941,EXONT:001943,EXONT:001944
EXONT:007281	E2 binding	IPR_Domain	IPR014929	EXONT:000001,EXONT:000002,EXONT:000005,EXONT:001902,EXONT:001928,EXONT:001932,EXONT:001937,EXONT:001984,EXONT:001985,EXONT:001986,EXONT:001987,EXONT:001988,EXONT:001989,EXONT:001990,EXONT:001991,EXONT:001992,EXONT:001993,EXONT:001994,EXONT:001995,EXONT:001996,EXONT:001997,EXONT:001998,EXONT:001999,EXONT:002342,EXONT:002343
EXONT:007282	Myotonic dystrophy protein kinase, coiled coil	IPR_Domain	IPR014930	EXONT:000001,EXONT:000002,EXONT:000005,EXONT:001904,EXONT:001905,EXONT:001906,EXONT:001910,EXONT:001928,EXONT:001932,EXONT:001937,EXONT:001984,EXONT:001985,EXONT:001986,EXONT:001987,EXONT:001988,EXONT:001989,EXONT:001990,EXONT:001991,EXONT:001992,EXONT:001993,EXONT:001994,EXONT:001995,EXONT:001996,EXONT:001997,EXONT:001998,EXONT:001999,EXONT:002248,EXONT:002249
EXONT:007296	Glutamine-Leucine-Glutamine, QLQ	IPR_Domain	IPR014978	EXONT:000001,EXONT:000002,EXONT:000005,EXONT:001893,EXONT:001928,EXONT:001932,EXONT:001937,EXONT:001943,EXONT:001944,EXONT:001984,EXONT:001985,EXONT:001986,EXONT:001987,EXONT:001988,EXONT:001989,EXONT:001990,EXONT:001991,EXONT:001992,EXONT:001993,EXONT:001994,EXONT:001995,EXONT:001996,EXONT:001997,EXONT:001998,EXONT:001999
EXONT:007311	Transforming growth factor beta receptor 2 ectodomain	IPR_Domain	IPR015013	EXONT:000001,EXONT:000002,EXONT:000003,EXONT:000005,EXONT:000012,EXONT:001904,EXONT:001905,EXONT:001906,EXONT:001910,EXONT:001928,EXONT:001932,EXONT:001937,EXONT:001938,EXONT:001939,EXONT:001984,EXONT:001985,EXONT:001986,EXONT:001987,EXONT:001988,EXONT:001989,EXONT:001990,EXONT:001991,EXONT:001992,EXONT:001993,EXONT:001994,EXONT:001995,EXONT:001996,EXONT:001997,EXONT:001998,EXONT:001999,EXONT:002…
EXONT:007312	Transforming growth factor beta receptor activity, type II	GO_molecular_function	GO:0005026	EXONT:000001,EXONT:000002,EXONT:000003,EXONT:000012,EXONT:001904,EXONT:001905,EXONT:001906,EXONT:001910,EXONT:002242,EXONT:002243,EXONT:002244,EXONT:002245,EXONT:002247,EXONT:002248,EXONT:002249
EXONT:007314	F-actin binding	IPR_Domain	IPR015015	EXONT:000001,EXONT:000002,EXONT:000005,EXONT:001904,EXONT:001905,EXONT:001906,EXONT:001910,EXONT:001928,EXONT:001932,EXONT:001937,EXONT:001984,EXONT:001985,EXONT:001986,EXONT:001987,EXONT:001988,EXONT:001989,EXONT:001990,EXONT:001991,EXONT:001992,EXONT:001993,EXONT:001994,EXONT:001995,EXONT:001996,EXONT:001997,EXONT:001998,EXONT:001999,EXONT:002248,EXONT:002808,EXONT:007315
EXONT:007315	Non-membrane spanning protein tyrosine kinase activity	GO_molecular_function	GO:0004715	EXONT:000001,EXONT:000002,EXONT:001904,EXONT:001905,EXONT:001906,EXONT:001910,EXONT:002248,EXONT:002808
EXONT:007318	Microtubule-associated serine/threonine-protein kinase, domain	IPR_Domain	IPR015022	EXONT:000001,EXONT:000002,EXONT:000005,EXONT:001904,EXONT:001905,EXONT:001906,EXONT:001910,EXONT:001928,EXONT:001932,EXONT:001937,EXONT:001938,EXONT:001939,EXONT:001946,EXONT:001984,EXONT:001985,EXONT:001986,EXONT:001987,EXONT:001988,EXONT:001989,EXONT:001990,EXONT:001991,EXONT:001992,EXONT:001993,EXONT:001994,EXONT:001995,EXONT:001996,EXONT:001997,EXONT:001998,EXONT:001999,EXONT:002248,EXONT:002…
EXONT:007328	USP8 interacting	IPR_Domain	IPR015036	EXONT:000001,EXONT:000002,EXONT:001902,EXONT:002342,EXONT:002343
EXONT:007352	Zinc finger, DNA-directed DNA polymerase, family B, alpha	IPR_Domain	IPR015088	EXONT:000001,EXONT:000002,EXONT:000005,EXONT:001904,EXONT:001905,EXONT:001928,EXONT:001932,EXONT:001988,EXONT:001989,EXONT:001992,EXONT:002067,EXONT:002068,EXONT:002069
EXONT:007355	Alkylated DNA repair protein AlkB, homologue 8, N-terminal	IPR_Domain	IPR015095	EXONT:000001,EXONT:000002,EXONT:001904,EXONT:001912,EXONT:002170,EXONT:002438,EXONT:002439,EXONT:004193,EXONT:004194
EXONT:007371	5-aminolevulinate synthase presequence	IPR_Domain	IPR015118	EXONT:000001,EXONT:000002,EXONT:000005,EXONT:001904,EXONT:001928,EXONT:001932,EXONT:001937,EXONT:001984,EXONT:002018,EXONT:002032,EXONT:002033,EXONT:002036,EXONT:002357,EXONT:005876,EXONT:005877,EXONT:005878
EXONT:007374	Bcr-Abl oncoprotein oligomerisation	IPR_Domain	IPR015123	EXONT:000001,EXONT:000002,EXONT:001887,EXONT:001893,EXONT:001904,EXONT:001905,EXONT:001906,EXONT:001910,EXONT:001943,EXONT:001944,EXONT:002046,EXONT:002047,EXONT:002051,EXONT:002052,EXONT:002054,EXONT:002055,EXONT:002056,EXONT:002248,EXONT:002249
EXONT:007377	Gastric H+/K+-transporter P-type ATPase, N-terminal	IPR_Domain	IPR015127	EXONT:000001,EXONT:000002,EXONT:000004,EXONT:000005,EXONT:001893,EXONT:001928,EXONT:001932,EXONT:001937,EXONT:001938,EXONT:001939,EXONT:001943,EXONT:001944,EXONT:001946,EXONT:001984,EXONT:001985,EXONT:001986,EXONT:001987,EXONT:001988,EXONT:001989,EXONT:001990,EXONT:001991,EXONT:001992,EXONT:001993,EXONT:001994,EXONT:001995,EXONT:001996,EXONT:001997,EXONT:001998,EXONT:001999,EXONT:002054,EXONT:002…
EXONT:007378	ATPase activity, coupled to transmembrane movement of ions	GO_molecular_function	GO:0042625	EXONT:000001,EXONT:000002,EXONT:000004,EXONT:001893,EXONT:001943,EXONT:001944,EXONT:002054,EXONT:002055,EXONT:002350,EXONT:002351,EXONT:002363,EXONT:002384,EXONT:002385,EXONT:002386,EXONT:002447,EXONT:002542,EXONT:002648,EXONT:002651,EXONT:002652,EXONT:002653
EXONT:007379	ATPase activity, coupled to transmembrane movement of ions, phosphorylative mechanism	GO_molecular_function	GO:0015662	EXONT:000001,EXONT:000002,EXONT:000004,EXONT:001893,EXONT:001943,EXONT:001944,EXONT:002054,EXONT:002055,EXONT:002350,EXONT:002351,EXONT:002363,EXONT:002384,EXONT:002385,EXONT:002386,EXONT:002447,EXONT:002542,EXONT:002648,EXONT:002651,EXONT:002652,EXONT:002653,EXONT:007378
EXONT:007380	Potassium-transporting ATPase activity	GO_molecular_function	GO:0008556	EXONT:000001,EXONT:000002,EXONT:000004,EXONT:001893,EXONT:001943,EXONT:001944,EXONT:002054,EXONT:002055,EXONT:002350,EXONT:002351,EXONT:002363,EXONT:002384,EXONT:002385,EXONT:002386,EXONT:002392,EXONT:002395,EXONT:002396,EXONT:002447,EXONT:002542,EXONT:002648,EXONT:002651,EXONT:002652,EXONT:002653,EXONT:003214,EXONT:003942,EXONT:007378,EXONT:007379,EXONT:007382
EXONT:007381	Hydrogen:potassium-exchanging ATPase activity	GO_molecular_function	GO:0008900	EXONT:000001,EXONT:000002,EXONT:000004,EXONT:001893,EXONT:001943,EXONT:001944,EXONT:002054,EXONT:002055,EXONT:002350,EXONT:002351,EXONT:002363,EXONT:002384,EXONT:002385,EXONT:002386,EXONT:002392,EXONT:002395,EXONT:002396,EXONT:002447,EXONT:002542,EXONT:002648,EXONT:002651,EXONT:002652,EXONT:002653,EXONT:003214,EXONT:003215,EXONT:003942,EXONT:007378,EXONT:007379,EXONT:007380,EXONT:007382
EXONT:007382	Cation-transporting ATPase activity	GO_molecular_function	GO:0019829	EXONT:000001,EXONT:000002,EXONT:000004,EXONT:001893,EXONT:001943,EXONT:001944,EXONT:002054,EXONT:002055,EXONT:002350,EXONT:002351,EXONT:002363,EXONT:002384,EXONT:002385,EXONT:002386,EXONT:002392,EXONT:002447,EXONT:002542,EXONT:002648,EXONT:002651,EXONT:002652,EXONT:002653,EXONT:007378
EXONT:007438	SLIDE domain	IPR_Domain	IPR015195	EXONT:000001,EXONT:000002,EXONT:000005,EXONT:001893,EXONT:001928,EXONT:001929,EXONT:001930,EXONT:001932,EXONT:001937,EXONT:001943,EXONT:001944,EXONT:001984,EXONT:001985,EXONT:001986,EXONT:001987,EXONT:001988,EXONT:001989,EXONT:001990,EXONT:001991,EXONT:001992,EXONT:001993,EXONT:001994,EXONT:001995,EXONT:001996,EXONT:001997,EXONT:001998,EXONT:001999,EXONT:002426
EXONT:007451	Peptidase M1, leukotriene A4 hydrolase, aminopeptidase C-terminal	IPR_Domain	IPR015211	EXONT:000001,EXONT:000002,EXONT:000005,EXONT:001893,EXONT:001894,EXONT:001897,EXONT:001937,EXONT:001938,EXONT:001939,EXONT:001940,EXONT:001941,EXONT:002024,EXONT:002717
EXONT:007480	Ubiquinol-cytochrome c reductase 8kDa, N-terminal	IPR_Domain	IPR015248	EXONT:000001,EXONT:000002,EXONT:000004,EXONT:000011,EXONT:001912,EXONT:002363,EXONT:002384,EXONT:002385,EXONT:002386,EXONT:002392,EXONT:002395,EXONT:003214,EXONT:003215,EXONT:003957,EXONT:003958,EXONT:003959,EXONT:003986
EXONT:007481	Biliverdin reductase activity	GO_molecular_function	GO:0004074	EXONT:000001,EXONT:000002,EXONT:001912,EXONT:002480,EXONT:002481
EXONT:007482	Biliverdin reductase, catalytic	IPR_Domain	IPR015249	EXONT:000001,EXONT:000002,EXONT:000005,EXONT:001912,EXONT:001937,EXONT:001938,EXONT:001939,EXONT:001940,EXONT:001941,EXONT:002480,EXONT:002481,EXONT:007481
EXONT:007495	Prolyl-tRNA synthetase, class II	IPR_Domain	IPR017449	EXONT:000001,EXONT:000002,EXONT:000005,EXONT:001902,EXONT:001928,EXONT:001932,EXONT:001937,EXONT:001984,EXONT:001985,EXONT:001986,EXONT:001987,EXONT:001988,EXONT:001989,EXONT:001990,EXONT:001991,EXONT:001992,EXONT:001993,EXONT:001994,EXONT:001995,EXONT:001996,EXONT:001997,EXONT:001998,EXONT:001999,EXONT:002418,EXONT:002419,EXONT:002420,EXONT:007496
EXONT:007496	Proline-tRNA ligase activity	GO_molecular_function	GO:0004827	EXONT:000001,EXONT:000002,EXONT:001902,EXONT:002418,EXONT:002419,EXONT:002420
EXONT:007510	RIO2 kinase, winged helix, N-terminal	IPR_Domain	IPR015285	EXONT:000001,EXONT:000002,EXONT:000005,EXONT:001904,EXONT:001905,EXONT:001906,EXONT:001910,EXONT:001928,EXONT:001932,EXONT:001937,EXONT:001984,EXONT:001985,EXONT:001986,EXONT:001987,EXONT:001988,EXONT:001989,EXONT:001990,EXONT:001991,EXONT:001992,EXONT:001993,EXONT:001994,EXONT:001995,EXONT:001996,EXONT:001997,EXONT:001998,EXONT:001999,EXONT:002248,EXONT:002249
EXONT:007522	Activator of Hsp90 ATPase, N-terminal	IPR_Domain	IPR015310	EXONT:000001,EXONT:000002,EXONT:000005,EXONT:001885,EXONT:001887,EXONT:001893,EXONT:001943,EXONT:001944,EXONT:002046,EXONT:002051,EXONT:002054,EXONT:002055,EXONT:002350,EXONT:003471,EXONT:007523,EXONT:007524
EXONT:007523	ATPase activator activity	GO_molecular_function	GO:0001671	EXONT:000001,EXONT:000002,EXONT:001887,EXONT:001893,EXONT:001943,EXONT:001944,EXONT:002046,EXONT:002051,EXONT:002054,EXONT:002055,EXONT:002350,EXONT:007524
EXONT:007524	ATPase regulator activity	GO_molecular_function	GO:0060590	EXONT:000001,EXONT:000002,EXONT:001887,EXONT:001893,EXONT:001943,EXONT:001944,EXONT:002051,EXONT:002054,EXONT:002055,EXONT:002350
EXONT:007525	Apoptosis, DNA fragmentation factor 40kDa	IPR_Domain	IPR015311	EXONT:000001,EXONT:000002,EXONT:001893
EXONT:007545	EXTL2, alpha-1,4-N-acetylhexosaminyltransferase	IPR_Domain	IPR015338	EXONT:000001,EXONT:000002,EXONT:001904,EXONT:002041,EXONT:003574
EXONT:007547	Glycoside hydrolase, family 38, central domain	IPR_Domain	IPR015341	EXONT:000001,EXONT:000002,EXONT:000005,EXONT:001893,EXONT:001920,EXONT:001937,EXONT:001938,EXONT:001939,EXONT:001940,EXONT:001941,EXONT:002111
EXONT:007567	Hepsin, SRCR	IPR_Domain	IPR015352	EXONT:000001,EXONT:000002,EXONT:000011,EXONT:001893,EXONT:001894,EXONT:001897,EXONT:001899,EXONT:001980,EXONT:001981,EXONT:002026,EXONT:002074,EXONT:002672,EXONT:002876
EXONT:007576	Peptidase S53, propeptide	IPR_Domain	IPR015366	EXONT:000001,EXONT:000002,EXONT:000011,EXONT:001893,EXONT:001894,EXONT:001897,EXONT:001980,EXONT:001981,EXONT:003517
EXONT:007583	NADH pyrophosphatase-like, N-terminal	IPR_Domain	IPR015375	EXONT:000001,EXONT:000002,EXONT:001893
EXONT:007584	Zinc ribbon, NADH pyrophosphatase	IPR_Domain	IPR015376	EXONT:000001,EXONT:000002,EXONT:000005,EXONT:001893,EXONT:001937,EXONT:001938,EXONT:001939
EXONT:007585	Hydrolase activity, acting on acid carbon-carbon bonds	GO_molecular_function	GO:0016822	EXONT:000001,EXONT:000002,EXONT:001893
EXONT:007586	Hydrolase activity, acting on acid carbon-carbon bonds, in ketonic substances	GO_molecular_function	GO:0016823	EXONT:000001,EXONT:000002,EXONT:001893,EXONT:007585
EXONT:007587	Fumarylacetoacetase activity	GO_molecular_function	GO:0004334	EXONT:000001,EXONT:000002,EXONT:001893,EXONT:007585,EXONT:007586
EXONT:007588	Fumarylacetoacetase, N-terminal	IPR_Domain	IPR015377	EXONT:000001,EXONT:000002,EXONT:001893,EXONT:007585,EXONT:007586,EXONT:007587
EXONT:007608	NADH-quinone oxidoreductase, chain G, C-terminal	IPR_Domain	IPR015405	EXONT:000001,EXONT:000002,EXONT:000005,EXONT:001912,EXONT:002123,EXONT:002205,EXONT:002206
EXONT:007619	Peptidase S1A, nudel	IPR_Domain	IPR015420	EXONT:000001,EXONT:000002,EXONT:001893,EXONT:001894,EXONT:001897,EXONT:001899,EXONT:001980,EXONT:001981,EXONT:002074,EXONT:002154,EXONT:002711
EXONT:007620	Pyridoxal phosphate-dependent transferase, major region, subdomain 1	IPR_Domain	IPR015421	EXONT:000001,EXONT:000002,EXONT:000005,EXONT:001928,EXONT:001932,EXONT:001937,EXONT:001984,EXONT:002018,EXONT:002357
EXONT:007621	Pyridoxal phosphate-dependent transferase, major region, subdomain 2	IPR_Domain	IPR015422	EXONT:000001,EXONT:000002,EXONT:000005,EXONT:001928,EXONT:001932,EXONT:001937,EXONT:001984,EXONT:002018,EXONT:002357
EXONT:007628	Pyruvate kinase, barrel	IPR_Domain	IPR015793	EXONT:000001,EXONT:000002,EXONT:000005,EXONT:001904,EXONT:001905,EXONT:001906,EXONT:001910,EXONT:001937,EXONT:001938,EXONT:001939,EXONT:001946,EXONT:001977,EXONT:006404,EXONT:006405,EXONT:007629
EXONT:007629	Pyruvate kinase activity	GO_molecular_function	GO:0004743	EXONT:000001,EXONT:000002,EXONT:001904,EXONT:001905,EXONT:001906,EXONT:001910
EXONT:007631	Pyruvate kinase, alpha/beta	IPR_Domain	IPR015794	EXONT:000001,EXONT:000002,EXONT:000005,EXONT:000011,EXONT:001904,EXONT:001905,EXONT:001906,EXONT:001910,EXONT:001937,EXONT:001938,EXONT:001939,EXONT:001946,EXONT:006404,EXONT:006405,EXONT:007629,EXONT:007630
EXONT:007632	Copper amine oxidase, C-terminal	IPR_Domain	IPR015798	EXONT:000001,EXONT:000002,EXONT:000005,EXONT:001912,EXONT:001937,EXONT:001938,EXONT:001939,EXONT:001940,EXONT:002018,EXONT:002171,EXONT:002645,EXONT:003429,EXONT:004532,EXONT:007633
EXONT:007633	Primary amine oxidase activity	GO_molecular_function	GO:0008131	EXONT:000001,EXONT:000002,EXONT:001912,EXONT:003429,EXONT:004532
EXONT:007635	Copper amine oxidase, N2-terminal	IPR_Domain	IPR015800	EXONT:000001,EXONT:000002,EXONT:000005,EXONT:001912,EXONT:001937,EXONT:001938,EXONT:001939,EXONT:001940,EXONT:002018,EXONT:002171,EXONT:002645,EXONT:003429,EXONT:004532,EXONT:007633
EXONT:007637	Copper amine oxidase, N3-terminal	IPR_Domain	IPR015802	EXONT:000001,EXONT:000002,EXONT:000005,EXONT:001912,EXONT:001937,EXONT:001938,EXONT:001939,EXONT:001940,EXONT:002018,EXONT:002171,EXONT:002645,EXONT:003429,EXONT:004532,EXONT:007633
EXONT:007638	Pyruvate kinase, beta-barrel insert domain	IPR_Domain	IPR015806	EXONT:000001,EXONT:000002,EXONT:000011,EXONT:001904,EXONT:001905,EXONT:001906,EXONT:001910,EXONT:005913,EXONT:007629
EXONT:007649	Phosphoglycerate kinase activity	GO_molecular_function	GO:0004618	EXONT:000001,EXONT:000002,EXONT:001904,EXONT:001905,EXONT:001910,EXONT:002762
EXONT:007650	Phosphoglycerate kinase, N-terminal	IPR_Domain	IPR015824	EXONT:000001,EXONT:000002,EXONT:001904,EXONT:001905,EXONT:001910,EXONT:002762,EXONT:007649
EXONT:007652	Polyribonucleotide nucleotidyltransferase, RNA-binding domain	IPR_Domain	IPR015848	EXONT:000001,EXONT:000002,EXONT:000005,EXONT:001893,EXONT:001928,EXONT:001929,EXONT:001932,EXONT:001948,EXONT:001957,EXONT:002081,EXONT:002562,EXONT:003285,EXONT:003286,EXONT:005533,EXONT:005534,EXONT:005535,EXONT:007189
EXONT:007687	Riboflavin kinase activity	GO_molecular_function	GO:0008531	EXONT:000001,EXONT:000002,EXONT:001904,EXONT:001905,EXONT:001906,EXONT:001910
EXONT:007688	Riboflavin kinase domain, bacterial/eukaryotic	IPR_Domain	IPR015865	EXONT:000001,EXONT:000002,EXONT:001904,EXONT:001905,EXONT:001906,EXONT:001910,EXONT:007687,EXONT:007689
EXONT:007689	Riboflavin kinase domain	IPR_Domain	IPR023465	EXONT:000001,EXONT:000002,EXONT:001904,EXONT:001905,EXONT:001906,EXONT:001910,EXONT:007687
EXONT:007695	IMP dehydrogenase / GMP reductase, conserved site	IPR_Site	IPR015875	EXONT:000001,EXONT:000002,EXONT:001912
EXONT:007702	Glycoside hydrolase family 20, catalytic core	IPR_Domain	IPR015883	EXONT:000001,EXONT:000002,EXONT:000011,EXONT:001893,EXONT:001920,EXONT:002111,EXONT:002691,EXONT:002692
EXONT:007703	Malic enzyme, conserved site	IPR_Site	IPR015884	EXONT:000001,EXONT:000002,EXONT:001912,EXONT:002015,EXONT:002266,EXONT:002710,EXONT:006245,EXONT:006247
EXONT:007704	DNA glycosylase/AP lyase, H2TH DNA-binding	IPR_Domain	IPR015886	EXONT:000001,EXONT:000002,EXONT:000005,EXONT:001893,EXONT:001920,EXONT:001921,EXONT:001928,EXONT:001929,EXONT:001930,EXONT:001932,EXONT:001937,EXONT:001938,EXONT:001939,EXONT:001940,EXONT:001941,EXONT:001957,EXONT:002003,EXONT:002078,EXONT:002079,EXONT:002081,EXONT:002082,EXONT:002083,EXONT:002084,EXONT:002635,EXONT:005885
EXONT:007705	DNA glycosylase/AP lyase, zinc finger domain, DNA-binding site	IPR_Site	IPR015887	EXONT:000001,EXONT:000002,EXONT:000005,EXONT:001893,EXONT:001920,EXONT:001921,EXONT:001928,EXONT:001929,EXONT:001930,EXONT:001932,EXONT:001937,EXONT:001938,EXONT:001939,EXONT:001940,EXONT:001941,EXONT:001957,EXONT:002003,EXONT:002078,EXONT:002079,EXONT:002081,EXONT:002082,EXONT:002083,EXONT:002084
EXONT:007709	Carbonate dehydratase activity	GO_molecular_function	GO:0004089	EXONT:000001,EXONT:000002,EXONT:002003,EXONT:002078,EXONT:002616
EXONT:007711	Guanylate-binding protein, N-terminal	IPR_Domain	IPR015894	EXONT:000001,EXONT:000002,EXONT:000005,EXONT:001893,EXONT:001928,EXONT:001932,EXONT:001937,EXONT:001943,EXONT:001944,EXONT:001984,EXONT:001985,EXONT:001987,EXONT:001988,EXONT:001989,EXONT:001990,EXONT:001991,EXONT:001992,EXONT:001993,EXONT:001994,EXONT:001995,EXONT:001997,EXONT:001998,EXONT:002054,EXONT:002055,EXONT:002056,EXONT:002090,EXONT:002091,EXONT:002200
EXONT:007719	Phosphoglycerate kinase, C-terminal	IPR_Domain	IPR015901	EXONT:000001,EXONT:000002,EXONT:001904,EXONT:001905,EXONT:001910,EXONT:002762,EXONT:007649
EXONT:007720	Allantoicase domain	IPR_Domain	IPR015908	EXONT:000001,EXONT:000002,EXONT:000011,EXONT:001893,EXONT:002000,EXONT:002222,EXONT:006704,EXONT:007721
EXONT:007721	Allantoicase activity	GO_molecular_function	GO:0004037	EXONT:000001,EXONT:000002,EXONT:001893,EXONT:002000,EXONT:006704
EXONT:007723	Phosphoglycerate kinase, conserved site	IPR_Site	IPR015911	EXONT:000001,EXONT:000002,EXONT:001904,EXONT:001905,EXONT:001910,EXONT:002762,EXONT:007649
EXONT:007724	Phosphofructokinase, conserved site	IPR_Site	IPR015912	EXONT:000001,EXONT:000002,EXONT:001904,EXONT:001905,EXONT:001906,EXONT:001907,EXONT:001908,EXONT:001910,EXONT:001911
EXONT:007725	Purple acid phosphatase, N-terminal	IPR_Domain	IPR015914	EXONT:000001,EXONT:000002,EXONT:000005,EXONT:001893,EXONT:001937,EXONT:001938,EXONT:001939,EXONT:001957,EXONT:002093,EXONT:002094,EXONT:005412,EXONT:005413
EXONT:007727	Peptidase C14A, caspase precursor p45, core	IPR_Domain	IPR015917	EXONT:000001,EXONT:000002,EXONT:001893,EXONT:001894,EXONT:001897,EXONT:001898,EXONT:001899,EXONT:002064,EXONT:006097
EXONT:007736	Glycine N-acyltransferase activity	GO_molecular_function	GO:0047961	EXONT:000001,EXONT:000002,EXONT:001904,EXONT:002032,EXONT:002033,EXONT:002036
EXONT:007737	Glycine N-acyltransferase, N-terminal	IPR_Domain	IPR015938	EXONT:000001,EXONT:000002,EXONT:001904,EXONT:002032,EXONT:002033,EXONT:002036,EXONT:007736
EXONT:007738	Fumarate reductase/succinate dehydrogenase flavoprotein-like, C-terminal	IPR_Domain	IPR015939	EXONT:000001,EXONT:000002,EXONT:001912
EXONT:007752	Lactate dehydrogenase/glycoside hydrolase, family 4, C-terminal	IPR_Domain	IPR015955	EXONT:000001,EXONT:000002,EXONT:001912,EXONT:002015,EXONT:002266
EXONT:007786	Phosphatidylinositol-4-phosphate 5-kinase, core, subgroup	IPR_Domain	IPR016034	EXONT:000001,EXONT:000002,EXONT:001904,EXONT:001905,EXONT:001906,EXONT:001910,EXONT:003242,EXONT:003243
EXONT:007787	Malonyl-CoA ACP transacylase, ACP-binding	IPR_Domain	IPR016036	EXONT:000001,EXONT:000002
EXONT:007788	Thiolase-like, subgroup	IPR_Domain	IPR016038	EXONT:000001,EXONT:000002,EXONT:007789
EXONT:007789	Thiolase-like	IPR_Domain	IPR016039	EXONT:000001,EXONT:000002
EXONT:007793	Proteasome beta-type subunit, conserved site	IPR_Site	IPR016050	EXONT:000001,EXONT:000002,EXONT:001893,EXONT:001894,EXONT:001897,EXONT:001899
EXONT:007794	Alpha-D-phosphohexomutase, alpha/beta/alpha I/II/III	IPR_Domain	IPR016055	EXONT:000001,EXONT:000002,EXONT:002139,EXONT:003207,EXONT:004394
EXONT:007798	DNA ligase, ATP-dependent, conserved site	IPR_Site	IPR016059	EXONT:000001,EXONT:000002,EXONT:001902,EXONT:003912,EXONT:003913
EXONT:007799	Proline-tRNA ligase, class II, C-terminal	IPR_Domain	IPR016061	EXONT:000001,EXONT:000002,EXONT:000005,EXONT:001902,EXONT:001928,EXONT:001932,EXONT:001937,EXONT:001984,EXONT:001985,EXONT:001986,EXONT:001987,EXONT:001988,EXONT:001989,EXONT:001990,EXONT:001991,EXONT:001992,EXONT:001993,EXONT:001994,EXONT:001995,EXONT:001996,EXONT:001997,EXONT:001998,EXONT:001999,EXONT:002418,EXONT:002419,EXONT:002420,EXONT:007495,EXONT:007496
EXONT:007800	NAD+ kinase activity	GO_molecular_function	GO:0003951	EXONT:000001,EXONT:000002,EXONT:001904,EXONT:001905,EXONT:001906,EXONT:001910
EXONT:007801	ATP-NAD kinase-like domain	IPR_Domain	IPR016064	EXONT:000001,EXONT:000002,EXONT:001904,EXONT:001905,EXONT:001906,EXONT:001910,EXONT:007800
EXONT:007803	Adenosylmethionine decarboxylase activity	GO_molecular_function	GO:0004014	EXONT:000001,EXONT:000002,EXONT:002003,EXONT:002004,EXONT:002117
EXONT:007804	S-adenosylmethionine decarboxylase, core	IPR_Domain	IPR016067	EXONT:000001,EXONT:000002,EXONT:002003,EXONT:002004,EXONT:002117,EXONT:007803
EXONT:007808	Staphylococcal nuclease (SNase-like), OB-fold	IPR_Domain	IPR016071	EXONT:000001,EXONT:000002,EXONT:000005,EXONT:001893,EXONT:001928,EXONT:001929,EXONT:001932,EXONT:001957
EXONT:007845	Peptidase C14, ICE, catalytic subunit p20, active site	IPR_Site	IPR016129	EXONT:000001,EXONT:000002,EXONT:000018,EXONT:001893,EXONT:001894,EXONT:001897,EXONT:001898,EXONT:001899,EXONT:002064
EXONT:007846	Protein-tyrosine phosphatase, active site	IPR_Site	IPR016130	EXONT:000001,EXONT:000002,EXONT:000018,EXONT:001893,EXONT:001957,EXONT:002093,EXONT:002094,EXONT:002095,EXONT:002107
EXONT:007855	Citrate synthase-like, core	IPR_Domain	IPR016141	EXONT:000001,EXONT:000002,EXONT:001904,EXONT:002032,EXONT:002317
EXONT:007856	Citrate synthase-like, large alpha subdomain	IPR_Domain	IPR016142	EXONT:000001,EXONT:000002,EXONT:001904,EXONT:002032,EXONT:002317
EXONT:007857	Citrate synthase-like, small alpha subdomain	IPR_Domain	IPR016143	EXONT:000001,EXONT:000002,EXONT:001904,EXONT:002032,EXONT:002317
EXONT:007860	Kinase regulator activity	GO_molecular_function	GO:0019207	EXONT:000001,EXONT:000002,EXONT:001887,EXONT:001904,EXONT:001905,EXONT:001910
EXONT:007861	Protein kinase regulator activity	GO_molecular_function	GO:0019887	EXONT:000001,EXONT:000002,EXONT:001887,EXONT:001904,EXONT:001905,EXONT:001906,EXONT:001910,EXONT:002248,EXONT:007860
EXONT:007862	Casein kinase II, regulatory subunit, alpha-helical	IPR_Domain	IPR016149	EXONT:000001,EXONT:000002,EXONT:001887,EXONT:001904,EXONT:001905,EXONT:001906,EXONT:001910,EXONT:002248,EXONT:007860,EXONT:007861
EXONT:007863	Casein kinase II, regulatory subunit, beta-sheet	IPR_Domain	IPR016150	EXONT:000001,EXONT:000002,EXONT:001887,EXONT:001904,EXONT:001905,EXONT:001906,EXONT:001910,EXONT:002248,EXONT:007860,EXONT:007861
EXONT:007871	Aldehyde dehydrogenase, conserved site	IPR_Site	IPR016160	EXONT:000001,EXONT:000002,EXONT:001912
EXONT:007872	Aldehyde dehydrogenase, N-terminal	IPR_Domain	IPR016162	EXONT:000001,EXONT:000002,EXONT:001912
EXONT:007873	Aldehyde dehydrogenase, C-terminal	IPR_Domain	IPR016163	EXONT:000001,EXONT:000002,EXONT:001912,EXONT:002162,EXONT:002163
EXONT:007874	FAD-binding, type 2, subdomain 1	IPR_Domain	IPR016167	EXONT:000001,EXONT:000002,EXONT:000005,EXONT:001912,EXONT:001928,EXONT:001932,EXONT:001937,EXONT:001984,EXONT:001987,EXONT:001988,EXONT:001997,EXONT:002015,EXONT:002017,EXONT:002018,EXONT:002019,EXONT:002266,EXONT:004470
EXONT:007882	Copper amine oxidase, N-terminal	IPR_Domain	IPR016182	EXONT:000001,EXONT:000002,EXONT:000005,EXONT:001912,EXONT:001937,EXONT:001938,EXONT:001939,EXONT:001940,EXONT:002018,EXONT:002171,EXONT:002645,EXONT:003429,EXONT:004532,EXONT:007633
EXONT:007886	APOBEC/CMP deaminase, zinc-binding	IPR_Site	IPR016192	EXONT:000001,EXONT:000002,EXONT:000005,EXONT:001893,EXONT:001937,EXONT:001938,EXONT:001939,EXONT:001940,EXONT:001941
EXONT:007887	Cytidine deaminase-like	IPR_Domain	IPR016193	EXONT:000001,EXONT:000002
EXONT:007891	ATP-NAD kinase, PpnK-type, all-beta	IPR_Domain	IPR017437	EXONT:000001,EXONT:000002,EXONT:001904,EXONT:001905,EXONT:001906,EXONT:001910,EXONT:007800
EXONT:007892	Inorganic polyphosphate/ATP-NAD kinase, domain 1	IPR_Domain	IPR017438	EXONT:000001,EXONT:000002,EXONT:001904,EXONT:001905,EXONT:001906,EXONT:001910,EXONT:007800
EXONT:007893	ATP-citrate lyase/succinyl-CoA ligase, active site	IPR_Site	IPR017440	EXONT:000001,EXONT:000002,EXONT:000018,EXONT:001902,EXONT:001904,EXONT:002032,EXONT:002317,EXONT:005044,EXONT:005045,EXONT:007894,EXONT:007895,EXONT:007896,EXONT:007897
EXONT:007894	ATP citrate synthase activity	GO_molecular_function	GO:0003878	EXONT:000001,EXONT:000002,EXONT:001904,EXONT:002032,EXONT:002317
EXONT:007895	CoA-ligase activity	GO_molecular_function	GO:0016405	EXONT:000001,EXONT:000002,EXONT:001902,EXONT:005044
EXONT:007896	Succinate-CoA ligase activity	GO_molecular_function	GO:0004774	EXONT:000001,EXONT:000002,EXONT:001902,EXONT:005044,EXONT:005045,EXONT:007895
EXONT:007897	Succinate-CoA ligase (ADP-forming) activity	GO_molecular_function	GO:0004775	EXONT:000001,EXONT:000002,EXONT:001902,EXONT:005044,EXONT:005045,EXONT:007895,EXONT:007896
EXONT:007905	CTP synthase activity	GO_molecular_function	GO:0003883	EXONT:000001,EXONT:000002,EXONT:001902,EXONT:002342
EXONT:007906	CTP synthase, N-terminal	IPR_Domain	IPR017456	EXONT:000001,EXONT:000002,EXONT:001902,EXONT:002342,EXONT:007905
EXONT:007951	Alkaline phosphatase-like, alpha/beta/alpha	IPR_Domain	IPR017849	EXONT:000001,EXONT:000002
EXONT:007952	GPI ethanolamine phosphate transferase 1, C-terminal	IPR_Domain	IPR017852	EXONT:000001,EXONT:000002,EXONT:001904
EXONT:007961	ABC transporter, conserved site	IPR_Site	IPR017871	EXONT:000001,EXONT:000002,EXONT:000005,EXONT:001893,EXONT:001928,EXONT:001932,EXONT:001937,EXONT:001943,EXONT:001944,EXONT:001984,EXONT:001985,EXONT:001986,EXONT:001987,EXONT:001988,EXONT:001989,EXONT:001990,EXONT:001991,EXONT:001992,EXONT:001993,EXONT:001994,EXONT:001995,EXONT:001996,EXONT:001997,EXONT:001998,EXONT:001999,EXONT:002054,EXONT:002055,EXONT:002350
EXONT:007969	Nitrite reductase [NAD(P)H] large subunit, NirD bacterial-type	IPR_Domain	IPR017881	EXONT:000001,EXONT:000002,EXONT:001912,EXONT:006351,EXONT:006352,EXONT:006353,EXONT:006354
EXONT:007976	Protein kinase, C-terminal	IPR_Domain	IPR017892	EXONT:000001,EXONT:000002,EXONT:000005,EXONT:001904,EXONT:001905,EXONT:001906,EXONT:001910,EXONT:001928,EXONT:001932,EXONT:001937,EXONT:001984,EXONT:001985,EXONT:001986,EXONT:001987,EXONT:001988,EXONT:001989,EXONT:001990,EXONT:001991,EXONT:001992,EXONT:001993,EXONT:001994,EXONT:001995,EXONT:001996,EXONT:001997,EXONT:001998,EXONT:001999,EXONT:002248,EXONT:002249,EXONT:002547
EXONT:007989	Thiol oxidase activity	GO_molecular_function	GO:0016972	EXONT:000001,EXONT:000002,EXONT:001912,EXONT:003020,EXONT:005816
EXONT:007990	ERV/ALR sulfhydryl oxidase domain	IPR_Domain	IPR017905	EXONT:000001,EXONT:000002,EXONT:001912,EXONT:003020,EXONT:005816,EXONT:007989
EXONT:007997	Colipase, N-terminal	IPR_Domain	IPR017913	EXONT:000001,EXONT:000002,EXONT:001887,EXONT:002046
EXONT:007998	Colipase, C-terminal	IPR_Domain	IPR017914	EXONT:000001,EXONT:000002,EXONT:001887,EXONT:002046
EXONT:007999	Colipase, conserved site	IPR_Site	IPR017915	EXONT:000001,EXONT:000002,EXONT:001887,EXONT:002046
EXONT:008007	Dihydrofolate reductase conserved site	IPR_Site	IPR017925	EXONT:000001,EXONT:000002,EXONT:001912,EXONT:003000,EXONT:003001,EXONT:003002
EXONT:008013	PLC-like phosphodiesterase, TIM beta/alpha-barrel domain	IPR_Domain	IPR017946	EXONT:000001,EXONT:000002,EXONT:001893,EXONT:001957,EXONT:002093,EXONT:002886
EXONT:008014	Aryldialkylphosphatase, zinc-binding site	IPR_Site	IPR017947	EXONT:000001,EXONT:000002,EXONT:000005,EXONT:001893,EXONT:001937,EXONT:001938,EXONT:001939,EXONT:001940,EXONT:001941,EXONT:001957
EXONT:008024	Glutamyl-tRNA(Gln) amidotransferase, subunit B, conserved site	IPR_Site	IPR017958	EXONT:000001,EXONT:000002,EXONT:001902,EXONT:002342,EXONT:002950
EXONT:008026	DNA-repair protein, UmuC-like, N-terminal	IPR_Domain	IPR017963	EXONT:000001,EXONT:000002,EXONT:000005,EXONT:001904,EXONT:001905,EXONT:001928,EXONT:001929,EXONT:001930,EXONT:001932,EXONT:002067,EXONT:002068,EXONT:002069,EXONT:002635
EXONT:008027	DNA-directed DNA polymerase, family B, conserved site	IPR_Site	IPR017964	EXONT:000001,EXONT:000002,EXONT:000005,EXONT:001904,EXONT:001905,EXONT:001928,EXONT:001929,EXONT:001932,EXONT:001987,EXONT:001988,EXONT:001997,EXONT:002067,EXONT:002068,EXONT:002069
EXONT:008032	Cytochrome P450, conserved site	IPR_Site	IPR017972	EXONT:000001,EXONT:000002,EXONT:001912,EXONT:002170
EXONT:008048	Nucleoside phosphorylase, conserved site	IPR_Site	IPR018016	EXONT:000001,EXONT:000002,EXONT:001904,EXONT:002041,EXONT:003315
EXONT:008050	Asn/Gln amidotransferase	IPR_Domain	IPR018027	EXONT:000001,EXONT:000002,EXONT:001902,EXONT:002342,EXONT:002950,EXONT:003757
EXONT:008066	Mannose-6-phosphate isomerase activity	GO_molecular_function	GO:0004476	EXONT:000001,EXONT:000002,EXONT:002139,EXONT:002700,EXONT:002701
EXONT:008067	Phosphomannose isomerase, type I, conserved site	IPR_Site	IPR018050	EXONT:000001,EXONT:000002,EXONT:002139,EXONT:002700,EXONT:002701,EXONT:008066
EXONT:008073	Deoxyribonuclease I, active site	IPR_Site	IPR018057	EXONT:000001,EXONT:000002,EXONT:000018,EXONT:001893,EXONT:001957,EXONT:002081,EXONT:002082,EXONT:002083,EXONT:002084,EXONT:002567,EXONT:003611
EXONT:008086	Ubiquitin-activating enzyme, E1, active site	IPR_Site	IPR018074	EXONT:000001,EXONT:000002,EXONT:000011,EXONT:000018
EXONT:008091	Sterol reductase, conserved site	IPR_Site	IPR018083	EXONT:000001,EXONT:000002,EXONT:001912,EXONT:002480,EXONT:002481
EXONT:008093	Uracil-DNA glycosylase, active site	IPR_Site	IPR018085	EXONT:000001,EXONT:000002,EXONT:000018,EXONT:001893,EXONT:001920,EXONT:001921
EXONT:008097	Orotidine 5'-phosphate decarboxylase, active site	IPR_Site	IPR018089	EXONT:000001,EXONT:000002,EXONT:000018,EXONT:002003,EXONT:002004,EXONT:002117,EXONT:002981
EXONT:008098	Phosphoenolpyruvate carboxykinase (GTP) activity	GO_molecular_function	GO:0004613	EXONT:000001,EXONT:000002,EXONT:002003,EXONT:002004,EXONT:002117,EXONT:005241
EXONT:008099	Phosphoenolpyruvate carboxykinase, GTP-utilising, conserved site	IPR_Site	IPR018091	EXONT:000001,EXONT:000002,EXONT:002003,EXONT:002004,EXONT:002117,EXONT:005241,EXONT:008098
EXONT:008101	Thymidylate kinase activity	GO_molecular_function	GO:0004798	EXONT:000001,EXONT:000002,EXONT:001904,EXONT:001905,EXONT:001910,EXONT:004037,EXONT:005167,EXONT:005168
EXONT:008102	Thymidylate kinase, conserved site	IPR_Site	IPR018095	EXONT:000001,EXONT:000002,EXONT:000005,EXONT:001904,EXONT:001905,EXONT:001910,EXONT:001928,EXONT:001932,EXONT:001937,EXONT:001984,EXONT:001985,EXONT:001986,EXONT:001987,EXONT:001988,EXONT:001989,EXONT:001990,EXONT:001991,EXONT:001992,EXONT:001993,EXONT:001994,EXONT:001995,EXONT:001996,EXONT:001997,EXONT:001998,EXONT:001999,EXONT:004037,EXONT:005167,EXONT:005168,EXONT:008101
EXONT:008106	Purine phosphorylase, family 2, conserved site	IPR_Site	IPR018099	EXONT:000001,EXONT:000002,EXONT:001904,EXONT:002041,EXONT:003315
EXONT:008114	Tetrahydrofolylpolyglutamate synthase activity	GO_molecular_function	GO:0004326	EXONT:000001,EXONT:000002,EXONT:001902,EXONT:002342,EXONT:002343
EXONT:008115	Folylpolyglutamate synthetase, conserved site	IPR_Site	IPR018109	EXONT:000001,EXONT:000002,EXONT:000005,EXONT:001902,EXONT:001928,EXONT:001932,EXONT:001937,EXONT:001984,EXONT:001985,EXONT:001986,EXONT:001987,EXONT:001988,EXONT:001989,EXONT:001990,EXONT:001991,EXONT:001992,EXONT:001993,EXONT:001994,EXONT:001995,EXONT:001996,EXONT:001997,EXONT:001998,EXONT:001999,EXONT:002342,EXONT:002343,EXONT:008114
EXONT:008118	Peptidase S1, trypsin family, active site	IPR_Site	IPR018114	EXONT:000001,EXONT:000002,EXONT:000018,EXONT:001893,EXONT:001894,EXONT:001897,EXONT:001899,EXONT:001980,EXONT:001981,EXONT:002074
EXONT:008120	DNA methylase, C-5 cytosine-specific, active site	IPR_Site	IPR018117	EXONT:000001,EXONT:000002,EXONT:000005,EXONT:000018,EXONT:001928,EXONT:001929,EXONT:001930,EXONT:001932
EXONT:008121	Amine-lyase activity	GO_molecular_function	GO:0016843	EXONT:000001,EXONT:000002,EXONT:002003,EXONT:004199
EXONT:008122	Strictosidine synthase activity	GO_molecular_function	GO:0016844	EXONT:000001,EXONT:000002,EXONT:002003,EXONT:004199,EXONT:008121
EXONT:008123	Strictosidine synthase, conserved region	IPR_Domain	IPR018119	EXONT:000001,EXONT:000002,EXONT:002003,EXONT:004199,EXONT:008121,EXONT:008122
EXONT:008124	Glycoside hydrolase, family 1, active site	IPR_Site	IPR018120	EXONT:000001,EXONT:000002,EXONT:000018,EXONT:001893,EXONT:001920,EXONT:002111
EXONT:008139	Lactoylglutathione lyase activity	GO_molecular_function	GO:0004462	EXONT:000001,EXONT:000002,EXONT:002003,EXONT:004811
EXONT:008140	Glyoxalase I, conserved site	IPR_Site	IPR018146	EXONT:000001,EXONT:000002,EXONT:000005,EXONT:001937,EXONT:001938,EXONT:001939,EXONT:002003,EXONT:004811,EXONT:008139
EXONT:008143	Lysyl-tRNA synthetase, class II, C-terminal	IPR_Domain	IPR018149	EXONT:000001,EXONT:000002,EXONT:000005,EXONT:001902,EXONT:001928,EXONT:001932,EXONT:001937,EXONT:001984,EXONT:001985,EXONT:001986,EXONT:001987,EXONT:001988,EXONT:001989,EXONT:001990,EXONT:001991,EXONT:001992,EXONT:001993,EXONT:001994,EXONT:001995,EXONT:001996,EXONT:001997,EXONT:001998,EXONT:001999,EXONT:002418,EXONT:002419,EXONT:002420,EXONT:004028,EXONT:004029,EXONT:008144
EXONT:008144	Lysine-tRNA ligase activity	GO_molecular_function	GO:0004824	EXONT:000001,EXONT:000002,EXONT:001902,EXONT:002418,EXONT:002419,EXONT:002420
EXONT:008146	Superoxide dismutase, copper/zinc, binding site	IPR_Site	IPR018152	EXONT:000001,EXONT:000002,EXONT:000005,EXONT:001912,EXONT:008147,EXONT:008148
EXONT:008147	Oxidoreductase activity, acting on superoxide radicals as acceptor	GO_molecular_function	GO:0016721	EXONT:000001,EXONT:000002,EXONT:001912
EXONT:008148	Superoxide dismutase activity	GO_molecular_function	GO:0004784	EXONT:000001,EXONT:000002,EXONT:001912,EXONT:008147
EXONT:008151	Alanine-tRNA ligase, class IIc, anti-codon-binding domain	IPR_Domain	IPR018162	EXONT:000001,EXONT:000002,EXONT:000005,EXONT:001902,EXONT:001928,EXONT:001932,EXONT:001937,EXONT:001984,EXONT:001985,EXONT:001986,EXONT:001987,EXONT:001988,EXONT:001989,EXONT:001990,EXONT:001991,EXONT:001992,EXONT:001993,EXONT:001994,EXONT:001995,EXONT:001996,EXONT:001997,EXONT:001998,EXONT:001999,EXONT:002418,EXONT:002419,EXONT:002420,EXONT:008152
EXONT:008152	Alanine-tRNA ligase activity	GO_molecular_function	GO:0004813	EXONT:000001,EXONT:000002,EXONT:001902,EXONT:002418,EXONT:002419,EXONT:002420
EXONT:008154	Alanyl-tRNA synthetase, class IIc, N-terminal	IPR_Domain	IPR018164	EXONT:000001,EXONT:000002,EXONT:000005,EXONT:001902,EXONT:001928,EXONT:001932,EXONT:001937,EXONT:001984,EXONT:001985,EXONT:001986,EXONT:001987,EXONT:001988,EXONT:001989,EXONT:001990,EXONT:001991,EXONT:001992,EXONT:001993,EXONT:001994,EXONT:001995,EXONT:001996,EXONT:001997,EXONT:001998,EXONT:001999,EXONT:002418,EXONT:002419,EXONT:002420,EXONT:008152
EXONT:008155	Alanyl-tRNA synthetase, class IIc, core domain	IPR_Domain	IPR018165	EXONT:000001,EXONT:000002,EXONT:000005,EXONT:001902,EXONT:001928,EXONT:001929,EXONT:001932,EXONT:001937,EXONT:001984,EXONT:001985,EXONT:001986,EXONT:001987,EXONT:001988,EXONT:001989,EXONT:001990,EXONT:001991,EXONT:001992,EXONT:001993,EXONT:001994,EXONT:001995,EXONT:001996,EXONT:001997,EXONT:001998,EXONT:001999,EXONT:002418,EXONT:002419,EXONT:002420,EXONT:008152
EXONT:008156	S-adenosylmethionine decarboxylase, conserved site	IPR_Site	IPR018166	EXONT:000001,EXONT:000002,EXONT:002003,EXONT:002004,EXONT:002117,EXONT:007803
EXONT:008157	Ubiquinone biosynthesis hydroxylase, UbiH/UbiF/VisC/COQ6, conserved site	IPR_Site	IPR018168	EXONT:000001,EXONT:000002,EXONT:001912,EXONT:002167,EXONT:002170,EXONT:003840
EXONT:008158	Aldo/keto reductase, conserved site	IPR_Site	IPR018170	EXONT:000001,EXONT:000002,EXONT:001912
EXONT:008159	Aminoacyl-tRNA hydrolase activity	GO_molecular_function	GO:0004045	EXONT:000001,EXONT:000002,EXONT:001893,EXONT:001957,EXONT:001958
EXONT:008160	Peptidyl-tRNA hydrolase, conserved site	IPR_Site	IPR018171	EXONT:000001,EXONT:000002,EXONT:001893,EXONT:001957,EXONT:001958,EXONT:008159
EXONT:008162	L-lactate dehydrogenase, active site	IPR_Site	IPR018177	EXONT:000001,EXONT:000002,EXONT:000018,EXONT:001912,EXONT:002015,EXONT:002266,EXONT:008163,EXONT:008164
EXONT:008163	Lactate dehydrogenase activity	GO_molecular_function	GO:0004457	EXONT:000001,EXONT:000002,EXONT:001912,EXONT:002015
EXONT:008164	L-lactate dehydrogenase activity	GO_molecular_function	GO:0004459	EXONT:000001,EXONT:000002,EXONT:001912,EXONT:002015,EXONT:002266,EXONT:008163
EXONT:008170	Ribonuclease T2, active site	IPR_Site	IPR018188	EXONT:000001,EXONT:000002,EXONT:000005,EXONT:000018,EXONT:001893,EXONT:001928,EXONT:001929,EXONT:001932,EXONT:001948,EXONT:001957,EXONT:002081,EXONT:002082,EXONT:002562,EXONT:002565,EXONT:004717,EXONT:004718,EXONT:008171
EXONT:008171	Ribonuclease T2 activity	GO_molecular_function	GO:0033897	EXONT:000001,EXONT:000002,EXONT:001893,EXONT:001957,EXONT:002081,EXONT:002082,EXONT:002562,EXONT:002565,EXONT:004717,EXONT:004718
EXONT:008172	Phosphoglucose isomerase, conserved site	IPR_Site	IPR018189	EXONT:000001,EXONT:000002,EXONT:002139,EXONT:002700,EXONT:002701,EXONT:005737
EXONT:008181	Peptidase C19, ubiquitin carboxyl-terminal hydrolase, conserved site	IPR_Site	IPR018200	EXONT:000001,EXONT:000002,EXONT:001893,EXONT:002795
EXONT:008182	Beta-ketoacyl synthase, active site	IPR_Site	IPR018201	EXONT:000001,EXONT:000002,EXONT:000011,EXONT:000018
EXONT:008183	Peptidase S10, serine carboxypeptidase, active site	IPR_Site	IPR018202	EXONT:000001,EXONT:000002,EXONT:000018,EXONT:001893,EXONT:001894,EXONT:001897,EXONT:001980,EXONT:001981,EXONT:002026,EXONT:002467,EXONT:002876,EXONT:003065
EXONT:008187	Heme oxygenase (decyclizing) activity	GO_molecular_function	GO:0004392	EXONT:000001,EXONT:000002,EXONT:001912,EXONT:002170
EXONT:008188	Haem oxygenase conserved site	IPR_Site	IPR018207	EXONT:000001,EXONT:000002,EXONT:001912,EXONT:002170,EXONT:008187
EXONT:008190	Pyruvate kinase, active site	IPR_Site	IPR018209	EXONT:000001,EXONT:000002,EXONT:000018,EXONT:001904,EXONT:001905,EXONT:001906,EXONT:001910,EXONT:007629
EXONT:008194	ClpP, active site	IPR_Site	IPR018215	EXONT:000001,EXONT:000002,EXONT:000018,EXONT:001893,EXONT:001894,EXONT:001897,EXONT:001899,EXONT:001980,EXONT:001981,EXONT:002074
EXONT:008197	Adenylosuccinate synthase, active site	IPR_Site	IPR018220	EXONT:000001,EXONT:000002,EXONT:000005,EXONT:000018,EXONT:001902,EXONT:001928,EXONT:001932,EXONT:001937,EXONT:001984,EXONT:001985,EXONT:001987,EXONT:001988,EXONT:001989,EXONT:001990,EXONT:001991,EXONT:001992,EXONT:001993,EXONT:001994,EXONT:001995,EXONT:001997,EXONT:001998,EXONT:002090,EXONT:002091,EXONT:002200,EXONT:002342,EXONT:008198
EXONT:008198	Adenylosuccinate synthase activity	GO_molecular_function	GO:0004019	EXONT:000001,EXONT:000002,EXONT:001902,EXONT:002342
EXONT:008201	Argininosuccinate synthase activity	GO_molecular_function	GO:0004055	EXONT:000001,EXONT:000002,EXONT:001902,EXONT:002342
EXONT:008202	Argininosuccinate synthase, conserved site	IPR_Site	IPR018223	EXONT:000001,EXONT:000002,EXONT:000005,EXONT:001902,EXONT:001928,EXONT:001932,EXONT:001937,EXONT:001984,EXONT:001985,EXONT:001986,EXONT:001987,EXONT:001988,EXONT:001989,EXONT:001990,EXONT:001991,EXONT:001992,EXONT:001993,EXONT:001994,EXONT:001995,EXONT:001996,EXONT:001997,EXONT:001998,EXONT:001999,EXONT:002342,EXONT:008201
EXONT:008204	Transaldolase, active site	IPR_Site	IPR018225	EXONT:000001,EXONT:000002,EXONT:000011,EXONT:000018
EXONT:008206	Deoxyribonuclease, TatD-related, conserved site	IPR_Site	IPR018228	EXONT:000001,EXONT:000002,EXONT:001893,EXONT:001957,EXONT:002081,EXONT:002082,EXONT:002083,EXONT:002084,EXONT:002567,EXONT:003611
EXONT:008209	Glycoside hydrolase, family 37, conserved site	IPR_Site	IPR018232	EXONT:000001,EXONT:000002,EXONT:001893,EXONT:001920,EXONT:002111,EXONT:005967,EXONT:005968
EXONT:008211	GTP cyclohydrolase activity	GO_molecular_function	GO:0003933	EXONT:000001,EXONT:000002,EXONT:001893,EXONT:002000,EXONT:002339,EXONT:003239
EXONT:008212	GTP cyclohydrolase I activity	GO_molecular_function	GO:0003934	EXONT:000001,EXONT:000002,EXONT:001893,EXONT:002000,EXONT:002339,EXONT:003239,EXONT:008211
EXONT:008213	GTP cyclohydrolase I, conserved site	IPR_Site	IPR018234	EXONT:000001,EXONT:000002,EXONT:001893,EXONT:002000,EXONT:002339,EXONT:003239,EXONT:008211,EXONT:008212
EXONT:008217	Phosphoribosylaminoimidazolesuccinocarboxamide synthase activity	GO_molecular_function	GO:0004639	EXONT:000001,EXONT:000002,EXONT:001902,EXONT:002342,EXONT:002343
EXONT:008218	SAICAR synthetase, conserved site	IPR_Site	IPR018236	EXONT:000001,EXONT:000002,EXONT:001902,EXONT:002342,EXONT:002343,EXONT:008217
EXONT:008273	4-diphosphocytidyl-2C-methyl-D-erythritol synthase, conserved site	IPR_Site	IPR018294	EXONT:000001,EXONT:000002
EXONT:008274	FLAP/GST2/LTC4S, conserved site	IPR_Site	IPR018295	EXONT:000001,EXONT:000002,EXONT:001887,EXONT:002046
EXONT:008276	Adenylyl cyclase class-3/4/guanylyl cyclase, conserved site	IPR_Site	IPR018297	EXONT:000001,EXONT:000002,EXONT:002003,EXONT:002598
EXONT:008278	Alkaline phosphatase, active site	IPR_Site	IPR018299	EXONT:000001,EXONT:000002,EXONT:000018,EXONT:001893,EXONT:001957,EXONT:002093,EXONT:002094
EXONT:008279	Aminotransferase, class IV, conserved site	IPR_Site	IPR018300	EXONT:000001,EXONT:000002
EXONT:008280	Aromatic amino acid hydroxylase, iron/copper binding site	IPR_Site	IPR018301	EXONT:000001,EXONT:000002,EXONT:000005,EXONT:001912,EXONT:001937,EXONT:001938,EXONT:001939,EXONT:001940,EXONT:002167,EXONT:002255
EXONT:008289	Bacterial Fmu (Sun)/eukaryotic nucleolar NOL1/Nop2p, conserved site	IPR_Site	IPR018314	EXONT:000001,EXONT:000002,EXONT:000005,EXONT:001904,EXONT:001928,EXONT:001929,EXONT:001932,EXONT:001948,EXONT:002438,EXONT:002439
EXONT:008290	Glucosamine-6-phosphate deaminase activity	GO_molecular_function	GO:0004342	EXONT:000001,EXONT:000002,EXONT:002139,EXONT:002336,EXONT:002700,EXONT:002701
EXONT:008291	Glucosamine-6-phosphate isomerase, conserved site	IPR_Site	IPR018321	EXONT:000001,EXONT:000002,EXONT:002139,EXONT:002336,EXONT:002700,EXONT:002701,EXONT:008290
EXONT:008300	Carbonic anhydrase, alpha-class, conserved site	IPR_Site	IPR018338	EXONT:000001,EXONT:000002,EXONT:000005,EXONT:001937,EXONT:001938,EXONT:001939,EXONT:001940,EXONT:001941,EXONT:002003,EXONT:002078,EXONT:002616,EXONT:007709
EXONT:008307	Hexapeptide transferase, conserved site	IPR_Site	IPR018357	EXONT:000001,EXONT:000002,EXONT:001904
EXONT:008324	Enoyl-CoA hydratase/isomerase, conserved site	IPR_Site	IPR018376	EXONT:000001,EXONT:000002
EXONT:008345	Carbohydrate kinase, FGGY, conserved site	IPR_Site	IPR018483	EXONT:000001,EXONT:000002,EXONT:001904,EXONT:001905,EXONT:001906
EXONT:008346	Carbohydrate kinase, FGGY, N-terminal	IPR_Domain	IPR018484	EXONT:000001,EXONT:000002,EXONT:001904,EXONT:001905,EXONT:001906
EXONT:008347	Carbohydrate kinase, FGGY, C-terminal	IPR_Domain	IPR018485	EXONT:000001,EXONT:000002,EXONT:001904,EXONT:001905,EXONT:001906
EXONT:008354	Succinate dehydrogenase, cytochrome b subunit, conserved site	IPR_Site	IPR018495	EXONT:000001,EXONT:000002,EXONT:000004,EXONT:000013,EXONT:001912,EXONT:002480,EXONT:008355
EXONT:008355	Succinate dehydrogenase activity	GO_molecular_function	GO:0000104	EXONT:000001,EXONT:000002,EXONT:001912,EXONT:002480
EXONT:008357	Peptidase M13, C-terminal domain	IPR_Domain	IPR018497	EXONT:000001,EXONT:000002,EXONT:001893,EXONT:001894,EXONT:001897,EXONT:001899,EXONT:002024,EXONT:002361
EXONT:008364	Cytochrome c oxidase, subunit VIa, conserved site	IPR_Site	IPR018507	EXONT:000001,EXONT:000002,EXONT:000004,EXONT:000013,EXONT:001912,EXONT:002141,EXONT:002363,EXONT:002384,EXONT:002385,EXONT:002386,EXONT:002392,EXONT:002395,EXONT:003214,EXONT:003215,EXONT:003222,EXONT:003223,EXONT:003224
EXONT:008370	Rabaptin coiled-coil domain	IPR_Domain	IPR018514	EXONT:000001,EXONT:000002,EXONT:000005,EXONT:001885,EXONT:001887,EXONT:001893,EXONT:001943,EXONT:001944,EXONT:001963,EXONT:001964,EXONT:002046,EXONT:002047,EXONT:002051,EXONT:002052,EXONT:002054,EXONT:002055,EXONT:002056
EXONT:008371	Tuberin-type domain	IPR_Domain	IPR018515	EXONT:000001,EXONT:000002,EXONT:001887,EXONT:001893,EXONT:001943,EXONT:001944,EXONT:002046,EXONT:002047,EXONT:002051,EXONT:002052,EXONT:002054,EXONT:002055,EXONT:002056
EXONT:008372	TRNA dihydrouridine synthase activity	GO_molecular_function	GO:0017150	EXONT:000001,EXONT:000002,EXONT:001912,EXONT:002480
EXONT:008373	TRNA-dihydrouridine synthase, conserved site	IPR_Site	IPR018517	EXONT:000001,EXONT:000002,EXONT:000005,EXONT:001912,EXONT:001928,EXONT:001932,EXONT:001937,EXONT:001984,EXONT:001987,EXONT:001988,EXONT:001997,EXONT:002017,EXONT:002018,EXONT:002019,EXONT:002480,EXONT:008372
EXONT:008374	Di-trans-poly-cis-decaprenylcistransferase-like, conserved site	IPR_Site	IPR018520	EXONT:000001,EXONT:000002,EXONT:001904,EXONT:003072
EXONT:008375	DNA topoisomerase I, active site	IPR_Site	IPR018521	EXONT:000001,EXONT:000002,EXONT:000005,EXONT:000018,EXONT:001928,EXONT:001929,EXONT:001930,EXONT:001932,EXONT:002139,EXONT:003176,EXONT:005276
EXONT:008376	DNA topoisomerase, type IIA, conserved site	IPR_Site	IPR018522	EXONT:000001,EXONT:000002,EXONT:000005,EXONT:001893,EXONT:001928,EXONT:001929,EXONT:001930,EXONT:001932,EXONT:001937,EXONT:001943,EXONT:001944,EXONT:001984,EXONT:001985,EXONT:001986,EXONT:001987,EXONT:001988,EXONT:001989,EXONT:001990,EXONT:001991,EXONT:001992,EXONT:001993,EXONT:001994,EXONT:001995,EXONT:001996,EXONT:001997,EXONT:001998,EXONT:001999,EXONT:002054,EXONT:002055,EXONT:002139,EXONT:002…
EXONT:008378	DNA/RNA non-specific endonuclease, active site	IPR_Site	IPR018524	EXONT:000001,EXONT:000002,EXONT:000005,EXONT:000018,EXONT:001893,EXONT:001928,EXONT:001929,EXONT:001932,EXONT:001937,EXONT:001938,EXONT:001939
EXONT:008380	Fucosidase activity	GO_molecular_function	GO:0015928	EXONT:000001,EXONT:000002,EXONT:001893,EXONT:001920,EXONT:002111
EXONT:008381	Alpha-L-fucosidase activity	GO_molecular_function	GO:0004560	EXONT:000001,EXONT:000002,EXONT:001893,EXONT:001920,EXONT:002111,EXONT:008380
EXONT:008382	Glycoside hydrolase, family 29, conserved site	IPR_Site	IPR018526	EXONT:000001,EXONT:000002,EXONT:001893,EXONT:001920,EXONT:002111,EXONT:008380,EXONT:008381
EXONT:008518	RIO kinase, conserved site	IPR_Site	IPR018935	EXONT:000001,EXONT:000002,EXONT:000005,EXONT:001904,EXONT:001905,EXONT:001906,EXONT:001910,EXONT:001928,EXONT:001932,EXONT:001937,EXONT:001984,EXONT:001985,EXONT:001986,EXONT:001987,EXONT:001988,EXONT:001989,EXONT:001990,EXONT:001991,EXONT:001992,EXONT:001993,EXONT:001994,EXONT:001995,EXONT:001996,EXONT:001997,EXONT:001998,EXONT:001999,EXONT:002248,EXONT:002249
EXONT:008519	Phosphatidylinositol 3/4-kinase, conserved site	IPR_Site	IPR018936	EXONT:000001,EXONT:000002,EXONT:001904,EXONT:001905,EXONT:001906
EXONT:008522	Tyrosine-protein kinase, receptor Tie-2, Ig-like domain 1, N-terminal	IPR_Domain	IPR018941	EXONT:000001,EXONT:000002,EXONT:000003,EXONT:000005,EXONT:000012,EXONT:001904,EXONT:001905,EXONT:001906,EXONT:001910,EXONT:001928,EXONT:001932,EXONT:001937,EXONT:001984,EXONT:001985,EXONT:001986,EXONT:001987,EXONT:001988,EXONT:001989,EXONT:001990,EXONT:001991,EXONT:001992,EXONT:001993,EXONT:001994,EXONT:001995,EXONT:001996,EXONT:001997,EXONT:001998,EXONT:001999,EXONT:002242,EXONT:002243,EXONT:002…
EXONT:008524	DNA polymerase lambda, fingers domain	IPR_Domain	IPR018944	EXONT:000001,EXONT:000002,EXONT:000005,EXONT:001904,EXONT:001905,EXONT:001928,EXONT:001929,EXONT:001930,EXONT:001932,EXONT:002067,EXONT:002068
EXONT:008528	Fumarase C, C-terminal	IPR_Domain	IPR018951	EXONT:000001,EXONT:000002,EXONT:002003
EXONT:008552	ATP-dependent 3'-5' DNA helicase activity	GO_molecular_function	GO:0043140	EXONT:000001,EXONT:000002,EXONT:001893,EXONT:001943,EXONT:001944,EXONT:002054,EXONT:002055,EXONT:002333,EXONT:002350,EXONT:002351,EXONT:002352,EXONT:002353,EXONT:002666,EXONT:002667,EXONT:002668,EXONT:008554
EXONT:008553	RQC domain	IPR_Domain	IPR018982	EXONT:000001,EXONT:000002,EXONT:001893,EXONT:001943,EXONT:001944,EXONT:002054,EXONT:002055,EXONT:002333,EXONT:002350,EXONT:002351,EXONT:002352,EXONT:002353,EXONT:002666,EXONT:002667,EXONT:002668,EXONT:008552,EXONT:008554
EXONT:008554	3'-5' DNA helicase activity	GO_molecular_function	GO:0043138	EXONT:000001,EXONT:000002,EXONT:001893,EXONT:001943,EXONT:001944,EXONT:002054,EXONT:002055,EXONT:002333,EXONT:002666
EXONT:008558	Thrombin light chain	IPR_Domain	IPR018992	EXONT:000001,EXONT:000002,EXONT:001893,EXONT:001894,EXONT:001897,EXONT:001899,EXONT:001980,EXONT:001981,EXONT:002074
EXONT:008563	RNA helicase UPF1, UPF2-interacting domain	IPR_Domain	IPR018999	EXONT:000001,EXONT:000002,EXONT:000005,EXONT:001893,EXONT:001928,EXONT:001929,EXONT:001930,EXONT:001932,EXONT:001937,EXONT:001938,EXONT:001939,EXONT:001940,EXONT:001941,EXONT:001943,EXONT:001944,EXONT:001984,EXONT:001985,EXONT:001986,EXONT:001987,EXONT:001988,EXONT:001989,EXONT:001990,EXONT:001991,EXONT:001992,EXONT:001993,EXONT:001994,EXONT:001995,EXONT:001996,EXONT:001997,EXONT:001998,EXONT:001…
EXONT:008600	Aspartic peptidase, DDI1-type	IPR_Domain	IPR019103	EXONT:000001,EXONT:000002,EXONT:000011,EXONT:001893,EXONT:001894,EXONT:001897,EXONT:001899,EXONT:001925,EXONT:001927,EXONT:006637
EXONT:008689	Histone acetyl transferase HAT1 N-terminal	IPR_Domain	IPR019467	EXONT:000001,EXONT:000002,EXONT:001904,EXONT:002032,EXONT:002033,EXONT:002034,EXONT:002035,EXONT:002036,EXONT:002060,EXONT:002061
EXONT:008694	Ubiquitin-ubiquitin ligase activity	GO_molecular_function	GO:0034450	EXONT:000001,EXONT:000002,EXONT:001904,EXONT:002302
EXONT:008695	Ubiquitin conjugation factor E4, core	IPR_Domain	IPR019474	EXONT:000001,EXONT:000002,EXONT:001904,EXONT:002302,EXONT:008694
EXONT:008700	Peroxiredoxin, C-terminal	IPR_Domain	IPR019479	EXONT:000001,EXONT:000002,EXONT:001912,EXONT:001913,EXONT:003752
EXONT:008703	Zinc finger, V(D)J recombination-activating protein 1	IPR_Domain	IPR019485	EXONT:000001,EXONT:000002,EXONT:000005,EXONT:001893,EXONT:001902,EXONT:001928,EXONT:001929,EXONT:001932,EXONT:001957,EXONT:002342,EXONT:002343,EXONT:006531
EXONT:008715	Protein kinase A anchor protein, nuclear localisation signal domain	IPR_Domain	IPR019510	EXONT:000001,EXONT:000002,EXONT:005488
EXONT:008757	NADH:ubiquinone oxidoreductase, subunit G, iron-sulphur binding	IPR_Domain	IPR019574	EXONT:000001,EXONT:000002,EXONT:001912
EXONT:008759	Pyridoxine 5'-phosphate oxidase, dimerisation, C-terminal	IPR_Domain	IPR019576	EXONT:000001,EXONT:000002,EXONT:001912,EXONT:003429
EXONT:008773	Oxoglutarate/iron-dependent oxygenase, C-terminal degradation domain	IPR_Domain	IPR019601	EXONT:000001,EXONT:000002,EXONT:000005,EXONT:001912,EXONT:001937,EXONT:001938,EXONT:001939,EXONT:001940,EXONT:001984,EXONT:001988,EXONT:002116,EXONT:002170,EXONT:002211,EXONT:002255,EXONT:002829,EXONT:002831,EXONT:004193,EXONT:004194,EXONT:004674,EXONT:004675
EXONT:008793	Pyridoxamine 5'-phosphate oxidase, conserved site	IPR_Site	IPR019740	EXONT:000001,EXONT:000002,EXONT:001912,EXONT:003429
EXONT:008802	Peptidase S26A, signal peptidase I, serine active site	IPR_Site	IPR019756	EXONT:000001,EXONT:000002,EXONT:000018,EXONT:001893,EXONT:001894,EXONT:001897,EXONT:001980,EXONT:001981
EXONT:008804	Peptidase S26A, signal peptidase I, conserved site	IPR_Site	IPR019758	EXONT:000001,EXONT:000002,EXONT:001893,EXONT:001894,EXONT:001897,EXONT:001980,EXONT:001981
EXONT:008806	DNA-directed DNA polymerase, family A, conserved site	IPR_Site	IPR019760	EXONT:000001,EXONT:000002,EXONT:001904,EXONT:001905,EXONT:002067,EXONT:002068,EXONT:002069
EXONT:008817	Ferrochelatase, active site	IPR_Site	IPR019772	EXONT:000001,EXONT:000002,EXONT:000018,EXONT:002003,EXONT:008818
EXONT:008818	Ferrochelatase activity	GO_molecular_function	GO:0004325	EXONT:000001,EXONT:000002,EXONT:002003
EXONT:008819	Oxidoreductase activity, acting on paired donors, with incorporation or reduction of molecular oxygen, reduced pteridine as one donor, and incorporation of one atom of oxygen	GO_molecular_function	GO:0016714	EXONT:000001,EXONT:000002,EXONT:001912,EXONT:002167,EXONT:002170
EXONT:008820	Aromatic amino acid hydroxylase, C-terminal	IPR_Domain	IPR019774	EXONT:000001,EXONT:000002,EXONT:001912,EXONT:002167,EXONT:002170,EXONT:008819
EXONT:008825	Galactose-1-phosphate uridyl transferase, class I His-active site	IPR_Site	IPR019779	EXONT:000001,EXONT:000002,EXONT:000005,EXONT:000018,EXONT:001904,EXONT:001905,EXONT:001937,EXONT:001938,EXONT:001939,EXONT:001940,EXONT:001941,EXONT:002067,EXONT:004174,EXONT:004399
EXONT:008835	Glucose-6-phosphate dehydrogenase, active site	IPR_Site	IPR019796	EXONT:000001,EXONT:000002,EXONT:000018,EXONT:001912,EXONT:002015,EXONT:002266,EXONT:008836
EXONT:008836	Glucose-6-phosphate dehydrogenase activity	GO_molecular_function	GO:0004345	EXONT:000001,EXONT:000002,EXONT:001912,EXONT:002015,EXONT:002266
EXONT:008837	Glutamate 5-kinase activity	GO_molecular_function	GO:0004349	EXONT:000001,EXONT:000002,EXONT:001904,EXONT:001905,EXONT:001910,EXONT:002762,EXONT:002765
EXONT:008838	Glutamate 5-kinase, conserved site	IPR_Site	IPR019797	EXONT:000001,EXONT:000002,EXONT:001904,EXONT:001905,EXONT:001910,EXONT:002762,EXONT:002765,EXONT:008837
EXONT:008839	Serine hydroxymethyltransferase, pyridoxal phosphate binding site	IPR_Site	IPR019798	EXONT:000001,EXONT:000002,EXONT:000005,EXONT:001904,EXONT:001928,EXONT:001932,EXONT:001937,EXONT:001984,EXONT:002018,EXONT:002357,EXONT:002438,EXONT:003212,EXONT:008840
EXONT:008840	Glycine hydroxymethyltransferase activity	GO_molecular_function	GO:0004372	EXONT:000001,EXONT:000002,EXONT:001904,EXONT:002438,EXONT:003212
EXONT:008843	Glycoside hydrolase, family 35, conserved site	IPR_Site	IPR019801	EXONT:000001,EXONT:000002,EXONT:001893,EXONT:001920,EXONT:002111
EXONT:008852	Hexokinase activity	GO_molecular_function	GO:0004396	EXONT:000001,EXONT:000002,EXONT:001904,EXONT:001905,EXONT:001906,EXONT:001910,EXONT:001911
EXONT:008853	Hexokinase, conserved site	IPR_Site	IPR019807	EXONT:000001,EXONT:000002,EXONT:000005,EXONT:001904,EXONT:001905,EXONT:001906,EXONT:001910,EXONT:001911,EXONT:001928,EXONT:001932,EXONT:001937,EXONT:001984,EXONT:001985,EXONT:001986,EXONT:001987,EXONT:001988,EXONT:001989,EXONT:001990,EXONT:001991,EXONT:001992,EXONT:001993,EXONT:001994,EXONT:001995,EXONT:001996,EXONT:001997,EXONT:001998,EXONT:001999,EXONT:008852
EXONT:008856	Citrate synthase active site	IPR_Site	IPR019810	EXONT:000001,EXONT:000002,EXONT:000018,EXONT:001904,EXONT:002032,EXONT:002317
EXONT:008863	Isocitrate/isopropylmalate dehydrogenase, conserved site	IPR_Site	IPR019818	EXONT:000001,EXONT:000002,EXONT:000005,EXONT:001912,EXONT:001928,EXONT:001932,EXONT:001937,EXONT:001938,EXONT:001939,EXONT:001946,EXONT:001987,EXONT:001988,EXONT:001997,EXONT:002015,EXONT:002018,EXONT:002019,EXONT:002266,EXONT:002282
EXONT:008866	Kinesin, motor region, conserved site	IPR_Site	IPR019821	EXONT:000001,EXONT:000002,EXONT:000005,EXONT:001893,EXONT:001928,EXONT:001932,EXONT:001937,EXONT:001943,EXONT:001944,EXONT:001984,EXONT:001985,EXONT:001986,EXONT:001987,EXONT:001988,EXONT:001989,EXONT:001990,EXONT:001991,EXONT:001992,EXONT:001993,EXONT:001994,EXONT:001995,EXONT:001996,EXONT:001997,EXONT:001998,EXONT:001999,EXONT:002054,EXONT:002055,EXONT:002924,EXONT:002978
EXONT:008870	Carboxylesterase type B, active site	IPR_Site	IPR019826	EXONT:000001,EXONT:000002,EXONT:000011,EXONT:000018
EXONT:008872	Lysyl oxidase, conserved site	IPR_Site	IPR019828	EXONT:000001,EXONT:000002,EXONT:000005,EXONT:001912,EXONT:001937,EXONT:001938,EXONT:001939,EXONT:001940,EXONT:002171,EXONT:003429,EXONT:004532
EXONT:008876	Manganese/iron superoxide dismutase, N-terminal	IPR_Domain	IPR019831	EXONT:000001,EXONT:000002,EXONT:000005,EXONT:001912,EXONT:001937,EXONT:001938,EXONT:001939,EXONT:008147,EXONT:008148
EXONT:008877	Manganese/iron superoxide dismutase, C-terminal	IPR_Domain	IPR019832	EXONT:000001,EXONT:000002,EXONT:000005,EXONT:001912,EXONT:001937,EXONT:001938,EXONT:001939,EXONT:008147,EXONT:008148
EXONT:008878	Manganese/iron superoxide dismutase, binding site	IPR_Site	IPR019833	EXONT:000001,EXONT:000002,EXONT:000005,EXONT:001912,EXONT:001937,EXONT:001938,EXONT:001939,EXONT:008147,EXONT:008148
EXONT:008885	DNA polymerase family X, binding site	IPR_Site	IPR019843	EXONT:000001,EXONT:000002,EXONT:000005,EXONT:001904,EXONT:001905,EXONT:002067
EXONT:008887	Squalene/phytoene synthase, conserved site	IPR_Site	IPR019845	EXONT:000001,EXONT:000002,EXONT:001904,EXONT:003072
EXONT:008906	XPG conserved site	IPR_Site	IPR019974	EXONT:000001,EXONT:000002,EXONT:001893,EXONT:001957
EXONT:008910	ATPase, alpha/beta subunit, nucleotide-binding domain, active site	IPR_Site	IPR020003	EXONT:000001,EXONT:000002,EXONT:000005,EXONT:000018,EXONT:001928,EXONT:001932,EXONT:001937,EXONT:001984,EXONT:001985,EXONT:001986,EXONT:001987,EXONT:001988,EXONT:001989,EXONT:001990,EXONT:001991,EXONT:001992,EXONT:001993,EXONT:001994,EXONT:001995,EXONT:001996,EXONT:001997,EXONT:001998,EXONT:001999
EXONT:008916	5'-3' exonuclease, C-terminal domain	IPR_Domain	IPR020045	EXONT:000001,EXONT:000002,EXONT:000005,EXONT:001928,EXONT:001929,EXONT:001930,EXONT:001932
EXONT:008924	Glutamyl/glutaminyl-tRNA synthetase, class Ib, catalytic domain	IPR_Domain	IPR020058	EXONT:000001,EXONT:000002,EXONT:000005,EXONT:001902,EXONT:001928,EXONT:001932,EXONT:001937,EXONT:001984,EXONT:001985,EXONT:001986,EXONT:001987,EXONT:001988,EXONT:001989,EXONT:001990,EXONT:001991,EXONT:001992,EXONT:001993,EXONT:001994,EXONT:001995,EXONT:001996,EXONT:001997,EXONT:001998,EXONT:001999,EXONT:002418,EXONT:002419
EXONT:008925	Glutamyl/glutaminyl-tRNA synthetase, class Ib, anti-codon binding domain	IPR_Domain	IPR020059	EXONT:000001,EXONT:000002,EXONT:000005,EXONT:000011,EXONT:001902,EXONT:001928,EXONT:001932,EXONT:001937,EXONT:001984,EXONT:001985,EXONT:001986,EXONT:001987,EXONT:001988,EXONT:001989,EXONT:001990,EXONT:001991,EXONT:001992,EXONT:001993,EXONT:001994,EXONT:001995,EXONT:001996,EXONT:001997,EXONT:001998,EXONT:001999,EXONT:002418,EXONT:002419,EXONT:002420,EXONT:005912
EXONT:008926	Glutamyl/glutaminyl-tRNA synthetase, class Ib, alpha-bundle domain	IPR_Domain	IPR020061	EXONT:000001,EXONT:000002,EXONT:000005,EXONT:001902,EXONT:001928,EXONT:001932,EXONT:001937,EXONT:001984,EXONT:001985,EXONT:001986,EXONT:001987,EXONT:001988,EXONT:001989,EXONT:001990,EXONT:001991,EXONT:001992,EXONT:001993,EXONT:001994,EXONT:001995,EXONT:001996,EXONT:001997,EXONT:001998,EXONT:001999,EXONT:002418,EXONT:002419,EXONT:002420
EXONT:008935	Hydrolase activity, acting on ether bonds	GO_molecular_function	GO:0016801	EXONT:000001,EXONT:000002,EXONT:001893
EXONT:008936	Trialkylsulfonium hydrolase activity	GO_molecular_function	GO:0016802	EXONT:000001,EXONT:000002,EXONT:001893,EXONT:008935
EXONT:008937	Adenosylhomocysteinase activity	GO_molecular_function	GO:0004013	EXONT:000001,EXONT:000002,EXONT:001893,EXONT:008935,EXONT:008936
EXONT:008938	S-adenosyl-L-homocysteine hydrolase, conserved site	IPR_Site	IPR020082	EXONT:000001,EXONT:000002,EXONT:001893,EXONT:008935,EXONT:008936,EXONT:008937
EXONT:008940	NUDIX hydrolase, conserved site	IPR_Site	IPR020084	EXONT:000001,EXONT:000002,EXONT:001893
EXONT:008946	Pseudouridine synthase I, TruA, N-terminal	IPR_Domain	IPR020094	EXONT:000001,EXONT:000002,EXONT:000005,EXONT:001928,EXONT:001929,EXONT:001932,EXONT:001948,EXONT:002139,EXONT:003207,EXONT:004511,EXONT:008947
EXONT:008947	Pseudouridine synthase I, TruA, alpha/beta domain	IPR_Domain	IPR020097	EXONT:000001,EXONT:000002,EXONT:000005,EXONT:001928,EXONT:001929,EXONT:001932,EXONT:001948,EXONT:002139,EXONT:003207,EXONT:004511
EXONT:008948	Pseudouridine synthase I, TruA, C-terminal	IPR_Domain	IPR020095	EXONT:000001,EXONT:000002,EXONT:000005,EXONT:001928,EXONT:001929,EXONT:001932,EXONT:001948,EXONT:002139,EXONT:003207,EXONT:004511,EXONT:008947
EXONT:008950	Pseudouridine synthase TruD, conserved site	IPR_Site	IPR020119	EXONT:000001,EXONT:000002,EXONT:000005,EXONT:001928,EXONT:001929,EXONT:001932,EXONT:001948,EXONT:002139,EXONT:003207,EXONT:004511
EXONT:008967	NADH:ubiquinone oxidoreductase, 30kDa subunit, conserved site	IPR_Site	IPR020396	EXONT:000001,EXONT:000002,EXONT:001912,EXONT:002123
EXONT:008969	Dual specificity phosphatase, subgroup, catalytic domain	IPR_Domain	IPR020422	EXONT:000001,EXONT:000002,EXONT:001893,EXONT:001957,EXONT:002093,EXONT:002094,EXONT:002095,EXONT:002105,EXONT:002183
EXONT:008979	NUDIX hydrolase	IPR_Domain	IPR020476	EXONT:000001,EXONT:000002,EXONT:001893,EXONT:001971,EXONT:001972
EXONT:008989	Proton-transporting ATP synthase activity, rotational mechanism	GO_molecular_function	GO:0046933	EXONT:000001,EXONT:000002,EXONT:000004,EXONT:001893,EXONT:001943,EXONT:001944,EXONT:002054,EXONT:002055,EXONT:002350,EXONT:002351,EXONT:002363,EXONT:002384,EXONT:002385,EXONT:002386,EXONT:002392,EXONT:002395,EXONT:002447,EXONT:002542,EXONT:002648,EXONT:002651,EXONT:002652,EXONT:002653,EXONT:003214,EXONT:003215,EXONT:007378,EXONT:007382,EXONT:008991
EXONT:008990	ATPase, F1 complex, delta/epsilon subunit, N-terminal	IPR_Domain	IPR020546	EXONT:000001,EXONT:000002,EXONT:000004,EXONT:001893,EXONT:001943,EXONT:001944,EXONT:002054,EXONT:002055,EXONT:002350,EXONT:002351,EXONT:002363,EXONT:002384,EXONT:002385,EXONT:002386,EXONT:002392,EXONT:002395,EXONT:002447,EXONT:002542,EXONT:002648,EXONT:002651,EXONT:002652,EXONT:002653,EXONT:003214,EXONT:003215,EXONT:007378,EXONT:007382,EXONT:008989,EXONT:008991,EXONT:008992,EXONT:008993
EXONT:008991	ATPase activity, coupled to transmembrane movement of ions, rotational mechanism	GO_molecular_function	GO:0044769	EXONT:000001,EXONT:000002,EXONT:000004,EXONT:001893,EXONT:001943,EXONT:001944,EXONT:002054,EXONT:002055,EXONT:002350,EXONT:002351,EXONT:002363,EXONT:002384,EXONT:002385,EXONT:002386,EXONT:002447,EXONT:002542,EXONT:002648,EXONT:002651,EXONT:002652,EXONT:002653,EXONT:007378
EXONT:008992	Proton-transporting ATPase activity, rotational mechanism	GO_molecular_function	GO:0046961	EXONT:000001,EXONT:000002,EXONT:000004,EXONT:001893,EXONT:001943,EXONT:001944,EXONT:002054,EXONT:002055,EXONT:002350,EXONT:002351,EXONT:002363,EXONT:002384,EXONT:002385,EXONT:002386,EXONT:002392,EXONT:002395,EXONT:002447,EXONT:002542,EXONT:002648,EXONT:002651,EXONT:002652,EXONT:002653,EXONT:003214,EXONT:003215,EXONT:007378,EXONT:007382,EXONT:008991,EXONT:008993
EXONT:008993	Hydrogen-exporting ATPase activity	GO_molecular_function	GO:0036442	EXONT:000001,EXONT:000002,EXONT:000004,EXONT:001893,EXONT:001943,EXONT:001944,EXONT:002054,EXONT:002055,EXONT:002350,EXONT:002351,EXONT:002363,EXONT:002384,EXONT:002385,EXONT:002386,EXONT:002392,EXONT:002447,EXONT:002542,EXONT:002648,EXONT:002651,EXONT:002652,EXONT:002653,EXONT:007378,EXONT:007382
EXONT:008995	Fructose-1,6-bisphosphatase, active site	IPR_Site	IPR020548	EXONT:000001,EXONT:000002,EXONT:000018,EXONT:001893,EXONT:001957,EXONT:002093
EXONT:009001	Fumarate lyase, conserved site	IPR_Site	IPR020557	EXONT:000001,EXONT:000002
EXONT:009003	Phosphoribosylamine-glycine ligase activity	GO_molecular_function	GO:0004637	EXONT:000001,EXONT:000002,EXONT:001902,EXONT:002342
EXONT:009004	Phosphoribosylglycinamide synthetase, conserved site	IPR_Site	IPR020559	EXONT:000001,EXONT:000002,EXONT:001902,EXONT:002342,EXONT:009003
EXONT:009005	Phosphoribosylglycinamide synthetase, C-domain	IPR_Domain	IPR020560	EXONT:000001,EXONT:000002,EXONT:000011,EXONT:001902,EXONT:002342,EXONT:004295,EXONT:009003
EXONT:009007	Phosphoribosylglycinamide synthetase, N-terminal	IPR_Domain	IPR020562	EXONT:000001,EXONT:000002,EXONT:000011,EXONT:001902,EXONT:002342,EXONT:004124,EXONT:009003
EXONT:009020	Glycine cleavage system P-protein, N-terminal	IPR_Domain	IPR020580	EXONT:000001,EXONT:000002,EXONT:000011,EXONT:001912,EXONT:002043,EXONT:003429,EXONT:009021,EXONT:009022
EXONT:009021	Oxidoreductase activity, acting on the CH-NH2 group of donors, disulfide as acceptor	GO_molecular_function	GO:0016642	EXONT:000001,EXONT:000002,EXONT:001912,EXONT:003429
EXONT:009022	Glycine dehydrogenase (decarboxylating) activity	GO_molecular_function	GO:0004375	EXONT:000001,EXONT:000002,EXONT:001912,EXONT:003429,EXONT:009021
EXONT:009026	DNA recombination/repair protein RecA, monomer-monomer interface	IPR_Domain	IPR020587	EXONT:000001,EXONT:000002,EXONT:000005,EXONT:001893,EXONT:001928,EXONT:001929,EXONT:001930,EXONT:001932,EXONT:001937,EXONT:001943,EXONT:001944,EXONT:001984,EXONT:001985,EXONT:001986,EXONT:001987,EXONT:001988,EXONT:001989,EXONT:001990,EXONT:001991,EXONT:001992,EXONT:001993,EXONT:001994,EXONT:001995,EXONT:001996,EXONT:001997,EXONT:001998,EXONT:001999,EXONT:002054,EXONT:002055,EXONT:002350,EXONT:002…
EXONT:009027	DNA recombination/repair protein RecA-like, ATP-binding domain	IPR_Domain	IPR020588	EXONT:000001,EXONT:000002,EXONT:000005,EXONT:001893,EXONT:001928,EXONT:001929,EXONT:001930,EXONT:001932,EXONT:001937,EXONT:001943,EXONT:001944,EXONT:001984,EXONT:001985,EXONT:001986,EXONT:001987,EXONT:001988,EXONT:001989,EXONT:001990,EXONT:001991,EXONT:001992,EXONT:001993,EXONT:001994,EXONT:001995,EXONT:001996,EXONT:001997,EXONT:001998,EXONT:001999,EXONT:002054,EXONT:002055,EXONT:002350,EXONT:002…
EXONT:009030	Gamma-glutamyl phosphate reductase GPR, conserved site	IPR_Site	IPR020593	EXONT:000001,EXONT:000002,EXONT:001912,EXONT:002162,EXONT:002163,EXONT:002552
EXONT:009032	RRNA (adenine-N6,N6-)-dimethyltransferase activity	GO_molecular_function	GO:0000179	EXONT:000001,EXONT:000002,EXONT:001904,EXONT:002438,EXONT:002439,EXONT:002440,EXONT:002877,EXONT:002880,EXONT:004761,EXONT:009034
EXONT:009033	Ribosomal RNA adenine methylase transferase, conserved site	IPR_Site	IPR020596	EXONT:000001,EXONT:000002,EXONT:001904,EXONT:002438,EXONT:002439,EXONT:002440,EXONT:002877,EXONT:002880,EXONT:004761,EXONT:009032,EXONT:009034
EXONT:009034	RRNA (adenine) methyltransferase activity	GO_molecular_function	GO:0016433	EXONT:000001,EXONT:000002,EXONT:001904,EXONT:002438,EXONT:002439,EXONT:002440,EXONT:002880,EXONT:004761
EXONT:009035	Ribosomal RNA adenine methylase transferase, N-terminal	IPR_Domain	IPR020598	EXONT:000001,EXONT:000002,EXONT:001904,EXONT:002438,EXONT:002439,EXONT:002440,EXONT:002877,EXONT:002880,EXONT:004761,EXONT:009032,EXONT:009034
EXONT:009045	Thiolase, active site	IPR_Site	IPR020610	EXONT:000001,EXONT:000002,EXONT:000018,EXONT:001904,EXONT:002032,EXONT:002033
EXONT:009046	Copper type II, ascorbate-dependent monooxygenase, histidine-cluster-1 conserved site	IPR_Site	IPR020611	EXONT:000001,EXONT:000002,EXONT:001912,EXONT:002167,EXONT:002169,EXONT:002170
EXONT:009048	Thiolase, conserved site	IPR_Site	IPR020613	EXONT:000001,EXONT:000002,EXONT:001904,EXONT:002032,EXONT:002033
EXONT:009049	Thiolase, acyl-enzyme intermediate active site	IPR_Site	IPR020615	EXONT:000001,EXONT:000002,EXONT:000018,EXONT:001904,EXONT:002032,EXONT:002033
EXONT:009050	Thiolase, N-terminal	IPR_Domain	IPR020616	EXONT:000001,EXONT:000002,EXONT:001904,EXONT:002032,EXONT:002033
EXONT:009051	Thiolase, C-terminal	IPR_Domain	IPR020617	EXONT:000001,EXONT:000002,EXONT:001904,EXONT:002032,EXONT:002033
EXONT:009054	Dihydrodipicolinate synthetase, active site	IPR_Site	IPR020625	EXONT:000001,EXONT:000002,EXONT:000018,EXONT:002003
EXONT:009055	Formate-tetrahydrofolate ligase activity	GO_molecular_function	GO:0004329	EXONT:000001,EXONT:000002,EXONT:001902,EXONT:002342
EXONT:009056	Formate-tetrahydrofolate ligase, FTHFS, conserved site	IPR_Site	IPR020628	EXONT:000001,EXONT:000002,EXONT:000005,EXONT:001902,EXONT:001928,EXONT:001932,EXONT:001937,EXONT:001984,EXONT:001985,EXONT:001986,EXONT:001987,EXONT:001988,EXONT:001989,EXONT:001990,EXONT:001991,EXONT:001992,EXONT:001993,EXONT:001994,EXONT:001995,EXONT:001996,EXONT:001997,EXONT:001998,EXONT:001999,EXONT:002342,EXONT:009055
EXONT:009057	Tetrahydrofolate dehydrogenase/cyclohydrolase, catalytic domain	IPR_Domain	IPR020630	EXONT:000001,EXONT:000002,EXONT:001912,EXONT:003000,EXONT:003001,EXONT:009058
EXONT:009058	Methylenetetrahydrofolate dehydrogenase (NADP+) activity	GO_molecular_function	GO:0004488	EXONT:000001,EXONT:000002,EXONT:001912,EXONT:003000,EXONT:003001
EXONT:009059	Tetrahydrofolate dehydrogenase/cyclohydrolase, NAD(P)-binding domain	IPR_Domain	IPR020631	EXONT:000001,EXONT:000002,EXONT:000011,EXONT:001912,EXONT:002478,EXONT:003000,EXONT:003001,EXONT:009058
EXONT:009060	Thymidine kinase, conserved site	IPR_Site	IPR020633	EXONT:000001,EXONT:000002,EXONT:000005,EXONT:001904,EXONT:001905,EXONT:001910,EXONT:001928,EXONT:001932,EXONT:001937,EXONT:001984,EXONT:001985,EXONT:001986,EXONT:001987,EXONT:001988,EXONT:001989,EXONT:001990,EXONT:001991,EXONT:001992,EXONT:001993,EXONT:001994,EXONT:001995,EXONT:001996,EXONT:001997,EXONT:001998,EXONT:001999,EXONT:005167,EXONT:006850,EXONT:006851,EXONT:006852
EXONT:009061	Tyrosine-protein kinase, catalytic domain	IPR_Domain	IPR020635	EXONT:000001,EXONT:000002,EXONT:000005,EXONT:001904,EXONT:001905,EXONT:001906,EXONT:001910,EXONT:001928,EXONT:001932,EXONT:001937,EXONT:001984,EXONT:001985,EXONT:001986,EXONT:001987,EXONT:001988,EXONT:001989,EXONT:001990,EXONT:001991,EXONT:001992,EXONT:001993,EXONT:001994,EXONT:001995,EXONT:001996,EXONT:001997,EXONT:001998,EXONT:001999,EXONT:002212,EXONT:002248,EXONT:002406,EXONT:002705,EXONT:002…
EXONT:009063	DNA-directed RNA polymerase, 14-18kDa subunit, conserved site	IPR_Site	IPR020708	EXONT:000001,EXONT:000002,EXONT:000005,EXONT:001904,EXONT:001905,EXONT:001928,EXONT:001929,EXONT:001930,EXONT:001932,EXONT:002067,EXONT:002072,EXONT:002408
EXONT:009071	ATPase, F1 complex, OSCP/delta subunit, conserved site	IPR_Site	IPR020781	EXONT:000001,EXONT:000002,EXONT:000004,EXONT:001893,EXONT:001943,EXONT:001944,EXONT:002054,EXONT:002055,EXONT:002350,EXONT:002351,EXONT:002363,EXONT:002384,EXONT:002385,EXONT:002386,EXONT:002392,EXONT:002395,EXONT:002447,EXONT:002542,EXONT:002648,EXONT:002651,EXONT:002652,EXONT:002653,EXONT:003214,EXONT:003215,EXONT:007378,EXONT:007382,EXONT:008989,EXONT:008991
EXONT:009075	RNA polymerases, subunit N, zinc binding site	IPR_Site	IPR020789	EXONT:000001,EXONT:000002,EXONT:000005,EXONT:001904,EXONT:001905,EXONT:001928,EXONT:001929,EXONT:001930,EXONT:001932,EXONT:001937,EXONT:001938,EXONT:001939,EXONT:001940,EXONT:001941,EXONT:002067,EXONT:002072,EXONT:002408
EXONT:009085	Enolase, conserved site	IPR_Site	IPR020809	EXONT:000001,EXONT:000002,EXONT:000005,EXONT:001937,EXONT:001938,EXONT:001939,EXONT:001946,EXONT:002003,EXONT:002078,EXONT:002616,EXONT:009086
EXONT:009086	Phosphopyruvate hydratase activity	GO_molecular_function	GO:0004634	EXONT:000001,EXONT:000002,EXONT:002003,EXONT:002078,EXONT:002616
EXONT:009087	Enolase, C-terminal	IPR_Domain	IPR020810	EXONT:000001,EXONT:000002,EXONT:000005,EXONT:001937,EXONT:001938,EXONT:001939,EXONT:001946,EXONT:002003,EXONT:002078,EXONT:002616,EXONT:009086
EXONT:009088	Enolase, N-terminal	IPR_Domain	IPR020811	EXONT:000001,EXONT:000002,EXONT:000005,EXONT:001937,EXONT:001938,EXONT:001939,EXONT:001946,EXONT:002003,EXONT:002078,EXONT:002616,EXONT:009086
EXONT:009089	Fibrillarin, conserved site	IPR_Site	IPR020813	EXONT:000001,EXONT:000002,EXONT:000005,EXONT:001904,EXONT:001928,EXONT:001929,EXONT:001932,EXONT:001948,EXONT:002438,EXONT:002439
EXONT:009093	DNA repair nuclease, XPF-type/Helicase	IPR_Domain	IPR020819	EXONT:000001,EXONT:000002,EXONT:000005,EXONT:000011,EXONT:001893,EXONT:001928,EXONT:001929,EXONT:001930,EXONT:001932,EXONT:001957,EXONT:002081,EXONT:004524,EXONT:004525
EXONT:009094	Extracellular Endonuclease, subunit A	IPR_Domain	IPR020821	EXONT:000001,EXONT:000002,EXONT:000005,EXONT:001893,EXONT:001928,EXONT:001929,EXONT:001932,EXONT:001937,EXONT:001938,EXONT:001939,EXONT:002916
EXONT:009095	Phenylalanyl-tRNA synthetase, B3/B4	IPR_Domain	IPR020825	EXONT:000001,EXONT:000002,EXONT:000005,EXONT:001902,EXONT:001928,EXONT:001929,EXONT:001932,EXONT:001948,EXONT:002418,EXONT:002419,EXONT:002420,EXONT:003952,EXONT:004211
EXONT:009098	Glyceraldehyde 3-phosphate dehydrogenase, NAD(P) binding domain	IPR_Domain	IPR020828	EXONT:000001,EXONT:000002,EXONT:001912,EXONT:002162,EXONT:002163
EXONT:009099	Glyceraldehyde 3-phosphate dehydrogenase, catalytic domain	IPR_Domain	IPR020829	EXONT:000001,EXONT:000002,EXONT:001912,EXONT:002162,EXONT:002163
EXONT:009100	Glyceraldehyde 3-phosphate dehydrogenase, active site	IPR_Site	IPR020830	EXONT:000001,EXONT:000002,EXONT:000018,EXONT:001912,EXONT:002162,EXONT:002163
EXONT:009101	Lipoxygenase, iron binding site	IPR_Site	IPR020833	EXONT:000001,EXONT:000002,EXONT:000005,EXONT:001912,EXONT:001937,EXONT:001938,EXONT:001939,EXONT:003903,EXONT:004194,EXONT:005049
EXONT:009102	Lipoxygenase, conserved site	IPR_Site	IPR020834	EXONT:000001,EXONT:000002,EXONT:000005,EXONT:001912,EXONT:001937,EXONT:001938,EXONT:001939,EXONT:003903,EXONT:004194,EXONT:005049
EXONT:009105	DBINO domain	IPR_Domain	IPR020838	EXONT:000001,EXONT:000002,EXONT:001893,EXONT:001943
EXONT:009109	Polyketide synthase, enoylreductase	IPR_Domain	IPR020843	EXONT:000001,EXONT:000002,EXONT:001904,EXONT:001912,EXONT:002032,EXONT:002033
EXONT:009113	AP endonuclease 1, binding site	IPR_Site	IPR020847	EXONT:000001,EXONT:000002,EXONT:000005,EXONT:001893,EXONT:001928,EXONT:001929,EXONT:001930,EXONT:001932,EXONT:001957,EXONT:002081,EXONT:002082
EXONT:009114	AP endonuclease 1, conserved site	IPR_Site	IPR020848	EXONT:000001,EXONT:000002,EXONT:000005,EXONT:001893,EXONT:001928,EXONT:001929,EXONT:001930,EXONT:001932,EXONT:001957,EXONT:002081,EXONT:002082
EXONT:009115	Ureohydrolase, manganese-binding site	IPR_Site	IPR020855	EXONT:000001,EXONT:000002,EXONT:000005,EXONT:001893,EXONT:001937,EXONT:001938,EXONT:001939,EXONT:002000,EXONT:006704
EXONT:009120	Triosephosphate isomerase, active site	IPR_Site	IPR020861	EXONT:000001,EXONT:000002,EXONT:000018,EXONT:002139,EXONT:002700,EXONT:002701,EXONT:009121
EXONT:009121	Triose-phosphate isomerase activity	GO_molecular_function	GO:0004807	EXONT:000001,EXONT:000002,EXONT:002139,EXONT:002700,EXONT:002701
EXONT:009125	Tetrahydrofolate dehydrogenase/cyclohydrolase, conserved site	IPR_Site	IPR020867	EXONT:000001,EXONT:000002
EXONT:009129	Cyclophilin-type peptidyl-prolyl cis-trans isomerase, conserved site	IPR_Site	IPR020892	EXONT:000001,EXONT:000002,EXONT:002139,EXONT:003150,EXONT:003151
EXONT:009142	Short-chain dehydrogenase/reductase, conserved site	IPR_Site	IPR020904	EXONT:000001,EXONT:000002,EXONT:001912
EXONT:009149	Thymidylate synthase, active site	IPR_Site	IPR020940	EXONT:000001,EXONT:000002,EXONT:000018,EXONT:001904,EXONT:002438,EXONT:002439,EXONT:009150,EXONT:009151
EXONT:009150	5,10-methylenetetrahydrofolate-dependent methyltransferase activity	GO_molecular_function	GO:0042083	EXONT:000001,EXONT:000002,EXONT:001904,EXONT:002438,EXONT:002439
EXONT:009151	Thymidylate synthase activity	GO_molecular_function	GO:0004799	EXONT:000001,EXONT:000002,EXONT:001904,EXONT:002438,EXONT:002439,EXONT:009150
EXONT:009233	Thiolester hydrolase activity	GO_molecular_function	GO:0016790	EXONT:000001,EXONT:000002,EXONT:001893,EXONT:001957
EXONT:009235	Pyridoxal-phosphate binding site	IPR_Site	IPR021115	EXONT:000001,EXONT:000002,EXONT:000005,EXONT:002003,EXONT:002004,EXONT:002117
EXONT:009245	Peptidase M10A, cysteine switch, zinc binding site	IPR_Site	IPR021158	EXONT:000001,EXONT:000002,EXONT:000005,EXONT:001893,EXONT:001894,EXONT:001897,EXONT:001899,EXONT:001937,EXONT:001938,EXONT:001939,EXONT:001940,EXONT:001941,EXONT:002024,EXONT:002361
EXONT:009247	Tyrosine 3-monooxygenase activity	GO_molecular_function	GO:0004511	EXONT:000001,EXONT:000002,EXONT:001912,EXONT:002167,EXONT:002170,EXONT:008819
EXONT:009248	Tyrosine hydroxylase, conserved site	IPR_Site	IPR021164	EXONT:000001,EXONT:000002,EXONT:001912,EXONT:002167,EXONT:002170,EXONT:008819,EXONT:009247
EXONT:009282	Telomere-length maintenance and DNA damage repair	IPR_Domain	IPR021668	EXONT:000001,EXONT:000002,EXONT:001904,EXONT:001905,EXONT:001906,EXONT:001910,EXONT:002248,EXONT:002249
EXONT:009283	C-terminal domain of RIG-I	IPR_Domain	IPR021673	EXONT:000001,EXONT:000002,EXONT:001893,EXONT:001943
EXONT:009291	Zinc finger, CCCH-type, TRM13	IPR_Domain	IPR021721	EXONT:000001,EXONT:000002,EXONT:001904,EXONT:002438,EXONT:002439
EXONT:009306	UDP-glucuronate decarboxylase activity	GO_molecular_function	GO:0048040	EXONT:000001,EXONT:000002,EXONT:002003,EXONT:002004,EXONT:002117
EXONT:009307	UDP-glucuronate decarboxylase N-terminal	IPR_Domain	IPR021761	EXONT:000001,EXONT:000002,EXONT:002003,EXONT:002004,EXONT:002117,EXONT:009306
EXONT:009319	Peptidase M10A, matrix metallopeptidase, C-terminal	IPR_Domain	IPR021805	EXONT:000001,EXONT:000002,EXONT:001893,EXONT:001894,EXONT:001897,EXONT:001899,EXONT:002024,EXONT:002361
EXONT:009336	Telomerase ribonucleoprotein complex - RNA-binding domain	IPR_Domain	IPR021891	EXONT:000001,EXONT:000002,EXONT:001904,EXONT:001905,EXONT:002067,EXONT:002068,EXONT:005783
EXONT:009378	IkappaB kinase activity	GO_molecular_function	GO:0008384	EXONT:000001,EXONT:000002,EXONT:001904,EXONT:001905,EXONT:001906,EXONT:001910,EXONT:002248,EXONT:002249
EXONT:009379	I-kappa-kinase-beta NEMO binding domain	IPR_Domain	IPR022007	EXONT:000001,EXONT:000002,EXONT:001904,EXONT:001905,EXONT:001906,EXONT:001910,EXONT:002248,EXONT:002249,EXONT:009378
EXONT:009424	Calcium-transporting ATPase activity	GO_molecular_function	GO:0005388	EXONT:000001,EXONT:000002,EXONT:000004,EXONT:001893,EXONT:001943,EXONT:001944,EXONT:002054,EXONT:002055,EXONT:002350,EXONT:002351,EXONT:002363,EXONT:002384,EXONT:002385,EXONT:002386,EXONT:002392,EXONT:002395,EXONT:002396,EXONT:002397,EXONT:002398,EXONT:002447,EXONT:002542,EXONT:002648,EXONT:002651,EXONT:002652,EXONT:002653,EXONT:007378,EXONT:007379,EXONT:007382
EXONT:009425	Calcium transporting P-type ATPase, C-terminal, plasma membrane	IPR_Domain	IPR022141	EXONT:000001,EXONT:000002,EXONT:000004,EXONT:001893,EXONT:001943,EXONT:001944,EXONT:002054,EXONT:002055,EXONT:002350,EXONT:002351,EXONT:002363,EXONT:002384,EXONT:002385,EXONT:002386,EXONT:002392,EXONT:002395,EXONT:002396,EXONT:002397,EXONT:002398,EXONT:002447,EXONT:002542,EXONT:002648,EXONT:002651,EXONT:002652,EXONT:002653,EXONT:007378,EXONT:007379,EXONT:007382,EXONT:009424
EXONT:009440	Mitochondrial degradasome RNA helicase subunit, C-terminal domain	IPR_Domain	IPR022192	EXONT:000001,EXONT:000002,EXONT:001893,EXONT:001943
EXONT:009452	Casein kinase 1 gamma C-terminal	IPR_Domain	IPR022247	EXONT:000001,EXONT:000002,EXONT:001904,EXONT:001905,EXONT:001906,EXONT:001910,EXONT:002248,EXONT:002249
EXONT:009466	Phenylalanine/histidine ammonia-lyases, active site	IPR_Site	IPR022313	EXONT:000001,EXONT:000002,EXONT:000018,EXONT:002003,EXONT:004199,EXONT:004200
EXONT:009477	Lactate/malate dehydrogenase, C-terminal	IPR_Domain	IPR022383	EXONT:000001,EXONT:000002,EXONT:001912,EXONT:002015,EXONT:002266,EXONT:007752
EXONT:009480	Peptidase S8, subtilisin, His-active site	IPR_Site	IPR022398	EXONT:000001,EXONT:000002,EXONT:000011,EXONT:000018
EXONT:009487	Quinolinate phosphoribosyl transferase, N-terminal	IPR_Domain	IPR022412	EXONT:000001,EXONT:000002,EXONT:001904,EXONT:002041,EXONT:003315
EXONT:009488	ATP:guanido phosphotransferase, N-terminal	IPR_Domain	IPR022413	EXONT:000001,EXONT:000002,EXONT:001904,EXONT:001905,EXONT:001910
EXONT:009489	ATP:guanido phosphotransferase, catalytic domain	IPR_Domain	IPR022414	EXONT:000001,EXONT:000002,EXONT:001904,EXONT:001905,EXONT:001910,EXONT:005220
EXONT:009490	ATP:guanido phosphotransferase active site	IPR_Site	IPR022415	EXONT:000001,EXONT:000002,EXONT:000018,EXONT:001904,EXONT:001905,EXONT:001910
EXONT:009492	Hydroxymethylbilane synthase activity	GO_molecular_function	GO:0004418	EXONT:000001,EXONT:000002,EXONT:001904,EXONT:003072
EXONT:009493	Porphobilinogen deaminase, N-terminal	IPR_Domain	IPR022417	EXONT:000001,EXONT:000002,EXONT:001904,EXONT:003072,EXONT:009492
EXONT:009494	Porphobilinogen deaminase, C-terminal	IPR_Domain	IPR022418	EXONT:000001,EXONT:000002,EXONT:001904,EXONT:003072,EXONT:009492
EXONT:009495	Porphobilinogen deaminase, dipyrromethane cofactor binding site	IPR_Site	IPR022419	EXONT:000001,EXONT:000002,EXONT:000005,EXONT:001904,EXONT:003072,EXONT:009492
EXONT:009509	6-pyruvoyl tetrahydropterin synthase, histidine active site	IPR_Site	IPR022469	EXONT:000001,EXONT:000002,EXONT:000018,EXONT:002003,EXONT:002078,EXONT:003039,EXONT:009510
EXONT:009510	6-pyruvoyltetrahydropterin synthase activity	GO_molecular_function	GO:0003874	EXONT:000001,EXONT:000002,EXONT:002003,EXONT:002078,EXONT:003039
EXONT:009511	6-pyruvoyl tetrahydropterin synthase, cysteine active site	IPR_Site	IPR022470	EXONT:000001,EXONT:000002,EXONT:000018,EXONT:002003,EXONT:002078,EXONT:003039,EXONT:009510
EXONT:009556	Methionine adenosyltransferase activity	GO_molecular_function	GO:0004478	EXONT:000001,EXONT:000002,EXONT:001904,EXONT:003072
EXONT:009557	S-adenosylmethionine synthetase, N-terminal	IPR_Domain	IPR022628	EXONT:000001,EXONT:000002,EXONT:001904,EXONT:003072,EXONT:009556
EXONT:009558	S-adenosylmethionine synthetase, central domain	IPR_Domain	IPR022629	EXONT:000001,EXONT:000002,EXONT:001904,EXONT:003072,EXONT:009556
EXONT:009559	S-adenosylmethionine synthetase, C-terminal	IPR_Domain	IPR022630	EXONT:000001,EXONT:000002,EXONT:001904,EXONT:003072,EXONT:009556
EXONT:009560	S-adenosylmethionine synthetase, conserved site	IPR_Site	IPR022631	EXONT:000001,EXONT:000002,EXONT:001904,EXONT:003072,EXONT:009556
EXONT:009564	S-adenosylmethionine synthetase superfamily	IPR_Domain	IPR022636	EXONT:000001,EXONT:000002,EXONT:001904,EXONT:003072,EXONT:009556
EXONT:009569	Orn/DAP/Arg decarboxylase 2, C-terminal	IPR_Domain	IPR022643	EXONT:000001,EXONT:000002,EXONT:005431
EXONT:009570	Orn/DAP/Arg decarboxylase 2, N-terminal	IPR_Domain	IPR022644	EXONT:000001,EXONT:000002
EXONT:009593	Hexokinase, N-terminal	IPR_Domain	IPR022672	EXONT:000001,EXONT:000002,EXONT:000005,EXONT:001904,EXONT:001905,EXONT:001906,EXONT:001928,EXONT:001932,EXONT:001937,EXONT:001984,EXONT:001985,EXONT:001986,EXONT:001987,EXONT:001988,EXONT:001989,EXONT:001990,EXONT:001991,EXONT:001992,EXONT:001993,EXONT:001994,EXONT:001995,EXONT:001996,EXONT:001997,EXONT:001998,EXONT:001999
EXONT:009594	Hexokinase, C-terminal	IPR_Domain	IPR022673	EXONT:000001,EXONT:000002,EXONT:000005,EXONT:001904,EXONT:001905,EXONT:001906,EXONT:001928,EXONT:001932,EXONT:001937,EXONT:001984,EXONT:001985,EXONT:001986,EXONT:001987,EXONT:001988,EXONT:001989,EXONT:001990,EXONT:001991,EXONT:001992,EXONT:001993,EXONT:001994,EXONT:001995,EXONT:001996,EXONT:001997,EXONT:001998,EXONT:001999
EXONT:009595	Glucose-6-phosphate dehydrogenase, NAD-binding	IPR_Domain	IPR022674	EXONT:000001,EXONT:000002,EXONT:000005,EXONT:000011,EXONT:001912,EXONT:001928,EXONT:001932,EXONT:001987,EXONT:001988,EXONT:001997,EXONT:002015,EXONT:002018,EXONT:002019,EXONT:002160,EXONT:002266,EXONT:002478,EXONT:008836
EXONT:009596	Glucose-6-phosphate dehydrogenase, C-terminal	IPR_Domain	IPR022675	EXONT:000001,EXONT:000002,EXONT:000005,EXONT:001912,EXONT:001928,EXONT:001932,EXONT:001987,EXONT:001988,EXONT:001997,EXONT:002015,EXONT:002018,EXONT:002019,EXONT:002160,EXONT:002266,EXONT:008836
EXONT:009597	Glycylpeptide N-tetradecanoyltransferase activity	GO_molecular_function	GO:0004379	EXONT:000001,EXONT:000002,EXONT:001904,EXONT:002032,EXONT:002033,EXONT:002036,EXONT:009599
EXONT:009598	Myristoyl-CoA:protein N-myristoyltransferase, N-terminal	IPR_Domain	IPR022676	EXONT:000001,EXONT:000002,EXONT:001904,EXONT:002032,EXONT:002033,EXONT:002036,EXONT:009597,EXONT:009599
EXONT:009599	Myristoyltransferase activity	GO_molecular_function	GO:0019107	EXONT:000001,EXONT:000002,EXONT:001904,EXONT:002032,EXONT:002033
EXONT:009600	Myristoyl-CoA:protein N-myristoyltransferase, C-terminal	IPR_Domain	IPR022677	EXONT:000001,EXONT:000002,EXONT:001904,EXONT:002032,EXONT:002033,EXONT:002036,EXONT:009597,EXONT:009599
EXONT:009601	Myristoyl-CoA:protein N-myristoyltransferase, conserved site	IPR_Site	IPR022678	EXONT:000001,EXONT:000002,EXONT:001904,EXONT:002032,EXONT:002033,EXONT:002036,EXONT:009597,EXONT:009599
EXONT:009619	Serine/threonine-protein kinase, C-terminal	IPR_Domain	IPR022708	EXONT:000001,EXONT:000002,EXONT:001904,EXONT:001905,EXONT:001906,EXONT:001910,EXONT:002248,EXONT:002249
EXONT:009656	Peptidase S54, rhomboid domain	IPR_Domain	IPR022764	EXONT:000001,EXONT:000002,EXONT:001893,EXONT:001894,EXONT:001897,EXONT:001899,EXONT:001980,EXONT:001981,EXONT:002074
EXONT:009663	CDKN3 domain	IPR_Domain	IPR022778	EXONT:000001,EXONT:000002,EXONT:001893,EXONT:001957,EXONT:002093,EXONT:002094,EXONT:002095,EXONT:002107
EXONT:009671	Nucleoside diphosphate kinase, active site	IPR_Site	IPR023005	EXONT:000001,EXONT:000002,EXONT:000011,EXONT:000018
EXONT:009678	Hydroxymethylglutaryl-CoA reductase (NADPH) activity	GO_molecular_function	GO:0004420	EXONT:000001,EXONT:000002,EXONT:001912,EXONT:002015,EXONT:002266
EXONT:009679	Hydroxymethylglutaryl-CoA reductase, class I/II, catalytic domain	IPR_Domain	IPR023074	EXONT:000001,EXONT:000002,EXONT:001912,EXONT:002015,EXONT:002266,EXONT:009678
EXONT:009680	Hydroxymethylglutaryl-CoA reductase, class I/II, conserved site	IPR_Site	IPR023076	EXONT:000001,EXONT:000002,EXONT:001912,EXONT:002015,EXONT:002266,EXONT:009678
EXONT:009686	Metalloprotease catalytic domain, predicted	IPR_Domain	IPR023091	EXONT:000001,EXONT:000002,EXONT:001893,EXONT:001894,EXONT:001897,EXONT:001899,EXONT:002024,EXONT:002361
EXONT:009690	Phosphoglucose isomerase, C-terminal	IPR_Domain	IPR023096	EXONT:000001,EXONT:000002,EXONT:002139,EXONT:002700,EXONT:002701,EXONT:005737
EXONT:009697	Fatty acid synthase, domain 2	IPR_Domain	IPR023102	EXONT:000001,EXONT:000002,EXONT:001893,EXONT:001904,EXONT:001912,EXONT:001957,EXONT:002003,EXONT:002015,EXONT:002032,EXONT:002033,EXONT:002034,EXONT:002078,EXONT:002266,EXONT:002480,EXONT:002481,EXONT:002616,EXONT:003813,EXONT:006932,EXONT:009233,EXONT:009698,EXONT:009699,EXONT:009700,EXONT:009701,EXONT:009702,EXONT:009703,EXONT:009704,EXONT:009705,EXONT:009706,EXONT:009707,EXONT:009708,EXONT:009…
EXONT:009698	3-oxoacyl-[acyl-carrier-protein] reductase (NADPH) activity	GO_molecular_function	GO:0004316	EXONT:000001,EXONT:000002,EXONT:001904,EXONT:001912,EXONT:002015,EXONT:002032,EXONT:002033,EXONT:002266,EXONT:003813
EXONT:009699	Enoyl-[acyl-carrier-protein] reductase (NADPH, B-specific) activity	GO_molecular_function	GO:0004319	EXONT:000001,EXONT:000002,EXONT:001904,EXONT:001912,EXONT:002032,EXONT:002033,EXONT:002480,EXONT:002481,EXONT:003813
EXONT:009700	Acyl-[acyl-carrier-protein] hydrolase activity	GO_molecular_function	GO:0016297	EXONT:000001,EXONT:000002,EXONT:001893,EXONT:001904,EXONT:001957,EXONT:002032,EXONT:002033,EXONT:003813,EXONT:009233
EXONT:009701	[acyl-carrier-protein] S-acetyltransferase activity	GO_molecular_function	GO:0004313	EXONT:000001,EXONT:000002,EXONT:001904,EXONT:002032,EXONT:002033,EXONT:002034,EXONT:003813,EXONT:009708,EXONT:009709
EXONT:009702	[acyl-carrier-protein] S-malonyltransferase activity	GO_molecular_function	GO:0004314	EXONT:000001,EXONT:000002,EXONT:001904,EXONT:002032,EXONT:002033,EXONT:003813,EXONT:009709,EXONT:009710,EXONT:009711
EXONT:009703	3-hydroxypalmitoyl-[acyl-carrier-protein] dehydratase activity	GO_molecular_function	GO:0004317	EXONT:000001,EXONT:000002,EXONT:001904,EXONT:002003,EXONT:002032,EXONT:002033,EXONT:002078,EXONT:002616,EXONT:003813,EXONT:009704
EXONT:009704	3-hydroxyacyl-[acyl-carrier-protein] dehydratase activity	GO_molecular_function	GO:0019171	EXONT:000001,EXONT:000002,EXONT:002003,EXONT:002078,EXONT:002616
EXONT:009705	Oleoyl-[acyl-carrier-protein] hydrolase activity	GO_molecular_function	GO:0004320	EXONT:000001,EXONT:000002,EXONT:001893,EXONT:001904,EXONT:001957,EXONT:002032,EXONT:002033,EXONT:003813,EXONT:009233,EXONT:009700
EXONT:009706	Myristoyl-[acyl-carrier-protein] hydrolase activity	GO_molecular_function	GO:0016295	EXONT:000001,EXONT:000002,EXONT:001893,EXONT:001904,EXONT:001957,EXONT:002032,EXONT:002033,EXONT:003813,EXONT:009233,EXONT:009700
EXONT:009707	Palmitoyl-[acyl-carrier-protein] hydrolase activity	GO_molecular_function	GO:0016296	EXONT:000001,EXONT:000002,EXONT:001893,EXONT:001904,EXONT:001957,EXONT:002032,EXONT:002033,EXONT:003813,EXONT:009233,EXONT:009700
EXONT:009708	S-acetyltransferase activity	GO_molecular_function	GO:0016418	EXONT:000001,EXONT:000002,EXONT:001904,EXONT:002032,EXONT:002033,EXONT:002034,EXONT:009709
EXONT:009709	S-acyltransferase activity	GO_molecular_function	GO:0016417	EXONT:000001,EXONT:000002,EXONT:001904,EXONT:002032,EXONT:002033
EXONT:009710	S-malonyltransferase activity	GO_molecular_function	GO:0016419	EXONT:000001,EXONT:000002,EXONT:001904,EXONT:002032,EXONT:002033,EXONT:009709,EXONT:009711
EXONT:009711	Malonyltransferase activity	GO_molecular_function	GO:0016420	EXONT:000001,EXONT:000002,EXONT:001904,EXONT:002032,EXONT:002033
EXONT:009738	Protein N-terminal glutamine amidohydrolase, alpha beta roll	IPR_Domain	IPR023128	EXONT:000001,EXONT:000002,EXONT:001893,EXONT:002000,EXONT:003246
EXONT:009752	Microtubule-associated serine/threonine-protein kinase, pre-PK domain	IPR_Domain	IPR023142	EXONT:000001,EXONT:000002,EXONT:001904,EXONT:001905,EXONT:001906,EXONT:001910,EXONT:002248,EXONT:002249
EXONT:009772	Ribonuclease HII, helix-loop-helix cap domain	IPR_Domain	IPR023160	EXONT:000001,EXONT:000002,EXONT:001893,EXONT:001957,EXONT:002081,EXONT:002082,EXONT:002562,EXONT:002565,EXONT:002566,EXONT:002567,EXONT:002832
EXONT:009784	NADPH-cytochrome p450 reductase, FAD-binding, alpha-helical domain-3	IPR_Domain	IPR023173	EXONT:000001,EXONT:000002,EXONT:001912
EXONT:009785	3'5'-cyclic nucleotide phosphodiesterase, conserved site	IPR_Site	IPR023174	EXONT:000001,EXONT:000002,EXONT:001893,EXONT:001957,EXONT:002093,EXONT:002886
EXONT:009800	Phosphoserine phosphatase activity	GO_molecular_function	GO:0004647	EXONT:000001,EXONT:000002,EXONT:001893,EXONT:001957,EXONT:002093,EXONT:002094
EXONT:009801	Phosphoserine phosphatase, domain 2	IPR_Domain	IPR023190	EXONT:000001,EXONT:000002,EXONT:001893,EXONT:001957,EXONT:002093,EXONT:002094,EXONT:009800
EXONT:009833	Glycoside hydrolase, family 2, active site	IPR_Site	IPR023232	EXONT:000001,EXONT:000002,EXONT:000011,EXONT:000018
EXONT:009840	Hydroxymethylglutaryl-CoA reductase, N-terminal	IPR_Domain	IPR023282	EXONT:000001,EXONT:000002,EXONT:001912,EXONT:002015,EXONT:002266,EXONT:009678
EXONT:009853	Peptidase S9A, N-terminal domain	IPR_Domain	IPR023302	EXONT:000001,EXONT:000002,EXONT:001893,EXONT:001894,EXONT:001897,EXONT:001899,EXONT:001980,EXONT:001981,EXONT:002026,EXONT:002074,EXONT:002876
EXONT:009861	Ubiquitin-conjugating enzyme, active site	IPR_Site	IPR023313	EXONT:000001,EXONT:000002,EXONT:000011,EXONT:000018
EXONT:009865	Ubiquitin activating enzyme, alpha domain	IPR_Domain	IPR023318	EXONT:000001,EXONT:000002,EXONT:001902,EXONT:002342,EXONT:002343
EXONT:009895	Peptidase M18, domain 2	IPR_Domain	IPR023358	EXONT:000001,EXONT:000002,EXONT:001893,EXONT:001894,EXONT:001897,EXONT:002026,EXONT:002028
EXONT:009929	S-adenosyl-L-methionine-dependent methyltransferase, MraW, recognition domain	IPR_Domain	IPR023397	EXONT:000001,EXONT:000002,EXONT:001904,EXONT:002438,EXONT:002439
EXONT:009936	Radical SAM, alpha/beta horseshoe	IPR_Domain	IPR023404	EXONT:000001,EXONT:000002,EXONT:000005,EXONT:002205,EXONT:002206,EXONT:004690,EXONT:004691
EXONT:009938	DNA topoisomerase, type IA, active site	IPR_Site	IPR023406	EXONT:000001,EXONT:000002,EXONT:000018,EXONT:002139,EXONT:003176,EXONT:005276
EXONT:009942	Ribonuclease A, active site	IPR_Site	IPR023411	EXONT:000001,EXONT:000002,EXONT:000011,EXONT:000018
EXONT:009950	Tyrosine-protein kinase SYK/ZAP-70, inter-SH2 domain	IPR_Domain	IPR023420	EXONT:000001,EXONT:000002,EXONT:001904,EXONT:001905,EXONT:001906,EXONT:001910,EXONT:002248,EXONT:002808,EXONT:007315
EXONT:009973	UbiE/COQ5 methyltransferase, conserved site	IPR_Site	IPR023576	EXONT:000001,EXONT:000002,EXONT:001904,EXONT:002438,EXONT:002439
EXONT:010001	Urocanate hydratase activity	GO_molecular_function	GO:0016153	EXONT:000001,EXONT:000002,EXONT:002003,EXONT:002078,EXONT:002616
EXONT:010002	Urocanase conserved site	IPR_Site	IPR023636	EXONT:000001,EXONT:000002,EXONT:002003,EXONT:002078,EXONT:002616,EXONT:010001
EXONT:010009	RbsD-like domain	IPR_Domain	IPR023750	EXONT:000001,EXONT:000002,EXONT:000005,EXONT:002116,EXONT:002139,EXONT:004675
EXONT:010010	Pyridine nucleotide-disulphide oxidoreductase, FAD/NAD(P)-binding domain	IPR_Domain	IPR023753	EXONT:000001,EXONT:000002,EXONT:001912
EXONT:010016	RNA 3'-terminal phosphate cyclase domain	IPR_Domain	IPR023797	EXONT:000001,EXONT:000002,EXONT:003070
EXONT:010025	Peptidase S8, subtilisin, Asp-active site	IPR_Site	IPR023827	EXONT:000001,EXONT:000002,EXONT:000011,EXONT:000018
EXONT:010026	Peptidase S8, subtilisin, Ser-active site	IPR_Site	IPR023828	EXONT:000001,EXONT:000002,EXONT:000011,EXONT:000018
EXONT:010039	ATPase, F1 complex beta subunit/V1 complex, C-terminal	IPR_Domain	IPR024034	EXONT:000001,EXONT:000002,EXONT:000004,EXONT:001893,EXONT:001943,EXONT:002384,EXONT:002447,EXONT:002448
EXONT:010074	Argininosuccinate synthetase, catalytic/multimerisation domain body	IPR_Domain	IPR024074	EXONT:000001,EXONT:000002,EXONT:001902,EXONT:002342,EXONT:008201
EXONT:010075	DNA-directed RNA polymerase, helix hairpin domain	IPR_Domain	IPR024075	EXONT:000001,EXONT:000002,EXONT:001904,EXONT:001905,EXONT:002067,EXONT:002072,EXONT:002408
EXONT:010079	Metallopeptidase, catalytic domain	IPR_Domain	IPR024079	EXONT:000001,EXONT:000002,EXONT:001893,EXONT:001894,EXONT:001897,EXONT:002024
EXONT:010082	Isopropylmalate dehydrogenase-like domain	IPR_Domain	IPR024084	EXONT:000001,EXONT:000002,EXONT:001912,EXONT:002015,EXONT:002266
EXONT:010091	Bin3-type S-adenosyl-L-methionine binding domain	IPR_Domain	IPR024160	EXONT:000001,EXONT:000002,EXONT:001904,EXONT:002438,EXONT:002439
EXONT:010093	Mst1 SARAH domain	IPR_Domain	IPR024205	EXONT:000001,EXONT:000002,EXONT:000011,EXONT:001904,EXONT:001905,EXONT:001906,EXONT:001910,EXONT:002248,EXONT:002249,EXONT:006075
EXONT:010305	Serine/threonine-protein kinase OSR1/WNK, CCT domain	IPR_Domain	IPR024678	EXONT:000001,EXONT:000002,EXONT:000005,EXONT:001904,EXONT:001905,EXONT:001906,EXONT:001910,EXONT:001928,EXONT:001932,EXONT:001937,EXONT:001984,EXONT:001985,EXONT:001986,EXONT:001987,EXONT:001988,EXONT:001989,EXONT:001990,EXONT:001991,EXONT:001992,EXONT:001993,EXONT:001994,EXONT:001995,EXONT:001996,EXONT:001997,EXONT:001998,EXONT:001999,EXONT:002248,EXONT:002249
EXONT:010315	Catalase active site	IPR_Site	IPR024708	EXONT:000001,EXONT:000002,EXONT:000018,EXONT:001912,EXONT:001913,EXONT:001914,EXONT:006105
EXONT:010377	Sulphate adenylyltransferase catalytic domain	IPR_Domain	IPR024951	EXONT:000001,EXONT:000002,EXONT:000011,EXONT:001904,EXONT:001905,EXONT:002067,EXONT:003060,EXONT:003321,EXONT:003322,EXONT:003323
EXONT:010380	TRNAHis guanylyltransferase catalytic domain	IPR_Domain	IPR024956	EXONT:000001,EXONT:000002,EXONT:000005,EXONT:001904,EXONT:001905,EXONT:001937,EXONT:001938,EXONT:001939,EXONT:001946,EXONT:002067,EXONT:002757,EXONT:002758,EXONT:010381
EXONT:010381	TRNA guanylyltransferase activity	GO_molecular_function	GO:0008193	EXONT:000001,EXONT:000002,EXONT:001904,EXONT:001905,EXONT:002067,EXONT:002757,EXONT:002758
EXONT:010671	Cysteine peptidase, histidine active site	IPR_Site	IPR025660	EXONT:000001,EXONT:000002,EXONT:000011,EXONT:000018
EXONT:010672	Cysteine peptidase, asparagine active site	IPR_Site	IPR025661	EXONT:000001,EXONT:000002,EXONT:000011,EXONT:000018
EXONT:010694	Leucyl-tRNA synthetase, editing domain	IPR_Domain	IPR025709	EXONT:000001,EXONT:000002,EXONT:001893,EXONT:001957,EXONT:001958,EXONT:004943,EXONT:005432
EXONT:010728	Fetuin-A-type cystatin domain	IPR_Domain	IPR025760	EXONT:000001,EXONT:000002,EXONT:001887,EXONT:001888,EXONT:001889,EXONT:001890,EXONT:001891,EXONT:001892,EXONT:001893,EXONT:001894,EXONT:001895,EXONT:001896,EXONT:001897,EXONT:001898,EXONT:001899
EXONT:010731	Fetuin-B-type cystatin domain	IPR_Domain	IPR025764	EXONT:000001,EXONT:000002,EXONT:001887,EXONT:001888,EXONT:001889,EXONT:001890,EXONT:001891,EXONT:001892,EXONT:001893,EXONT:001894,EXONT:001895,EXONT:001896,EXONT:001897,EXONT:001898,EXONT:001899
EXONT:010736	GMP synthetase ATP pyrophosphatase domain	IPR_Domain	IPR025777	EXONT:000001,EXONT:000002,EXONT:000005,EXONT:000011,EXONT:001893,EXONT:001928,EXONT:001932,EXONT:001937,EXONT:001943,EXONT:001944,EXONT:001984,EXONT:001985,EXONT:001986,EXONT:001987,EXONT:001988,EXONT:001989,EXONT:001990,EXONT:001991,EXONT:001992,EXONT:001993,EXONT:001994,EXONT:001995,EXONT:001996,EXONT:001997,EXONT:001998,EXONT:001999,EXONT:002054,EXONT:003060,EXONT:009465
EXONT:010780	Glycoside hydrolase family 31, N-terminal domain	IPR_Domain	IPR025887	EXONT:000001,EXONT:000002,EXONT:000005,EXONT:002116,EXONT:003530
EXONT:010969	Kininogen-type cystatin domain	IPR_Domain	IPR027358	EXONT:000001,EXONT:000002,EXONT:001887,EXONT:001888,EXONT:001889,EXONT:001890,EXONT:001891,EXONT:001892,EXONT:001893,EXONT:001894,EXONT:001895,EXONT:001896,EXONT:001897,EXONT:001898,EXONT:001899
EXONT:011057	Asparaginase/glutaminase, active site 2	IPR_Site	IPR027475	EXONT:000001,EXONT:000002,EXONT:000011,EXONT:000018
EXONT:011245	Reductase, C-terminal	IPR_Domain	IPR028202	EXONT:000001,EXONT:000002,EXONT:000005,EXONT:001912,EXONT:001928,EXONT:001932,EXONT:001937,EXONT:001984,EXONT:001987,EXONT:001988,EXONT:001997,EXONT:002017,EXONT:002018,EXONT:002019,EXONT:003869
EXONT:011250	Transcription elongation factor SPT6, YqgF domain	IPR_Domain	IPR028231	EXONT:000001,EXONT:000002,EXONT:001893,EXONT:001957,EXONT:004693
EXONT:011276	Ubiquitin-specific peptidase-like, SUMO isopeptidase	IPR_Domain	IPR028890	EXONT:000001,EXONT:000002,EXONT:000005,EXONT:000011,EXONT:001885,EXONT:001893,EXONT:001894,EXONT:001897,EXONT:001898,EXONT:002793,EXONT:002903,EXONT:004899,EXONT:011277,EXONT:011278,EXONT:011279,EXONT:011280,EXONT:011281
EXONT:011278	Isopeptidase activity	GO_molecular_function	GO:0070122	EXONT:000001,EXONT:000002,EXONT:001893,EXONT:001894
EXONT:011279	Small conjugating protein-specific isopeptidase activity	GO_molecular_function	GO:0070138	EXONT:000001,EXONT:000002,EXONT:001893,EXONT:001894,EXONT:001897,EXONT:001898,EXONT:002903,EXONT:011278
EXONT:011280	SUMO-specific isopeptidase activity	GO_molecular_function	GO:0070140	EXONT:000001,EXONT:000002,EXONT:001893,EXONT:001894,EXONT:001897,EXONT:001898,EXONT:002903,EXONT:011278,EXONT:011279,EXONT:011281
EXONT:011281	SUMO-specific protease activity	GO_molecular_function	GO:0016929	EXONT:000001,EXONT:000002,EXONT:001893,EXONT:001894,EXONT:001897,EXONT:001898,EXONT:002903

## Sheet: Receptor
EO identifier	Eo name	External database	External identifier	EO ancestors
EXONT:000003	Receptor activity	GO	GO:0004872	EXONT:000001
EXONT:000012	Signal transducer activity	GO	GO:0004871	EXONT:000001,EXONT:000003
EXONT:001900	PAS domain	IPR_Domain	IPR000014	EXONT:000001,EXONT:000003,EXONT:000012
EXONT:002242	Signaling receptor activity	GO_molecular_function	GO:0038023	EXONT:000001,EXONT:000003,EXONT:000012
EXONT:002243	Transmembrane signaling receptor activity	GO_molecular_function	GO:0004888	EXONT:000001,EXONT:000003,EXONT:000012,EXONT:002242
EXONT:002244	Transmembrane receptor protein kinase activity	GO_molecular_function	GO:0019199	EXONT:000001,EXONT:000002,EXONT:000003,EXONT:000012,EXONT:001904,EXONT:001905,EXONT:001906,EXONT:001910,EXONT:002242,EXONT:002243,EXONT:002248
EXONT:002245	Transmembrane receptor protein serine/threonine kinase activity	GO_molecular_function	GO:0004675	EXONT:000001,EXONT:000002,EXONT:000003,EXONT:000012,EXONT:001904,EXONT:001905,EXONT:001906,EXONT:001910,EXONT:002242,EXONT:002243,EXONT:002244,EXONT:002248,EXONT:002249
EXONT:002246	TGF-beta receptor/activin receptor, type I/II	IPR_Domain	IPR000472	EXONT:000001,EXONT:000002,EXONT:000003,EXONT:000012,EXONT:001904,EXONT:001905,EXONT:001906,EXONT:001910,EXONT:002242,EXONT:002243,EXONT:002244,EXONT:002245,EXONT:002247,EXONT:002248,EXONT:002249
EXONT:002247	Transforming growth factor beta-activated receptor activity	GO_molecular_function	GO:0005024	EXONT:000001,EXONT:000002,EXONT:000003,EXONT:000012,EXONT:001904,EXONT:001905,EXONT:001906,EXONT:001910,EXONT:002242,EXONT:002243,EXONT:002244,EXONT:002245,EXONT:002248,EXONT:002249
EXONT:002285	Nuclear hormone receptor, ligand-binding, core	IPR_Domain	IPR000536	EXONT:000001,EXONT:000003,EXONT:000005,EXONT:000012,EXONT:000014,EXONT:002242,EXONT:002286
EXONT:002286	Steroid hormone receptor activity	GO_molecular_function	GO:0003707	EXONT:000001,EXONT:000003,EXONT:000012,EXONT:002242
EXONT:002370	Receptor signaling protein activity	GO_molecular_function	GO:0005057	EXONT:000001,EXONT:000003,EXONT:000012
EXONT:002399	Phosphorelay sensor kinase activity	GO_molecular_function	GO:0000155	EXONT:000001,EXONT:000002,EXONT:000003,EXONT:000012,EXONT:001904,EXONT:001905,EXONT:001906,EXONT:001910,EXONT:002242,EXONT:002248,EXONT:002401,EXONT:002402
EXONT:002400	PAS-associated, C-terminal	IPR_Domain	IPR000700	EXONT:000001,EXONT:000002,EXONT:000003,EXONT:000012,EXONT:001904,EXONT:001905,EXONT:001906,EXONT:001910,EXONT:002242,EXONT:002248,EXONT:002399,EXONT:002401,EXONT:002402
EXONT:002484	GPCR, family 2-like	IPR_Domain	IPR017981	EXONT:000001,EXONT:000003,EXONT:000012,EXONT:002242,EXONT:002243
EXONT:002485	GPCR, cAMP-type	IPR_Domain	IPR000848	EXONT:000001,EXONT:000003,EXONT:000005,EXONT:000012,EXONT:001928,EXONT:001932,EXONT:001937,EXONT:001984,EXONT:001987,EXONT:001988,EXONT:001992,EXONT:001994,EXONT:001995,EXONT:001996,EXONT:001997,EXONT:001998,EXONT:001999,EXONT:002242,EXONT:002243,EXONT:002484,EXONT:002486,EXONT:002487,EXONT:002488
EXONT:002486	G-protein coupled receptor activity	GO_molecular_function	GO:0004930	EXONT:000001,EXONT:000003,EXONT:000012,EXONT:002242,EXONT:002243
EXONT:002673	SRCR domain	IPR_Domain	IPR001190	EXONT:000001,EXONT:000003,EXONT:000011,EXONT:002672,EXONT:002674,EXONT:002675
EXONT:002674	Cargo receptor activity	GO_molecular_function	GO:0038024	EXONT:000001,EXONT:000003
EXONT:002675	Scavenger receptor activity	GO_molecular_function	GO:0005044	EXONT:000001,EXONT:000003,EXONT:002674
EXONT:002686	Somatomedin B domain	IPR_Domain	IPR001212	EXONT:000001,EXONT:000003,EXONT:000005,EXONT:002113,EXONT:002114,EXONT:002116,EXONT:002674,EXONT:002675
EXONT:002743	Glutamate receptor activity	GO_molecular_function	GO:0008066	EXONT:000001,EXONT:000003,EXONT:000012,EXONT:002242,EXONT:002243
EXONT:002744	Ionotropic glutamate receptor activity	GO_molecular_function	GO:0004970	EXONT:000001,EXONT:000003,EXONT:000004,EXONT:000012,EXONT:002242,EXONT:002243,EXONT:002363,EXONT:002384,EXONT:002385,EXONT:002386,EXONT:002387,EXONT:002391,EXONT:002393,EXONT:002394,EXONT:002743,EXONT:002746,EXONT:002747,EXONT:002748,EXONT:002749
EXONT:002745	Ionotropic glutamate receptor	IPR_Domain	IPR001320	EXONT:000001,EXONT:000003,EXONT:000004,EXONT:000012,EXONT:002242,EXONT:002243,EXONT:002363,EXONT:002384,EXONT:002385,EXONT:002386,EXONT:002387,EXONT:002391,EXONT:002393,EXONT:002394,EXONT:002743,EXONT:002744,EXONT:002746,EXONT:002747,EXONT:002748,EXONT:002749,EXONT:002750,EXONT:002751
EXONT:002805	Tyrosine-protein kinase, receptor class V, conserved site	IPR_Site	IPR001426	EXONT:000001,EXONT:000002,EXONT:000003,EXONT:000005,EXONT:000012,EXONT:001904,EXONT:001905,EXONT:001906,EXONT:001910,EXONT:001928,EXONT:001932,EXONT:001937,EXONT:001984,EXONT:001985,EXONT:001986,EXONT:001987,EXONT:001988,EXONT:001989,EXONT:001990,EXONT:001991,EXONT:001992,EXONT:001993,EXONT:001994,EXONT:001995,EXONT:001996,EXONT:001997,EXONT:001998,EXONT:001999,EXONT:002242,EXONT:002243,EXONT:002…
EXONT:002806	Transmembrane receptor protein tyrosine kinase activity	GO_molecular_function	GO:0004714	EXONT:000001,EXONT:000002,EXONT:000003,EXONT:000012,EXONT:001904,EXONT:001905,EXONT:001906,EXONT:001910,EXONT:002242,EXONT:002243,EXONT:002244,EXONT:002248,EXONT:002808
EXONT:002807	Ephrin receptor activity	GO_molecular_function	GO:0005003	EXONT:000001,EXONT:000002,EXONT:000003,EXONT:000012,EXONT:001904,EXONT:001905,EXONT:001906,EXONT:001910,EXONT:002242,EXONT:002243,EXONT:002244,EXONT:002248,EXONT:002806,EXONT:002808
EXONT:003009	Tyrosine-protein kinase, receptor class III, conserved site	IPR_Site	IPR001824	EXONT:000001,EXONT:000002,EXONT:000003,EXONT:000005,EXONT:000012,EXONT:001904,EXONT:001905,EXONT:001906,EXONT:001910,EXONT:001928,EXONT:001932,EXONT:001937,EXONT:001984,EXONT:001985,EXONT:001986,EXONT:001987,EXONT:001988,EXONT:001989,EXONT:001990,EXONT:001991,EXONT:001992,EXONT:001993,EXONT:001994,EXONT:001995,EXONT:001996,EXONT:001997,EXONT:001998,EXONT:001999,EXONT:002242,EXONT:002243,EXONT:002…
EXONT:003031	GPCR, family 2, extracellular hormone receptor domain	IPR_Domain	IPR001879	EXONT:000001,EXONT:000003,EXONT:000012,EXONT:002242,EXONT:002243,EXONT:002486
EXONT:003084	Tyrosine-protein kinase, receptor class II, conserved site	IPR_Site	IPR002011	EXONT:000001,EXONT:000002,EXONT:000003,EXONT:000005,EXONT:000012,EXONT:001904,EXONT:001905,EXONT:001906,EXONT:001910,EXONT:001928,EXONT:001932,EXONT:001937,EXONT:001984,EXONT:001985,EXONT:001986,EXONT:001987,EXONT:001988,EXONT:001989,EXONT:001990,EXONT:001991,EXONT:001992,EXONT:001993,EXONT:001994,EXONT:001995,EXONT:001996,EXONT:001997,EXONT:001998,EXONT:001999,EXONT:002242,EXONT:002243,EXONT:002…
EXONT:003479	Phosphorylated immunoreceptor signalling ITAM	IPR_Repeat	IPR003110	EXONT:000001,EXONT:000003,EXONT:000007,EXONT:000012,EXONT:000025,EXONT:000027,EXONT:002242,EXONT:002243
EXONT:003486	Raf-like Ras-binding	IPR_Domain	IPR003116	EXONT:000001,EXONT:000003,EXONT:000012,EXONT:002370
EXONT:003526	Adaptor protein Cbl, N-terminal helical	IPR_Domain	IPR003153	EXONT:000001,EXONT:000003,EXONT:000012
EXONT:003582	GPCR, family 2, latrophilin, C-terminal	IPR_Domain	IPR003334	EXONT:000001,EXONT:000003,EXONT:000012,EXONT:002242,EXONT:002243,EXONT:002486
EXONT:003654	Receptor signaling protein serine/threonine kinase activity	GO_molecular_function	GO:0004702	EXONT:000001,EXONT:000002,EXONT:000003,EXONT:000012,EXONT:001904,EXONT:001905,EXONT:001906,EXONT:001910,EXONT:002248,EXONT:002249,EXONT:002370
EXONT:003655	MAP kinase activity	GO_molecular_function	GO:0004707	EXONT:000001,EXONT:000002,EXONT:000003,EXONT:000012,EXONT:001904,EXONT:001905,EXONT:001906,EXONT:001910,EXONT:002248,EXONT:002249,EXONT:002370,EXONT:003654
EXONT:003656	Mitogen-activated protein (MAP) kinase, conserved site	IPR_Site	IPR003527	EXONT:000001,EXONT:000002,EXONT:000003,EXONT:000005,EXONT:000012,EXONT:001904,EXONT:001905,EXONT:001906,EXONT:001910,EXONT:001928,EXONT:001932,EXONT:001937,EXONT:001984,EXONT:001985,EXONT:001986,EXONT:001987,EXONT:001988,EXONT:001989,EXONT:001990,EXONT:001991,EXONT:001992,EXONT:001993,EXONT:001994,EXONT:001995,EXONT:001996,EXONT:001997,EXONT:001998,EXONT:001999,EXONT:002248,EXONT:002249,EXONT:002…
EXONT:003657	Cytokine receptor activity	GO_molecular_function	GO:0004896	EXONT:000001,EXONT:000003,EXONT:000012,EXONT:002242,EXONT:002243
EXONT:003658	Long hematopoietin receptor, single chain, conserved site	IPR_Site	IPR003528	EXONT:000001,EXONT:000003,EXONT:000012,EXONT:002242,EXONT:002243,EXONT:003657
EXONT:003659	Long hematopoietin receptor, Gp130 family 2, conserved site	IPR_Site	IPR003529	EXONT:000001,EXONT:000003,EXONT:000012,EXONT:002242,EXONT:002243,EXONT:003657
EXONT:003660	Long hematopoietin receptor, soluble alpha chain, conserved site	IPR_Site	IPR003530	EXONT:000001,EXONT:000003,EXONT:000012,EXONT:002242,EXONT:002243,EXONT:003657
EXONT:003661	Short hematopoietin receptor, family 1, conserved site	IPR_Site	IPR003531	EXONT:000001,EXONT:000003,EXONT:000012,EXONT:002242,EXONT:002243,EXONT:003657
EXONT:003662	Short hematopoietin receptor, family 2, conserved site	IPR_Site	IPR003532	EXONT:000001,EXONT:000003,EXONT:000012,EXONT:002242,EXONT:002243,EXONT:003657
EXONT:003666	Macrophage scavenger receptor	IPR_Domain	IPR003543	EXONT:000001,EXONT:000003,EXONT:002674,EXONT:002675
EXONT:003684	TGF beta receptor, GS motif	IPR_Domain	IPR003605	EXONT:000001,EXONT:000002,EXONT:000003,EXONT:000005,EXONT:000012,EXONT:001904,EXONT:001905,EXONT:001906,EXONT:001910,EXONT:001928,EXONT:001932,EXONT:001937,EXONT:001984,EXONT:001985,EXONT:001986,EXONT:001987,EXONT:001988,EXONT:001989,EXONT:001990,EXONT:001991,EXONT:001992,EXONT:001993,EXONT:001994,EXONT:001995,EXONT:001996,EXONT:001997,EXONT:001998,EXONT:001999,EXONT:002242,EXONT:002243,EXONT:002…
EXONT:003719	Signal transduction histidine kinase, homodimeric domain	IPR_Domain	IPR009082	EXONT:000001,EXONT:000003,EXONT:000012
EXONT:003720	Signal transduction histidine kinase EnvZ-like, dimerisation/phosphoacceptor domain	IPR_Domain	IPR003661	EXONT:000001,EXONT:000002,EXONT:000003,EXONT:000012,EXONT:001904,EXONT:001905,EXONT:001906,EXONT:001910,EXONT:002242,EXONT:002248,EXONT:002399,EXONT:002401,EXONT:002402,EXONT:003719
EXONT:004244	Focal adhesion kinase, targeting (FAT) domain	IPR_Domain	IPR005189	EXONT:000001,EXONT:000002,EXONT:000003,EXONT:000012,EXONT:001904,EXONT:001905,EXONT:001906,EXONT:001910,EXONT:002248,EXONT:002808
EXONT:004549	Furin-like cysteine-rich domain	IPR_Domain	IPR006211	EXONT:000001,EXONT:000002,EXONT:000003,EXONT:000005,EXONT:000011,EXONT:000012,EXONT:001904,EXONT:001905,EXONT:001906,EXONT:001910,EXONT:001928,EXONT:001932,EXONT:001937,EXONT:001984,EXONT:001985,EXONT:001986,EXONT:001987,EXONT:001988,EXONT:001989,EXONT:001990,EXONT:001991,EXONT:001992,EXONT:001993,EXONT:001994,EXONT:001995,EXONT:001996,EXONT:001997,EXONT:001998,EXONT:001999,EXONT:002242,EXONT:002…
EXONT:004746	Opioid growth factor receptor (OGFr) conserved domain	IPR_Domain	IPR006757	EXONT:000001,EXONT:000003
EXONT:005282	Anthrax toxin receptor, C-terminal	IPR_Domain	IPR008399	EXONT:000001,EXONT:000003
EXONT:005283	Anthrax toxin receptor, extracellular	IPR_Domain	IPR008400	EXONT:000001,EXONT:000003
EXONT:005400	Nuclear hormone receptor, ligand-binding	IPR_Domain	IPR008946	EXONT:000001,EXONT:000003,EXONT:000005,EXONT:000012,EXONT:000014,EXONT:002242,EXONT:002286
EXONT:005486	TRADD, N-terminal	IPR_Domain	IPR009095	EXONT:000001,EXONT:000003,EXONT:000005,EXONT:000012,EXONT:001885
EXONT:005676	Signaling lymphocytic activation molecule, N-terminal	IPR_Domain	IPR010407	EXONT:000001,EXONT:000003
EXONT:005907	G protein alpha subunit, helical insertion	IPR_Domain	IPR011025	EXONT:000001,EXONT:000003,EXONT:000012
EXONT:006057	GPCR, family 3, nine cysteines domain	IPR_Domain	IPR011500	EXONT:000001,EXONT:000003,EXONT:000012,EXONT:002242,EXONT:002243,EXONT:002486
EXONT:006278	STAT transcription factor, DNA-binding, subdomain	IPR_Domain	IPR012345	EXONT:000001,EXONT:000003,EXONT:000005,EXONT:000012,EXONT:000014
EXONT:006834	PAS fold-3	IPR_Domain	IPR013655	EXONT:000001,EXONT:000003,EXONT:000005,EXONT:000012,EXONT:001885,EXONT:001900
EXONT:006942	PAS fold	IPR_Domain	IPR013767	EXONT:000001,EXONT:000003,EXONT:000012,EXONT:001900
EXONT:006954	STAT transcription factor, protein interaction	IPR_Domain	IPR013799	EXONT:000001,EXONT:000003,EXONT:000005,EXONT:000012,EXONT:000014
EXONT:006955	STAT transcription factor, all-alpha	IPR_Domain	IPR013800	EXONT:000001,EXONT:000003,EXONT:000005,EXONT:000012,EXONT:000014,EXONT:006956
EXONT:006956	STAT transcription factor, coiled coil	IPR_Domain	IPR015988	EXONT:000001,EXONT:000003,EXONT:000005,EXONT:000012,EXONT:000014
EXONT:006957	STAT transcription factor, DNA-binding	IPR_Domain	IPR013801	EXONT:000001,EXONT:000003,EXONT:000005,EXONT:000012,EXONT:000014,EXONT:005415
EXONT:007310	Phenylalanine zipper	IPR_Domain	IPR015012	EXONT:000001,EXONT:000003,EXONT:000012
EXONT:007311	Transforming growth factor beta receptor 2 ectodomain	IPR_Domain	IPR015013	EXONT:000001,EXONT:000002,EXONT:000003,EXONT:000005,EXONT:000012,EXONT:001904,EXONT:001905,EXONT:001906,EXONT:001910,EXONT:001928,EXONT:001932,EXONT:001937,EXONT:001938,EXONT:001939,EXONT:001984,EXONT:001985,EXONT:001986,EXONT:001987,EXONT:001988,EXONT:001989,EXONT:001990,EXONT:001991,EXONT:001992,EXONT:001993,EXONT:001994,EXONT:001995,EXONT:001996,EXONT:001997,EXONT:001998,EXONT:001999,EXONT:002…
EXONT:007312	Transforming growth factor beta receptor activity, type II	GO_molecular_function	GO:0005026	EXONT:000001,EXONT:000002,EXONT:000003,EXONT:000012,EXONT:001904,EXONT:001905,EXONT:001906,EXONT:001910,EXONT:002242,EXONT:002243,EXONT:002244,EXONT:002245,EXONT:002247,EXONT:002248,EXONT:002249
EXONT:007397	Thrombomodulin-like, EGF-like	IPR_Domain	IPR015149	EXONT:000001,EXONT:000003,EXONT:000012,EXONT:002242,EXONT:002243
EXONT:007528	Interleukin-4 receptor alpha, N-terminal	IPR_Domain	IPR015319	EXONT:000001,EXONT:000003,EXONT:000012,EXONT:002242,EXONT:002243,EXONT:003657
EXONT:007716	G-protein gamma-like domain	IPR_Domain	IPR015898	EXONT:000001,EXONT:000003,EXONT:000012
EXONT:007890	Plexin-like fold	IPR_Repeat	IPR016201	EXONT:000001,EXONT:000003,EXONT:000007,EXONT:000025,EXONT:000027
EXONT:008036	GPCR, family 3, C-terminal	IPR_Domain	IPR017978	EXONT:000001,EXONT:000003,EXONT:000012,EXONT:002242,EXONT:002243,EXONT:002486
EXONT:008037	GPCR, family 3, conserved site	IPR_Site	IPR017979	EXONT:000001,EXONT:000003,EXONT:000012,EXONT:002242,EXONT:002243,EXONT:002486
EXONT:008038	GPCR, family 2, secretin-like, conserved site	IPR_Site	IPR017983	EXONT:000001,EXONT:000003,EXONT:000012,EXONT:002242,EXONT:002243,EXONT:002486
EXONT:008522	Tyrosine-protein kinase, receptor Tie-2, Ig-like domain 1, N-terminal	IPR_Domain	IPR018941	EXONT:000001,EXONT:000002,EXONT:000003,EXONT:000005,EXONT:000012,EXONT:001904,EXONT:001905,EXONT:001906,EXONT:001910,EXONT:001928,EXONT:001932,EXONT:001937,EXONT:001984,EXONT:001985,EXONT:001986,EXONT:001987,EXONT:001988,EXONT:001989,EXONT:001990,EXONT:001991,EXONT:001992,EXONT:001993,EXONT:001994,EXONT:001995,EXONT:001996,EXONT:001997,EXONT:001998,EXONT:001999,EXONT:002242,EXONT:002243,EXONT:002…
EXONT:008770	Glutamate receptor, L-glutamate/glycine-binding	IPR_Domain	IPR019594	EXONT:000001,EXONT:000003,EXONT:000004,EXONT:000012,EXONT:002242,EXONT:002243,EXONT:002363,EXONT:002384,EXONT:002385,EXONT:002386,EXONT:002387,EXONT:002391,EXONT:002393,EXONT:002394,EXONT:002743,EXONT:002744,EXONT:002746,EXONT:002747,EXONT:002748,EXONT:002749,EXONT:002750,EXONT:002751
EXONT:008971	Somatomedin B, chordata	IPR_Domain	IPR020436	EXONT:000001,EXONT:000003,EXONT:000005,EXONT:002113,EXONT:002114,EXONT:002116,EXONT:002674,EXONT:002675,EXONT:002686

## Sheet: Transporter
EO identifier	Eo name	External database	External identifier	EO ancestors
EXONT:000004	Transporter activity	GO	GO:0005215	EXONT:000001
EXONT:000013	Electron carrier activity	GO	GO:0009055	EXONT:000001,EXONT:000004
EXONT:001934	Electron transfer flavoprotein, beta-subunit, conserved site	IPR_Site	IPR000049	EXONT:000001,EXONT:000004,EXONT:000013
EXONT:002235	Cytosolic fatty-acid binding	IPR_Domain	IPR000463	EXONT:000001,EXONT:000004,EXONT:000005,EXONT:000011,EXONT:002236,EXONT:002237,EXONT:002238,EXONT:002239
EXONT:002251	Cation-independent mannose-6-phosphate receptor	IPR_Repeat	IPR000479	EXONT:000001,EXONT:000004,EXONT:000007,EXONT:000025,EXONT:000027
EXONT:002305	Oxidoreductase, molybdopterin-binding domain	IPR_Domain	IPR000572	EXONT:000001,EXONT:000004,EXONT:000013
EXONT:002363	Substrate-specific transporter activity	GO_molecular_function	GO:0022892	EXONT:000001,EXONT:000004
EXONT:002364	Protein transporter activity	GO_molecular_function	GO:0008565	EXONT:000001,EXONT:000004,EXONT:002363
EXONT:002384	Transmembrane transporter activity	GO_molecular_function	GO:0022857	EXONT:000001,EXONT:000004
EXONT:002385	Substrate-specific transmembrane transporter activity	GO_molecular_function	GO:0022891	EXONT:000001,EXONT:000004,EXONT:002363,EXONT:002384
EXONT:002386	Ion transmembrane transporter activity	GO_molecular_function	GO:0015075	EXONT:000001,EXONT:000004,EXONT:002363,EXONT:002384,EXONT:002385
EXONT:002387	Ion channel activity	GO_molecular_function	GO:0005216	EXONT:000001,EXONT:000004,EXONT:002363,EXONT:002384,EXONT:002385,EXONT:002386,EXONT:002391,EXONT:002393,EXONT:002394
EXONT:002388	Cation channel activity	GO_molecular_function	GO:0005261	EXONT:000001,EXONT:000004,EXONT:002363,EXONT:002384,EXONT:002385,EXONT:002386,EXONT:002387,EXONT:002391,EXONT:002392,EXONT:002393,EXONT:002394
EXONT:002389	Calcium channel activity	GO_molecular_function	GO:0005262	EXONT:000001,EXONT:000004,EXONT:002363,EXONT:002384,EXONT:002385,EXONT:002386,EXONT:002387,EXONT:002388,EXONT:002391,EXONT:002392,EXONT:002393,EXONT:002394,EXONT:002395,EXONT:002396,EXONT:002397,EXONT:002398
EXONT:002390	Intracellular calcium-release channel	IPR_Domain	IPR000699	EXONT:000001,EXONT:000004,EXONT:002363,EXONT:002384,EXONT:002385,EXONT:002386,EXONT:002387,EXONT:002388,EXONT:002389,EXONT:002391,EXONT:002392,EXONT:002393,EXONT:002394,EXONT:002395,EXONT:002396,EXONT:002397,EXONT:002398
EXONT:002391	Substrate-specific channel activity	GO_molecular_function	GO:0022838	EXONT:000001,EXONT:000004,EXONT:002363,EXONT:002384,EXONT:002385,EXONT:002393,EXONT:002394
EXONT:002392	Cation transmembrane transporter activity	GO_molecular_function	GO:0008324	EXONT:000001,EXONT:000004,EXONT:002363,EXONT:002384,EXONT:002385,EXONT:002386
EXONT:002393	Passive transmembrane transporter activity	GO_molecular_function	GO:0022803	EXONT:000001,EXONT:000004,EXONT:002384
EXONT:002394	Channel activity	GO_molecular_function	GO:0015267	EXONT:000001,EXONT:000004,EXONT:002384,EXONT:002393
EXONT:002395	Inorganic cation transmembrane transporter activity	GO_molecular_function	GO:0022890	EXONT:000001,EXONT:000004,EXONT:002363,EXONT:002384,EXONT:002385,EXONT:002386,EXONT:002392
EXONT:002396	Metal ion transmembrane transporter activity	GO_molecular_function	GO:0046873	EXONT:000001,EXONT:000004,EXONT:002363,EXONT:002384,EXONT:002385,EXONT:002386,EXONT:002392,EXONT:002395
EXONT:002397	Calcium ion transmembrane transporter activity	GO_molecular_function	GO:0015085	EXONT:000001,EXONT:000004,EXONT:002363,EXONT:002384,EXONT:002385,EXONT:002386,EXONT:002392,EXONT:002395,EXONT:002396,EXONT:002398
EXONT:002398	Divalent inorganic cation transmembrane transporter activity	GO_molecular_function	GO:0072509	EXONT:000001,EXONT:000004,EXONT:002363,EXONT:002384,EXONT:002385,EXONT:002386,EXONT:002392,EXONT:002395
EXONT:002447	Hydrolase activity, acting on acid anhydrides, catalyzing transmembrane movement of substances	GO_molecular_function	GO:0016820	EXONT:000001,EXONT:000002,EXONT:000004,EXONT:001893,EXONT:001943,EXONT:002384
EXONT:002448	ATPase, F1/V1/A1 complex, alpha/beta subunit, C-terminal	IPR_Domain	IPR000793	EXONT:000001,EXONT:000002,EXONT:000004,EXONT:001893,EXONT:001943,EXONT:002384,EXONT:002447
EXONT:002538	Sulfur compound transmembrane transporter activity	GO_molecular_function	GO:1901682	EXONT:000001,EXONT:000004,EXONT:002384
EXONT:002539	Sulfate transmembrane transporter activity	GO_molecular_function	GO:0015116	EXONT:000001,EXONT:000004,EXONT:002363,EXONT:002384,EXONT:002385,EXONT:002386,EXONT:002538,EXONT:002544,EXONT:002545
EXONT:002540	Secondary active sulfate transmembrane transporter activity	GO_molecular_function	GO:0008271	EXONT:000001,EXONT:000004,EXONT:002363,EXONT:002384,EXONT:002385,EXONT:002386,EXONT:002538,EXONT:002539,EXONT:002542,EXONT:002543,EXONT:002544,EXONT:002545
EXONT:002542	Active transmembrane transporter activity	GO_molecular_function	GO:0022804	EXONT:000001,EXONT:000004,EXONT:002384
EXONT:002543	Secondary active transmembrane transporter activity	GO_molecular_function	GO:0015291	EXONT:000001,EXONT:000004,EXONT:002384,EXONT:002542
EXONT:002544	Anion transmembrane transporter activity	GO_molecular_function	GO:0008509	EXONT:000001,EXONT:000004,EXONT:002363,EXONT:002384,EXONT:002385,EXONT:002386
EXONT:002545	Inorganic anion transmembrane transporter activity	GO_molecular_function	GO:0015103	EXONT:000001,EXONT:000004,EXONT:002363,EXONT:002384,EXONT:002385,EXONT:002386,EXONT:002544
EXONT:002595	2Fe-2S ferredoxin-type domain	IPR_Domain	IPR001041	EXONT:000001,EXONT:000004,EXONT:000005,EXONT:000011,EXONT:000013,EXONT:002205,EXONT:002206,EXONT:002596
EXONT:002648	ATPase activity, coupled to transmembrane movement of substances	GO_molecular_function	GO:0042626	EXONT:000001,EXONT:000002,EXONT:000004,EXONT:001893,EXONT:001943,EXONT:001944,EXONT:002054,EXONT:002055,EXONT:002350,EXONT:002351,EXONT:002384,EXONT:002447,EXONT:002542,EXONT:002651,EXONT:002652,EXONT:002653
EXONT:002649	ABC transporter, transmembrane domain	IPR_Domain	IPR001140	EXONT:000001,EXONT:000002,EXONT:000004,EXONT:000005,EXONT:001893,EXONT:001928,EXONT:001932,EXONT:001937,EXONT:001943,EXONT:001944,EXONT:001984,EXONT:001985,EXONT:001986,EXONT:001987,EXONT:001988,EXONT:001989,EXONT:001990,EXONT:001991,EXONT:001992,EXONT:001993,EXONT:001994,EXONT:001995,EXONT:001996,EXONT:001997,EXONT:001998,EXONT:001999,EXONT:002054,EXONT:002055,EXONT:002350,EXONT:002351,EXONT:002…
EXONT:002650	ABC transporter type 1, transmembrane domain	IPR_Domain	IPR011527	EXONT:000001,EXONT:000002,EXONT:000004,EXONT:000005,EXONT:001893,EXONT:001928,EXONT:001932,EXONT:001937,EXONT:001943,EXONT:001944,EXONT:001984,EXONT:001985,EXONT:001986,EXONT:001987,EXONT:001988,EXONT:001989,EXONT:001990,EXONT:001991,EXONT:001992,EXONT:001993,EXONT:001994,EXONT:001995,EXONT:001996,EXONT:001997,EXONT:001998,EXONT:001999,EXONT:002054,EXONT:002055,EXONT:002350,EXONT:002351,EXONT:002…
EXONT:002651	Primary active transmembrane transporter activity	GO_molecular_function	GO:0015399	EXONT:000001,EXONT:000004,EXONT:002384,EXONT:002542
EXONT:002652	P-P-bond-hydrolysis-driven transmembrane transporter activity	GO_molecular_function	GO:0015405	EXONT:000001,EXONT:000004,EXONT:002384,EXONT:002542,EXONT:002651
EXONT:002744	Ionotropic glutamate receptor activity	GO_molecular_function	GO:0004970	EXONT:000001,EXONT:000003,EXONT:000004,EXONT:000012,EXONT:002242,EXONT:002243,EXONT:002363,EXONT:002384,EXONT:002385,EXONT:002386,EXONT:002387,EXONT:002391,EXONT:002393,EXONT:002394,EXONT:002743,EXONT:002746,EXONT:002747,EXONT:002748,EXONT:002749
EXONT:002745	Ionotropic glutamate receptor	IPR_Domain	IPR001320	EXONT:000001,EXONT:000003,EXONT:000004,EXONT:000012,EXONT:002242,EXONT:002243,EXONT:002363,EXONT:002384,EXONT:002385,EXONT:002386,EXONT:002387,EXONT:002391,EXONT:002393,EXONT:002394,EXONT:002743,EXONT:002744,EXONT:002746,EXONT:002747,EXONT:002748,EXONT:002749,EXONT:002750,EXONT:002751
EXONT:002746	Ligand-gated ion channel activity	GO_molecular_function	GO:0015276	EXONT:000001,EXONT:000004,EXONT:002363,EXONT:002384,EXONT:002385,EXONT:002386,EXONT:002387,EXONT:002391,EXONT:002393,EXONT:002394,EXONT:002748,EXONT:002749
EXONT:002747	Extracellular ligand-gated ion channel activity	GO_molecular_function	GO:0005230	EXONT:000001,EXONT:000004,EXONT:002363,EXONT:002384,EXONT:002385,EXONT:002386,EXONT:002387,EXONT:002391,EXONT:002393,EXONT:002394,EXONT:002746,EXONT:002748,EXONT:002749
EXONT:002748	Gated channel activity	GO_molecular_function	GO:0022836	EXONT:000001,EXONT:000004,EXONT:002384,EXONT:002393,EXONT:002394
EXONT:002749	Ligand-gated channel activity	GO_molecular_function	GO:0022834	EXONT:000001,EXONT:000004,EXONT:002384,EXONT:002393,EXONT:002394,EXONT:002748
EXONT:002750	Excitatory extracellular ligand-gated ion channel activity	GO_molecular_function	GO:0005231	EXONT:000001,EXONT:000004,EXONT:002363,EXONT:002384,EXONT:002385,EXONT:002386,EXONT:002387,EXONT:002391,EXONT:002393,EXONT:002394,EXONT:002746,EXONT:002747,EXONT:002748,EXONT:002749
EXONT:002751	Extracellular-glutamate-gated ion channel activity	GO_molecular_function	GO:0005234	EXONT:000001,EXONT:000004,EXONT:002363,EXONT:002384,EXONT:002385,EXONT:002386,EXONT:002387,EXONT:002391,EXONT:002393,EXONT:002394,EXONT:002746,EXONT:002747,EXONT:002748,EXONT:002749,EXONT:002750
EXONT:002898	Synaptotagmin	IPR_Domain	IPR001565	EXONT:000001,EXONT:000004
EXONT:002935	Extracellular solute-binding protein, family 3	IPR_Domain	IPR001638	EXONT:000001,EXONT:000004
EXONT:002971	Lipid transporter activity	GO_molecular_function	GO:0005319	EXONT:000001,EXONT:000004,EXONT:002363
EXONT:002972	Lipid transport protein, N-terminal	IPR_Domain	IPR001747	EXONT:000001,EXONT:000004,EXONT:002363,EXONT:002971
EXONT:003137	Glutaredoxin	IPR_Domain	IPR002109	EXONT:000001,EXONT:000002,EXONT:000004,EXONT:000013,EXONT:001912,EXONT:003020,EXONT:003021,EXONT:003022
EXONT:003164	Phosphotransferase/anion transporter	IPR_Domain	IPR016152	EXONT:000001,EXONT:000004
EXONT:003165	PTS EIIA type-2 domain	IPR_Domain	IPR002178	EXONT:000001,EXONT:000004,EXONT:003164
EXONT:003214	Monovalent inorganic cation transmembrane transporter activity	GO_molecular_function	GO:0015077	EXONT:000001,EXONT:000004,EXONT:002363,EXONT:002384,EXONT:002385,EXONT:002386,EXONT:002392,EXONT:002395
EXONT:003215	Hydrogen ion transmembrane transporter activity	GO_molecular_function	GO:0015078	EXONT:000001,EXONT:000004,EXONT:002363,EXONT:002384,EXONT:002385,EXONT:002386,EXONT:002392,EXONT:002395,EXONT:003214
EXONT:003216	V-ATPase proteolipid subunit C-like domain	IPR_Domain	IPR002379	EXONT:000001,EXONT:000004,EXONT:002363,EXONT:002384,EXONT:002385,EXONT:002386,EXONT:002392,EXONT:002395,EXONT:003214,EXONT:003215
EXONT:003222	Cytochrome-c oxidase activity	GO_molecular_function	GO:0004129	EXONT:000001,EXONT:000002,EXONT:000004,EXONT:000013,EXONT:001912,EXONT:002141,EXONT:002363,EXONT:002384,EXONT:002385,EXONT:002386,EXONT:002392,EXONT:002395,EXONT:003214,EXONT:003215,EXONT:003223,EXONT:003224
EXONT:003325	Importin-alpha, importin-beta-binding domain	IPR_Domain	IPR002652	EXONT:000001,EXONT:000004,EXONT:002363,EXONT:002364
EXONT:003458	Cytochrome c domain	IPR_Domain	IPR003088	EXONT:000001,EXONT:000004,EXONT:000005,EXONT:000013,EXONT:001928,EXONT:001932,EXONT:001937,EXONT:001938,EXONT:001939,EXONT:001940,EXONT:002255,EXONT:002678,EXONT:002679,EXONT:003459
EXONT:003459	Cytochrome c-like domain	IPR_Domain	IPR009056	EXONT:000001,EXONT:000004,EXONT:000005,EXONT:000013,EXONT:001928,EXONT:001932,EXONT:002678,EXONT:002679
EXONT:003937	Calmodulin-binding domain	IPR_Domain	IPR004178	EXONT:000001,EXONT:000004,EXONT:000005,EXONT:001885,EXONT:002363,EXONT:002384,EXONT:002385,EXONT:002386,EXONT:002387,EXONT:002388,EXONT:002391,EXONT:002392,EXONT:002393,EXONT:002394,EXONT:002395,EXONT:002396,EXONT:002748,EXONT:003214,EXONT:003936,EXONT:003938,EXONT:003939,EXONT:003940,EXONT:003941,EXONT:003942
EXONT:003938	Ion gated channel activity	GO_molecular_function	GO:0022839	EXONT:000001,EXONT:000004,EXONT:002384,EXONT:002393,EXONT:002394,EXONT:002748
EXONT:003939	Calcium-activated potassium channel activity	GO_molecular_function	GO:0015269	EXONT:000001,EXONT:000004,EXONT:002363,EXONT:002384,EXONT:002385,EXONT:002386,EXONT:002387,EXONT:002388,EXONT:002391,EXONT:002392,EXONT:002393,EXONT:002394,EXONT:002395,EXONT:002396,EXONT:002748,EXONT:003214,EXONT:003938,EXONT:003940,EXONT:003941,EXONT:003942
EXONT:003940	Calcium activated cation channel activity	GO_molecular_function	GO:0005227	EXONT:000001,EXONT:000004,EXONT:002363,EXONT:002384,EXONT:002385,EXONT:002386,EXONT:002387,EXONT:002388,EXONT:002391,EXONT:002392,EXONT:002393,EXONT:002394,EXONT:002748,EXONT:003938
EXONT:003941	Potassium channel activity	GO_molecular_function	GO:0005267	EXONT:000001,EXONT:000004,EXONT:002363,EXONT:002384,EXONT:002385,EXONT:002386,EXONT:002387,EXONT:002388,EXONT:002391,EXONT:002392,EXONT:002393,EXONT:002394,EXONT:002395,EXONT:002396,EXONT:003214,EXONT:003942
EXONT:003942	Potassium ion transmembrane transporter activity	GO_molecular_function	GO:0015079	EXONT:000001,EXONT:000004,EXONT:002363,EXONT:002384,EXONT:002385,EXONT:002386,EXONT:002392,EXONT:002395,EXONT:002396,EXONT:003214
EXONT:003959	Ubiquinol-cytochrome-c reductase activity	GO_molecular_function	GO:0008121	EXONT:000001,EXONT:000002,EXONT:000004,EXONT:001912,EXONT:002363,EXONT:002384,EXONT:002385,EXONT:002386,EXONT:002392,EXONT:002395,EXONT:003214,EXONT:003215,EXONT:003957,EXONT:003958
EXONT:003960	Ubiquinol cytochrome reductase, transmembrane domain	IPR_Domain	IPR004192	EXONT:000001,EXONT:000002,EXONT:000004,EXONT:001912,EXONT:002363,EXONT:002384,EXONT:002385,EXONT:002386,EXONT:002392,EXONT:002395,EXONT:003214,EXONT:003215,EXONT:003957,EXONT:003958,EXONT:003959
EXONT:004082	Solute:cation antiporter activity	GO_molecular_function	GO:0015298	EXONT:000001,EXONT:000004,EXONT:002363,EXONT:002384,EXONT:002385,EXONT:002386,EXONT:002392,EXONT:002542,EXONT:002543,EXONT:004085
EXONT:004083	Solute:proton antiporter activity	GO_molecular_function	GO:0015299	EXONT:000001,EXONT:000004,EXONT:002363,EXONT:002384,EXONT:002385,EXONT:002386,EXONT:002392,EXONT:002395,EXONT:002542,EXONT:002543,EXONT:003214,EXONT:003215,EXONT:004082,EXONT:004085
EXONT:004084	Cation/H+ exchanger	IPR_Domain	IPR006153	EXONT:000001,EXONT:000004,EXONT:002363,EXONT:002384,EXONT:002385,EXONT:002386,EXONT:002392,EXONT:002395,EXONT:002542,EXONT:002543,EXONT:003214,EXONT:003215,EXONT:004082,EXONT:004083,EXONT:004085
EXONT:004085	Antiporter activity	GO_molecular_function	GO:0015297	EXONT:000001,EXONT:000004,EXONT:002384,EXONT:002542,EXONT:002543
EXONT:004382	Rieske iron-sulphur protein, C-terminal	IPR_Domain	IPR005805	EXONT:000001,EXONT:000002,EXONT:000004,EXONT:000005,EXONT:001912,EXONT:002205,EXONT:002206,EXONT:002363,EXONT:002384,EXONT:002385,EXONT:002386,EXONT:002392,EXONT:002395,EXONT:002944,EXONT:003214,EXONT:003215,EXONT:003957,EXONT:003958,EXONT:003959,EXONT:004381
EXONT:004386	Ion transport domain	IPR_Domain	IPR005821	EXONT:000001,EXONT:000004,EXONT:002363,EXONT:002384,EXONT:002385,EXONT:002386,EXONT:002387,EXONT:002391,EXONT:002393,EXONT:002394
EXONT:004389	Sugar transporter, conserved site	IPR_Site	IPR005829	EXONT:000001,EXONT:000004
EXONT:004543	Neurotransmitter-gated ion-channel ligand-binding	IPR_Domain	IPR006202	EXONT:000001,EXONT:000004,EXONT:002363,EXONT:002384,EXONT:002385,EXONT:002386,EXONT:002387,EXONT:002391,EXONT:002393,EXONT:002394,EXONT:002746,EXONT:002747,EXONT:002748,EXONT:002749
EXONT:004566	Ubiquinol-cytochrome c reductase, iron-sulphur subunit	IPR_Domain	IPR006317	EXONT:000001,EXONT:000002,EXONT:000004,EXONT:001912,EXONT:002363,EXONT:002384,EXONT:002385,EXONT:002386,EXONT:002392,EXONT:002395,EXONT:003214,EXONT:003215,EXONT:003957,EXONT:003958,EXONT:003959
EXONT:004570	Solute:cation symporter activity	GO_molecular_function	GO:0015294	EXONT:000001,EXONT:000004,EXONT:002363,EXONT:002384,EXONT:002385,EXONT:002386,EXONT:002392,EXONT:002542,EXONT:002543,EXONT:004571
EXONT:004571	Symporter activity	GO_molecular_function	GO:0015293	EXONT:000001,EXONT:000004,EXONT:002384,EXONT:002542,EXONT:002543
EXONT:004708	SLC41 divalent cation transporters, integral membrane domain	IPR_Domain	IPR006667	EXONT:000001,EXONT:000004,EXONT:002363,EXONT:002384,EXONT:002385,EXONT:002386,EXONT:002392
EXONT:004829	Uso1/p115-like vesicle tethering protein, C-terminal	IPR_Domain	IPR006955	EXONT:000001,EXONT:000004,EXONT:002363,EXONT:002364
EXONT:005518	Lipid transport, open beta-sheet	IPR_Domain	IPR009454	EXONT:000001,EXONT:000004,EXONT:002363,EXONT:002971
EXONT:005522	Intracellular ligand-gated ion channel activity	GO_molecular_function	GO:0005217	EXONT:000001,EXONT:000004,EXONT:002363,EXONT:002384,EXONT:002385,EXONT:002386,EXONT:002387,EXONT:002391,EXONT:002393,EXONT:002394,EXONT:002746,EXONT:002748,EXONT:002749
EXONT:005523	Intracellular ligand-gated calcium channel activity	GO_molecular_function	GO:0005218	EXONT:000001,EXONT:000004,EXONT:002363,EXONT:002384,EXONT:002385,EXONT:002386,EXONT:002387,EXONT:002388,EXONT:002389,EXONT:002391,EXONT:002392,EXONT:002393,EXONT:002394,EXONT:002395,EXONT:002396,EXONT:002397,EXONT:002398,EXONT:002746,EXONT:002748,EXONT:002749,EXONT:005522,EXONT:005526
EXONT:005524	Ryanodine-sensitive calcium-release channel activity	GO_molecular_function	GO:0005219	EXONT:000001,EXONT:000004,EXONT:002363,EXONT:002384,EXONT:002385,EXONT:002386,EXONT:002387,EXONT:002388,EXONT:002389,EXONT:002391,EXONT:002392,EXONT:002393,EXONT:002394,EXONT:002395,EXONT:002396,EXONT:002397,EXONT:002398,EXONT:002746,EXONT:002748,EXONT:002749,EXONT:005522,EXONT:005523,EXONT:005526
EXONT:005525	Ryanodine Receptor TM 4-6	IPR_Domain	IPR009460	EXONT:000001,EXONT:000004,EXONT:002363,EXONT:002384,EXONT:002385,EXONT:002386,EXONT:002387,EXONT:002388,EXONT:002389,EXONT:002391,EXONT:002392,EXONT:002393,EXONT:002394,EXONT:002395,EXONT:002396,EXONT:002397,EXONT:002398,EXONT:002746,EXONT:002748,EXONT:002749,EXONT:005522,EXONT:005523,EXONT:005524,EXONT:005526
EXONT:005526	Calcium-release channel activity	GO_molecular_function	GO:0015278	EXONT:000001,EXONT:000004,EXONT:002363,EXONT:002384,EXONT:002385,EXONT:002386,EXONT:002387,EXONT:002388,EXONT:002389,EXONT:002391,EXONT:002392,EXONT:002393,EXONT:002394,EXONT:002395,EXONT:002396,EXONT:002397,EXONT:002398,EXONT:002746,EXONT:002748,EXONT:002749
EXONT:005712	Peroxisomal fatty acyl CoA transporter, transmembrane domain	IPR_Domain	IPR010509	EXONT:000001,EXONT:000002,EXONT:000004,EXONT:000005,EXONT:001893,EXONT:001928,EXONT:001932,EXONT:001937,EXONT:001943,EXONT:001944,EXONT:001984,EXONT:001985,EXONT:001986,EXONT:001987,EXONT:001988,EXONT:001989,EXONT:001990,EXONT:001991,EXONT:001992,EXONT:001993,EXONT:001994,EXONT:001995,EXONT:001996,EXONT:001997,EXONT:001998,EXONT:001999,EXONT:002054,EXONT:002055,EXONT:002350,EXONT:002351,EXONT:002…
EXONT:005723	Sodium channel activity	GO_molecular_function	GO:0005272	EXONT:000001,EXONT:000004,EXONT:002363,EXONT:002384,EXONT:002385,EXONT:002386,EXONT:002387,EXONT:002388,EXONT:002391,EXONT:002392,EXONT:002393,EXONT:002394,EXONT:002395,EXONT:002396,EXONT:003214,EXONT:005729
EXONT:005724	Voltage-gated sodium channel activity	GO_molecular_function	GO:0005248	EXONT:000001,EXONT:000004,EXONT:002363,EXONT:002384,EXONT:002385,EXONT:002386,EXONT:002387,EXONT:002388,EXONT:002391,EXONT:002392,EXONT:002393,EXONT:002394,EXONT:002395,EXONT:002396,EXONT:002748,EXONT:003214,EXONT:005723,EXONT:005726,EXONT:005727,EXONT:005728,EXONT:005729
EXONT:005725	Sodium ion transport-associated	IPR_Domain	IPR010526	EXONT:000001,EXONT:000004,EXONT:002363,EXONT:002384,EXONT:002385,EXONT:002386,EXONT:002387,EXONT:002388,EXONT:002391,EXONT:002392,EXONT:002393,EXONT:002394,EXONT:002395,EXONT:002396,EXONT:002748,EXONT:003214,EXONT:005723,EXONT:005724,EXONT:005726,EXONT:005727,EXONT:005728,EXONT:005729
EXONT:005726	Voltage-gated ion channel activity	GO_molecular_function	GO:0005244	EXONT:000001,EXONT:000004,EXONT:002363,EXONT:002384,EXONT:002385,EXONT:002386,EXONT:002387,EXONT:002391,EXONT:002393,EXONT:002394,EXONT:002748,EXONT:005728
EXONT:005727	Voltage-gated cation channel activity	GO_molecular_function	GO:0022843	EXONT:000001,EXONT:000004,EXONT:002363,EXONT:002384,EXONT:002385,EXONT:002386,EXONT:002387,EXONT:002388,EXONT:002391,EXONT:002392,EXONT:002393,EXONT:002394,EXONT:002748,EXONT:005726,EXONT:005728
EXONT:005728	Voltage-gated channel activity	GO_molecular_function	GO:0022832	EXONT:000001,EXONT:000004,EXONT:002384,EXONT:002393,EXONT:002394,EXONT:002748
EXONT:005729	Sodium ion transmembrane transporter activity	GO_molecular_function	GO:0015081	EXONT:000001,EXONT:000004,EXONT:002363,EXONT:002384,EXONT:002385,EXONT:002386,EXONT:002392,EXONT:002395,EXONT:002396,EXONT:003214
EXONT:005880	Carbohydrate derivative transporter activity	GO_molecular_function	GO:1901505	EXONT:000001,EXONT:000004
EXONT:005909	Vitellinogen, superhelical	IPR_Domain	IPR011030	EXONT:000001,EXONT:000004,EXONT:002363,EXONT:002971
EXONT:006086	Sulphate transporter	IPR_Domain	IPR011547	EXONT:000001,EXONT:000004,EXONT:002363,EXONT:002384,EXONT:002385,EXONT:002386,EXONT:002538,EXONT:002539,EXONT:002544,EXONT:002545
EXONT:006192	Glutaredoxin active site	IPR_Site	IPR011767	EXONT:000001,EXONT:000002,EXONT:000004,EXONT:000013,EXONT:000018
EXONT:006206	Glutaredoxin subgroup	IPR_Domain	IPR014025	EXONT:000001,EXONT:000002,EXONT:000004,EXONT:000013,EXONT:001912,EXONT:003020,EXONT:003021,EXONT:003022,EXONT:003137
EXONT:006207	Glutaredoxin, eukaryotic/virial	IPR_Domain	IPR011899	EXONT:000001,EXONT:000002,EXONT:000004,EXONT:000013,EXONT:001912,EXONT:003020,EXONT:003021,EXONT:003022,EXONT:003137,EXONT:006206
EXONT:006221	ATPase, V1 complex, subunit H, C-terminal	IPR_Domain	IPR011987	EXONT:000001,EXONT:000002,EXONT:000004,EXONT:001893,EXONT:001943,EXONT:002384,EXONT:002447
EXONT:006406	Potassium channel, voltage dependent, Kv1.4, tandem inactivation domain	IPR_Domain	IPR012897	EXONT:000001,EXONT:000004,EXONT:000005,EXONT:001937,EXONT:001938,EXONT:001939,EXONT:002363,EXONT:002384,EXONT:002385,EXONT:002386,EXONT:002387,EXONT:002388,EXONT:002391,EXONT:002392,EXONT:002393,EXONT:002394,EXONT:002395,EXONT:002396,EXONT:002748,EXONT:003214,EXONT:003941,EXONT:003942,EXONT:005726,EXONT:005727,EXONT:005728,EXONT:006404,EXONT:006405,EXONT:006407
EXONT:006407	Voltage-gated potassium channel activity	GO_molecular_function	GO:0005249	EXONT:000001,EXONT:000004,EXONT:002363,EXONT:002384,EXONT:002385,EXONT:002386,EXONT:002387,EXONT:002388,EXONT:002391,EXONT:002392,EXONT:002393,EXONT:002394,EXONT:002395,EXONT:002396,EXONT:002748,EXONT:003214,EXONT:003941,EXONT:003942,EXONT:005726,EXONT:005727,EXONT:005728
EXONT:006523	Neurotransmitter transporter activity	GO_molecular_function	GO:0005326	EXONT:000001,EXONT:000004
EXONT:006524	Neurotransmitter:sodium symporter activity	GO_molecular_function	GO:0005328	EXONT:000001,EXONT:000004,EXONT:002363,EXONT:002384,EXONT:002385,EXONT:002386,EXONT:002392,EXONT:002395,EXONT:002396,EXONT:002542,EXONT:002543,EXONT:003214,EXONT:004570,EXONT:004571,EXONT:005729,EXONT:006523,EXONT:006530
EXONT:006525	Serotonin:sodium symporter activity	GO_molecular_function	GO:0005335	EXONT:000001,EXONT:000004,EXONT:002363,EXONT:002384,EXONT:002385,EXONT:002386,EXONT:002392,EXONT:002395,EXONT:002396,EXONT:002542,EXONT:002543,EXONT:003214,EXONT:004570,EXONT:004571,EXONT:005729,EXONT:006523,EXONT:006524,EXONT:006527,EXONT:006528,EXONT:006529,EXONT:006530
EXONT:006526	Sodium:neurotransmitter symporter, serotonin, N-terminal	IPR_Domain	IPR013086	EXONT:000001,EXONT:000004,EXONT:002363,EXONT:002384,EXONT:002385,EXONT:002386,EXONT:002392,EXONT:002395,EXONT:002396,EXONT:002542,EXONT:002543,EXONT:003214,EXONT:004570,EXONT:004571,EXONT:005729,EXONT:006523,EXONT:006524,EXONT:006525,EXONT:006527,EXONT:006528,EXONT:006529,EXONT:006530
EXONT:006527	Organic hydroxy compound transmembrane transporter activity	GO_molecular_function	GO:1901618	EXONT:000001,EXONT:000004,EXONT:002384
EXONT:006528	Serotonin transmembrane transporter activity	GO_molecular_function	GO:0015222	EXONT:000001,EXONT:000004,EXONT:002363,EXONT:002384,EXONT:002385,EXONT:002386,EXONT:002392,EXONT:002542,EXONT:006527,EXONT:006529
EXONT:006529	Monoamine transmembrane transporter activity	GO_molecular_function	GO:0008504	EXONT:000001,EXONT:000004,EXONT:002363,EXONT:002384,EXONT:002385,EXONT:002542
EXONT:006530	Solute:sodium symporter activity	GO_molecular_function	GO:0015370	EXONT:000001,EXONT:000004,EXONT:002363,EXONT:002384,EXONT:002385,EXONT:002386,EXONT:002392,EXONT:002395,EXONT:002396,EXONT:002542,EXONT:002543,EXONT:003214,EXONT:004570,EXONT:004571,EXONT:005729
EXONT:006944	Band 3 cytoplasmic domain	IPR_Domain	IPR013769	EXONT:000001,EXONT:000004,EXONT:002363,EXONT:002384,EXONT:002385,EXONT:002386,EXONT:002544
EXONT:007156	Chloride channel, core	IPR_Domain	IPR014743	EXONT:000001,EXONT:000004,EXONT:002363,EXONT:002384,EXONT:002385,EXONT:002386,EXONT:002387,EXONT:002391,EXONT:002393,EXONT:002394
EXONT:007214	Glycolipid transporter activity	GO_molecular_function	GO:0017089	EXONT:000001,EXONT:000004,EXONT:002363,EXONT:002971,EXONT:005880
EXONT:007215	Glycolipid transfer protein domain	IPR_Domain	IPR014830	EXONT:000001,EXONT:000004,EXONT:000005,EXONT:001992,EXONT:002236,EXONT:002363,EXONT:002971,EXONT:005880,EXONT:007214,EXONT:007216
EXONT:007377	Gastric H+/K+-transporter P-type ATPase, N-terminal	IPR_Domain	IPR015127	EXONT:000001,EXONT:000002,EXONT:000004,EXONT:000005,EXONT:001893,EXONT:001928,EXONT:001932,EXONT:001937,EXONT:001938,EXONT:001939,EXONT:001943,EXONT:001944,EXONT:001946,EXONT:001984,EXONT:001985,EXONT:001986,EXONT:001987,EXONT:001988,EXONT:001989,EXONT:001990,EXONT:001991,EXONT:001992,EXONT:001993,EXONT:001994,EXONT:001995,EXONT:001996,EXONT:001997,EXONT:001998,EXONT:001999,EXONT:002054,EXONT:002…
EXONT:007378	ATPase activity, coupled to transmembrane movement of ions	GO_molecular_function	GO:0042625	EXONT:000001,EXONT:000002,EXONT:000004,EXONT:001893,EXONT:001943,EXONT:001944,EXONT:002054,EXONT:002055,EXONT:002350,EXONT:002351,EXONT:002363,EXONT:002384,EXONT:002385,EXONT:002386,EXONT:002447,EXONT:002542,EXONT:002648,EXONT:002651,EXONT:002652,EXONT:002653
EXONT:007379	ATPase activity, coupled to transmembrane movement of ions, phosphorylative mechanism	GO_molecular_function	GO:0015662	EXONT:000001,EXONT:000002,EXONT:000004,EXONT:001893,EXONT:001943,EXONT:001944,EXONT:002054,EXONT:002055,EXONT:002350,EXONT:002351,EXONT:002363,EXONT:002384,EXONT:002385,EXONT:002386,EXONT:002447,EXONT:002542,EXONT:002648,EXONT:002651,EXONT:002652,EXONT:002653,EXONT:007378
EXONT:007380	Potassium-transporting ATPase activity	GO_molecular_function	GO:0008556	EXONT:000001,EXONT:000002,EXONT:000004,EXONT:001893,EXONT:001943,EXONT:001944,EXONT:002054,EXONT:002055,EXONT:002350,EXONT:002351,EXONT:002363,EXONT:002384,EXONT:002385,EXONT:002386,EXONT:002392,EXONT:002395,EXONT:002396,EXONT:002447,EXONT:002542,EXONT:002648,EXONT:002651,EXONT:002652,EXONT:002653,EXONT:003214,EXONT:003942,EXONT:007378,EXONT:007379,EXONT:007382
EXONT:007381	Hydrogen:potassium-exchanging ATPase activity	GO_molecular_function	GO:0008900	EXONT:000001,EXONT:000002,EXONT:000004,EXONT:001893,EXONT:001943,EXONT:001944,EXONT:002054,EXONT:002055,EXONT:002350,EXONT:002351,EXONT:002363,EXONT:002384,EXONT:002385,EXONT:002386,EXONT:002392,EXONT:002395,EXONT:002396,EXONT:002447,EXONT:002542,EXONT:002648,EXONT:002651,EXONT:002652,EXONT:002653,EXONT:003214,EXONT:003215,EXONT:003942,EXONT:007378,EXONT:007379,EXONT:007380,EXONT:007382
EXONT:007382	Cation-transporting ATPase activity	GO_molecular_function	GO:0019829	EXONT:000001,EXONT:000002,EXONT:000004,EXONT:001893,EXONT:001943,EXONT:001944,EXONT:002054,EXONT:002055,EXONT:002350,EXONT:002351,EXONT:002363,EXONT:002384,EXONT:002385,EXONT:002386,EXONT:002392,EXONT:002447,EXONT:002542,EXONT:002648,EXONT:002651,EXONT:002652,EXONT:002653,EXONT:007378
EXONT:007480	Ubiquinol-cytochrome c reductase 8kDa, N-terminal	IPR_Domain	IPR015248	EXONT:000001,EXONT:000002,EXONT:000004,EXONT:000011,EXONT:001912,EXONT:002363,EXONT:002384,EXONT:002385,EXONT:002386,EXONT:002392,EXONT:002395,EXONT:003214,EXONT:003215,EXONT:003957,EXONT:003958,EXONT:003959,EXONT:003986
EXONT:007487	Vitellinogen, open beta-sheet	IPR_Domain	IPR015255	EXONT:000001,EXONT:000004,EXONT:002363,EXONT:002971
EXONT:007643	Vitellinogen, beta-sheet N-terminal	IPR_Domain	IPR015816	EXONT:000001,EXONT:000004,EXONT:002363,EXONT:002971
EXONT:007644	Vitellinogen, open beta-sheet, subdomain 1	IPR_Domain	IPR015817	EXONT:000001,EXONT:000004,EXONT:002363,EXONT:002971
EXONT:007645	Vitellinogen, open beta-sheet, subdomain 2	IPR_Domain	IPR015818	EXONT:000001,EXONT:000004,EXONT:002363,EXONT:002971
EXONT:007646	Lipid transport protein, beta-sheet shell	IPR_Domain	IPR015819	EXONT:000001,EXONT:000004,EXONT:002363,EXONT:002971
EXONT:008059	Sulphate anion transporter, conserved site	IPR_Site	IPR018045	EXONT:000001,EXONT:000004,EXONT:002363,EXONT:002384,EXONT:002385,EXONT:002386,EXONT:002538,EXONT:002539,EXONT:002540,EXONT:002542,EXONT:002543,EXONT:002544,EXONT:002545
EXONT:008061	Ammonium transmembrane transporter activity	GO_molecular_function	GO:0008519	EXONT:000001,EXONT:000004,EXONT:002363,EXONT:002384,EXONT:002385,EXONT:002386,EXONT:002392,EXONT:002395,EXONT:002544,EXONT:002545,EXONT:003214,EXONT:008063
EXONT:008063	Organic cation transmembrane transporter activity	GO_molecular_function	GO:0015101	EXONT:000001,EXONT:000004,EXONT:002363,EXONT:002384,EXONT:002385,EXONT:002386,EXONT:002392
EXONT:008192	Sodium/solute symporter, conserved site	IPR_Site	IPR018212	EXONT:000001,EXONT:000004
EXONT:008224	Anion:anion antiporter activity	GO_molecular_function	GO:0015301	EXONT:000001,EXONT:000004,EXONT:002363,EXONT:002384,EXONT:002385,EXONT:002386,EXONT:002542,EXONT:002543,EXONT:002544,EXONT:004085
EXONT:008225	Inorganic anion exchanger activity	GO_molecular_function	GO:0005452	EXONT:000001,EXONT:000004,EXONT:002363,EXONT:002384,EXONT:002385,EXONT:002386,EXONT:002542,EXONT:002543,EXONT:002544,EXONT:004085,EXONT:008224
EXONT:008226	Anion exchange, conserved site	IPR_Site	IPR018241	EXONT:000001,EXONT:000004,EXONT:002363,EXONT:002384,EXONT:002385,EXONT:002386,EXONT:002542,EXONT:002543,EXONT:002544,EXONT:004085,EXONT:008224,EXONT:008225
EXONT:008277	Adrenodoxin, iron-sulphur binding site	IPR_Site	IPR018298	EXONT:000001,EXONT:000004,EXONT:000005,EXONT:000013,EXONT:002205,EXONT:002206,EXONT:002944
EXONT:008334	PTR2 family proton/oligopeptide symporter, conserved site	IPR_Site	IPR018456	EXONT:000001,EXONT:000004
EXONT:008351	K/Cl co-transporter, type 1/type 3	IPR_Domain	IPR018491	EXONT:000001,EXONT:000004
EXONT:008354	Succinate dehydrogenase, cytochrome b subunit, conserved site	IPR_Site	IPR018495	EXONT:000001,EXONT:000002,EXONT:000004,EXONT:000013,EXONT:001912,EXONT:002480,EXONT:008355
EXONT:008364	Cytochrome c oxidase, subunit VIa, conserved site	IPR_Site	IPR018507	EXONT:000001,EXONT:000002,EXONT:000004,EXONT:000013,EXONT:001912,EXONT:002141,EXONT:002363,EXONT:002384,EXONT:002385,EXONT:002386,EXONT:002392,EXONT:002395,EXONT:003214,EXONT:003215,EXONT:003222,EXONT:003223,EXONT:003224
EXONT:008770	Glutamate receptor, L-glutamate/glycine-binding	IPR_Domain	IPR019594	EXONT:000001,EXONT:000003,EXONT:000004,EXONT:000012,EXONT:002242,EXONT:002243,EXONT:002363,EXONT:002384,EXONT:002385,EXONT:002386,EXONT:002387,EXONT:002391,EXONT:002393,EXONT:002394,EXONT:002743,EXONT:002744,EXONT:002746,EXONT:002747,EXONT:002748,EXONT:002749,EXONT:002750,EXONT:002751
EXONT:008989	Proton-transporting ATP synthase activity, rotational mechanism	GO_molecular_function	GO:0046933	EXONT:000001,EXONT:000002,EXONT:000004,EXONT:001893,EXONT:001943,EXONT:001944,EXONT:002054,EXONT:002055,EXONT:002350,EXONT:002351,EXONT:002363,EXONT:002384,EXONT:002385,EXONT:002386,EXONT:002392,EXONT:002395,EXONT:002447,EXONT:002542,EXONT:002648,EXONT:002651,EXONT:002652,EXONT:002653,EXONT:003214,EXONT:003215,EXONT:007378,EXONT:007382,EXONT:008991
EXONT:008990	ATPase, F1 complex, delta/epsilon subunit, N-terminal	IPR_Domain	IPR020546	EXONT:000001,EXONT:000002,EXONT:000004,EXONT:001893,EXONT:001943,EXONT:001944,EXONT:002054,EXONT:002055,EXONT:002350,EXONT:002351,EXONT:002363,EXONT:002384,EXONT:002385,EXONT:002386,EXONT:002392,EXONT:002395,EXONT:002447,EXONT:002542,EXONT:002648,EXONT:002651,EXONT:002652,EXONT:002653,EXONT:003214,EXONT:003215,EXONT:007378,EXONT:007382,EXONT:008989,EXONT:008991,EXONT:008992,EXONT:008993
EXONT:008991	ATPase activity, coupled to transmembrane movement of ions, rotational mechanism	GO_molecular_function	GO:0044769	EXONT:000001,EXONT:000002,EXONT:000004,EXONT:001893,EXONT:001943,EXONT:001944,EXONT:002054,EXONT:002055,EXONT:002350,EXONT:002351,EXONT:002363,EXONT:002384,EXONT:002385,EXONT:002386,EXONT:002447,EXONT:002542,EXONT:002648,EXONT:002651,EXONT:002652,EXONT:002653,EXONT:007378
EXONT:008992	Proton-transporting ATPase activity, rotational mechanism	GO_molecular_function	GO:0046961	EXONT:000001,EXONT:000002,EXONT:000004,EXONT:001893,EXONT:001943,EXONT:001944,EXONT:002054,EXONT:002055,EXONT:002350,EXONT:002351,EXONT:002363,EXONT:002384,EXONT:002385,EXONT:002386,EXONT:002392,EXONT:002395,EXONT:002447,EXONT:002542,EXONT:002648,EXONT:002651,EXONT:002652,EXONT:002653,EXONT:003214,EXONT:003215,EXONT:007378,EXONT:007382,EXONT:008991,EXONT:008993
EXONT:008993	Hydrogen-exporting ATPase activity	GO_molecular_function	GO:0036442	EXONT:000001,EXONT:000002,EXONT:000004,EXONT:001893,EXONT:001943,EXONT:001944,EXONT:002054,EXONT:002055,EXONT:002350,EXONT:002351,EXONT:002363,EXONT:002384,EXONT:002385,EXONT:002386,EXONT:002392,EXONT:002447,EXONT:002542,EXONT:002648,EXONT:002651,EXONT:002652,EXONT:002653,EXONT:007378,EXONT:007382
EXONT:009071	ATPase, F1 complex, OSCP/delta subunit, conserved site	IPR_Site	IPR020781	EXONT:000001,EXONT:000002,EXONT:000004,EXONT:001893,EXONT:001943,EXONT:001944,EXONT:002054,EXONT:002055,EXONT:002350,EXONT:002351,EXONT:002363,EXONT:002384,EXONT:002385,EXONT:002386,EXONT:002392,EXONT:002395,EXONT:002447,EXONT:002542,EXONT:002648,EXONT:002651,EXONT:002652,EXONT:002653,EXONT:003214,EXONT:003215,EXONT:007378,EXONT:007382,EXONT:008989,EXONT:008991
EXONT:009141	Na+ channel, amiloride-sensitive, conserved site	IPR_Site	IPR020903	EXONT:000001,EXONT:000004,EXONT:002363,EXONT:002384,EXONT:002385,EXONT:002386,EXONT:002387,EXONT:002388,EXONT:002391,EXONT:002392,EXONT:002393,EXONT:002394,EXONT:002395,EXONT:002396,EXONT:003214,EXONT:005723,EXONT:005729
EXONT:009162	Ankyrin-G binding site	IPR_Site	IPR020969	EXONT:000001,EXONT:000004,EXONT:000005,EXONT:002363,EXONT:002384,EXONT:002385,EXONT:002386,EXONT:002387,EXONT:002388,EXONT:002391,EXONT:002392,EXONT:002393,EXONT:002394,EXONT:002395,EXONT:002396,EXONT:003214,EXONT:003941,EXONT:003942
EXONT:009246	Glycerate/sugar phosphate transporter, conserved site	IPR_Site	IPR021159	EXONT:000001,EXONT:000004
EXONT:009424	Calcium-transporting ATPase activity	GO_molecular_function	GO:0005388	EXONT:000001,EXONT:000002,EXONT:000004,EXONT:001893,EXONT:001943,EXONT:001944,EXONT:002054,EXONT:002055,EXONT:002350,EXONT:002351,EXONT:002363,EXONT:002384,EXONT:002385,EXONT:002386,EXONT:002392,EXONT:002395,EXONT:002396,EXONT:002397,EXONT:002398,EXONT:002447,EXONT:002542,EXONT:002648,EXONT:002651,EXONT:002652,EXONT:002653,EXONT:007378,EXONT:007379,EXONT:007382
EXONT:009425	Calcium transporting P-type ATPase, C-terminal, plasma membrane	IPR_Domain	IPR022141	EXONT:000001,EXONT:000002,EXONT:000004,EXONT:001893,EXONT:001943,EXONT:001944,EXONT:002054,EXONT:002055,EXONT:002350,EXONT:002351,EXONT:002363,EXONT:002384,EXONT:002385,EXONT:002386,EXONT:002392,EXONT:002395,EXONT:002396,EXONT:002397,EXONT:002398,EXONT:002447,EXONT:002542,EXONT:002648,EXONT:002651,EXONT:002652,EXONT:002653,EXONT:007378,EXONT:007379,EXONT:007382,EXONT:009424
EXONT:009469	Major intrinsic protein, conserved site	IPR_Site	IPR022357	EXONT:000001,EXONT:000004
EXONT:010039	ATPase, F1 complex beta subunit/V1 complex, C-terminal	IPR_Domain	IPR024034	EXONT:000001,EXONT:000002,EXONT:000004,EXONT:001893,EXONT:001943,EXONT:002384,EXONT:002447,EXONT:002448
EXONT:010042	Ammonium transporter AmtB-like domain	IPR_Domain	IPR024041	EXONT:000001,EXONT:000004,EXONT:002363,EXONT:002384,EXONT:002385,EXONT:002386,EXONT:002392,EXONT:002395,EXONT:002544,EXONT:002545,EXONT:003214,EXONT:008061,EXONT:008063
EXONT:010464	Succinate dehydogenase/fumarate reductase N-terminal	IPR_Domain	IPR025192	EXONT:000001,EXONT:000004,EXONT:000005,EXONT:000011,EXONT:000013,EXONT:002205,EXONT:002206,EXONT:002595,EXONT:002596

## Sheet: Binding
EO identifier	Eo name	External database	External identifier	EO ancestors
EXONT:000005	Binding	GO,SO	GO:0005488,SO:0000409	EXONT:000001
EXONT:000014	Transcription factor activity, sequence-specific DNA binding	GO	GO:0003700	EXONT:000001,EXONT:000005
EXONT:000015	Transcription factor activity, transcription factor binding	GO	GO:0000989	EXONT:000001,EXONT:000005
EXONT:000038	Metal_binding_site	SO	SO:0001656	EXONT:000001,EXONT:000005
EXONT:000039	Polypeptide_metal_contact	SO	SO:0001092	EXONT:000001,EXONT:000005,EXONT:000007,EXONT:000025,EXONT:000026,EXONT:000038,EXONT:000040,EXONT:000041
EXONT:000042	Polypeptide_calcium_ion_contact_site	SO	SO:0001094	EXONT:000001,EXONT:000005,EXONT:000007,EXONT:000025,EXONT:000026,EXONT:000038,EXONT:000039,EXONT:000040,EXONT:000041
EXONT:000043	Polypeptide_cobalt_ion_contact_site	SO	SO:0001095	EXONT:000001,EXONT:000005,EXONT:000007,EXONT:000025,EXONT:000026,EXONT:000038,EXONT:000039,EXONT:000040,EXONT:000041
EXONT:000044	Polypeptide_copper_ion_contact_site	SO	SO:0001096	EXONT:000001,EXONT:000005,EXONT:000007,EXONT:000025,EXONT:000026,EXONT:000038,EXONT:000039,EXONT:000040,EXONT:000041
EXONT:000045	Polypeptide_iron_ion_contact_site	SO	SO:0001097	EXONT:000001,EXONT:000005,EXONT:000007,EXONT:000025,EXONT:000026,EXONT:000038,EXONT:000039,EXONT:000040,EXONT:000041
EXONT:000046	Polypeptide_magnesium_ion_contact_site	SO	SO:0001098	EXONT:000001,EXONT:000005,EXONT:000007,EXONT:000025,EXONT:000026,EXONT:000038,EXONT:000039,EXONT:000040,EXONT:000041
EXONT:000047	Polypeptide_manganese_ion_contact_site	SO	SO:0001099	EXONT:000001,EXONT:000005,EXONT:000007,EXONT:000025,EXONT:000026,EXONT:000038,EXONT:000039,EXONT:000040,EXONT:000041
EXONT:000048	Polypeptide_molybdenum_ion_contact_site	SO	SO:0001100	EXONT:000001,EXONT:000005,EXONT:000007,EXONT:000025,EXONT:000026,EXONT:000038,EXONT:000039,EXONT:000040,EXONT:000041
EXONT:000049	Polypeptide_nickel_ion_contact_site	SO	SO:0001101	EXONT:000001,EXONT:000005,EXONT:000007,EXONT:000025,EXONT:000026,EXONT:000038,EXONT:000039,EXONT:000040,EXONT:000041
EXONT:000050	Polypeptide_zinc_ion_contact_site	SO	SO:0001103	EXONT:000001,EXONT:000005,EXONT:000007,EXONT:000025,EXONT:000026,EXONT:000038,EXONT:000039,EXONT:000040,EXONT:000041
EXONT:000062	Nucleotide_binding_site	SO	SO:0001655	EXONT:000001,EXONT:000005
EXONT:000063	DNA_binding_site	SO	SO:0001429	EXONT:000001,EXONT:000005,EXONT:000062
EXONT:000073	Zinc_finger_binding_site	SO	SO:0001971	EXONT:000001,EXONT:000005,EXONT:000062,EXONT:000063
EXONT:000075	Polypeptide_DNA_contact	SO	SO:0100020	EXONT:000001,EXONT:000005,EXONT:000007,EXONT:000025,EXONT:000026,EXONT:000040,EXONT:000041,EXONT:000062,EXONT:000063
EXONT:001885	Protein binding	GO_molecular_function	GO:0005515	EXONT:000001,EXONT:000005
EXONT:001886	C2 domain	IPR_Domain	IPR000008	EXONT:000001,EXONT:000005,EXONT:001885
EXONT:001928	Organic cyclic compound binding	GO_molecular_function	GO:0097159	EXONT:000001,EXONT:000005
EXONT:001929	Nucleic acid binding	GO_molecular_function	GO:0003676	EXONT:000001,EXONT:000005,EXONT:001928,EXONT:001932
EXONT:001930	DNA binding	GO_molecular_function	GO:0003677	EXONT:000001,EXONT:000005,EXONT:001928,EXONT:001929,EXONT:001932
EXONT:001931	Helix-turn-helix motif	IPR_Site	IPR000047	EXONT:000001,EXONT:000005,EXONT:001928,EXONT:001929,EXONT:001930,EXONT:001932
EXONT:001932	Heterocyclic compound binding	GO_molecular_function	GO:1901363	EXONT:000001,EXONT:000005
EXONT:001933	IQ motif, EF-hand binding site	IPR_Site	IPR000048	EXONT:000001,EXONT:000005,EXONT:001885
EXONT:001937	Ion binding	GO_molecular_function	GO:0043167	EXONT:000001,EXONT:000005
EXONT:001938	Cation binding	GO_molecular_function	GO:0043169	EXONT:000001,EXONT:000005,EXONT:001937
EXONT:001939	Metal ion binding	GO_molecular_function	GO:0046872	EXONT:000001,EXONT:000005,EXONT:001937,EXONT:001938
EXONT:001940	Transition metal ion binding	GO_molecular_function	GO:0046914	EXONT:000001,EXONT:000005,EXONT:001937,EXONT:001938,EXONT:001939
EXONT:001941	Zinc ion binding	GO_molecular_function	GO:0008270	EXONT:000001,EXONT:000005,EXONT:001937,EXONT:001938,EXONT:001939,EXONT:001940
EXONT:001942	Zinc finger, AN1-type	IPR_Domain	IPR000058	EXONT:000001,EXONT:000005,EXONT:001937,EXONT:001938,EXONT:001939,EXONT:001940,EXONT:001941
EXONT:001945	NUDIX hydrolase, NudL, conserved site	IPR_Site	IPR000059	EXONT:000001,EXONT:000002,EXONT:000005,EXONT:001893,EXONT:001937,EXONT:001938,EXONT:001939,EXONT:001940,EXONT:001943,EXONT:001944,EXONT:001946,EXONT:001947
EXONT:001946	Magnesium ion binding	GO_molecular_function	GO:0000287	EXONT:000001,EXONT:000005,EXONT:001937,EXONT:001938,EXONT:001939
EXONT:001947	Manganese ion binding	GO_molecular_function	GO:0030145	EXONT:000001,EXONT:000005,EXONT:001937,EXONT:001938,EXONT:001939,EXONT:001940
EXONT:001948	RNA binding	GO_molecular_function	GO:0003723	EXONT:000001,EXONT:000005,EXONT:001928,EXONT:001929,EXONT:001932
EXONT:001949	SWAP/Surp	IPR_Domain	IPR000061	EXONT:000001,EXONT:000005,EXONT:001928,EXONT:001929,EXONT:001932,EXONT:001948
EXONT:001963	Receptor binding	GO_molecular_function	GO:0005102	EXONT:000001,EXONT:000005,EXONT:001885
EXONT:001964	Growth factor activity	GO_molecular_function	GO:0008083	EXONT:000001,EXONT:000005,EXONT:001885,EXONT:001963
EXONT:001965	PDGF/VEGF domain	IPR_Domain	IPR000072	EXONT:000001,EXONT:000005,EXONT:001885,EXONT:001963,EXONT:001964
EXONT:001982	Ubiquitin-activating enzyme repeat	IPR_Repeat	IPR000127	EXONT:000001,EXONT:000002,EXONT:000005,EXONT:000007,EXONT:000025,EXONT:000027,EXONT:001928,EXONT:001932,EXONT:001937,EXONT:001983,EXONT:001984,EXONT:001985,EXONT:001986,EXONT:001987,EXONT:001988,EXONT:001989,EXONT:001990,EXONT:001991,EXONT:001992,EXONT:001993,EXONT:001994,EXONT:001995,EXONT:001996,EXONT:001997,EXONT:001998,EXONT:001999
EXONT:001984	Anion binding	GO_molecular_function	GO:0043168	EXONT:000001,EXONT:000005,EXONT:001937
EXONT:001985	Purine ribonucleoside triphosphate binding	GO_molecular_function	GO:0035639	EXONT:000001,EXONT:000005,EXONT:001928,EXONT:001932,EXONT:001937,EXONT:001984,EXONT:001987
EXONT:001986	ATP binding	GO_molecular_function	GO:0005524	EXONT:000001,EXONT:000005,EXONT:001928,EXONT:001932,EXONT:001937,EXONT:001984,EXONT:001985,EXONT:001987,EXONT:001988,EXONT:001989,EXONT:001990,EXONT:001991,EXONT:001992,EXONT:001993,EXONT:001994,EXONT:001995,EXONT:001996,EXONT:001997,EXONT:001998,EXONT:001999
EXONT:001987	Nucleoside phosphate binding	GO_molecular_function	GO:1901265	EXONT:000001,EXONT:000005,EXONT:001928,EXONT:001932
EXONT:001988	Small molecule binding	GO_molecular_function	GO:0036094	EXONT:000001,EXONT:000005
EXONT:001989	Nucleoside binding	GO_molecular_function	GO:0001882	EXONT:000001,EXONT:000005,EXONT:001928,EXONT:001932,EXONT:001988,EXONT:001992
EXONT:001990	Purine nucleoside binding	GO_molecular_function	GO:0001883	EXONT:000001,EXONT:000005,EXONT:001928,EXONT:001932,EXONT:001988,EXONT:001989,EXONT:001992
EXONT:001991	Purine ribonucleoside binding	GO_molecular_function	GO:0032550	EXONT:000001,EXONT:000005,EXONT:001928,EXONT:001932,EXONT:001988,EXONT:001989,EXONT:001990,EXONT:001992,EXONT:001993
EXONT:001992	Carbohydrate derivative binding	GO_molecular_function	GO:0097367	EXONT:000001,EXONT:000005
EXONT:001993	Ribonucleoside binding	GO_molecular_function	GO:0032549	EXONT:000001,EXONT:000005,EXONT:001928,EXONT:001932,EXONT:001988,EXONT:001989,EXONT:001992
EXONT:001994	Ribonucleotide binding	GO_molecular_function	GO:0032553	EXONT:000001,EXONT:000005,EXONT:001928,EXONT:001932,EXONT:001987,EXONT:001988,EXONT:001992,EXONT:001997
EXONT:001995	Purine ribonucleotide binding	GO_molecular_function	GO:0032555	EXONT:000001,EXONT:000005,EXONT:001928,EXONT:001932,EXONT:001987,EXONT:001988,EXONT:001992,EXONT:001994,EXONT:001997,EXONT:001998
EXONT:001996	Adenyl ribonucleotide binding	GO_molecular_function	GO:0032559	EXONT:000001,EXONT:000005,EXONT:001928,EXONT:001932,EXONT:001987,EXONT:001988,EXONT:001992,EXONT:001994,EXONT:001995,EXONT:001997,EXONT:001998,EXONT:001999
EXONT:001997	Nucleotide binding	GO_molecular_function	GO:0000166	EXONT:000001,EXONT:000005,EXONT:001928,EXONT:001932,EXONT:001987,EXONT:001988
EXONT:001998	Purine nucleotide binding	GO_molecular_function	GO:0017076	EXONT:000001,EXONT:000005,EXONT:001928,EXONT:001932,EXONT:001987,EXONT:001988,EXONT:001997
EXONT:001999	Adenyl nucleotide binding	GO_molecular_function	GO:0030554	EXONT:000001,EXONT:000005,EXONT:001928,EXONT:001932,EXONT:001987,EXONT:001988,EXONT:001997,EXONT:001998
EXONT:002010	Toll/interleukin-1 receptor homology (TIR) domain	IPR_Domain	IPR000157	EXONT:000001,EXONT:000005,EXONT:001885
EXONT:002016	Glucose-methanol-choline oxidoreductase, N-terminal	IPR_Domain	IPR000172	EXONT:000001,EXONT:000002,EXONT:000005,EXONT:001912,EXONT:001928,EXONT:001932,EXONT:001937,EXONT:001984,EXONT:001987,EXONT:001988,EXONT:001997,EXONT:002015,EXONT:002017,EXONT:002018,EXONT:002019
EXONT:002017	Flavin adenine dinucleotide binding	GO_molecular_function	GO:0050660	EXONT:000001,EXONT:000005,EXONT:001928,EXONT:001932,EXONT:001937,EXONT:001984,EXONT:001987,EXONT:001988,EXONT:001997,EXONT:002018,EXONT:002019
EXONT:002018	Cofactor binding	GO_molecular_function	GO:0048037	EXONT:000001,EXONT:000005
EXONT:002019	Coenzyme binding	GO_molecular_function	GO:0050662	EXONT:000001,EXONT:000005,EXONT:002018
EXONT:002020	Apple domain	IPR_Domain	IPR000177	EXONT:000001,EXONT:000005,EXONT:000011,EXONT:001885,EXONT:002021,EXONT:002022
EXONT:002038	Hormone activity	GO_molecular_function	GO:0005179	EXONT:000001,EXONT:000005,EXONT:001885,EXONT:001963
EXONT:002039	Corticotropin-releasing factor, CRF	IPR_Domain	IPR000187	EXONT:000001,EXONT:000005,EXONT:001885,EXONT:001963,EXONT:002038
EXONT:002045	ATPase, F1/V1/A1 complex, alpha/beta subunit, nucleotide-binding domain	IPR_Domain	IPR000194	EXONT:000001,EXONT:000005,EXONT:001928,EXONT:001932,EXONT:001937,EXONT:001984,EXONT:001985,EXONT:001986,EXONT:001987,EXONT:001988,EXONT:001989,EXONT:001990,EXONT:001991,EXONT:001992,EXONT:001993,EXONT:001994,EXONT:001995,EXONT:001996,EXONT:001997,EXONT:001998,EXONT:001999
EXONT:002058	Transcription cofactor activity	GO_molecular_function	GO:0003712	EXONT:000001,EXONT:000005,EXONT:000015
EXONT:002059	Zinc finger, TAZ-type	IPR_Domain	IPR000197	EXONT:000001,EXONT:000002,EXONT:000005,EXONT:000015,EXONT:001904,EXONT:001937,EXONT:001938,EXONT:001939,EXONT:001940,EXONT:001941,EXONT:002032,EXONT:002033,EXONT:002034,EXONT:002035,EXONT:002036,EXONT:002058,EXONT:002060,EXONT:002061
EXONT:002077	BTB/POZ-like	IPR_Domain	IPR000210	EXONT:000001,EXONT:000005,EXONT:000011,EXONT:001885,EXONT:002076
EXONT:002080	Zinc finger, DNA glycosylase/AP lyase-type	IPR_Domain	IPR000214	EXONT:000001,EXONT:000002,EXONT:000005,EXONT:001893,EXONT:001920,EXONT:001921,EXONT:001937,EXONT:001938,EXONT:001939,EXONT:001940,EXONT:001941,EXONT:001957,EXONT:002003,EXONT:002078,EXONT:002079,EXONT:002081,EXONT:002082,EXONT:002083,EXONT:002084
EXONT:002085	GDP binding	GO_molecular_function	GO:0019003	EXONT:000001,EXONT:000005,EXONT:001928,EXONT:001932,EXONT:001937,EXONT:001984,EXONT:001987,EXONT:001988,EXONT:001989,EXONT:001990,EXONT:001991,EXONT:001992,EXONT:001993,EXONT:001994,EXONT:001995,EXONT:001997,EXONT:001998,EXONT:002090,EXONT:002091
EXONT:002086	Guanyl-nucleotide exchange factor activity	GO_molecular_function	GO:0005085	EXONT:000001,EXONT:000005,EXONT:001928,EXONT:001932,EXONT:001937,EXONT:001984,EXONT:001987,EXONT:001988,EXONT:001989,EXONT:001990,EXONT:001991,EXONT:001992,EXONT:001993,EXONT:001994,EXONT:001995,EXONT:001997,EXONT:001998,EXONT:002085,EXONT:002090,EXONT:002091
EXONT:002087	Ras guanyl-nucleotide exchange factor activity	GO_molecular_function	GO:0005088	EXONT:000001,EXONT:000005,EXONT:001928,EXONT:001932,EXONT:001937,EXONT:001984,EXONT:001987,EXONT:001988,EXONT:001989,EXONT:001990,EXONT:001991,EXONT:001992,EXONT:001993,EXONT:001994,EXONT:001995,EXONT:001997,EXONT:001998,EXONT:002085,EXONT:002086,EXONT:002090,EXONT:002091
EXONT:002088	Rho guanyl-nucleotide exchange factor activity	GO_molecular_function	GO:0005089	EXONT:000001,EXONT:000005,EXONT:001928,EXONT:001932,EXONT:001937,EXONT:001984,EXONT:001987,EXONT:001988,EXONT:001989,EXONT:001990,EXONT:001991,EXONT:001992,EXONT:001993,EXONT:001994,EXONT:001995,EXONT:001997,EXONT:001998,EXONT:002085,EXONT:002086,EXONT:002087,EXONT:002090,EXONT:002091
EXONT:002089	Dbl homology (DH) domain	IPR_Domain	IPR000219	EXONT:000001,EXONT:000005,EXONT:001928,EXONT:001932,EXONT:001937,EXONT:001984,EXONT:001987,EXONT:001988,EXONT:001989,EXONT:001990,EXONT:001991,EXONT:001992,EXONT:001993,EXONT:001994,EXONT:001995,EXONT:001997,EXONT:001998,EXONT:002085,EXONT:002086,EXONT:002087,EXONT:002088,EXONT:002090,EXONT:002091
EXONT:002090	Guanyl ribonucleotide binding	GO_molecular_function	GO:0032561	EXONT:000001,EXONT:000005,EXONT:001928,EXONT:001932,EXONT:001987,EXONT:001988,EXONT:001992,EXONT:001994,EXONT:001995,EXONT:001997,EXONT:001998,EXONT:002091
EXONT:002091	Guanyl nucleotide binding	GO_molecular_function	GO:0019001	EXONT:000001,EXONT:000005,EXONT:001928,EXONT:001932,EXONT:001987,EXONT:001988,EXONT:001997,EXONT:001998
EXONT:002092	Protein phosphatase 2C, manganese/magnesium aspartate binding site	IPR_Site	IPR000222	EXONT:000001,EXONT:000002,EXONT:000005,EXONT:001893,EXONT:001957,EXONT:002093,EXONT:002094,EXONT:002095,EXONT:002096
EXONT:002097	Armadillo	IPR_Repeat	IPR000225	EXONT:000001,EXONT:000005,EXONT:000007,EXONT:000025,EXONT:000027,EXONT:001885
EXONT:002098	Heat shock factor (HSF)-type, DNA-binding	IPR_Domain	IPR000232	EXONT:000001,EXONT:000005,EXONT:000011,EXONT:000014,EXONT:001928,EXONT:001929,EXONT:001930,EXONT:001932,EXONT:002099,EXONT:002100
EXONT:002100	Sequence-specific DNA binding	GO_molecular_function	GO:0043565	EXONT:000001,EXONT:000005,EXONT:001928,EXONT:001929,EXONT:001930,EXONT:001932
EXONT:002101	Calcium ion binding	GO_molecular_function	GO:0005509	EXONT:000001,EXONT:000005,EXONT:001937,EXONT:001938,EXONT:001939
EXONT:002102	Cadherin, cytoplasmic domain	IPR_Domain	IPR000233	EXONT:000001,EXONT:000005,EXONT:001937,EXONT:001938,EXONT:001939,EXONT:002101
EXONT:002103	GRIP	IPR_Domain	IPR000237	EXONT:000001,EXONT:000005,EXONT:001885
EXONT:002109	Forkhead-associated (FHA) domain	IPR_Domain	IPR000253	EXONT:000001,EXONT:000005,EXONT:001885,EXONT:002110
EXONT:002110	SMAD/FHA domain	IPR_Domain	IPR008984	EXONT:000001,EXONT:000005,EXONT:001885
EXONT:002113	Pattern binding	GO_molecular_function	GO:0001871	EXONT:000001,EXONT:000005
EXONT:002114	Polysaccharide binding	GO_molecular_function	GO:0030247	EXONT:000001,EXONT:000005,EXONT:002113,EXONT:002116
EXONT:002116	Carbohydrate binding	GO_molecular_function	GO:0030246	EXONT:000001,EXONT:000005
EXONT:002129	EPS15 homology (EH)	IPR_Domain	IPR000261	EXONT:000001,EXONT:000005,EXONT:001885
EXONT:002132	Phox/Bem1p	IPR_Domain	IPR000270	EXONT:000001,EXONT:000005,EXONT:001885
EXONT:002138	Gamma-carboxyglutamic acid-rich (GLA) domain	IPR_Domain	IPR000294	EXONT:000001,EXONT:000005,EXONT:001937,EXONT:001938,EXONT:001939,EXONT:002101
EXONT:002149	FYVE zinc finger	IPR_Domain	IPR000306	EXONT:000001,EXONT:000005,EXONT:000011,EXONT:001937,EXONT:001938,EXONT:001939,EXONT:002147,EXONT:002148
EXONT:002153	Zinc finger, B-box	IPR_Domain	IPR000315	EXONT:000001,EXONT:000005,EXONT:001937,EXONT:001938,EXONT:001939,EXONT:001940,EXONT:001941
EXONT:002160	NADP binding	GO_molecular_function	GO:0050661	EXONT:000001,EXONT:000005,EXONT:001928,EXONT:001932,EXONT:001987,EXONT:001988,EXONT:001997,EXONT:002018,EXONT:002019
EXONT:002168	Copper type II, ascorbate-dependent monooxygenase, N-terminal	IPR_Domain	IPR000323	EXONT:000001,EXONT:000002,EXONT:000005,EXONT:001912,EXONT:001937,EXONT:001938,EXONT:001939,EXONT:001940,EXONT:002167,EXONT:002169,EXONT:002170,EXONT:002171
EXONT:002171	Copper ion binding	GO_molecular_function	GO:0005507	EXONT:000001,EXONT:000005,EXONT:001937,EXONT:001938,EXONT:001939,EXONT:001940
EXONT:002173	POU-specific	IPR_Domain	IPR000327	EXONT:000001,EXONT:000005,EXONT:000014
EXONT:002175	SNF2-related	IPR_Domain	IPR000330	EXONT:000001,EXONT:000005,EXONT:001928,EXONT:001929,EXONT:001930,EXONT:001932,EXONT:001937,EXONT:001984,EXONT:001985,EXONT:001986,EXONT:001987,EXONT:001988,EXONT:001989,EXONT:001990,EXONT:001991,EXONT:001992,EXONT:001993,EXONT:001994,EXONT:001995,EXONT:001996,EXONT:001997,EXONT:001998,EXONT:001999
EXONT:002188	Translation factor activity, nucleic acid binding	GO_molecular_function	GO:0008135	EXONT:000001,EXONT:000005,EXONT:001928,EXONT:001929,EXONT:001932,EXONT:001948
EXONT:002189	Translation termination factor activity	GO_molecular_function	GO:0008079	EXONT:000001,EXONT:000005,EXONT:001928,EXONT:001929,EXONT:001932,EXONT:001948,EXONT:002188
EXONT:002190	Translation release factor activity	GO_molecular_function	GO:0003747	EXONT:000001,EXONT:000005,EXONT:001928,EXONT:001929,EXONT:001932,EXONT:001948,EXONT:002188,EXONT:002189
EXONT:002191	Peptide chain release factor class I/class II	IPR_Domain	IPR000352	EXONT:000001,EXONT:000005,EXONT:001928,EXONT:001929,EXONT:001932,EXONT:001948,EXONT:002188,EXONT:002189,EXONT:002190
EXONT:002196	HEAT	IPR_Repeat	IPR000357	EXONT:000001,EXONT:000005,EXONT:000007,EXONT:000025,EXONT:000027,EXONT:001885
EXONT:002200	GTP binding	GO_molecular_function	GO:0005525	EXONT:000001,EXONT:000005,EXONT:001928,EXONT:001932,EXONT:001937,EXONT:001984,EXONT:001985,EXONT:001987,EXONT:001988,EXONT:001989,EXONT:001990,EXONT:001991,EXONT:001992,EXONT:001993,EXONT:001994,EXONT:001995,EXONT:001997,EXONT:001998,EXONT:002090,EXONT:002091
EXONT:002201	Dynamin central domain	IPR_Domain	IPR000375	EXONT:000001,EXONT:000005,EXONT:001928,EXONT:001932,EXONT:001937,EXONT:001984,EXONT:001985,EXONT:001987,EXONT:001988,EXONT:001989,EXONT:001990,EXONT:001991,EXONT:001992,EXONT:001993,EXONT:001994,EXONT:001995,EXONT:001997,EXONT:001998,EXONT:002090,EXONT:002091,EXONT:002200
EXONT:002204	MoaA/nifB/pqqE, iron-sulphur binding, conserved site	IPR_Site	IPR000385	EXONT:000001,EXONT:000002,EXONT:000005,EXONT:001937,EXONT:001938,EXONT:001939,EXONT:002205,EXONT:002206,EXONT:002207
EXONT:002205	Metal cluster binding	GO_molecular_function	GO:0051540	EXONT:000001,EXONT:000005
EXONT:002206	Iron-sulfur cluster binding	GO_molecular_function	GO:0051536	EXONT:000001,EXONT:000005,EXONT:002205
EXONT:002207	4 iron, 4 sulfur cluster binding	GO_molecular_function	GO:0051539	EXONT:000001,EXONT:000005,EXONT:002205,EXONT:002206
EXONT:002208	Thiamine pyrophosphate binding	GO_molecular_function	GO:0030976	EXONT:000001,EXONT:000005,EXONT:001928,EXONT:001932,EXONT:001937,EXONT:001938,EXONT:001984,EXONT:001988,EXONT:002018,EXONT:002019,EXONT:002210,EXONT:002211
EXONT:002209	TPP-binding enzyme, conserved site	IPR_Site	IPR000399	EXONT:000001,EXONT:000005,EXONT:001928,EXONT:001932,EXONT:001937,EXONT:001938,EXONT:001939,EXONT:001946,EXONT:001984,EXONT:001988,EXONT:002018,EXONT:002019,EXONT:002208,EXONT:002210,EXONT:002211
EXONT:002210	Sulfur compound binding	GO_molecular_function	GO:1901681	EXONT:000001,EXONT:000005
EXONT:002211	Vitamin binding	GO_molecular_function	GO:0019842	EXONT:000001,EXONT:000005,EXONT:001988
EXONT:002220	Ets domain	IPR_Domain	IPR000418	EXONT:000001,EXONT:000005,EXONT:000011,EXONT:000014,EXONT:001928,EXONT:001929,EXONT:001930,EXONT:001932,EXONT:002099,EXONT:002100
EXONT:002226	DNA mismatch repair protein MutS, C-terminal	IPR_Domain	IPR000432	EXONT:000001,EXONT:000005,EXONT:001928,EXONT:001929,EXONT:001930,EXONT:001932,EXONT:001937,EXONT:001984,EXONT:001985,EXONT:001986,EXONT:001987,EXONT:001988,EXONT:001989,EXONT:001990,EXONT:001991,EXONT:001992,EXONT:001993,EXONT:001994,EXONT:001995,EXONT:001996,EXONT:001997,EXONT:001998,EXONT:001999,EXONT:002227,EXONT:002228,EXONT:002229
EXONT:002227	Structure-specific DNA binding	GO_molecular_function	GO:0043566	EXONT:000001,EXONT:000005,EXONT:001928,EXONT:001929,EXONT:001930,EXONT:001932
EXONT:002228	Double-stranded DNA binding	GO_molecular_function	GO:0003690	EXONT:000001,EXONT:000005,EXONT:001928,EXONT:001929,EXONT:001930,EXONT:001932,EXONT:002227
EXONT:002229	Mismatched DNA binding	GO_molecular_function	GO:0030983	EXONT:000001,EXONT:000005,EXONT:001928,EXONT:001929,EXONT:001930,EXONT:001932,EXONT:002227,EXONT:002228
EXONT:002230	Zinc finger, ZZ-type	IPR_Domain	IPR000433	EXONT:000001,EXONT:000005,EXONT:001937,EXONT:001938,EXONT:001939,EXONT:001940,EXONT:001941
EXONT:002232	Helix-hairpin-helix motif	IPR_Site	IPR000445	EXONT:000001,EXONT:000005,EXONT:001928,EXONT:001929,EXONT:001930,EXONT:001932
EXONT:002234	Ubiquitin-associated domain/translation elongation factor EF-Ts, N-terminal	IPR_Domain	IPR000449	EXONT:000001,EXONT:000005,EXONT:001885
EXONT:002235	Cytosolic fatty-acid binding	IPR_Domain	IPR000463	EXONT:000001,EXONT:000004,EXONT:000005,EXONT:000011,EXONT:002236,EXONT:002237,EXONT:002238,EXONT:002239
EXONT:002236	Lipid binding	GO_molecular_function	GO:0008289	EXONT:000001,EXONT:000005
EXONT:002240	G-patch domain	IPR_Domain	IPR000467	EXONT:000001,EXONT:000005,EXONT:001928,EXONT:001929,EXONT:001932
EXONT:002255	Iron ion binding	GO_molecular_function	GO:0005506	EXONT:000001,EXONT:000005,EXONT:001937,EXONT:001938,EXONT:001939,EXONT:001940
EXONT:002259	Death domain	IPR_Domain	IPR000488	EXONT:000001,EXONT:000005,EXONT:000011,EXONT:001885,EXONT:002258
EXONT:002265	RNA recognition motif domain	IPR_Domain	IPR000504	EXONT:000001,EXONT:000005,EXONT:001928,EXONT:001929,EXONT:001932
EXONT:002280	Glucagon/GIP/secretin/VIP	IPR_Domain	IPR000532	EXONT:000001,EXONT:000005,EXONT:001885,EXONT:001963,EXONT:002038
EXONT:002282	NAD binding	GO_molecular_function	GO:0051287	EXONT:000001,EXONT:000005,EXONT:001928,EXONT:001932,EXONT:001987,EXONT:001988,EXONT:001997,EXONT:002018,EXONT:002019
EXONT:002285	Nuclear hormone receptor, ligand-binding, core	IPR_Domain	IPR000536	EXONT:000001,EXONT:000003,EXONT:000005,EXONT:000012,EXONT:000014,EXONT:002242,EXONT:002286
EXONT:002289	Link	IPR_Domain	IPR000538	EXONT:000001,EXONT:000005,EXONT:000011,EXONT:001992,EXONT:002287,EXONT:002288,EXONT:002290,EXONT:002291
EXONT:002290	Glycosaminoglycan binding	GO_molecular_function	GO:0005539	EXONT:000001,EXONT:000005,EXONT:001992
EXONT:002291	Hyaluronic acid binding	GO_molecular_function	GO:0005540	EXONT:000001,EXONT:000005,EXONT:001992,EXONT:002290
EXONT:002299	JAB/MPN domain	IPR_Domain	IPR000555	EXONT:000001,EXONT:000005,EXONT:001885
EXONT:002304	Zinc finger, CCCH-type	IPR_Domain	IPR000571	EXONT:000001,EXONT:000005,EXONT:001937,EXONT:001938,EXONT:001939
EXONT:002310	Acyl-CoA-binding protein, ACBP	IPR_Domain	IPR000582	EXONT:000001,EXONT:000005,EXONT:000011,EXONT:001937,EXONT:001984,EXONT:002018,EXONT:002019,EXONT:002210,EXONT:002309,EXONT:002311
EXONT:002311	Fatty-acyl-CoA binding	GO_molecular_function	GO:0000062	EXONT:000001,EXONT:000005,EXONT:001937,EXONT:001984,EXONT:002018,EXONT:002019,EXONT:002210
EXONT:002335	Double-stranded RNA-specific adenosine deaminase (DRADA)	IPR_Domain	IPR000607	EXONT:000001,EXONT:000002,EXONT:000005,EXONT:000011,EXONT:001893,EXONT:001928,EXONT:001929,EXONT:001932,EXONT:001948,EXONT:002000,EXONT:002099,EXONT:002336,EXONT:002337,EXONT:002338,EXONT:002339
EXONT:002346	Ubiquitin domain	IPR_Domain	IPR000626	EXONT:000001,EXONT:000005,EXONT:001885
EXONT:002348	Ferric iron binding	GO_molecular_function	GO:0008199	EXONT:000001,EXONT:000005,EXONT:001937,EXONT:001938,EXONT:001939,EXONT:001940,EXONT:002255
EXONT:002349	RNA helicase, ATP-dependent, DEAD-box, conserved site	IPR_Site	IPR000629	EXONT:000001,EXONT:000002,EXONT:000005,EXONT:001893,EXONT:001928,EXONT:001929,EXONT:001932,EXONT:001937,EXONT:001943,EXONT:001944,EXONT:001984,EXONT:001985,EXONT:001986,EXONT:001987,EXONT:001988,EXONT:001989,EXONT:001990,EXONT:001991,EXONT:001992,EXONT:001993,EXONT:001994,EXONT:001995,EXONT:001996,EXONT:001997,EXONT:001998,EXONT:001999,EXONT:002054,EXONT:002055,EXONT:002333,EXONT:002350,EXONT:002…
EXONT:002356	Serine/threonine dehydratase, pyridoxal-phosphate-binding site	IPR_Site	IPR000634	EXONT:000001,EXONT:000005,EXONT:001928,EXONT:001932,EXONT:001937,EXONT:001984,EXONT:002018,EXONT:002357
EXONT:002357	Pyridoxal phosphate binding	GO_molecular_function	GO:0030170	EXONT:000001,EXONT:000005,EXONT:001928,EXONT:001932,EXONT:001937,EXONT:001984,EXONT:002018
EXONT:002360	Peptidase M41	IPR_Domain	IPR000642	EXONT:000001,EXONT:000002,EXONT:000005,EXONT:001893,EXONT:001894,EXONT:001897,EXONT:001899,EXONT:001928,EXONT:001932,EXONT:001937,EXONT:001984,EXONT:001985,EXONT:001986,EXONT:001987,EXONT:001988,EXONT:001989,EXONT:001990,EXONT:001991,EXONT:001992,EXONT:001993,EXONT:001994,EXONT:001995,EXONT:001996,EXONT:001997,EXONT:001998,EXONT:001999,EXONT:002024,EXONT:002361
EXONT:002362	CBS domain	IPR_Domain	IPR000644	EXONT:000001,EXONT:000005,EXONT:001928,EXONT:001932,EXONT:001987,EXONT:001988,EXONT:001997,EXONT:001998,EXONT:001999
EXONT:002366	Ras-like guanine nucleotide exchange factor, N-terminal	IPR_Domain	IPR000651	EXONT:000001,EXONT:000005,EXONT:001928,EXONT:001932,EXONT:001937,EXONT:001984,EXONT:001987,EXONT:001988,EXONT:001989,EXONT:001990,EXONT:001991,EXONT:001992,EXONT:001993,EXONT:001994,EXONT:001995,EXONT:001997,EXONT:001998,EXONT:002085,EXONT:002086,EXONT:002090,EXONT:002091
EXONT:002375	Zinc finger, GATA-type	IPR_Domain	IPR000679	EXONT:000001,EXONT:000005,EXONT:000014,EXONT:001928,EXONT:001929,EXONT:001930,EXONT:001932,EXONT:001937,EXONT:001938,EXONT:001939,EXONT:001940,EXONT:001941,EXONT:002100
EXONT:002377	RNA polymerase II, heptapeptide repeat, eukaryotic	IPR_Repeat	IPR000684	EXONT:000001,EXONT:000005,EXONT:000007,EXONT:000025,EXONT:000027,EXONT:001928,EXONT:001929,EXONT:001930,EXONT:001932
EXONT:002379	RIO-like kinase	IPR_Domain	IPR018934	EXONT:000001,EXONT:000002,EXONT:000005,EXONT:001928,EXONT:001932,EXONT:001937,EXONT:001984,EXONT:001985,EXONT:001986,EXONT:001987,EXONT:001988,EXONT:001989,EXONT:001990,EXONT:001991,EXONT:001992,EXONT:001993,EXONT:001994,EXONT:001995,EXONT:001996,EXONT:001997,EXONT:001998,EXONT:001999
EXONT:002380	RIO kinase	IPR_Domain	IPR000687	EXONT:000001,EXONT:000002,EXONT:000005,EXONT:001904,EXONT:001905,EXONT:001906,EXONT:001910,EXONT:001928,EXONT:001932,EXONT:001937,EXONT:001984,EXONT:001985,EXONT:001986,EXONT:001987,EXONT:001988,EXONT:001989,EXONT:001990,EXONT:001991,EXONT:001992,EXONT:001993,EXONT:001994,EXONT:001995,EXONT:001996,EXONT:001997,EXONT:001998,EXONT:001999,EXONT:002248,EXONT:002249,EXONT:002379
EXONT:002381	Zinc finger, C2H2-type matrin	IPR_Domain	IPR000690	EXONT:000001,EXONT:000005,EXONT:001928,EXONT:001929,EXONT:001932,EXONT:001937,EXONT:001938,EXONT:001939,EXONT:001940,EXONT:001941,EXONT:002382
EXONT:002382	Zinc finger, U1-type	IPR_Domain	IPR003604	EXONT:000001,EXONT:000005,EXONT:001928,EXONT:001929,EXONT:001932,EXONT:001937,EXONT:001938,EXONT:001939,EXONT:001940,EXONT:001941
EXONT:002405	Proteasome component (PCI) domain	IPR_Domain	IPR000717	EXONT:000001,EXONT:000005,EXONT:001885
EXONT:002406	Protein kinase domain	IPR_Domain	IPR000719	EXONT:000001,EXONT:000002,EXONT:000005,EXONT:001904,EXONT:001905,EXONT:001906,EXONT:001910,EXONT:001928,EXONT:001932,EXONT:001937,EXONT:001984,EXONT:001985,EXONT:001986,EXONT:001987,EXONT:001988,EXONT:001989,EXONT:001990,EXONT:001991,EXONT:001992,EXONT:001993,EXONT:001994,EXONT:001995,EXONT:001996,EXONT:001997,EXONT:001998,EXONT:001999,EXONT:002212,EXONT:002248
EXONT:002407	RNA polymerase, alpha subunit	IPR_Domain	IPR000722	EXONT:000001,EXONT:000002,EXONT:000005,EXONT:001904,EXONT:001905,EXONT:001928,EXONT:001929,EXONT:001930,EXONT:001932,EXONT:002067,EXONT:002072,EXONT:002408
EXONT:002412	Target SNARE coiled-coil domain	IPR_Domain	IPR000727	EXONT:000001,EXONT:000005,EXONT:001885
EXONT:002417	WHEP-TRS	IPR_Domain	IPR000738	EXONT:000001,EXONT:000002,EXONT:000005,EXONT:000011,EXONT:001902,EXONT:001928,EXONT:001932,EXONT:001937,EXONT:001984,EXONT:001985,EXONT:001986,EXONT:001987,EXONT:001988,EXONT:001989,EXONT:001990,EXONT:001991,EXONT:001992,EXONT:001993,EXONT:001994,EXONT:001995,EXONT:001996,EXONT:001997,EXONT:001998,EXONT:001999,EXONT:002416,EXONT:002418,EXONT:002419,EXONT:002420
EXONT:002421	Epidermal growth factor-like domain	IPR_Domain	IPR000742	EXONT:000001,EXONT:000005,EXONT:001885
EXONT:002423	Homeodomain engrailed	IPR_Domain	IPR000747	EXONT:000001,EXONT:000005,EXONT:001928,EXONT:001929,EXONT:001930,EXONT:001932,EXONT:002424,EXONT:002425,EXONT:002426
EXONT:002424	Homeodomain, metazoa	IPR_Domain	IPR020479	EXONT:000001,EXONT:000005,EXONT:001928,EXONT:001929,EXONT:001930,EXONT:001932,EXONT:002425,EXONT:002426
EXONT:002425	Homeobox domain	IPR_Domain	IPR001356	EXONT:000001,EXONT:000005,EXONT:001928,EXONT:001929,EXONT:001930,EXONT:001932,EXONT:002426
EXONT:002426	Homeodomain-like	IPR_Domain	IPR009057	EXONT:000001,EXONT:000005,EXONT:001928,EXONT:001929,EXONT:001930,EXONT:001932
EXONT:002427	Double-stranded RNA binding	GO_molecular_function	GO:0003725	EXONT:000001,EXONT:000005,EXONT:001928,EXONT:001929,EXONT:001932,EXONT:001948
EXONT:002434	SAND domain	IPR_Domain	IPR000770	EXONT:000001,EXONT:000005,EXONT:000011,EXONT:001928,EXONT:001929,EXONT:001930,EXONT:001932,EXONT:002433
EXONT:002443	RNA polymerase, subunit H/Rpb5 C-terminal	IPR_Domain	IPR000783	EXONT:000001,EXONT:000002,EXONT:000005,EXONT:001904,EXONT:001905,EXONT:001928,EXONT:001929,EXONT:001930,EXONT:001932,EXONT:002067,EXONT:002072,EXONT:002408
EXONT:002449	Elongation factor, GTP-binding domain	IPR_Domain	IPR000795	EXONT:000001,EXONT:000002,EXONT:000005,EXONT:001893,EXONT:001928,EXONT:001932,EXONT:001937,EXONT:001943,EXONT:001944,EXONT:001984,EXONT:001985,EXONT:001987,EXONT:001988,EXONT:001989,EXONT:001990,EXONT:001991,EXONT:001992,EXONT:001993,EXONT:001994,EXONT:001995,EXONT:001997,EXONT:001998,EXONT:002054,EXONT:002055,EXONT:002056,EXONT:002090,EXONT:002091,EXONT:002200
EXONT:002452	Mrp, conserved site	IPR_Site	IPR000808	EXONT:000001,EXONT:000005,EXONT:001928,EXONT:001932,EXONT:001937,EXONT:001984,EXONT:001985,EXONT:001986,EXONT:001987,EXONT:001988,EXONT:001989,EXONT:001990,EXONT:001991,EXONT:001992,EXONT:001993,EXONT:001994,EXONT:001995,EXONT:001996,EXONT:001997,EXONT:001998,EXONT:001999
EXONT:002460	Cytokine activity	GO_molecular_function	GO:0005125	EXONT:000001,EXONT:000005,EXONT:001885,EXONT:001963
EXONT:002461	Chemokine activity	GO_molecular_function	GO:0008009	EXONT:000001,EXONT:000005,EXONT:001885,EXONT:001963,EXONT:002460,EXONT:002463,EXONT:002464,EXONT:002465
EXONT:002462	CC chemokine, conserved site	IPR_Site	IPR000827	EXONT:000001,EXONT:000005,EXONT:001885,EXONT:001963,EXONT:002460,EXONT:002461,EXONT:002463,EXONT:002464,EXONT:002465
EXONT:002463	G-protein coupled receptor binding	GO_molecular_function	GO:0001664	EXONT:000001,EXONT:000005,EXONT:001885,EXONT:001963
EXONT:002464	Chemokine receptor binding	GO_molecular_function	GO:0042379	EXONT:000001,EXONT:000005,EXONT:001885,EXONT:001963,EXONT:002463,EXONT:002465
EXONT:002465	Cytokine receptor binding	GO_molecular_function	GO:0005126	EXONT:000001,EXONT:000005,EXONT:001885,EXONT:001963
EXONT:002466	Peptidase M14, carboxypeptidase A	IPR_Domain	IPR000834	EXONT:000001,EXONT:000002,EXONT:000005,EXONT:001893,EXONT:001894,EXONT:001897,EXONT:001937,EXONT:001938,EXONT:001939,EXONT:001940,EXONT:001941,EXONT:002024,EXONT:002025,EXONT:002026,EXONT:002467,EXONT:002468
EXONT:002473	Phosphoribosyl pyrophosphate synthetase, conserved site	IPR_Site	IPR000842	EXONT:000001,EXONT:000002,EXONT:000005,EXONT:001904,EXONT:001905,EXONT:001937,EXONT:001938,EXONT:001939,EXONT:001946,EXONT:002294,EXONT:002474
EXONT:002476	Lambda repressor-like, DNA-binding domain	IPR_Domain	IPR010982	EXONT:000001,EXONT:000005,EXONT:001928,EXONT:001929,EXONT:001930,EXONT:001932
EXONT:002485	GPCR, cAMP-type	IPR_Domain	IPR000848	EXONT:000001,EXONT:000003,EXONT:000005,EXONT:000012,EXONT:001928,EXONT:001932,EXONT:001937,EXONT:001984,EXONT:001987,EXONT:001988,EXONT:001992,EXONT:001994,EXONT:001995,EXONT:001996,EXONT:001997,EXONT:001998,EXONT:001999,EXONT:002242,EXONT:002243,EXONT:002484,EXONT:002486,EXONT:002487,EXONT:002488
EXONT:002487	CAMP binding	GO_molecular_function	GO:0030552	EXONT:000001,EXONT:000005,EXONT:001928,EXONT:001932,EXONT:001937,EXONT:001984,EXONT:001987,EXONT:001988,EXONT:001992,EXONT:001994,EXONT:001995,EXONT:001996,EXONT:001997,EXONT:001998,EXONT:001999,EXONT:002488
EXONT:002488	Cyclic nucleotide binding	GO_molecular_function	GO:0030551	EXONT:000001,EXONT:000005,EXONT:001928,EXONT:001932,EXONT:001987,EXONT:001988,EXONT:001997
EXONT:002497	Growth factor binding	GO_molecular_function	GO:0019838	EXONT:000001,EXONT:000005,EXONT:001885
EXONT:002498	Insulin-like growth factor binding	GO_molecular_function	GO:0005520	EXONT:000001,EXONT:000005,EXONT:001885,EXONT:002497
EXONT:002499	Insulin-like growth factor-binding protein, IGFBP	IPR_Domain	IPR000867	EXONT:000001,EXONT:000005,EXONT:001885,EXONT:002497,EXONT:002498
EXONT:002511	Signal recognition particle, SRP54 subunit, GTPase domain	IPR_Domain	IPR000897	EXONT:000001,EXONT:000005,EXONT:000011,EXONT:001928,EXONT:001932,EXONT:001937,EXONT:001984,EXONT:001985,EXONT:001987,EXONT:001988,EXONT:001989,EXONT:001990,EXONT:001991,EXONT:001992,EXONT:001993,EXONT:001994,EXONT:001995,EXONT:001997,EXONT:001998,EXONT:002090,EXONT:002091,EXONT:002200,EXONT:002271,EXONT:002272
EXONT:002513	ARF guanyl-nucleotide exchange factor activity	GO_molecular_function	GO:0005086	EXONT:000001,EXONT:000005,EXONT:001928,EXONT:001932,EXONT:001937,EXONT:001984,EXONT:001987,EXONT:001988,EXONT:001989,EXONT:001990,EXONT:001991,EXONT:001992,EXONT:001993,EXONT:001994,EXONT:001995,EXONT:001997,EXONT:001998,EXONT:002085,EXONT:002086,EXONT:002090,EXONT:002091
EXONT:002514	Sec7 domain	IPR_Domain	IPR000904	EXONT:000001,EXONT:000005,EXONT:001928,EXONT:001932,EXONT:001937,EXONT:001984,EXONT:001987,EXONT:001988,EXONT:001989,EXONT:001990,EXONT:001991,EXONT:001992,EXONT:001993,EXONT:001994,EXONT:001995,EXONT:001997,EXONT:001998,EXONT:002085,EXONT:002086,EXONT:002090,EXONT:002091,EXONT:002513
EXONT:002524	D-galactoside/L-rhamnose binding SUEL lectin domain	IPR_Domain	IPR000922	EXONT:000001,EXONT:000005,EXONT:002116
EXONT:002546	POLO box duplicated domain	IPR_Domain	IPR000959	EXONT:000001,EXONT:000005,EXONT:001885
EXONT:002547	AGC-kinase, C-terminal	IPR_Domain	IPR000961	EXONT:000001,EXONT:000002,EXONT:000005,EXONT:001904,EXONT:001905,EXONT:001906,EXONT:001910,EXONT:001928,EXONT:001932,EXONT:001937,EXONT:001984,EXONT:001985,EXONT:001986,EXONT:001987,EXONT:001988,EXONT:001989,EXONT:001990,EXONT:001991,EXONT:001992,EXONT:001993,EXONT:001994,EXONT:001995,EXONT:001996,EXONT:001997,EXONT:001998,EXONT:001999,EXONT:002248,EXONT:002249
EXONT:002553	Zinc finger, NF-X1-type	IPR_Domain	IPR000967	EXONT:000001,EXONT:000005,EXONT:000014,EXONT:001937,EXONT:001938,EXONT:001939,EXONT:001940,EXONT:001941
EXONT:002557	SH2 domain	IPR_Domain	IPR000980	EXONT:000001,EXONT:000005,EXONT:001885
EXONT:002561	Ribonuclease III domain	IPR_Domain	IPR000999	EXONT:000001,EXONT:000002,EXONT:000005,EXONT:001893,EXONT:001928,EXONT:001929,EXONT:001932,EXONT:001948,EXONT:001957,EXONT:002081,EXONT:002082,EXONT:002562,EXONT:002563,EXONT:002564,EXONT:002565,EXONT:002566,EXONT:002567
EXONT:002568	Chitin binding	GO_molecular_function	GO:0008061	EXONT:000001,EXONT:000005,EXONT:001992
EXONT:002569	Chitin-binding, type 1	IPR_Domain	IPR001002	EXONT:000001,EXONT:000005,EXONT:001992,EXONT:002568
EXONT:002571	Chromatin binding	GO_molecular_function	GO:0003682	EXONT:000001,EXONT:000005
EXONT:002572	SANT/Myb domain	IPR_Domain	IPR001005	EXONT:000001,EXONT:000005,EXONT:001928,EXONT:001929,EXONT:001930,EXONT:001932,EXONT:002426,EXONT:002571
EXONT:002573	Von Willebrand factor, type C	IPR_Domain	IPR001007	EXONT:000001,EXONT:000005,EXONT:001885
EXONT:002574	UBX	IPR_Domain	IPR001012	EXONT:000001,EXONT:000005,EXONT:001885
EXONT:002583	PLAT/LH2 domain	IPR_Domain	IPR001024	EXONT:000001,EXONT:000005,EXONT:000011,EXONT:001885,EXONT:002582
EXONT:002584	Bromo adjacent homology (BAH) domain	IPR_Domain	IPR001025	EXONT:000001,EXONT:000005,EXONT:002571
EXONT:002595	2Fe-2S ferredoxin-type domain	IPR_Domain	IPR001041	EXONT:000001,EXONT:000004,EXONT:000005,EXONT:000011,EXONT:000013,EXONT:002205,EXONT:002206,EXONT:002596
EXONT:002602	Translation elongation factor activity	GO_molecular_function	GO:0003746	EXONT:000001,EXONT:000005,EXONT:001928,EXONT:001929,EXONT:001932,EXONT:001948,EXONT:002188
EXONT:002607	NIF system FeS cluster assembly, NifU, C-terminal	IPR_Domain	IPR001075	EXONT:000001,EXONT:000005,EXONT:001937,EXONT:001938,EXONT:001939,EXONT:001940,EXONT:002205,EXONT:002206,EXONT:002255
EXONT:002611	Galectin, carbohydrate recognition domain	IPR_Domain	IPR001079	EXONT:000001,EXONT:000005,EXONT:000011,EXONT:002116,EXONT:002431
EXONT:002613	Microtubule associated protein, tubulin-binding repeat	IPR_Repeat	IPR001084	EXONT:000001,EXONT:000005,EXONT:000007,EXONT:000025,EXONT:000027,EXONT:001885,EXONT:002614,EXONT:002615
EXONT:002614	Cytoskeletal protein binding	GO_molecular_function	GO:0008092	EXONT:000001,EXONT:000005,EXONT:001885
EXONT:002615	Tubulin binding	GO_molecular_function	GO:0015631	EXONT:000001,EXONT:000005,EXONT:001885,EXONT:002614
EXONT:002622	DNA-directed DNA polymerase, family A, palm domain	IPR_Domain	IPR001098	EXONT:000001,EXONT:000002,EXONT:000005,EXONT:001904,EXONT:001905,EXONT:001928,EXONT:001929,EXONT:001930,EXONT:001932,EXONT:002067,EXONT:002068,EXONT:002069
EXONT:002629	Transforming growth factor-beta, N-terminal	IPR_Domain	IPR001111	EXONT:000001,EXONT:000005,EXONT:001885,EXONT:001963,EXONT:001964
EXONT:002633	Lipid-binding serum glycoprotein, C-terminal	IPR_Domain	IPR001124	EXONT:000001,EXONT:000005,EXONT:002236,EXONT:002634
EXONT:002634	Bactericidal permeability-increasing protein, alpha/beta domain	IPR_Domain	IPR017943	EXONT:000001,EXONT:000005,EXONT:002236
EXONT:002635	Damaged DNA binding	GO_molecular_function	GO:0003684	EXONT:000001,EXONT:000005,EXONT:001928,EXONT:001929,EXONT:001930,EXONT:001932
EXONT:002636	DNA-repair protein, UmuC-like	IPR_Domain	IPR001126	EXONT:000001,EXONT:000002,EXONT:000005,EXONT:001904,EXONT:001905,EXONT:001928,EXONT:001929,EXONT:001930,EXONT:001932,EXONT:002067,EXONT:002068,EXONT:002069,EXONT:002635
EXONT:002640	SMAD domain-like	IPR_Domain	IPR017855	EXONT:000001,EXONT:000005,EXONT:001885,EXONT:002110
EXONT:002641	SMAD domain, Dwarfin-type	IPR_Domain	IPR001132	EXONT:000001,EXONT:000005,EXONT:001885,EXONT:002110,EXONT:002640
[truncated: 1,142 more rows]

## Sheet: Localization
EO identifier	Eo name	External database	External identifier	EO ancestors
[truncated: 14 more rows]

[truncated: 4 more sheets: Structure, PTM, Unclassified, EXONT terms used for Z-score]
