# Supplementary material for: Identification of protein features encoded by alternative exons using Exon Ontology
Source: Genome Res. 2017 Jun;27(6):1087–97. doi: 10.1101/gr.212696.116 (PMC5453322; doi:10.1101/gr.212696.116)
Supplement: Supplemental Material [file supp_gr.212696.116_Supplemental_Table_S3.xlsx]

## Sheet: Summary
Supplemental Table S3: Scores of exon ontology terms in exon categories
Sheet 1: Annotated exon numbers
Sheet 2: Annotations per exon category
Sheet 3: First Coding Exons vs ALL
Sheet 4: Internal Coding Exons vs ALL
Sheet 5: Last Coding Exons vs ALL
Sheet 6: Alternatively Spliced Exons (ASE) vs Constitutive Exons (CE).

## Sheet: Annotated exon numbers
EO full id	EO name	External source	EO categories	Nb associated exons
EXONT:000016	Peroxisome targeting signal		EXONT:000006	2145
EXONT:000017	Cilia targeting sequence		EXONT:000006	2095
EXONT:000019	Signal_peptide	SO	EXONT:000006	3683
EXONT:000020	Transit_peptide	SO	EXONT:000006	630
EXONT:000022	Polypeptide_turn_motif	SO	EXONT:000007	8940
EXONT:000024	Compositionally_biased_region_of_peptide	SO	EXONT:000007	7525
EXONT:000027	Polypeptide_repeat	SO	EXONT:000007	10273
EXONT:000032	Intramembrane_polypeptide_region	SO	EXONT:000006,EXONT:000007	221
EXONT:000033	Transmembrane_polypeptide_region	SO	EXONT:000006,EXONT:000007	24
EXONT:000035	Coiled_coil	SO	EXONT:000007	7064
EXONT:000037	Peptide_helix	SO	EXONT:000007	21917
EXONT:000039	Polypeptide_metal_contact	SO	EXONT:000005,EXONT:000007	216
EXONT:000042	Polypeptide_calcium_ion_contact_site	SO	EXONT:000005,EXONT:000007	896
EXONT:000043	Polypeptide_cobalt_ion_contact_site	SO	EXONT:000005,EXONT:000007	7
EXONT:000044	Polypeptide_copper_ion_contact_site	SO	EXONT:000005,EXONT:000007	81
EXONT:000045	Polypeptide_iron_ion_contact_site	SO	EXONT:000005,EXONT:000007	457
EXONT:000046	Polypeptide_magnesium_ion_contact_site	SO	EXONT:000005,EXONT:000007	433
EXONT:000047	Polypeptide_manganese_ion_contact_site	SO	EXONT:000005,EXONT:000007	218
EXONT:000048	Polypeptide_molybdenum_ion_contact_site	SO	EXONT:000005,EXONT:000007	5
EXONT:000049	Polypeptide_nickel_ion_contact_site	SO	EXONT:000005,EXONT:000007	2
EXONT:000050	Polypeptide_zinc_ion_contact_site	SO	EXONT:000005,EXONT:000007	926
EXONT:000051	Beta_strand	SO	EXONT:000007	18776
EXONT:000062	Nucleotide_binding_site	SO	EXONT:000005	3017
EXONT:000064	Nuclear_localization_signal	SO	EXONT:000006	25503
EXONT:000065	Endosomal_localization_signal	SO	EXONT:000006	1573
EXONT:000066	Lysosomal_localization_signal	SO	EXONT:000006	1573
EXONT:000067	Nuclear_export_signal	SO	EXONT:000006	12563
EXONT:000069	ER_retention_signal	SO	EXONT:000006	2431
EXONT:000071	Transmembrane_helix	SO	EXONT:000006,EXONT:000007	15794
EXONT:000073	Zinc_finger_binding_site	SO	EXONT:000005	3211
EXONT:000074	Intrinsically_unstructured_polypeptide_region	SO	EXONT:000007	57431
EXONT:000075	Polypeptide_DNA_contact	SO	EXONT:000005,EXONT:000007	1109
EXONT:000077	Modified L-serine residue	PSI-MOD	EXONT:000008	2
EXONT:000078	O-glycosyl-L-serine	PSI-MOD	EXONT:000008	278
EXONT:000081	O-glycosylated residue	PSI-MOD	EXONT:000008	30
EXONT:000083	O-glycosyl-L-threonine	PSI-MOD	EXONT:000008	230
EXONT:000084	N-glycosylated residue	PSI-MOD	EXONT:000008	44
EXONT:000121	L-cystine (cross-link)	PSI-MOD	EXONT:000008	9698
EXONT:000122	Modified L-cysteine residue	PSI-MOD	EXONT:000008	1
EXONT:000124	3-hydroxy-L-asparagine	PSI-MOD	EXONT:000008	24
EXONT:000131	Modified L-aspartic acid residue	PSI-MOD	EXONT:000008	1
EXONT:000134	Modified L-lysine residue	PSI-MOD	EXONT:000008	67
EXONT:000136	Monohydroxylated lysine	PSI-MOD	EXONT:000008	31
EXONT:000137	5-hydroxy-L-lysine	PSI-MOD	EXONT:000008	43
EXONT:000139	Hydroxylated proline	PSI-MOD	EXONT:000008	36
EXONT:000140	Monohydroxylated proline	PSI-MOD	EXONT:000008	70
EXONT:000142	4-hydroxy-L-proline	PSI-MOD	EXONT:000008	49
EXONT:000144	2-pyrrolidone-5-carboxylic acid (Gln)	PSI-MOD	EXONT:000008	40
EXONT:000147	2-pyrrolidone-5-carboxylic acid	PSI-MOD	EXONT:000008	59
EXONT:000149	L-gamma-carboxyglutamic acid	PSI-MOD	EXONT:000008	36
EXONT:000156	Modified L-histidine residue	PSI-MOD	EXONT:000008	1
EXONT:000157	Phosphorylated L-histidine	PSI-MOD	EXONT:000008	9
EXONT:000161	O-phospho-L-serine	PSI-MOD	EXONT:000008	35139
EXONT:000162	O-phospho-L-threonine	PSI-MOD	EXONT:000008	23189
EXONT:000163	Modified L-tyrosine residue	PSI-MOD	EXONT:000008	2
EXONT:000164	O4'-phospho-L-tyrosine	PSI-MOD	EXONT:000008	20541
EXONT:000167	N-acetyl-L-alanine	PSI-MOD	EXONT:000008	884
EXONT:000177	N-acetylglycine	PSI-MOD	EXONT:000008	23
EXONT:000178	Modified L-isoleucine residue	PSI-MOD	EXONT:000008	3
EXONT:000180	N-acetylated L-lysine	PSI-MOD	EXONT:000008	10163
EXONT:000183	N-acetyl-L-methionine	PSI-MOD	EXONT:000008	770
EXONT:000184	N-acetyl-L-proline	PSI-MOD	EXONT:000008	19
EXONT:000185	Acetylated L-serine	PSI-MOD	EXONT:000008	284
EXONT:000186	N-acetyl-L-serine	PSI-MOD	EXONT:000008	378
EXONT:000187	Acetylated L-threonine	PSI-MOD	EXONT:000008	60
EXONT:000188	N-acetyl-L-threonine	PSI-MOD	EXONT:000008	71
EXONT:000190	Modified L-valine residue	PSI-MOD	EXONT:000008	1
EXONT:000191	N-acetyl-L-valine	PSI-MOD	EXONT:000008	12
EXONT:000192	N6-acetyl-L-lysine	PSI-MOD	EXONT:000008	10729
EXONT:000200	N-myristoylglycine	PSI-MOD	EXONT:000008	140
EXONT:000204	Palmitoylated-L-cysteine	PSI-MOD	EXONT:000008	101
EXONT:000205	N-palmitoyl-L-cysteine	PSI-MOD	EXONT:000008	2
EXONT:000235	Symmetric dimethyl-L-arginine	PSI-MOD	EXONT:000008	55
EXONT:000238	Dimethylated L-arginine	PSI-MOD	EXONT:000008	676
EXONT:000239	Asymmetric dimethyl-L-arginine	PSI-MOD	EXONT:000008	64
EXONT:000240	Monomethylated L-arginine	PSI-MOD	EXONT:000008	1249
EXONT:000241	Omega-N-methyl-L-arginine	PSI-MOD	EXONT:000008	161
EXONT:000244	N5-methyl-L-glutamine	PSI-MOD	EXONT:000008	16
EXONT:000251	Methylated histidine	PSI-MOD	EXONT:000008	9
EXONT:000255	N6,N6,N6-trimethyl-L-lysine	PSI-MOD	EXONT:000008	241
EXONT:000256	N6,N6-dimethyl-L-lysine	PSI-MOD	EXONT:000008	368
EXONT:000257	N6-methyl-L-lysine	PSI-MOD	EXONT:000008	110
EXONT:000258	Monomethylated L-lysine	PSI-MOD	EXONT:000008	767
EXONT:000260	N6-myristoyl-L-lysine	PSI-MOD	EXONT:000008	2
EXONT:000264	O-palmitoyl-L-serine	PSI-MOD	EXONT:000008	16
EXONT:000295	Isoprenylated cysteine	PSI-MOD	EXONT:000008	58
EXONT:000296	S-farnesyl-L-cysteine	PSI-MOD	EXONT:000008	56
EXONT:000300	S-geranylgeranyl-L-cysteine	PSI-MOD	EXONT:000008	96
EXONT:000303	Monomethylated L-cysteine	PSI-MOD	EXONT:000008	26
EXONT:000304	L-cysteine methyl ester	PSI-MOD	EXONT:000008	122
EXONT:000306	S-palmitoyl-L-cysteine	PSI-MOD	EXONT:000008	239
EXONT:000309	S-(L-isoglutamyl)-L-cysteine	PSI-MOD	EXONT:000008	4
EXONT:000322	3'-(S-L-cysteinyl)-L-tyrosine	PSI-MOD	EXONT:000008	2
EXONT:000331	N6-pyridoxal phosphate-L-lysine	PSI-MOD	EXONT:000008	51
EXONT:000333	L-allysine	PSI-MOD	EXONT:000008	17
EXONT:000337	N6-(L-isoglutamyl)-L-lysine (Gln)	PSI-MOD	EXONT:000008	8
EXONT:000340	N6-glycyl-L-lysine	PSI-MOD	EXONT:000008	576
EXONT:000358	Metal or metal cluster containing modified residue	PSI-MOD	EXONT:000008	187
EXONT:000359	Iron containing modified residue	PSI-MOD	EXONT:000008	347
EXONT:000361	Iron-sulfur cluster containing modification	PSI-MOD	EXONT:000008	110
EXONT:000366	Molybdenum containing modified residue	PSI-MOD	EXONT:000008	5
EXONT:000382	N4-glycosyl-L-asparagine	PSI-MOD	EXONT:000008	1932
EXONT:000384	S-glycosylated residue	PSI-MOD	EXONT:000008	1
EXONT:000385	Hexosylated residue	PSI-MOD	EXONT:000008	2
EXONT:000386	Glucosylated residue	PSI-MOD	EXONT:000008	61
EXONT:000388	Monohexosylated (Hex1)	PSI-MOD	EXONT:000008	70
EXONT:000390	Galactosylated residue	PSI-MOD	EXONT:000008	25
EXONT:000392	O-(N-acetylamino)hexosyl-L-serine	PSI-MOD	EXONT:000008	2
EXONT:000393	O-(N-acetylamino)galactosyl-L-serine	PSI-MOD	EXONT:000008	70
EXONT:000396	N-acetylaminogalactosylated residue	PSI-MOD	EXONT:000008	1
EXONT:000398	O-(N-acetylamino)hexosyl-L-threonine	PSI-MOD	EXONT:000008	5
EXONT:000399	O-(N-acetylamino)galactosyl-L-threonine	PSI-MOD	EXONT:000008	147
EXONT:000402	Mannosylated	PSI-MOD	EXONT:000008	16
EXONT:000405	N-asparaginyl-glycosylphosphatidylinositolethanolamine	PSI-MOD	EXONT:000008	14
EXONT:000407	N-aspartyl-glycosylphosphatidylinositolethanolamine	PSI-MOD	EXONT:000008	10
EXONT:000408	N-cysteinyl-glycosylphosphatidylinositolethanolamine	PSI-MOD	EXONT:000008	4
EXONT:000409	N-glycyl-glycosylphosphatidylinositolethanolamine	PSI-MOD	EXONT:000008	21
EXONT:000410	N-seryl-glycosylphosphatidylinositolethanolamine	PSI-MOD	EXONT:000008	53
EXONT:000411	N-alanyl-glycosylphosphatidylinositolethanolamine	PSI-MOD	EXONT:000008	11
EXONT:000417	Omega-N-(ADP-ribosyl)-L-arginine	PSI-MOD	EXONT:000008	22
EXONT:000420	S-(ADP-ribosyl)-L-cysteine	PSI-MOD	EXONT:000008	10
EXONT:000424	O4'-sulfo-L-tyrosine	PSI-MOD	EXONT:000008	53
EXONT:000459	L-3-oxoalanine (Cys)	PSI-MOD	EXONT:000008	16
EXONT:000461	L-alanine 5-imidazolinone glycine	PSI-MOD	EXONT:000008	1
EXONT:000486	S-(glycyl)-L-cysteine (Cys-Gly)	PSI-MOD	EXONT:000008	1
EXONT:000488	Chondroitin sulfate D-glucuronosyl-D-galactosyl-D-galactosyl-D-xylosyl-L-serine	PSI-MOD	EXONT:000008	15
EXONT:000489	Dermatan 4-sulfate D-glucuronosyl-D-galactosyl-D-galactosyl-D-xylosyl-L-serine	PSI-MOD	EXONT:000008	1
EXONT:000490	Heparan sulfate D-glucuronosyl-D-galactosyl-D-galactosyl-D-xylosyl-L-serine	PSI-MOD	EXONT:000008	10
EXONT:000495	L-citrulline	PSI-MOD	EXONT:000008	92
EXONT:000499	2'-alpha-mannosyl-L-tryptophan	PSI-MOD	EXONT:000008	32
EXONT:000515	L-cysteine glutathione disulfide	PSI-MOD	EXONT:000008	12
EXONT:000516	S-nitrosyl-L-cysteine	PSI-MOD	EXONT:000008	643
EXONT:000519	5'-(N6-L-lysine)-L-topaquinone	PSI-MOD	EXONT:000008	10
EXONT:000521	S-methyl-L-cysteine	PSI-MOD	EXONT:000008	14
EXONT:000593	O-octanoyl-L-serine	PSI-MOD	EXONT:000008	1
EXONT:000596	O-D-glucuronosyl-L-serine	PSI-MOD	EXONT:000008	2
EXONT:000598	Nickel containing modified residue	PSI-MOD	EXONT:000008	2
EXONT:000607	Copper containing modified residue	PSI-MOD	EXONT:000008	81
EXONT:000620	Glycine cholesterol ester	PSI-MOD	EXONT:000008	2
EXONT:000647	S-carbamoyl-L-cysteine	PSI-MOD	EXONT:000008	15
EXONT:000657	N-palmitoylglycine	PSI-MOD	EXONT:000008	2
EXONT:000664	4-amino-3-isothiazolidinone-L-serine	PSI-MOD	EXONT:000008	1
EXONT:000667	N-glycyl-1-(phosphatidyl)ethanolamine	PSI-MOD	EXONT:000008	7
EXONT:000668	L-glutamyl 5-omega-hydroxyceramide ester	PSI-MOD	EXONT:000008	5
EXONT:000691	Manganese containing modified residue	PSI-MOD	EXONT:000008	218
EXONT:000692	Calcium containing modified residue	PSI-MOD	EXONT:000008	445
EXONT:000708	2-imino-methionine 5-imidazolinone glycine	PSI-MOD	EXONT:000008	4
EXONT:000714	O-decanoyl-L-serine	PSI-MOD	EXONT:000008	1
EXONT:000739	Sodium containing modified residue	PSI-MOD	EXONT:000008	5
EXONT:000753	N-acetylaminoglucosylated residue	PSI-MOD	EXONT:000008	3
EXONT:000797	Ubiquitinylated lysine	PSI-MOD	EXONT:000008	19780
EXONT:000809	Complex glycosylation	PSI-MOD	EXONT:000008	140
EXONT:000832	Deamidated L-asparagine	PSI-MOD	EXONT:000008	19
EXONT:000917	L-methionine sulfoxide	PSI-MOD	EXONT:000008	16
EXONT:000935	Cysteinylation (disulfide with free L-cysteine)	PSI-MOD	EXONT:000008	9698
EXONT:000962	O-glucosyl-L-serine	PSI-MOD	EXONT:000008	21
EXONT:000963	O-(N-acetylamino)glucosyl-L-serine	PSI-MOD	EXONT:000008	201
EXONT:000964	O-(N-acetylamino)glucosyl-L-threonine	PSI-MOD	EXONT:000008	106
EXONT:000971	O-fucosyl-L-serine	PSI-MOD	EXONT:000008	12
EXONT:000972	O-fucosyl-L-threonine	PSI-MOD	EXONT:000008	22
EXONT:000973	O-xylosyl-L-serine	PSI-MOD	EXONT:000008	19
EXONT:000992	N4-(N-acetylamino)glucosyl-L-asparagine	PSI-MOD	EXONT:000008	8831
EXONT:001003	Potassium containing modified residue	PSI-MOD	EXONT:000008	24
EXONT:001169	Sumoylated lysine	PSI-MOD	EXONT:000008	559
EXONT:001170	Neddylated lysine	PSI-MOD	EXONT:000008	19
EXONT:001175	S-(15-deoxy-Delta12,14-prostaglandin J2-9-yl)-L-cysteine	PSI-MOD	EXONT:000008	3
EXONT:001233	(18)O monosubstituted L-serine	PSI-MOD	EXONT:000008	39
EXONT:001234	(18)O monosubstituted L-threonine	PSI-MOD	EXONT:000008	17
EXONT:001235	(18)O monosubstituted L-tyrosine	PSI-MOD	EXONT:000008	70
EXONT:001307	N6-succinyl-L-lysine	PSI-MOD	EXONT:000008	788
EXONT:001336	Nitrated L-tyrosine	PSI-MOD	EXONT:000008	65
EXONT:001393	(2S,3S)-3-hydroxyasparagine	PSI-MOD	EXONT:000008	26
EXONT:001551	O-glycyl-L-serine	PSI-MOD	EXONT:000008	1
EXONT:001566	S-(L-lysyl)-L-methionine sulfilimine	PSI-MOD	EXONT:000008	6
EXONT:001748	1'-(L-tryptophan-3'-yl)-L-tryptophan	PSI-MOD	EXONT:000008	1
EXONT:001792	N6-crotonyl-L-lysine	PSI-MOD	EXONT:000008	53
EXONT:001793	N6-malonyl-L-lysine	PSI-MOD	EXONT:000008	22
EXONT:001881	Kringle-like fold	IPR_Domain	EXONT:000011	115
EXONT:001882	Kringle	IPR_Domain	EXONT:000011	80
EXONT:001883	Tubby C-terminal-like domain	IPR_Domain	EXONT:000011	32
EXONT:001884	Tubby, C-terminal	IPR_Domain	EXONT:000011	30
EXONT:001885	Protein binding	GO_molecular_function	EXONT:000005	22182
EXONT:001886	C2 domain	IPR_Domain	EXONT:000005	994
EXONT:001892	Proteinase inhibitor I25, cystatin	IPR_Domain	EXONT:000002	69
EXONT:001900	PAS domain	IPR_Domain	EXONT:000003	188
EXONT:001901	Anaphylatoxin/fibulin	IPR_Domain	EXONT:000011	10
EXONT:001903	Carboxyl transferase	IPR_Domain	EXONT:000002	59
EXONT:001909	Phosphofructokinase domain	IPR_Domain	EXONT:000002	68
EXONT:001916	Phosphoribosylaminoimidazole carboxylase PurE domain	IPR_Domain	EXONT:000011	3
EXONT:001917	Phosphotransferase system, phosphocarrier HPr protein-like	IPR_Domain	EXONT:000011	1
EXONT:001918	LDLR class B repeat	IPR_Repeat	EXONT:000011,EXONT:000007	203
EXONT:001919	Laminin B type IV	IPR_Domain	EXONT:000011	52
EXONT:001931	Helix-turn-helix motif	IPR_Site	EXONT:000005	58
EXONT:001933	IQ motif, EF-hand binding site	IPR_Site	EXONT:000005	191
EXONT:001934	Electron transfer flavoprotein, beta-subunit, conserved site	IPR_Site	EXONT:000004	1
EXONT:001942	Zinc finger, AN1-type	IPR_Domain	EXONT:000005	24
EXONT:001945	NUDIX hydrolase, NudL, conserved site	IPR_Site	EXONT:000002,EXONT:000005	2
EXONT:001949	SWAP/Surp	IPR_Domain	EXONT:000005	25
EXONT:001954	Pectin lyase fold/virulence factor	IPR_Domain	EXONT:000011	78
EXONT:001955	Pectin lyase fold	IPR_Domain	EXONT:000011	47
EXONT:001965	PDGF/VEGF domain	IPR_Domain	EXONT:000005	29
EXONT:001966	Alpha/beta hydrolase fold-1	IPR_Domain	EXONT:000011	101
EXONT:001968	SEA domain	IPR_Domain	EXONT:000011	101
EXONT:001969	Fibronectin, type I	IPR_Domain	EXONT:000011	21
EXONT:001971	NUDIX hydrolase domain	IPR_Domain	EXONT:000002	97
EXONT:001972	NUDIX hydrolase domain-like	IPR_Domain	EXONT:000002	107
EXONT:001973	Biotin/lipoyl attachment	IPR_Domain	EXONT:000011	27
EXONT:001974	CRIB domain	IPR_Domain	EXONT:000011	32
EXONT:001975	Neuraxin/MAP1B repeat	IPR_Repeat	EXONT:000011,EXONT:000007	1
EXONT:001976	Granulin	IPR_Domain	EXONT:000011	11
EXONT:001977	Pyruvate/Phosphoenolpyruvate kinase-like domain	IPR_Domain	EXONT:000002	22
EXONT:001982	Ubiquitin-activating enzyme repeat	IPR_Repeat	EXONT:000002,EXONT:000005,EXONT:000007	19
EXONT:002002	Hydroxymethylglutaryl-CoA lyase, active site	IPR_Site	EXONT:000002	1
EXONT:002007	EGF-type aspartate/asparagine hydroxylation site	IPR_Site	EXONT:000011,EXONT:000008	469
EXONT:002008	Pleckstrin homology-like domain	IPR_Domain	EXONT:000011	1583
EXONT:002009	Ran binding domain	IPR_Domain	EXONT:000011	27
EXONT:002010	Toll/interleukin-1 receptor homology (TIR) domain	IPR_Domain	EXONT:000005	54
EXONT:002011	Ras-association	IPR_Domain	EXONT:000011	109
EXONT:002013	Cysteine peptidase, cysteine active site	IPR_Site	EXONT:000002,EXONT:000011	39
EXONT:002016	Glucose-methanol-choline oxidoreductase, N-terminal	IPR_Domain	EXONT:000002,EXONT:000005	4
EXONT:002020	Apple domain	IPR_Domain	EXONT:000011,EXONT:000005	8
EXONT:002021	Apple-like	IPR_Domain	EXONT:000011	26
EXONT:002022	PAN-1 domain	IPR_Domain	EXONT:000011	20
EXONT:002023	Renal dipeptidase, active site	IPR_Site	EXONT:000002	3
EXONT:002030	Acyl-CoA N-acyltransferase	IPR_Domain	EXONT:000011	193
EXONT:002031	GNAT domain	IPR_Domain	EXONT:000002,EXONT:000011	95
EXONT:002037	Bacterial surface antigen (D15)	IPR_Domain	EXONT:000011	10
EXONT:002039	Corticotropin-releasing factor, CRF	IPR_Domain	EXONT:000005	3
EXONT:002043	Pyridoxal phosphate-dependent transferase	IPR_Domain	EXONT:000011	495
EXONT:002044	Aminotransferase, class V/Cysteine desulfurase	IPR_Domain	EXONT:000011	58
EXONT:002045	ATPase, F1/V1/A1 complex, alpha/beta subunit, nucleotide-binding domain	IPR_Domain	EXONT:000005	31
EXONT:002050	Rab-GTPase-TBC domain	IPR_Domain	EXONT:000002	356
EXONT:002057	Ribosomal protein L19/L19e domain	IPR_Domain	EXONT:000011	4
EXONT:002059	Zinc finger, TAZ-type	IPR_Domain	EXONT:000002,EXONT:000005	7
EXONT:002062	Rho GTPase activation protein	IPR_Domain	EXONT:000011	545
EXONT:002063	Rho GTPase-activating protein domain	IPR_Domain	EXONT:000011	388
EXONT:002070	GPS motif	IPR_Domain	EXONT:000011	63
EXONT:002075	Peptidase S8/S53 domain	IPR_Domain	EXONT:000002	103
EXONT:002076	BTB/POZ fold	IPR_Domain	EXONT:000011	367
EXONT:002077	BTB/POZ-like	IPR_Domain	EXONT:000011,EXONT:000005	342
EXONT:002080	Zinc finger, DNA glycosylase/AP lyase-type	IPR_Domain	EXONT:000002,EXONT:000005	2
EXONT:002089	Dbl homology (DH) domain	IPR_Domain	EXONT:000005	446
EXONT:002092	Protein phosphatase 2C, manganese/magnesium aspartate binding site	IPR_Site	EXONT:000002,EXONT:000005	11
EXONT:002097	Armadillo	IPR_Repeat	EXONT:000005,EXONT:000007	232
EXONT:002098	Heat shock factor (HSF)-type, DNA-binding	IPR_Domain	EXONT:000011,EXONT:000005	18
EXONT:002099	Winged helix-turn-helix DNA-binding domain	IPR_Domain	EXONT:000011	603
EXONT:002102	Cadherin, cytoplasmic domain	IPR_Domain	EXONT:000005	44
EXONT:002103	GRIP	IPR_Domain	EXONT:000005	13
EXONT:002104	Putative RNA methylase domain	IPR_Domain	EXONT:000011	15
EXONT:002105	Protein-tyrosine/Dual specificity phosphatase	IPR_Domain	EXONT:000002	254
EXONT:002106	Protein-tyrosine phosphatase, receptor/non-receptor type	IPR_Domain	EXONT:000002	399
EXONT:002109	Forkhead-associated (FHA) domain	IPR_Domain	EXONT:000005	116
EXONT:002110	SMAD/FHA domain	IPR_Domain	EXONT:000005	180
EXONT:002119	Uroporphyrinogen decarboxylase (URO-D)	IPR_Domain	EXONT:000002	9
EXONT:002129	EPS15 homology (EH)	IPR_Domain	EXONT:000005	57
EXONT:002130	Aldolase-type TIM barrel	IPR_Domain	EXONT:000002	288
EXONT:002131	FMN-dependent dehydrogenase	IPR_Domain	EXONT:000002	15
EXONT:002132	Phox/Bem1p	IPR_Domain	EXONT:000005	43
EXONT:002135	NADH:ubiquinone oxidoreductase, 75kDa subunit, conserved site	IPR_Site	EXONT:000002	4
EXONT:002138	Gamma-carboxyglutamic acid-rich (GLA) domain	IPR_Domain	EXONT:000005	61
EXONT:002140	Peptidyl-prolyl cis-trans isomerase, PpiC-type	IPR_Domain	EXONT:000002	6
EXONT:002143	FERM domain	IPR_Domain	EXONT:000011	430
EXONT:002144	Endonuclease/exonuclease/phosphatase	IPR_Domain	EXONT:000011	203
EXONT:002145	Inositol polyphosphate-related phosphatase	IPR_Domain	EXONT:000011	95
EXONT:002146	GIY-YIG nuclease superfamily	IPR_Domain	EXONT:000011	8
EXONT:002147	Zinc finger, RING/FYVE/PHD-type	IPR_Domain	EXONT:000011	1057
EXONT:002148	Zinc finger, FYVE/PHD-type	IPR_Domain	EXONT:000011	438
EXONT:002149	FYVE zinc finger	IPR_Domain	EXONT:000011,EXONT:000005	67
EXONT:002151	Glycosyl transferase, family 3	IPR_Domain	EXONT:000002	8
EXONT:002152	PWWP domain	IPR_Domain	EXONT:000011	66
EXONT:002153	Zinc finger, B-box	IPR_Domain	EXONT:000005	99
EXONT:002154	Trypsin-like cysteine/serine peptidase domain	IPR_Domain	EXONT:000002	591
EXONT:002165	Hedgehog signalling/DD-peptidase zinc-binding domain	IPR_Domain	EXONT:000011	11
EXONT:002166	Hedgehog, N-terminal signalling domain	IPR_Domain	EXONT:000011	7
EXONT:002168	Copper type II, ascorbate-dependent monooxygenase, N-terminal	IPR_Domain	EXONT:000002,EXONT:000005	16
EXONT:002172	Phosphatidic acid phosphatase type 2/haloperoxidase	IPR_Domain	EXONT:000002	85
EXONT:002173	POU-specific	IPR_Domain	EXONT:000005	21
EXONT:002175	SNF2-related	IPR_Domain	EXONT:000005	213
EXONT:002176	Rap GTPase activating protein domain	IPR_Domain	EXONT:000002	70
EXONT:002181	Immunoglobulin E-set	IPR_Domain	EXONT:000011	584
EXONT:002184	Dual specificity phosphatase, catalytic domain	IPR_Domain	EXONT:000002	133
EXONT:002185	Phosphatidylinositol 3-kinase Ras-binding (PI3K RBD) domain	IPR_Domain	EXONT:000011	19
EXONT:002186	Regulator of G protein signalling superfamily	IPR_Domain	EXONT:000011	159
EXONT:002187	Regulator of G protein signalling domain	IPR_Domain	EXONT:000011	117
EXONT:002191	Peptide chain release factor class I/class II	IPR_Domain	EXONT:000005	15
EXONT:002192	MHC classes I/II-like antigen recognition protein	IPR_Domain	EXONT:000011	97
EXONT:002193	MHC class II, alpha/beta chain, N-terminal	IPR_Domain	EXONT:000011	24
EXONT:002194	MHC class II, beta chain, N-terminal	IPR_Domain	EXONT:000011	6
EXONT:002195	Involucrin repeat	IPR_Repeat	EXONT:000011,EXONT:000007	1
EXONT:002196	HEAT	IPR_Repeat	EXONT:000005,EXONT:000007	35
EXONT:002197	FeS cluster biogenesis	IPR_Domain	EXONT:000011	7
EXONT:002199	Leucine-rich repeat-containing N-terminal	IPR_Domain	EXONT:000011	116
EXONT:002201	Dynamin central domain	IPR_Domain	EXONT:000005	43
EXONT:002204	MoaA/nifB/pqqE, iron-sulphur binding, conserved site	IPR_Site	EXONT:000002,EXONT:000005	2
EXONT:002209	TPP-binding enzyme, conserved site	IPR_Site	EXONT:000005	2
EXONT:002212	Protein kinase-like domain	IPR_Domain	EXONT:000002	4113
EXONT:002213	Phosphatidylinositol 3-/4-kinase, catalytic domain	IPR_Domain	EXONT:000002	128
EXONT:002215	Regulator of chromosome condensation, RCC1	IPR_Repeat	EXONT:000011,EXONT:000007	176
EXONT:002216	BEACH domain	IPR_Domain	EXONT:000011	71
EXONT:002217	Nitroreductase-like	IPR_Domain	EXONT:000002	5
EXONT:002220	Ets domain	IPR_Domain	EXONT:000011,EXONT:000005	57
EXONT:002222	Galactose-binding domain-like	IPR_Domain	EXONT:000011	346
EXONT:002223	Coagulation factor 5/8 C-terminal type domain	IPR_Domain	EXONT:000011	107
EXONT:002224	Proteasome alpha-subunit, N-terminal domain	IPR_Domain	EXONT:000002	13
EXONT:002226	DNA mismatch repair protein MutS, C-terminal	IPR_Domain	EXONT:000005	28
EXONT:002230	Zinc finger, ZZ-type	IPR_Domain	EXONT:000005	37
EXONT:002231	Sushi/SCR/CCP	IPR_Domain	EXONT:000011	472
EXONT:002232	Helix-hairpin-helix motif	IPR_Site	EXONT:000005	3
EXONT:002234	Ubiquitin-associated domain/translation elongation factor EF-Ts, N-terminal	IPR_Domain	EXONT:000005	56
EXONT:002235	Cytosolic fatty-acid binding	IPR_Domain	EXONT:000004,EXONT:000011,EXONT:000005	64
EXONT:002237	Calycin-like	IPR_Domain	EXONT:000011	161
EXONT:002238	Calycin	IPR_Domain	EXONT:000011	151
EXONT:002239	Lipocalin/cytosolic fatty-acid binding domain	IPR_Domain	EXONT:000011	119
EXONT:002240	G-patch domain	IPR_Domain	EXONT:000005	46
EXONT:002246	TGF-beta receptor/activin receptor, type I/II	IPR_Domain	EXONT:000002,EXONT:000003	19
EXONT:002250	Reverse transcriptase domain	IPR_Domain	EXONT:000011	12
EXONT:002251	Cation-independent mannose-6-phosphate receptor	IPR_Repeat	EXONT:000004,EXONT:000007	42
EXONT:002252	Cysteine-rich flanking region, C-terminal	IPR_Domain	EXONT:000011	117
EXONT:002258	Death-like domain	IPR_Domain	EXONT:000011	199
EXONT:002259	Death domain	IPR_Domain	EXONT:000011,EXONT:000005	75
EXONT:002260	Dihydropteroate synthase-like	IPR_Domain	EXONT:000011	7
EXONT:002261	Pterin-binding	IPR_Domain	EXONT:000011	10
EXONT:002262	EGF receptor, L domain	IPR_Domain	EXONT:000011	64
EXONT:002265	RNA recognition motif domain	IPR_Domain	EXONT:000005	900
EXONT:002270	P-type trefoil	IPR_Domain	EXONT:000011	23
EXONT:002271	P-loop containing nucleoside triphosphate hydrolase	IPR_Domain	EXONT:000011	6399
EXONT:002272	AAA+ ATPase domain	IPR_Domain	EXONT:000011	995
EXONT:002273	Magnesium chelatase, ChlI subunit	IPR_Domain	EXONT:000002,EXONT:000011	4
EXONT:002280	Glucagon/GIP/secretin/VIP	IPR_Domain	EXONT:000005	10
EXONT:002283	PapD-like	IPR_Domain	EXONT:000011	46
EXONT:002284	MSP domain	IPR_Domain	EXONT:000011	24
EXONT:002285	Nuclear hormone receptor, ligand-binding, core	IPR_Domain	EXONT:000003,EXONT:000005	196
EXONT:002287	C-type lectin fold	IPR_Domain	EXONT:000011	495
EXONT:002288	C-type lectin-like	IPR_Domain	EXONT:000011	432
EXONT:002289	Link	IPR_Domain	EXONT:000011,EXONT:000005	54
EXONT:002293	Clathrin, heavy chain/VPS, 7-fold repeat	IPR_Repeat	EXONT:000011,EXONT:000007	56
EXONT:002297	DNA binding domain, putative	IPR_Domain	EXONT:000011	16
EXONT:002299	JAB/MPN domain	IPR_Domain	EXONT:000005	55
EXONT:002300	Calponin repeat	IPR_Repeat	EXONT:000011,EXONT:000007	13
EXONT:002301	Fibronectin, type II, collagen-binding	IPR_Domain	EXONT:000011	42
EXONT:002303	HECT	IPR_Domain	EXONT:000002	253
EXONT:002304	Zinc finger, CCCH-type	IPR_Domain	EXONT:000005	152
EXONT:002305	Oxidoreductase, molybdopterin-binding domain	IPR_Domain	EXONT:000004	1
EXONT:002306	Aconitase/3-isopropylmalate dehydratase, swivel	IPR_Domain	EXONT:000011	17
EXONT:002307	Aconitase A/isopropylmalate dehydratase small subunit, swivel	IPR_Domain	EXONT:000011	12
EXONT:002309	FERM/acyl-CoA-binding protein, 3-helical bundle	IPR_Domain	EXONT:000011	198
EXONT:002310	Acyl-CoA-binding protein, ACBP	IPR_Domain	EXONT:000011,EXONT:000005	28
EXONT:002312	Class II glutamine amidotransferase domain	IPR_Domain	EXONT:000011	25
EXONT:002313	Hemopexin-like domain	IPR_Domain	EXONT:000011	108
EXONT:002314	Creatinase	IPR_Domain	EXONT:000002	10
EXONT:002316	Hydroxymethylglutaryl-coenzyme A synthase, active site	IPR_Site	EXONT:000002	2
EXONT:002319	DEP domain	IPR_Domain	EXONT:000011	71
EXONT:002320	RasGAP protein, C-terminal	IPR_Domain	EXONT:000002	9
EXONT:002321	UBA/THIF-type NAD/FAD binding fold	IPR_Domain	EXONT:000002	59
EXONT:002322	RmlC-like jelly roll fold	IPR_Domain	EXONT:000011	214
EXONT:002323	Cyclic nucleotide-binding-like	IPR_Domain	EXONT:000011	195
EXONT:002324	Cyclic nucleotide-binding domain	IPR_Domain	EXONT:000011	138
EXONT:002325	PKD/Chitinase domain	IPR_Domain	EXONT:000011	53
EXONT:002326	PKD domain	IPR_Domain	EXONT:000011	51
EXONT:002327	Glycoside hydrolase/deacetylase, beta/alpha-barrel	IPR_Domain	EXONT:000002	48
EXONT:002328	Glycoside hydrolase 38/57, N-terminal domain	IPR_Domain	EXONT:000002	40
EXONT:002329	Glycoside hydrolase family 38, N-terminal domain	IPR_Domain	EXONT:000002	38
EXONT:002335	Double-stranded RNA-specific adenosine deaminase (DRADA)	IPR_Domain	EXONT:000002,EXONT:000011,EXONT:000005	4
EXONT:002340	Ubiquitin-conjugating enzyme/RWD-like	IPR_Domain	EXONT:000011	288
EXONT:002341	Ubiquitin-conjugating enzyme, E2	IPR_Domain	EXONT:000002,EXONT:000011	206
EXONT:002345	Drug/metabolite transporter	IPR_Domain	EXONT:000011	23
EXONT:002346	Ubiquitin domain	IPR_Domain	EXONT:000005	133
EXONT:002349	RNA helicase, ATP-dependent, DEAD-box, conserved site	IPR_Site	EXONT:000002,EXONT:000005	31
EXONT:002354	YjeF C-terminal domain, carbohydrate kinase-related	IPR_Domain	EXONT:000011	10
EXONT:002355	Vinculin, conserved site	IPR_Site	EXONT:000011	10
EXONT:002356	Serine/threonine dehydratase, pyridoxal-phosphate-binding site	IPR_Site	EXONT:000005	4
EXONT:002358	HMG-I/HMG-Y, DNA-binding, conserved site	IPR_Site	EXONT:000011	7
EXONT:002359	Translation elongation factor EFG, V domain	IPR_Domain	EXONT:000011	19
EXONT:002360	Peptidase M41	IPR_Domain	EXONT:000002,EXONT:000005	17
EXONT:002362	CBS domain	IPR_Domain	EXONT:000005	83
EXONT:002366	Ras-like guanine nucleotide exchange factor, N-terminal	IPR_Domain	EXONT:000005	102
EXONT:002367	Peptidase C1A, papain C-terminal	IPR_Domain	EXONT:000002	80
EXONT:002373	Aldehyde oxidase/xanthine dehydrogenase, a/b hammerhead	IPR_Domain	EXONT:000011	9
EXONT:002375	Zinc finger, GATA-type	IPR_Domain	EXONT:000005	37
EXONT:002376	Oxidoreductase, N-terminal	IPR_Domain	EXONT:000002	11
EXONT:002377	RNA polymerase II, heptapeptide repeat, eukaryotic	IPR_Repeat	EXONT:000005,EXONT:000007	2
EXONT:002379	RIO-like kinase	IPR_Domain	EXONT:000002,EXONT:000005	17
EXONT:002380	RIO kinase	IPR_Domain	EXONT:000002,EXONT:000005	15
EXONT:002381	Zinc finger, C2H2-type matrin	IPR_Domain	EXONT:000005	17
EXONT:002382	Zinc finger, U1-type	IPR_Domain	EXONT:000005	97
EXONT:002383	WH1/EVH1	IPR_Domain	EXONT:000011	48
EXONT:002390	Intracellular calcium-release channel	IPR_Domain	EXONT:000004	65
EXONT:002400	PAS-associated, C-terminal	IPR_Domain	EXONT:000002,EXONT:000003	13
EXONT:002404	Thyroglobulin type-1	IPR_Domain	EXONT:000011	75
EXONT:002405	Proteasome component (PCI) domain	IPR_Domain	EXONT:000005	72
EXONT:002406	Protein kinase domain	IPR_Domain	EXONT:000002,EXONT:000005	3672
EXONT:002407	RNA polymerase, alpha subunit	IPR_Domain	EXONT:000002,EXONT:000005	11
EXONT:002412	Target SNARE coiled-coil domain	IPR_Domain	EXONT:000005	83
EXONT:002413	AIR synthase related protein, N-terminal domain	IPR_Domain	EXONT:000002	11
EXONT:002414	PurM, N-terminal-like	IPR_Domain	EXONT:000002	17
EXONT:002415	Sterol-sensing domain	IPR_Domain	EXONT:000011	43
EXONT:002416	S15/NS1, RNA-binding	IPR_Domain	EXONT:000011	15
EXONT:002417	WHEP-TRS	IPR_Domain	EXONT:000002,EXONT:000011,EXONT:000005	11
EXONT:002421	Epidermal growth factor-like domain	IPR_Domain	EXONT:000005	1324
EXONT:002423	Homeodomain engrailed	IPR_Domain	EXONT:000005	2
EXONT:002424	Homeodomain, metazoa	IPR_Domain	EXONT:000005	115
EXONT:002425	Homeobox domain	IPR_Domain	EXONT:000005	382
EXONT:002426	Homeodomain-like	IPR_Domain	EXONT:000005	662
EXONT:002430	Diacylglycerol kinase, accessory domain	IPR_Domain	EXONT:000002	43
EXONT:002431	Concanavalin A-like lectin/glucanase, subgroup	IPR_Domain	EXONT:000011	667
EXONT:002433	SAND domain-like	IPR_Domain	EXONT:000011	25
EXONT:002434	SAND domain	IPR_Domain	EXONT:000011,EXONT:000005	23
EXONT:002435	Ricin B lectin domain	IPR_Domain	EXONT:000011	111
EXONT:002442	FAS1 domain	IPR_Domain	EXONT:000011	93
EXONT:002443	RNA polymerase, subunit H/Rpb5 C-terminal	IPR_Domain	EXONT:000002,EXONT:000005	4
EXONT:002444	Ribonucleotide reductase large subunit, C-terminal	IPR_Domain	EXONT:000011	13
EXONT:002448	ATPase, F1/V1/A1 complex, alpha/beta subunit, C-terminal	IPR_Domain	EXONT:000004,EXONT:000002	17
EXONT:002449	Elongation factor, GTP-binding domain	IPR_Domain	EXONT:000002,EXONT:000005	116
EXONT:002450	Notch domain	IPR_Domain	EXONT:000011	18
EXONT:002451	Clathrin adaptor complex, small chain	IPR_Site	EXONT:000011	10
EXONT:002452	Mrp, conserved site	IPR_Site	EXONT:000005	3
EXONT:002453	Peptidase M17, leucyl aminopeptidase, C-terminal	IPR_Domain	EXONT:000002	18
EXONT:002462	CC chemokine, conserved site	IPR_Site	EXONT:000005	42
EXONT:002466	Peptidase M14, carboxypeptidase A	IPR_Domain	EXONT:000002,EXONT:000005	183
EXONT:002470	Phosphoribosyltransferase domain	IPR_Domain	EXONT:000011	18
EXONT:002473	Phosphoribosyl pyrophosphate synthetase, conserved site	IPR_Site	EXONT:000002,EXONT:000005	5
EXONT:002476	Lambda repressor-like, DNA-binding domain	IPR_Domain	EXONT:000005	63
EXONT:002477	Nucleoside phosphorylase domain	IPR_Domain	EXONT:000002	29
EXONT:002478	NAD(P)-binding domain	IPR_Domain	EXONT:000011	982
EXONT:002484	GPCR, family 2-like	IPR_Domain	EXONT:000003	316
EXONT:002485	GPCR, cAMP-type	IPR_Domain	EXONT:000003,EXONT:000005	2
EXONT:002489	MyTH4 domain	IPR_Domain	EXONT:000011	48
EXONT:002491	CUB domain	IPR_Domain	EXONT:000011	468
EXONT:002494	Sulfotransferase domain	IPR_Domain	EXONT:000002	132
EXONT:002495	Thioredoxin-like fold	IPR_Domain	EXONT:000011	567
EXONT:002496	Alkyl hydroperoxide reductase subunit C/ Thiol specific antioxidant	IPR_Domain	EXONT:000002,EXONT:000011	21
EXONT:002499	Insulin-like growth factor-binding protein, IGFBP	IPR_Domain	EXONT:000005	33
EXONT:002500	Isochorismatase-like	IPR_Domain	EXONT:000002	10
EXONT:002501	AMP-dependent synthetase/ligase	IPR_Domain	EXONT:000002	357
EXONT:002504	Tetrapyrrole methylase	IPR_Domain	EXONT:000002	7
EXONT:002505	Thrombospondin, type 1 repeat	IPR_Repeat	EXONT:000011,EXONT:000007	403
EXONT:002506	Fibrillar collagen, C-terminal	IPR_Domain	EXONT:000011	47
EXONT:002507	Pyruvate carboxyltransferase	IPR_Domain	EXONT:000002	23
EXONT:002509	Uncharacterised domain, di-copper centre	IPR_Domain	EXONT:000011	19
EXONT:002511	Signal recognition particle, SRP54 subunit, GTPase domain	IPR_Domain	EXONT:000011,EXONT:000005	12
EXONT:002512	Nebulin repeat	IPR_Repeat	EXONT:000011,EXONT:000007	242
EXONT:002514	Sec7 domain	IPR_Domain	EXONT:000005	97
EXONT:002515	Gcp-like domain	IPR_Domain	EXONT:000011	16
EXONT:002516	ZU5	IPR_Domain	EXONT:000011	36
EXONT:002517	Phospholipase C, phosphatidylinositol-specific , X domain	IPR_Domain	EXONT:000011	73
EXONT:002520	Alkaline-phosphatase-like, core domain	IPR_Domain	EXONT:000002	271
EXONT:002521	Sulfatase	IPR_Domain	EXONT:000002	117
EXONT:002524	D-galactoside/L-rhamnose binding SUEL lectin domain	IPR_Domain	EXONT:000005	11
EXONT:002526	Cupredoxin	IPR_Domain	EXONT:000011	138
EXONT:002527	SNAP-25	IPR_Domain	EXONT:000011	10
EXONT:002530	CAP Gly-rich domain	IPR_Domain	EXONT:000011	45
EXONT:002534	ELM2 domain	IPR_Domain	EXONT:000011	53
EXONT:002535	Uncharacterised protein family UPF0017, hydrolase-like, conserved site	IPR_Site	EXONT:000011	5
EXONT:002536	Chromo domain-like	IPR_Domain	EXONT:000011	121
EXONT:002537	Chromo domain/shadow	IPR_Domain	EXONT:000011	115
EXONT:002546	POLO box duplicated domain	IPR_Domain	EXONT:000005	15
EXONT:002547	AGC-kinase, C-terminal	IPR_Domain	EXONT:000002,EXONT:000005	137
EXONT:002549	Aldehyde dehydrogenase domain	IPR_Domain	EXONT:000002	180
EXONT:002550	Gamma-glutamyl phosphate reductase GPR	IPR_Domain	EXONT:000002	9
EXONT:002551	Aldehyde/histidinol dehydrogenase	IPR_Domain	EXONT:000002	191
EXONT:002553	Zinc finger, NF-X1-type	IPR_Domain	EXONT:000005	23
EXONT:002554	Wilm's tumour protein, N-terminal	IPR_Domain	EXONT:000011	8
EXONT:002557	SH2 domain	IPR_Domain	EXONT:000005	406
EXONT:002559	Peptidase M24, structural domain	IPR_Domain	EXONT:000011	82
EXONT:002560	MAM domain	IPR_Domain	EXONT:000011	76
EXONT:002561	Ribonuclease III domain	IPR_Domain	EXONT:000002,EXONT:000005	22
EXONT:002569	Chitin-binding, type 1	IPR_Domain	EXONT:000005	1
EXONT:002570	MHC class II, alpha chain, N-terminal	IPR_Domain	EXONT:000011	6
EXONT:002572	SANT/Myb domain	IPR_Domain	EXONT:000005	159
EXONT:002573	Von Willebrand factor, type C	IPR_Domain	EXONT:000005	152
EXONT:002574	UBX	IPR_Domain	EXONT:000005	34
EXONT:002575	Ribosomal protein L23/L25, conserved site	IPR_Site	EXONT:000011	1
EXONT:002577	Dehydrogenase, E1 component	IPR_Domain	EXONT:000002	39
EXONT:002582	Lipase/lipooxygenase, PLAT/LH2	IPR_Domain	EXONT:000011	113
EXONT:002583	PLAT/LH2 domain	IPR_Domain	EXONT:000011,EXONT:000005	113
EXONT:002584	Bromo adjacent homology (BAH) domain	IPR_Domain	EXONT:000005	56
EXONT:002585	ENTH/VHS	IPR_Domain	EXONT:000011	121
EXONT:002586	Epsin-like, N-terminal	IPR_Domain	EXONT:000011	33
EXONT:002587	Epsin domain, N-terminal	IPR_Domain	EXONT:000011	15
EXONT:002589	Aconitase/3-isopropylmalate dehydratase large subunit, alpha/beta/alpha	IPR_Domain	EXONT:000011	45
EXONT:002590	Thioesterase	IPR_Domain	EXONT:000002	11
EXONT:002593	MHC class I-like antigen recognition	IPR_Domain	EXONT:000011	82
EXONT:002594	MHC class I alpha chain, alpha1 alpha2 domains	IPR_Domain	EXONT:000011	52
EXONT:002595	2Fe-2S ferredoxin-type domain	IPR_Domain	EXONT:000004,EXONT:000011,EXONT:000005	21
EXONT:002596	Beta-grasp domain	IPR_Domain	EXONT:000011	44
EXONT:002597	Aspartate/glutamate/uridylate kinase	IPR_Domain	EXONT:000011	12
EXONT:002599	Adenylyl cyclase class-3/4/guanylyl cyclase	IPR_Domain	EXONT:000002	160
EXONT:002600	Nucleic acid-binding, OB-fold	IPR_Domain	EXONT:000011	400
EXONT:002603	FCH domain	IPR_Domain	EXONT:000011	73
EXONT:002604	Gamma-crystallin-related	IPR_Domain	EXONT:000011	75
EXONT:002605	Beta/gamma crystallin	IPR_Domain	EXONT:000011	79
EXONT:002606	Complement C1q protein	IPR_Domain	EXONT:000011	47
EXONT:002607	NIF system FeS cluster assembly, NifU, C-terminal	IPR_Domain	EXONT:000005	3
EXONT:002609	O-methyltransferase, family 2	IPR_Domain	EXONT:000002	14
EXONT:002610	2-oxoacid dehydrogenase acyltransferase, catalytic domain	IPR_Domain	EXONT:000002	24
EXONT:002611	Galectin, carbohydrate recognition domain	IPR_Domain	EXONT:000011,EXONT:000005	55
EXONT:002613	Microtubule associated protein, tubulin-binding repeat	IPR_Repeat	EXONT:000005,EXONT:000007	12
EXONT:002619	Lipase, GDSL	IPR_Domain	EXONT:000002	50
EXONT:002620	Ephrin receptor ligand binding domain	IPR_Domain	EXONT:000011	46
EXONT:002621	IMP dehydrogenase/GMP reductase	IPR_Domain	EXONT:000002	44
EXONT:002622	DNA-directed DNA polymerase, family A, palm domain	IPR_Domain	EXONT:000002,EXONT:000005	34
EXONT:002624	Plectin repeat	IPR_Repeat	EXONT:000011,EXONT:000007	5
EXONT:002625	Immunoglobulin-like fold	IPR_Domain	EXONT:000011	3810
EXONT:002626	Transglutaminase, N-terminal	IPR_Domain	EXONT:000011	25
EXONT:002627	3-oxo-5-alpha-steroid 4-dehydrogenase, C-terminal	IPR_Domain	EXONT:000002	21
EXONT:002628	Uncharacterised protein family UPF0012, conserved site	IPR_Site	EXONT:000011	1
EXONT:002629	Transforming growth factor-beta, N-terminal	IPR_Domain	EXONT:000005	79
EXONT:002630	Multicopper oxidase, type 1	IPR_Domain	EXONT:000002	7
EXONT:002633	Lipid-binding serum glycoprotein, C-terminal	IPR_Domain	EXONT:000005	73
EXONT:002634	Bactericidal permeability-increasing protein, alpha/beta domain	IPR_Domain	EXONT:000005	146
EXONT:002636	DNA-repair protein, UmuC-like	IPR_Domain	EXONT:000002,EXONT:000005	21
EXONT:002639	Peptidase M24B, X-Pro dipeptidase/aminopeptidase P, conserved site	IPR_Site	EXONT:000011	3
EXONT:002640	SMAD domain-like	IPR_Domain	EXONT:000005	53
EXONT:002641	SMAD domain, Dwarfin-type	IPR_Domain	EXONT:000005	21
EXONT:002642	Tissue inhibitor of metalloproteinases-like, OB-fold	IPR_Domain	EXONT:000011	78
EXONT:002643	Netrin domain	IPR_Domain	EXONT:000011,EXONT:000005	65
EXONT:002644	NADH-quinone oxidoreductase, subunit D	IPR_Domain	EXONT:000002,EXONT:000005	11
EXONT:002649	ABC transporter, transmembrane domain	IPR_Domain	EXONT:000004,EXONT:000002,EXONT:000005	216
EXONT:002650	ABC transporter type 1, transmembrane domain	IPR_Domain	EXONT:000004,EXONT:000002,EXONT:000005	272
EXONT:002654	Alpha carbonic anhydrase	IPR_Domain	EXONT:000011	124
EXONT:002660	DIX domain	IPR_Domain	EXONT:000011	16
EXONT:002662	Like-Sm (LSM) domain	IPR_Domain	EXONT:000011	68
EXONT:002663	Ribonucleoprotein LSM domain	IPR_Domain	EXONT:000011	48
EXONT:002664	Glycosyl transferase, family 2	IPR_Domain	EXONT:000011	107
EXONT:002670	Peptidyl-prolyl cis-trans isomerase, FKBP-type, domain	IPR_Domain	EXONT:000011	75
EXONT:002671	Citron-like	IPR_Domain	EXONT:000002	135
EXONT:002672	Speract/scavenger receptor-related	IPR_Domain	EXONT:000011	182
EXONT:002673	SRCR domain	IPR_Domain	EXONT:000003,EXONT:000011	125
EXONT:002676	DENN domain	IPR_Domain	EXONT:000011	95
EXONT:002677	Ribosomal protein L15, conserved site	IPR_Site	EXONT:000011	1
EXONT:002680	Cytochrome b5-like heme/steroid binding domain	IPR_Domain	EXONT:000005	42
EXONT:002681	WW domain	IPR_Domain	EXONT:000005	161
EXONT:002685	Diacylglycerol kinase, catalytic domain	IPR_Domain	EXONT:000002	64
EXONT:002686	Somatomedin B domain	IPR_Domain	EXONT:000003,EXONT:000005	25
EXONT:002687	SET domain	IPR_Domain	EXONT:000005	220
EXONT:002688	Cysteine synthase/cystathionine beta-synthase P-phosphate-binding site	IPR_Site	EXONT:000011,EXONT:000005	1
EXONT:002690	Zinc finger, TFIIS-type	IPR_Domain	EXONT:000005	17
EXONT:002691	Glycoside hydrolase, superfamily	IPR_Domain	EXONT:000011	412
EXONT:002692	Glycoside hydrolase, catalytic domain	IPR_Domain	EXONT:000011	292
EXONT:002693	Glycoside hydrolase, family 18, catalytic domain	IPR_Domain	EXONT:000002,EXONT:000011	49
EXONT:002695	Acyl transferase/acyl hydrolase/lysophospholipase	IPR_Domain	EXONT:000011	131
EXONT:002696	Acyl transferase domain	IPR_Domain	EXONT:000002,EXONT:000011	10
EXONT:002697	2-C-methyl-D-erythritol 4-phosphate cytidylyltransferase	IPR_Domain	EXONT:000002	5
EXONT:002698	Mannose-binding lectin	IPR_Domain	EXONT:000011	5
EXONT:002699	Lactate/malate dehydrogenase, N-terminal	IPR_Domain	EXONT:000002,EXONT:000011	29
EXONT:002705	Serine-threonine/tyrosine-protein kinase catalytic domain	IPR_Domain	EXONT:000002,EXONT:000005	881
EXONT:002706	Ribosomal protein S5 domain 2-type fold	IPR_Domain	EXONT:000011	157
EXONT:002707	Exoribonuclease, phosphorolytic domain 1	IPR_Domain	EXONT:000011	32
EXONT:002708	CRAL-TRIO domain	IPR_Domain	EXONT:000011	189
EXONT:002709	Malate dehydrogenase, active site	IPR_Site	EXONT:000002	3
EXONT:002711	Peptidase S1	IPR_Domain	EXONT:000002	507
EXONT:002714	NHL repeat	IPR_Repeat	EXONT:000005,EXONT:000007	24
EXONT:002715	Proteinase inhibitor I27, calpastatin	IPR_Repeat	EXONT:000011,EXONT:000007	22
EXONT:002716	ArgE/DapE/ACY1/CPG2/YscS, conserved site	IPR_Site	EXONT:000002	12
EXONT:002717	Armadillo-type fold	IPR_Domain	EXONT:000005	4594
EXONT:002718	Phosphoinositide 3-kinase, accessory (PIK) domain	IPR_Domain	EXONT:000005	43
EXONT:002720	NADH:ubiquinone oxidoreductase, 30kDa subunit	IPR_Domain	EXONT:000002	3
EXONT:002721	DM DNA-binding domain	IPR_Domain	EXONT:000005	9
EXONT:002722	Beta-lactamase-like	IPR_Domain	EXONT:000011	126
EXONT:002723	Zinc finger, TRAF-type	IPR_Domain	EXONT:000005	31
EXONT:002726	Dihydroorotate dehydrogenase, conserved site	IPR_Site	EXONT:000002	2
EXONT:002727	Glycosyl transferase, family 1	IPR_Domain	EXONT:000011	20
EXONT:002729	Filamin/ABP280 repeat	IPR_Repeat	EXONT:000005,EXONT:000007	148
EXONT:002731	Peptidase C2, calpain, catalytic domain	IPR_Domain	EXONT:000002	128
EXONT:002732	Class II aldolase/adducin N-terminal	IPR_Domain	EXONT:000011	24
EXONT:002733	C-type lectin	IPR_Domain	EXONT:000011,EXONT:000005	311
EXONT:002735	Heat shock protein DnaJ, cysteine-rich domain	IPR_Domain	EXONT:000005	13
EXONT:002739	Thiosulphate sulfurtransferase, conserved site	IPR_Site	EXONT:000002	4
EXONT:002740	Peptidase C14, ICE, catalytic subunit p20	IPR_Domain	EXONT:000002	46
EXONT:002741	Pumilio RNA-binding repeat	IPR_Repeat	EXONT:000005,EXONT:000007	35
EXONT:002742	CARD domain	IPR_Domain	EXONT:000011	58
EXONT:002745	Ionotropic glutamate receptor	IPR_Domain	EXONT:000004,EXONT:000003	138
EXONT:002752	Lamin Tail Domain	IPR_Domain	EXONT:000011	20
EXONT:002753	Translation elongation factor EF1B, beta/delta chains, conserved site	IPR_Site	EXONT:000005	4
EXONT:002754	Pyridine nucleotide-disulphide oxidoreductase, NAD-binding domain	IPR_Domain	EXONT:000002,EXONT:000005	30
EXONT:002755	Prenyltransferase/squalene oxidase	IPR_Repeat	EXONT:000002,EXONT:000007	29
EXONT:002756	Guanine-nucleotide dissociation stimulator, CDC24, conserved site	IPR_Site	EXONT:000005	32
EXONT:002760	MRNA capping enzyme	IPR_Domain	EXONT:000002	6
EXONT:002768	Phosphoglycerate/bisphosphoglycerate mutase, active site	IPR_Site	EXONT:000002	7
EXONT:002769	Interferon regulatory factor DNA-binding domain	IPR_Domain	EXONT:000011,EXONT:000005	26
EXONT:002772	Sugar isomerase (SIS)	IPR_Domain	EXONT:000005	31
EXONT:002773	Ribosomal protein S3, C-terminal	IPR_Domain	EXONT:000011	3
EXONT:002774	BRCT domain	IPR_Domain	EXONT:000011	144
EXONT:002775	Proteinase inhibitor I25C, fetuin, conserved site	IPR_Site	EXONT:000011	8
EXONT:002776	Adenosine/AMP deaminase domain	IPR_Domain	EXONT:000002	59
EXONT:002779	TNFR/NGFR cysteine-rich region	IPR_Domain	EXONT:000005	93
EXONT:002780	Baculoviral inhibition of apoptosis protein repeat	IPR_Domain	EXONT:000011	35
EXONT:002784	Cullin, N-terminal	IPR_Domain	EXONT:000005	130
EXONT:002785	Single-stranded nucleic acid binding R3H	IPR_Domain	EXONT:000005	31
EXONT:002786	Peptidase S9, prolyl oligopeptidase, catalytic domain	IPR_Domain	EXONT:000002	56
EXONT:002787	Uncharacterised domain UPF0066	IPR_Domain	EXONT:000011	4
EXONT:002790	Cro/C1-type helix-turn-helix domain	IPR_Domain	EXONT:000005	3
EXONT:002791	Synaptobrevin	IPR_Domain	EXONT:000011	35
EXONT:002793	Ubiquitin carboxyl-terminal hydrolase-like domain	IPR_Domain	EXONT:000011	532
EXONT:002794	Peptidase C19, ubiquitin carboxyl-terminal hydrolase	IPR_Domain	EXONT:000002,EXONT:000011	504
EXONT:002796	Dynamin, GTPase domain	IPR_Domain	EXONT:000002,EXONT:000005	77
EXONT:002799	Aminoacyl-tRNA synthetase, class I, conserved site	IPR_Site	EXONT:000002,EXONT:000005	16
EXONT:002801	Lysophospholipase patatin, conserved site	IPR_Site	EXONT:000002	2
EXONT:002804	Superoxide dismutase, copper/zinc binding domain	IPR_Domain	EXONT:000005	11
EXONT:002805	Tyrosine-protein kinase, receptor class V, conserved site	IPR_Site	EXONT:000002,EXONT:000003,EXONT:000005	14
EXONT:002809	Peptidase M16, zinc-binding site	IPR_Site	EXONT:000002,EXONT:000005	10
EXONT:002810	Oxidoreductase FAD/NAD(P)-binding	IPR_Domain	EXONT:000002	41
EXONT:002813	Tetratricopeptide TPR1	IPR_Repeat	EXONT:000005,EXONT:000007	201
EXONT:002814	Collagen IV, non-collagenous	IPR_Repeat	EXONT:000011,EXONT:000007	25
EXONT:002817	4Fe-4S binding domain	IPR_Domain	EXONT:000005	4
EXONT:002818	4Fe-4S ferredoxin-type, iron-sulphur binding domain	IPR_Domain	EXONT:000005	14
EXONT:002819	Bacterial transferase hexapeptide repeat	IPR_Repeat	EXONT:000011,EXONT:000007	11
EXONT:002820	Src homology-3 domain	IPR_Domain	EXONT:000005	749
EXONT:002821	Molybdopterin binding domain	IPR_Domain	EXONT:000011	15
EXONT:002824	Beta-lactamase/transpeptidase-like	IPR_Domain	EXONT:000011	28
EXONT:002834	Beta-lactamase-related	IPR_Domain	EXONT:000011	6
EXONT:002838	DNA-binding domain	IPR_Domain	EXONT:000005	33
EXONT:002839	Clathrin, heavy chain, propeller, N-terminal	IPR_Domain	EXONT:000011	14
EXONT:002840	PDZ domain	IPR_Domain	EXONT:000005	790
EXONT:002846	Bromodomain	IPR_Domain	EXONT:000005	209
EXONT:002852	Importin-beta, N-terminal domain	IPR_Domain	EXONT:000005	52
EXONT:002853	SOCS protein, C-terminal	IPR_Domain	EXONT:000011	55
EXONT:002854	Methylated-DNA-[protein]-cysteine S-methyltransferase, active site	IPR_Site	EXONT:000002	1
EXONT:002857	Impact, N-terminal	IPR_Domain	EXONT:000011	4
EXONT:002861	Peptidase, metallopeptidase	IPR_Domain	EXONT:000002,EXONT:000005	140
EXONT:002862	Peptidase M12A, astacin	IPR_Domain	EXONT:000002,EXONT:000005	31
EXONT:002863	Zona pellucida domain	IPR_Domain	EXONT:000011	84
EXONT:002864	NAD-dependent epimerase/dehydratase	IPR_Domain	EXONT:000002,EXONT:000005	55
EXONT:002865	Zinc finger, PARP-type	IPR_Domain	EXONT:000005	7
EXONT:002866	DNA-directed RNA polymerase, 30-40kDa subunit, conserved site	IPR_Site	EXONT:000002,EXONT:000005	5
EXONT:002871	Fatty acid desaturase, type 1, C-terminal	IPR_Site	EXONT:000002,EXONT:000005	4
EXONT:002872	Paired domain	IPR_Domain	EXONT:000005	28
EXONT:002874	CD59 antigen	IPR_Domain	EXONT:000011	47
EXONT:002882	DNA-directed RNA polymerase, M/15kDa subunit	IPR_Domain	EXONT:000002,EXONT:000005	6
EXONT:002887	TRNA/rRNA methyltransferase, SpoU	IPR_Domain	EXONT:000002,EXONT:000005	11
EXONT:002888	RmlC-like cupin domain	IPR_Domain	EXONT:000011	59
EXONT:002895	Phosphoribosylglycinamide formyltransferase, active site	IPR_Site	EXONT:000002	4
EXONT:002897	Zinc finger, Btk motif	IPR_Site	EXONT:000011	20
EXONT:002898	Synaptotagmin	IPR_Domain	EXONT:000004	59
EXONT:002900	Protein kinase A anchoring, WSK motif	IPR_Domain	EXONT:000011	2
EXONT:002902	Peptidase C12, ubiquitin carboxyl-terminal hydrolase	IPR_Domain	EXONT:000002	46
EXONT:002904	Glycoside hydrolase, chitinase active site	IPR_Site	EXONT:000002	2
EXONT:002905	Ribonuclease H-like domain	IPR_Domain	EXONT:000005	335
EXONT:002906	Integrase, catalytic core	IPR_Domain	EXONT:000005	8
EXONT:002909	Actinin-type, actin-binding, conserved site	IPR_Site	EXONT:000011	54
EXONT:002910	Peptidase M12B, ADAM/reprolysin	IPR_Domain	EXONT:000002	209
EXONT:002911	Zinc finger, DHHC-type, palmitoyltransferase	IPR_Domain	EXONT:000005	134
EXONT:002912	Aromatic amino acid beta-eliminating lyase/threonine aldolase	IPR_Domain	EXONT:000002,EXONT:000011	4
EXONT:002915	Alpha-2-macroglobulin	IPR_Domain	EXONT:000002	30
EXONT:002916	DNA/RNA non-specific endonuclease	IPR_Domain	EXONT:000002,EXONT:000005	30
EXONT:002917	Pleckstrin homology domain, spectrin-type	IPR_Domain	EXONT:000011,EXONT:000005	31
EXONT:002918	Pleckstrin homology domain	IPR_Domain	EXONT:000011	1108
EXONT:002920	ARID/BRIGHT DNA-binding domain	IPR_Domain	EXONT:000005	56
EXONT:002921	Zinc finger, UBP-type	IPR_Domain	EXONT:000005	35
EXONT:002922	Alanine racemase, N-terminal	IPR_Domain	EXONT:000011	8
EXONT:002923	Myosin head, motor domain	IPR_Domain	EXONT:000002,EXONT:000005	648
EXONT:002925	PAC motif	IPR_Repeat	EXONT:000011,EXONT:000007	53
EXONT:002926	Leucine-rich repeat	IPR_Repeat	EXONT:000005,EXONT:000007	745
EXONT:002927	DnaJ domain	IPR_Domain	EXONT:000011	150
EXONT:002928	Sema domain	IPR_Domain	EXONT:000005	297
EXONT:002929	WD40/YVTN repeat-like-containing domain	IPR_Domain	EXONT:000005	2965
EXONT:002930	Zinc finger, nuclear hormone receptor-type	IPR_Domain	EXONT:000005	146
EXONT:002931	Zinc finger, NHR/GATA-type	IPR_Domain	EXONT:000005	144
EXONT:002932	G-protein, beta subunit	IPR_Domain	EXONT:000011	24
EXONT:002935	Extracellular solute-binding protein, family 3	IPR_Domain	EXONT:000004	66
EXONT:002937	Pentapeptide repeat	IPR_Repeat	EXONT:000011,EXONT:000007	13
EXONT:002939	Helicase, C-terminal	IPR_Domain	EXONT:000011	503
EXONT:002940	Gastrin/cholecystokinin peptide hormone	IPR_Domain	EXONT:000005	4
EXONT:002941	Sterile alpha motif/pointed domain	IPR_Domain	EXONT:000011	340
EXONT:002942	Sterile alpha motif domain	IPR_Domain	EXONT:000011,EXONT:000005	241
EXONT:002943	Translation elongation factor EF1B, gamma chain, conserved	IPR_Domain	EXONT:000005	4
EXONT:002947	Phosphoesterase, RecJ-like	IPR_Domain	EXONT:000011	4
EXONT:002948	Alcohol dehydrogenase, iron-type	IPR_Domain	EXONT:000002,EXONT:000005	11
EXONT:002952	GMP synthase, C-terminal	IPR_Domain	EXONT:000002,EXONT:000005	5
EXONT:002954	Bacterial Fmu (Sun)/eukaryotic nucleolar NOL1/Nop2p	IPR_Domain	EXONT:000011	40
EXONT:002955	WD40 repeat	IPR_Repeat	EXONT:000005,EXONT:000007	2140
EXONT:002957	Phox homologous domain	IPR_Domain	EXONT:000005	238
EXONT:002961	Calcitonin peptide-like	IPR_Domain	EXONT:000005	4
EXONT:002962	Flavoprotein pyridine nucleotide cytochrome reductase	IPR_Domain	EXONT:000002	52
EXONT:002964	Phospholipase C, phosphatidylinositol-specific, Y domain	IPR_Domain	EXONT:000002	43
EXONT:002965	Calponin homology domain	IPR_Domain	EXONT:000005	461
EXONT:002968	UDP-glucose/GDP-mannose dehydrogenase, N-terminal	IPR_Domain	EXONT:000002,EXONT:000011,EXONT:000005	4
EXONT:002969	Phospholipase D/Transphosphatidylase	IPR_Domain	EXONT:000002	19
EXONT:002970	Methyl-CpG DNA binding	IPR_Domain	EXONT:000005	30
EXONT:002972	Lipid transport protein, N-terminal	IPR_Domain	EXONT:000004	25
EXONT:002974	S100/Calbindin-D9k, conserved site	IPR_Site	EXONT:000005	24
EXONT:002977	Kinesin, motor domain	IPR_Domain	EXONT:000002,EXONT:000005	345
EXONT:002979	Ribulose-phosphate binding barrel	IPR_Domain	EXONT:000002	12
EXONT:002980	Orotidine 5'-phosphate decarboxylase domain	IPR_Domain	EXONT:000002	4
EXONT:002983	Blood coagulation inhibitor, Disintegrin	IPR_Domain	EXONT:000011	47
EXONT:002984	Rhodanese-like domain	IPR_Domain	EXONT:000011	77
EXONT:002986	Transcription factor, fork head	IPR_Domain	EXONT:000011,EXONT:000005	75
EXONT:002987	Hint domain	IPR_Domain	EXONT:000002	6
EXONT:002989	KA1 domain/Ssp2 C-terminal domain	IPR_Domain	EXONT:000011	14
EXONT:002990	Kinase associated domain 1 (KA1)	IPR_Domain	EXONT:000011	5
EXONT:002991	Delta/Serrate/lag-2 (DSL) protein	IPR_Domain	EXONT:000011	4
EXONT:002992	Zinc finger, LIM-type	IPR_Domain	EXONT:000005	296
EXONT:002994	CheY-like superfamily	IPR_Domain	EXONT:000011	2
EXONT:002995	Signal transduction response regulator, receiver domain	IPR_Domain	EXONT:000011	8
EXONT:002996	Laminin G domain	IPR_Domain	EXONT:000011	467
EXONT:002997	Acylphosphatase-like domain	IPR_Domain	EXONT:000011	6
EXONT:002998	Dihydrofolate reductase-like domain	IPR_Domain	EXONT:000011	7
EXONT:002999	Dihydrofolate reductase domain	IPR_Domain	EXONT:000002,EXONT:000011	7
EXONT:003005	F-box domain	IPR_Domain	EXONT:000005	162
EXONT:003006	Chemokine interleukin-8-like domain	IPR_Domain	EXONT:000005	114
EXONT:003008	Peptidase M10, metallopeptidase	IPR_Domain	EXONT:000002,EXONT:000005	107
EXONT:003009	Tyrosine-protein kinase, receptor class III, conserved site	IPR_Site	EXONT:000002,EXONT:000003,EXONT:000005	9
EXONT:003010	Homeobox protein, antennapedia type, conserved site	IPR_Site	EXONT:000005	16
EXONT:003011	Extracellular ligand-binding receptor	IPR_Domain	EXONT:000011	213
EXONT:003013	Transforming growth factor-beta, C-terminal	IPR_Domain	EXONT:000005	65
EXONT:003014	Anaphylatoxin, complement system	IPR_Domain	EXONT:000011	6
EXONT:003015	Anaphylatoxin, complement system domain	IPR_Domain	EXONT:000011	3
EXONT:003016	Zinc finger, RING-type	IPR_Domain	EXONT:000011,EXONT:000005	560
EXONT:003018	Von Willebrand factor, type D domain	IPR_Domain	EXONT:000011	150
EXONT:003023	DSBA-like thioredoxin domain	IPR_Domain	EXONT:000002	7
EXONT:003024	Phosphatidylethanolamine-binding, conserved site	IPR_Site	EXONT:000011	3
EXONT:003027	B30.2/SPRY domain	IPR_Domain	EXONT:000011	325
EXONT:003028	Death effector domain	IPR_Domain	EXONT:000011,EXONT:000005	17
EXONT:003029	Zinc finger, RanBP2-type	IPR_Domain	EXONT:000005	43
EXONT:003030	Zinc finger, CCHC-type	IPR_Domain	EXONT:000005	68
EXONT:003031	GPCR, family 2, extracellular hormone receptor domain	IPR_Domain	EXONT:000003	82
EXONT:003032	EGF-like calcium-binding domain	IPR_Domain	EXONT:000005	694
EXONT:003033	Biotin-binding site	IPR_Site	EXONT:000011,EXONT:000005	6
EXONT:003035	Cysteine-rich Golgi apparatus protein 1 repeat	IPR_Repeat	EXONT:000011,EXONT:000007	25
EXONT:003036	Guanine-nucleotide dissociation stimulator CDC25	IPR_Domain	EXONT:000005	224
EXONT:003037	Terpenoid cyclases/protein prenyltransferase alpha-alpha toroid	IPR_Domain	EXONT:000011	123
EXONT:003041	Krueppel-associated box	IPR_Domain	EXONT:000005	1045
EXONT:003044	Ribosomal protein S4/S9, N-terminal	IPR_Domain	EXONT:000005	4
EXONT:003045	Aminotransferase, class-II, pyridoxal-phosphate binding site	IPR_Site	EXONT:000002,EXONT:000005	7
EXONT:003049	Tryptophan synthase beta subunit-like PLP-dependent enzymes superfamily	IPR_Domain	EXONT:000011	43
EXONT:003051	Endothelin-like toxin	IPR_Domain	EXONT:000011	7
EXONT:003052	Protein phosphatase 2C (PP2C)-like domain	IPR_Domain	EXONT:000002	107
EXONT:003053	Ras GTPase-activating protein	IPR_Domain	EXONT:000002,EXONT:000011	121
EXONT:003054	UVR domain	IPR_Domain	EXONT:000005	1
EXONT:003055	NADH:ubiquinone oxidoreductase, 51kDa subunit, conserved site	IPR_Site	EXONT:000002,EXONT:000005	3
EXONT:003057	Translation initiation factor SUI1	IPR_Domain	EXONT:000005	18
EXONT:003060	Rossmann-like alpha/beta/alpha sandwich fold	IPR_Domain	EXONT:000011	280
EXONT:003061	Asparagine synthase	IPR_Domain	EXONT:000002,EXONT:000011	10
EXONT:003063	Zinc finger, PHD-type	IPR_Domain	EXONT:000011,EXONT:000005	273
EXONT:003067	Aspartic peptidase, active site	IPR_Site	EXONT:000002	16
EXONT:003070	RNA 3'-terminal phosphate cyclase/enolpyruvate transferase, alpha/beta	IPR_Domain	EXONT:000002	20
EXONT:003075	Peptidase A2A, retrovirus, catalytic	IPR_Domain	EXONT:000002	1
EXONT:003080	Osteonectin-like, conserved site	IPR_Site	EXONT:000011	4
EXONT:003082	Polyadenylate-binding protein/Hyperplastic disc protein	IPR_Domain	EXONT:000005	21
EXONT:003084	Tyrosine-protein kinase, receptor class II, conserved site	IPR_Site	EXONT:000002,EXONT:000003,EXONT:000005	12
EXONT:003085	Gonadotropin-releasing hormone	IPR_Site	EXONT:000005	2
EXONT:003086	Synaptojanin, N-terminal	IPR_Domain	EXONT:000002	58
EXONT:003087	VHS	IPR_Domain	EXONT:000011	54
EXONT:003088	Proteasome/cyclosome repeat	IPR_Repeat	EXONT:000011,EXONT:000007	6
EXONT:003090	Spectrin repeat	IPR_Repeat	EXONT:000005,EXONT:000007	468
EXONT:003091	Carboxylesterase, type B	IPR_Domain	EXONT:000011	126
EXONT:003094	Von Willebrand factor, type A	IPR_Domain	EXONT:000011	555
EXONT:003095	Neurokinin/Substance P	IPR_Domain	EXONT:000011	1
EXONT:003096	Carbohydrate-binding-like fold	IPR_Domain	EXONT:000005	19
EXONT:003097	Carbohydrate binding module family 20	IPR_Domain	EXONT:000005	9
EXONT:003100	EF-hand domain	IPR_Domain	EXONT:000005	766
EXONT:003101	EGF-like, laminin	IPR_Domain	EXONT:000011	333
EXONT:003102	DNA methylase, N-6 adenine-specific, conserved site	IPR_Site	EXONT:000002,EXONT:000005	8
EXONT:003103	DNA-directed DNA polymerase X	IPR_Domain	EXONT:000002,EXONT:000005	40
EXONT:003105	PAP/25A-associated	IPR_Domain	EXONT:000011	20
EXONT:003106	Cold shock protein	IPR_Domain	EXONT:000005	32
EXONT:003107	Cold-shock protein, DNA-binding	IPR_Domain	EXONT:000005	31
EXONT:003108	HSP20-like chaperone	IPR_Domain	EXONT:000011	88
EXONT:003109	Alpha crystallin/Hsp20 domain	IPR_Domain	EXONT:000011	21
EXONT:003110	Thermonuclease active site	IPR_Site	EXONT:000002,EXONT:000005	1
EXONT:003111	Nerve growth factor-related	IPR_Domain	EXONT:000005	4
EXONT:003112	HD/PDEase domain	IPR_Domain	EXONT:000011	127
EXONT:003113	3'5'-cyclic nucleotide phosphodiesterase, catalytic domain	IPR_Domain	EXONT:000002,EXONT:000011	203
EXONT:003116	Nuclear transport factor 2	IPR_Domain	EXONT:000011	41
EXONT:003121	MATH	IPR_Domain	EXONT:000005	32
EXONT:003122	TRAF-like	IPR_Domain	EXONT:000005	74
EXONT:003123	Anti-proliferative protein	IPR_Domain	EXONT:000011	12
EXONT:003124	Protein prenyltransferase, alpha subunit	IPR_Repeat	EXONT:000002,EXONT:000007	19
EXONT:003127	BRCA2 repeat	IPR_Repeat	EXONT:000005,EXONT:000007	1
EXONT:003128	Seminal vesicle protein I	IPR_Repeat	EXONT:000011,EXONT:000007	1
EXONT:003129	Transcription factor, MADS-box	IPR_Domain	EXONT:000005	16
EXONT:003133	DNA breaking-rejoining enzyme, catalytic core	IPR_Domain	EXONT:000005	16
EXONT:003136	Actin-binding, cofilin/tropomyosin type	IPR_Domain	EXONT:000005	56
EXONT:003137	Glutaredoxin	IPR_Domain	EXONT:000004,EXONT:000002	32
EXONT:003138	Ankyrin repeat	IPR_Repeat	EXONT:000005,EXONT:000007	1151
EXONT:003140	Histone H2A	IPR_Domain	EXONT:000005	34
EXONT:003141	Histone core	IPR_Domain	EXONT:000005	78
EXONT:003143	Histone-fold	IPR_Domain	EXONT:000005	162
EXONT:003144	HRDC domain	IPR_Domain	EXONT:000005	9
EXONT:003145	Phospholipid/glycerol acyltransferase	IPR_Domain	EXONT:000002	84
EXONT:003146	CMP/dCMP deaminase, zinc-binding	IPR_Domain	EXONT:000002,EXONT:000005	20
EXONT:003147	Cadherin	IPR_Domain	EXONT:000005	644
EXONT:003148	Cadherin-like	IPR_Domain	EXONT:000005	633
EXONT:003152	Cyclophilin-like peptidyl-prolyl cis-trans isomerase domain	IPR_Domain	EXONT:000002	104
EXONT:003155	Peptidase C14, caspase non-catalytic subunit p10	IPR_Domain	EXONT:000002	34
EXONT:003158	Neuregulin 1-related, C-terminal	IPR_Domain	EXONT:000005	16
EXONT:003159	Ribonuclease H domain	IPR_Domain	EXONT:000002,EXONT:000005	6
EXONT:003160	Plexin	IPR_Repeat	EXONT:000011,EXONT:000007	83
EXONT:003161	Lipase, GDXG, active site	IPR_Site	EXONT:000002	6
EXONT:003162	Low-density lipoprotein (LDL) receptor class A repeat	IPR_Repeat	EXONT:000005,EXONT:000007	261
EXONT:003163	Carbohydrate/puine kinase, PfkB, conserved site	IPR_Site	EXONT:000002	4
EXONT:003164	Phosphotransferase/anion transporter	IPR_Domain	EXONT:000004	67
EXONT:003165	PTS EIIA type-2 domain	IPR_Domain	EXONT:000004	2
EXONT:003166	Fibrinogen, alpha/beta/gamma chain, C-terminal globular domain	IPR_Domain	EXONT:000011	146
EXONT:003168	NB-ARC	IPR_Domain	EXONT:000005	6
EXONT:003170	Chaperonin TCP-1, conserved site	IPR_Site	EXONT:000005	25
EXONT:003171	Dihydroorotase, conserved site	IPR_Site	EXONT:000002	4
EXONT:003174	3-hydroxyisobutyrate dehydrogenase-related, conserved site	IPR_Site	EXONT:000002	1
EXONT:003175	DNA topoisomerase, type IIA, subunit A/C-terminal	IPR_Domain	EXONT:000002,EXONT:000005	20
EXONT:003179	Protein kinase C-like, phorbol ester/diacylglycerol binding	IPR_Domain	EXONT:000011	196
EXONT:003180	Proteinase inhibitor I2, Kunitz metazoa	IPR_Domain	EXONT:000002	44
EXONT:003181	3-beta hydroxysteroid dehydrogenase/isomerase	IPR_Domain	EXONT:000002,EXONT:000011	20
EXONT:003185	Catalase haem-binding site	IPR_Site	EXONT:000005	1
EXONT:003186	Tyrosinase	IPR_Domain	EXONT:000002,EXONT:000011	14
EXONT:003188	Serine/threonine- /dual specificity protein kinase, catalytic domain	IPR_Domain	EXONT:000002,EXONT:000005	2040
EXONT:003189	Aminoacyl-tRNA synthetase, class Ia	IPR_Domain	EXONT:000002,EXONT:000005	88
EXONT:003190	Aminoacyl-tRNA synthetase, class II (G/ H/ P/ S), conserved domain	IPR_Domain	EXONT:000002,EXONT:000005	43
EXONT:003192	Phenylalanyl-tRNA synthetase	IPR_Domain	EXONT:000002,EXONT:000005	12
EXONT:003193	Alcohol dehydrogenase, zinc-type, conserved site	IPR_Site	EXONT:000002,EXONT:000005	7
EXONT:003195	FAD-binding, type 2	IPR_Domain	EXONT:000002,EXONT:000005	36
EXONT:003196	Molybdopterin dehydrogenase, FAD-binding	IPR_Domain	EXONT:000002,EXONT:000005	10
EXONT:003197	Kazal domain	IPR_Domain	EXONT:000005	154
EXONT:003201	Multicopper oxidase, copper-binding site	IPR_Site	EXONT:000005	25
EXONT:003203	Ribosomal protein L6, conserved site-2	IPR_Site	EXONT:000011	1
EXONT:003206	Quinone oxidoreductase/zeta-crystallin, conserved site	IPR_Site	EXONT:000002,EXONT:000005	10
EXONT:003208	Terpene synthase, conserved site	IPR_Site	EXONT:000002	2
EXONT:003209	Defensin propeptide	IPR_Domain	EXONT:000011	4
EXONT:003210	Integrin beta subunit, N-terminal	IPR_Domain	EXONT:000011	86
EXONT:003211	Pyrrolo-quinoline quinone repeat	IPR_Repeat	EXONT:000011,EXONT:000007	2
EXONT:003213	Formyl transferase, N-terminal	IPR_Domain	EXONT:000002	21
EXONT:003216	V-ATPase proteolipid subunit C-like domain	IPR_Domain	EXONT:000004	15
EXONT:003217	Insulin receptor substrate-1, PTB	IPR_Domain	EXONT:000011,EXONT:000005	34
EXONT:003219	Phosphatidylinositol 3-kinase, C2 domain	IPR_Domain	EXONT:000005	39
EXONT:003225	DNA/RNA helicase, ATP-dependent, DEAH-box type, conserved site	IPR_Site	EXONT:000002,EXONT:000005	26
EXONT:003226	Adenosine deaminase/editase	IPR_Domain	EXONT:000002,EXONT:000005	47
EXONT:003227	Peptidase S9B, dipeptidylpeptidase IV N-terminal	IPR_Domain	EXONT:000011	54
EXONT:003228	Peptidase S9, serine active site	IPR_Site	EXONT:000002	9
EXONT:003229	Carbamoyl-phosphate synthase, small subunit N-terminal domain	IPR_Domain	EXONT:000011	9
EXONT:003230	Peptidoglycan binding-like	IPR_Domain	EXONT:000011	49
EXONT:003231	PUA-like domain	IPR_Domain	EXONT:000011	79
EXONT:003232	Pseudouridine synthase/archaeosine transglycosylase	IPR_Domain	EXONT:000011,EXONT:000005	15
EXONT:003233	PWI domain	IPR_Domain	EXONT:000011	13
EXONT:003238	Transposase, Tc1-like	IPR_Domain	EXONT:000002,EXONT:000005	1
EXONT:003243	Phosphatidylinositol-4-phosphate 5-kinase, core	IPR_Domain	EXONT:000002	76
EXONT:003244	Major vault protein, N-terminal	IPR_Repeat	EXONT:000011,EXONT:000007	8
EXONT:003245	Phosphoadenosine phosphosulphate reductase	IPR_Domain	EXONT:000002,EXONT:000011	5
EXONT:003248	N-acetylmuramoyl-L-alanine amidase domain	IPR_Domain	EXONT:000002	20
EXONT:003251	Polysaccharide deacetylase	IPR_Domain	EXONT:000002	5
EXONT:003253	Zinc finger, C2HC-type	IPR_Repeat	EXONT:000005,EXONT:000007	42
EXONT:003260	Fumarylacetoacetase, C-terminal	IPR_Domain	EXONT:000002	18
EXONT:003261	Fumarylacetoacetase, C-terminal-related	IPR_Domain	EXONT:000002	20
EXONT:003267	MaoC-like domain	IPR_Domain	EXONT:000011	5
EXONT:003271	Cell division protein FtsK/SpoIIIE	IPR_Domain	EXONT:000005	2
EXONT:003273	Myogenic basic muscle-specific protein	IPR_Domain	EXONT:000005	4
EXONT:003274	TRNA-binding domain	IPR_Domain	EXONT:000011,EXONT:000005	5
EXONT:003276	Domain of unknown function DUF21	IPR_Domain	EXONT:000011	3
EXONT:003279	Clathrin/coatomer adaptor, adaptin-like, N-terminal	IPR_Domain	EXONT:000011	179
EXONT:003280	Chitin binding domain	IPR_Domain	EXONT:000005	1
EXONT:003281	I/LWEQ domain	IPR_Domain	EXONT:000005	31
EXONT:003284	3'-5' exonuclease domain	IPR_Domain	EXONT:000002,EXONT:000005	24
EXONT:003288	FMN-binding split barrel	IPR_Domain	EXONT:000002,EXONT:000005	13
EXONT:003292	Peptide methionine sulphoxide reductase MsrA	IPR_Domain	EXONT:000002	7
EXONT:003294	Aminoglycoside phosphotransferase	IPR_Domain	EXONT:000002	16
EXONT:003296	Mss4-like	IPR_Domain	EXONT:000011	23
EXONT:003297	Peptide methionine sulphoxide reductase MrsB	IPR_Domain	EXONT:000002,EXONT:000011	12
EXONT:003299	CobQ/CobB/MinD/ParA nucleotide binding domain	IPR_Domain	EXONT:000011	6
EXONT:003301	Macro domain	IPR_Domain	EXONT:000011	59
EXONT:003310	Smr protein/MutS2 C-terminal	IPR_Domain	EXONT:000011	3
EXONT:003314	Quinolinate phosphoribosyl transferase, C-terminal	IPR_Domain	EXONT:000002	22
EXONT:003317	Patatin/Phospholipase A2-related	IPR_Domain	EXONT:000011	34
EXONT:003318	Lysophospholipase, catalytic domain	IPR_Domain	EXONT:000002,EXONT:000011	79
EXONT:003319	STAS domain	IPR_Domain	EXONT:000011	58
EXONT:003320	Poly A polymerase, head domain	IPR_Domain	EXONT:000002,EXONT:000005	3
EXONT:003324	Sulphate adenylyltransferase	IPR_Domain	EXONT:000002	14
EXONT:003325	Importin-alpha, importin-beta-binding domain	IPR_Domain	EXONT:000004	34
EXONT:003326	Zinc finger, A20-type	IPR_Domain	EXONT:000005	11
EXONT:003329	Acyl-CoA oxidase, C-terminal	IPR_Domain	EXONT:000002	21
EXONT:003331	Na dependent nucleoside transporter	IPR_Domain	EXONT:000011	9
EXONT:003334	Nop domain	IPR_Domain	EXONT:000011	12
EXONT:003343	DNA-repair protein Xrcc1, N-terminal	IPR_Domain	EXONT:000011,EXONT:000005	5
EXONT:003345	Dilute	IPR_Domain	EXONT:000005	40
EXONT:003346	HNH nuclease	IPR_Domain	EXONT:000011	7
EXONT:003347	HNH endonuclease	IPR_Domain	EXONT:000002,EXONT:000011,EXONT:000005	2
EXONT:003348	FF domain	IPR_Domain	EXONT:000011	38
EXONT:003349	Nascent polypeptide-associated complex NAC domain	IPR_Domain	EXONT:000011	11
EXONT:003350	PIN domain	IPR_Domain	EXONT:000011	24
EXONT:003351	MOZ/SAS-like protein	IPR_Domain	EXONT:000002	26
EXONT:003352	Cyclin-like	IPR_Domain	EXONT:000011	249
EXONT:003353	Retinoblastoma-associated protein, B-box	IPR_Domain	EXONT:000011	14
EXONT:003354	Retinoblastoma-associated protein, A-box	IPR_Domain	EXONT:000011	18
EXONT:003355	Rof/RNase P-like	IPR_Domain	EXONT:000011	3
EXONT:003356	Ribonuclease P/MRP, subunit p29	IPR_Domain	EXONT:000002,EXONT:000011,EXONT:000005	4
EXONT:003357	ATPase, BadF/BadG/BcrA/BcrD type	IPR_Domain	EXONT:000011	9
EXONT:003358	AMMECR1 domain	IPR_Domain	EXONT:000011	12
EXONT:003361	Translation initiation factor IF2/IF5	IPR_Domain	EXONT:000005	8
EXONT:003362	EVE domain	IPR_Domain	EXONT:000011	6
EXONT:003364	Domain of unknown function DUF59	IPR_Domain	EXONT:000011	7
EXONT:003366	DUF71 domain	IPR_Domain	EXONT:000011	8
EXONT:003372	Prefoldin	IPR_Domain	EXONT:000011	97
EXONT:003373	Prefoldin beta-like	IPR_Domain	EXONT:000011,EXONT:000005	22
EXONT:003374	Mut7-C RNAse domain	IPR_Domain	EXONT:000011	5
EXONT:003375	Ribosomal protein L14	IPR_Domain	EXONT:000011	4
EXONT:003377	Domain of unknown function DUF89	IPR_Domain	EXONT:000011	14
EXONT:003378	TRAM domain	IPR_Domain	EXONT:000011	7
EXONT:003380	Aspartate dehydrogenase	IPR_Domain	EXONT:000002	2
EXONT:003381	ThiJ/PfpI	IPR_Domain	EXONT:000011	10
EXONT:003382	Molybdopterin cofactor biosynthesis C (MoaC) domain	IPR_Domain	EXONT:000011	1
EXONT:003387	Zinc finger, CXXC-type	IPR_Domain	EXONT:000005	17
EXONT:003388	PKD/REJ-like protein	IPR_Domain	EXONT:000011	48
EXONT:003389	BNR repeat	IPR_Repeat	EXONT:000011,EXONT:000007	2
EXONT:003390	Reeler domain	IPR_Domain	EXONT:000011	13
EXONT:003392	Zinc finger, C6HC-type	IPR_Domain	EXONT:000005	62
EXONT:003395	Peptidase M12B, propeptide	IPR_Domain	EXONT:000002,EXONT:000005	108
EXONT:003396	NIF system FeS cluster assembly, NifU, N-terminal	IPR_Domain	EXONT:000005	6
EXONT:003397	Proline dehydrogenase	IPR_Domain	EXONT:000011	15
EXONT:003399	Ribosomal RNA methyltransferase FtsJ domain	IPR_Domain	EXONT:000002	25
EXONT:003404	Proprotein convertase, P	IPR_Domain	EXONT:000002	21
EXONT:003405	Pentatricopeptide repeat	IPR_Repeat	EXONT:000011,EXONT:000007	38
EXONT:003406	[2Fe-2S]-binding	IPR_Domain	EXONT:000002,EXONT:000005	10
EXONT:003407	Carbohydrate-binding WSC	IPR_Domain	EXONT:000011	22
EXONT:003408	Alpha-2-macroglobulin, N-terminal	IPR_Domain	EXONT:000002	33
EXONT:003409	Zinc finger, MYND-type	IPR_Domain	EXONT:000011	35
EXONT:003417	Zinc-binding ribosomal protein	IPR_Domain	EXONT:000011	21
EXONT:003418	Ribosomal protein S27a	IPR_Domain	EXONT:000011	2
EXONT:003419	IPT domain	IPR_Domain	EXONT:000011,EXONT:000005	171
EXONT:003421	ACT domain	IPR_Domain	EXONT:000005	6
EXONT:003422	START domain	IPR_Domain	EXONT:000005	83
EXONT:003424	Trypsin Inhibitor-like, cysteine rich domain	IPR_Domain	EXONT:000011	96
EXONT:003425	Dienelactone hydrolase	IPR_Domain	EXONT:000002	5
EXONT:003426	Myosin tail	IPR_Domain	EXONT:000002	221
EXONT:003427	Transglutaminase-like	IPR_Domain	EXONT:000011	72
EXONT:003431	Nucleotidyl transferase domain	IPR_Domain	EXONT:000002	30
EXONT:003432	Amine oxidase	IPR_Domain	EXONT:000002	85
EXONT:003433	Aromatic-ring hydroxylase-like	IPR_Domain	EXONT:000002	24
EXONT:003434	Monooxygenase, FAD-binding	IPR_Domain	EXONT:000002	24
EXONT:003435	Chaperone DnaJ, C-terminal	IPR_Domain	EXONT:000011	22
EXONT:003437	RNA-binding S4 domain	IPR_Domain	EXONT:000005	11
EXONT:003440	Tudor domain	IPR_Domain	EXONT:000011	127
EXONT:003441	Immunoglobulin/major histocompatibility complex, conserved site	IPR_Site	EXONT:000011	29
EXONT:003442	Tubulin/FtsZ, GTPase domain	IPR_Domain	EXONT:000011	122
EXONT:003443	Carbon-nitrogen hydrolase	IPR_Domain	EXONT:000002	55
EXONT:003444	2-oxo acid dehydrogenase, lipoyl-binding site	IPR_Site	EXONT:000011,EXONT:000005	11
EXONT:003445	GAF domain	IPR_Domain	EXONT:000005	82
EXONT:003446	RNA-binding domain, S1	IPR_Domain	EXONT:000011	62
EXONT:003447	Ribosomal protein S1, RNA-binding domain	IPR_Domain	EXONT:000011,EXONT:000005	48
EXONT:003448	Ryanodine receptor Ryr	IPR_Domain	EXONT:000011	41
EXONT:003449	SCP2 sterol-binding domain	IPR_Domain	EXONT:000011	14
EXONT:003450	SAP domain	IPR_Domain	EXONT:000005	47
EXONT:003458	Cytochrome c domain	IPR_Domain	EXONT:000004,EXONT:000005	3
EXONT:003459	Cytochrome c-like domain	IPR_Domain	EXONT:000004,EXONT:000005	7
EXONT:003460	Alpha-crystallin, N-terminal	IPR_Domain	EXONT:000011	4
EXONT:003461	Apoptosis regulator, Bcl-2 protein, BH4	IPR_Domain	EXONT:000011	3
EXONT:003462	FAD-binding, type 1	IPR_Domain	EXONT:000002	33
EXONT:003463	Ferredoxin reductase-type FAD-binding domain	IPR_Domain	EXONT:000002	84
EXONT:003464	Riboflavin synthase-like beta-barrel	IPR_Domain	EXONT:000002	88
EXONT:003468	Argonaute/Dicer protein, PAZ domain	IPR_Domain	EXONT:000005	67
EXONT:003469	Coactivator CBP, KIX domain	IPR_Domain	EXONT:000005	6
EXONT:003470	Coactivator CBP, pKID	IPR_Domain	EXONT:000005	13
EXONT:003472	BAG domain	IPR_Domain	EXONT:000005	8
EXONT:003474	SRA-YDG	IPR_Domain	EXONT:000005	13
EXONT:003476	RNA-processing protein, HAT helix	IPR_Repeat	EXONT:000011,EXONT:000007	94
EXONT:003477	Growth-arrest-specific protein 2 domain	IPR_Domain	EXONT:000011	18
EXONT:003478	GoLoco motif	IPR_Site	EXONT:000002	18
EXONT:003479	Phosphorylated immunoreceptor signalling ITAM	IPR_Repeat	EXONT:000003,EXONT:000007	21
EXONT:003481	Peptidase S16, lon N-terminal	IPR_Domain	EXONT:000002	29
EXONT:003482	Olfactomedin-like	IPR_Domain	EXONT:000005	27
EXONT:003483	Phosphatidylinositol 3-kinase adaptor-binding (PI3K ABD) domain	IPR_Domain	EXONT:000011	6
EXONT:003484	Phox-associated domain	IPR_Domain	EXONT:000011	23
EXONT:003485	ParB/Sulfiredoxin	IPR_Domain	EXONT:000011	2
EXONT:003486	Raf-like Ras-binding	IPR_Domain	EXONT:000003	20
EXONT:003487	Dimerization-anchoring domain of cAMP-dependent protein kinase, regulatory subunit	IPR_Domain	EXONT:000011	29
EXONT:003488	Pointed domain	IPR_Domain	EXONT:000011,EXONT:000005	36
EXONT:003489	Saposin type A	IPR_Domain	EXONT:000011	5
EXONT:003490	SWIB/MDM2 domain	IPR_Domain	EXONT:000005	28
EXONT:003492	Vacuolar sorting protein 9	IPR_Domain	EXONT:000011	41
EXONT:003493	WH2 domain	IPR_Domain	EXONT:000005	32
EXONT:003495	Zinc finger, N-recognin	IPR_Domain	EXONT:000002,EXONT:000005	21
EXONT:003496	Sorbin-like	IPR_Domain	EXONT:000011	14
EXONT:003497	Villin headpiece	IPR_Domain	EXONT:000005	18
EXONT:003498	GTPase effector domain, GED	IPR_Domain	EXONT:000011	13
EXONT:003499	Dynamin GTPase effector	IPR_Domain	EXONT:000002,EXONT:000011,EXONT:000005	13
EXONT:003500	Potassium channel tetramerisation-type BTB domain	IPR_Domain	EXONT:000011,EXONT:000005	80
EXONT:003506	Hs1/Cortactin	IPR_Repeat	EXONT:000011,EXONT:000007	15
EXONT:003508	Protease-associated domain, PA	IPR_Domain	EXONT:000011	45
EXONT:003510	Phospholipase/carboxylesterase/thioesterase	IPR_Domain	EXONT:000002	24
EXONT:003513	Polymerase/histidinol phosphatase-like	IPR_Domain	EXONT:000002	10
EXONT:003515	Biotin protein ligase, C-terminal	IPR_Domain	EXONT:000011	2
EXONT:003517	Proteinase inhibitor, propeptide	IPR_Domain	EXONT:000011	56
EXONT:003518	Proteinase inhibitor, carboxypeptidase propeptide	IPR_Domain	EXONT:000002,EXONT:000011	32
EXONT:003520	Regulator of K+ conductance, N-terminal	IPR_Domain	EXONT:000011	4
EXONT:003521	Iron hydrogenase, small subunit-like	IPR_Domain	EXONT:000011	2
EXONT:003522	DNA-binding RFX-type winged-helix domain	IPR_Domain	EXONT:000011,EXONT:000005	33
EXONT:003523	PIK-related kinase	IPR_Domain	EXONT:000011	79
EXONT:003524	PIK-related kinase, FAT	IPR_Domain	EXONT:000011,EXONT:000005	43
EXONT:003525	PIK-related kinase, FATC	IPR_Domain	EXONT:000005	8
EXONT:003526	Adaptor protein Cbl, N-terminal helical	IPR_Domain	EXONT:000003	9
EXONT:003527	Phosphoesterase, DHHA1	IPR_Domain	EXONT:000005	2
EXONT:003528	Glycoside hydrolase-type carbohydrate-binding, subgroup	IPR_Domain	EXONT:000002,EXONT:000005	7
EXONT:003530	Galactose mutarotase-like domain	IPR_Domain	EXONT:000002,EXONT:000005	106
EXONT:003532	Coatomer/calthrin adaptor appendage, C-terminal subdomain	IPR_Domain	EXONT:000011	19
EXONT:003533	Clathrin alpha-adaptin/coatomer adaptor, appendage, C-terminal subdomain	IPR_Domain	EXONT:000011	11
EXONT:003534	Clathrin adaptor, alpha-adaptin, appendage, C-terminal subdomain	IPR_Domain	EXONT:000011	8
EXONT:003535	Stem cell self-renewal protein Piwi	IPR_Domain	EXONT:000005	54
EXONT:003536	Transcription factor TFIIE beta subunit, DNA-binding domain	IPR_Domain	EXONT:000011	3
EXONT:003537	GYF	IPR_Domain	EXONT:000005	8
EXONT:003538	MD-2-related lipid-recognition domain	IPR_Domain	EXONT:000011	19
EXONT:003540	Transcriptional coactivator p15 (PC4)	IPR_Domain	EXONT:000005	4
EXONT:003541	SsDNA-binding transcriptional regulator	IPR_Domain	EXONT:000005	4
EXONT:003547	Proteasome activator pa28, N-terminal domain	IPR_Domain	EXONT:000011	12
EXONT:003548	Proteasome activator pa28, C-terminal domain	IPR_Domain	EXONT:000011	22
EXONT:003549	Guanylate-binding protein, C-terminal	IPR_Domain	EXONT:000002,EXONT:000005	56
EXONT:003554	Cobalamin (vitamin B12)-dependent enzyme, catalytic	IPR_Domain	EXONT:000002,EXONT:000005	9
EXONT:003560	Transcription initiation factor TFIID	IPR_Domain	EXONT:000005	4
EXONT:003563	DNA glycosylase	IPR_Domain	EXONT:000002	27
EXONT:003564	HhH-GPD domain	IPR_Domain	EXONT:000002	20
EXONT:003566	WIF domain	IPR_Domain	EXONT:000011	8
EXONT:003567	W2 domain	IPR_Domain	EXONT:000005	36
EXONT:003568	Integrase, N-terminal zinc-binding domain-like	IPR_Domain	EXONT:000011	3
EXONT:003570	Transcription regulator SCAN	IPR_Domain	EXONT:000005	111
EXONT:003573	Transcription factor E2F/dimerisation partner (TDP)	IPR_Domain	EXONT:000011,EXONT:000005	29
EXONT:003579	Ovarian tumour, otubain	IPR_Domain	EXONT:000011	53
EXONT:003581	Leucine zipper, Myc	IPR_Domain	EXONT:000005	1
EXONT:003582	GPCR, family 2, latrophilin, C-terminal	IPR_Domain	EXONT:000003	14
EXONT:003584	Aspartate decarboxylase-like domain	IPR_Domain	EXONT:000011	15
EXONT:003585	CDC48, N-terminal subdomain	IPR_Domain	EXONT:000011	10
EXONT:003590	Glycosyl transferase, family 39	IPR_Domain	EXONT:000002	15
EXONT:003591	Bacterial Ig-like, group 2	IPR_Domain	EXONT:000011	5
EXONT:003594	JmjC domain	IPR_Domain	EXONT:000011	167
EXONT:003595	Transcription factor jumonji, JmjN	IPR_Domain	EXONT:000011	18
EXONT:003596	Homeodomain protein CUT	IPR_Domain	EXONT:000005	24
EXONT:003597	Dishevelled protein domain	IPR_Domain	EXONT:000011	9
EXONT:003614	Thrombospondin, type 3-like repeat	IPR_Repeat	EXONT:000005,EXONT:000007	28
EXONT:003616	Carboxylase, conserved domain	IPR_Domain	EXONT:000011	4
EXONT:003617	Transforming protein Ski	IPR_Domain	EXONT:000011	6
EXONT:003618	Flavoprotein	IPR_Domain	EXONT:000002	5
EXONT:003623	RecF/RecN/SMC, N-terminal	IPR_Domain	EXONT:000011	173
EXONT:003625	MORN motif	IPR_Repeat	EXONT:000011,EXONT:000007	64
EXONT:003626	Hyalin	IPR_Domain	EXONT:000011	15
EXONT:003629	6-phosphogluconate dehydrogenase, C-terminal-like	IPR_Domain	EXONT:000011	47
EXONT:003630	Dehydrogenase, multihelical	IPR_Domain	EXONT:000002,EXONT:000011,EXONT:000005	37
EXONT:003633	ABC transporter-like	IPR_Domain	EXONT:000002,EXONT:000011,EXONT:000005	470
EXONT:003643	CobW/HypB/UreG domain	IPR_Domain	EXONT:000011	15
EXONT:003648	Interleukin-1 propeptide	IPR_Domain	EXONT:000005	9
EXONT:003650	CIDE-N domain	IPR_Domain	EXONT:000011	13
EXONT:003651	DNA-binding HORMA	IPR_Domain	EXONT:000011	29
EXONT:003656	Mitogen-activated protein (MAP) kinase, conserved site	IPR_Site	EXONT:000002,EXONT:000003,EXONT:000005	47
EXONT:003658	Long hematopoietin receptor, single chain, conserved site	IPR_Site	EXONT:000003	6
EXONT:003659	Long hematopoietin receptor, Gp130 family 2, conserved site	IPR_Site	EXONT:000003	14
EXONT:003660	Long hematopoietin receptor, soluble alpha chain, conserved site	IPR_Site	EXONT:000003	10
EXONT:003661	Short hematopoietin receptor, family 1, conserved site	IPR_Site	EXONT:000003	7
EXONT:003662	Short hematopoietin receptor, family 2, conserved site	IPR_Site	EXONT:000003	12
EXONT:003663	Doublecortin domain	IPR_Domain	EXONT:000011	50
EXONT:003666	Macrophage scavenger receptor	IPR_Domain	EXONT:000003	5
EXONT:003667	ShKT domain	IPR_Domain	EXONT:000011	3
EXONT:003668	Helix-hairpin-helix DNA-binding motif, class 1	IPR_Domain	EXONT:000005	19
EXONT:003669	Neurexin/syndecan/glycophorin C	IPR_Domain	EXONT:000011	19
EXONT:003670	Hint domain C-terminal	IPR_Domain	EXONT:000011	3
EXONT:003671	Hint domain N-terminal	IPR_Domain	EXONT:000011	3
EXONT:003672	Leucine-rich repeat, ribonuclease inhibitor subtype	IPR_Repeat	EXONT:000011,EXONT:000007	78
EXONT:003673	Leucine-rich repeat, typical subtype	IPR_Repeat	EXONT:000011,EXONT:000007	286
EXONT:003674	Histidine kinase-like ATPase, ATP-binding domain	IPR_Domain	EXONT:000011	136
EXONT:003675	Protein-tyrosine phosphatase, catalytic	IPR_Domain	EXONT:000002	46
EXONT:003676	Immunoglobulin V-set domain	IPR_Domain	EXONT:000011	238
EXONT:003677	Immunoglobulin V-set, subgroup	IPR_Domain	EXONT:000011	42
EXONT:003678	Immunoglobulin C1-set	IPR_Domain	EXONT:000011	48
EXONT:003679	Immunoglobulin subtype 2	IPR_Domain	EXONT:000011	790
EXONT:003680	Immunoglobulin subtype	IPR_Domain	EXONT:000011	915
EXONT:003681	DNA topoisomerase, type IA, domain 2	IPR_Domain	EXONT:000002,EXONT:000005	2
EXONT:003682	DNA topoisomerase, type IA, DNA-binding	IPR_Domain	EXONT:000002,EXONT:000005	6
EXONT:003683	U2A'/phosphoprotein 32 family A, C-terminal	IPR_Domain	EXONT:000011	16
EXONT:003684	TGF beta receptor, GS motif	IPR_Domain	EXONT:000002,EXONT:000003,EXONT:000005	16
EXONT:003685	Pre-SET zinc-binding sub-group	IPR_Domain	EXONT:000002,EXONT:000005	14
EXONT:003686	Pre-SET domain	IPR_Domain	EXONT:000002,EXONT:000005	16
EXONT:003694	U box domain	IPR_Domain	EXONT:000002,EXONT:000011	20
EXONT:003695	Post-SET domain	IPR_Domain	EXONT:000011	18
EXONT:003696	Transcription factor IIS, N-terminal	IPR_Domain	EXONT:000005	42
EXONT:003697	Transcription elongation factor, TFIIS/CRSP70, N-terminal, sub-type	IPR_Domain	EXONT:000005	22
EXONT:003698	Transcription elongation factor S-II, central domain	IPR_Domain	EXONT:000011	29
EXONT:003699	MAD homology 1, Dwarfin-type	IPR_Domain	EXONT:000011	23
EXONT:003703	Na-Ca exchanger/integrin-beta4	IPR_Domain	EXONT:000011	89
EXONT:003704	Follistatin-like, N-terminal	IPR_Domain	EXONT:000011	32
EXONT:003705	SH3-like domain, bacterial-type	IPR_Domain	EXONT:000011	3
EXONT:003707	Pre-mRNA processing factor 4 (PRP4)-like	IPR_Domain	EXONT:000011	3
EXONT:003708	Splicing factor motif	IPR_Domain	EXONT:000011	5
EXONT:003709	B-box, C-terminal	IPR_Domain	EXONT:000011	62
EXONT:003710	Orange	IPR_Domain	EXONT:000005	12
EXONT:003711	Endonuclease III-like, iron-sulphur cluster loop motif	IPR_Site	EXONT:000005	2
EXONT:003712	Ataxin, AXH domain	IPR_Domain	EXONT:000005	6
EXONT:003713	Ataxin-1/HBP1 module (AXH)	IPR_Domain	EXONT:000005	7
EXONT:003714	OAR domain	IPR_Domain	EXONT:000011	15
EXONT:003715	Krueppel-associated box-related	IPR_Domain	EXONT:000005	22
EXONT:003716	Zinc finger, BED-type predicted	IPR_Domain	EXONT:000005	5
EXONT:003720	Signal transduction histidine kinase EnvZ-like, dimerisation/phosphoacceptor domain	IPR_Domain	EXONT:000002,EXONT:000003	3
EXONT:003722	Flavodoxin-like fold	IPR_Domain	EXONT:000011	5
EXONT:003734	Homocysteine S-methyltransferase	IPR_Domain	EXONT:000002	31
EXONT:003737	Thioesterase superfamily	IPR_Domain	EXONT:000011	30
EXONT:003738	Phenylacetic acid degradation-related domain	IPR_Domain	EXONT:000011	2
EXONT:003739	5-formyltetrahydrofolate cyclo-ligase-like domain	IPR_Domain	EXONT:000011	11
EXONT:003742	Tetrapyrrole biosynthesis, uroporphyrinogen III synthase	IPR_Domain	EXONT:000002	9
EXONT:003744	Cobalamin (vitamin B12)-binding module, cap domain	IPR_Domain	EXONT:000002,EXONT:000005	3
EXONT:003747	Ribosomal protein L7/L12, C-terminal/adaptor protein ClpS-like	IPR_Domain	EXONT:000011	10
EXONT:003748	Adaptor protein ClpS, core	IPR_Domain	EXONT:000011	6
EXONT:003754	CoA-binding	IPR_Domain	EXONT:000011,EXONT:000005	6
EXONT:003757	Aspartyl/glutamyl-tRNA amidotransferase subunit B-related	IPR_Domain	EXONT:000002	5
EXONT:003758	Nitrogen regulatory PII-like, alpha/beta	IPR_Domain	EXONT:000011	5
EXONT:003762	ATP-grasp fold	IPR_Domain	EXONT:000005	75
EXONT:003766	Fido domain	IPR_Domain	EXONT:000011	1
EXONT:003767	Tubulin/FtsZ, 2-layer sandwich domain	IPR_Domain	EXONT:000002,EXONT:000005	35
EXONT:003769	Paired amphipathic helix	IPR_Repeat	EXONT:000011,EXONT:000007	20
EXONT:003771	TRNA wybutosine-synthesizing protein	IPR_Domain	EXONT:000011	6
EXONT:003772	Pirin, N-terminal domain	IPR_Domain	EXONT:000011	4
EXONT:003784	Domain of unknown function DUF221	IPR_Domain	EXONT:000011	30
EXONT:003789	SPla/RYanodine receptor SPRY	IPR_Domain	EXONT:000005	173
EXONT:003790	Butyrophylin-like	IPR_Domain	EXONT:000011	137
EXONT:003792	Factor I / membrane attack complex	IPR_Domain	EXONT:000011	7
EXONT:003793	Nidogen, extracellular domain	IPR_Domain	EXONT:000011	18
EXONT:003794	LEM/LEM-like domain	IPR_Domain	EXONT:000011	14
EXONT:003795	LEM domain	IPR_Domain	EXONT:000011	10
EXONT:003796	FY-rich, N-terminal	IPR_Domain	EXONT:000011	11
EXONT:003797	FY-rich, C-terminal	IPR_Domain	EXONT:000011	17
EXONT:003798	MIF4G-like, type 3	IPR_Domain	EXONT:000005	59
EXONT:003799	Initiation factor eIF-4 gamma, MA3	IPR_Domain	EXONT:000011	27
EXONT:003800	Ubiquitin system component Cue	IPR_Domain	EXONT:000005	18
EXONT:003801	Iroquois-class homeodomain protein	IPR_Domain	EXONT:000005	6
EXONT:003802	TAFH/NHR1	IPR_Domain	EXONT:000005	15
EXONT:003804	Ubiquitin interacting motif	IPR_Site	EXONT:000011	50
EXONT:003805	Fumarate reductase/succinate dehydrogenase, FAD-binding site	IPR_Site	EXONT:000002,EXONT:000005	2
EXONT:003806	FAD binding domain	IPR_Domain	EXONT:000011	10
EXONT:003807	RNA recognition motif domain, eukaryote	IPR_Domain	EXONT:000005	23
EXONT:003808	Transcription factor, NFYB/HAP3, conserved site	IPR_Site	EXONT:000005	1
EXONT:003809	Transcription factor CBF/NF-Y/archaeal histone	IPR_Domain	EXONT:000005	19
EXONT:003810	ATPase, AAA-type, core	IPR_Domain	EXONT:000011,EXONT:000005	199
EXONT:003811	ATPase, AAA-type, conserved site	IPR_Site	EXONT:000005	42
EXONT:003812	Fibronectin, type III	IPR_Domain	EXONT:000011,EXONT:000005	1445
EXONT:003815	Intercellular adhesion molecule/vascular cell adhesion molecule, N-terminal	IPR_Domain	EXONT:000011	14
EXONT:003816	Intercellular adhesion molecule	IPR_Domain	EXONT:000011	4
EXONT:003817	Treacher Collins syndrome, treacle	IPR_Domain	EXONT:000011	15
EXONT:003818	Actin, conserved site	IPR_Site	EXONT:000011	20
EXONT:003821	Dak kinase	IPR_Domain	EXONT:000002	10
EXONT:003822	DhaL domain	IPR_Domain	EXONT:000002	6
EXONT:003823	Myosin, N-terminal, SH3-like	IPR_Domain	EXONT:000002,EXONT:000005	18
EXONT:003824	Cache domain	IPR_Domain	EXONT:000011	23
EXONT:003826	RUN	IPR_Domain	EXONT:000011	94
EXONT:003827	Cation-transporting P-type ATPase, N-terminal	IPR_Domain	EXONT:000011	49
EXONT:003828	SKI-interacting protein SKIP, SNW domain	IPR_Domain	EXONT:000011	6
EXONT:003830	RPEL repeat	IPR_Repeat	EXONT:000011,EXONT:000007	38
EXONT:003832	DAPIN domain	IPR_Domain	EXONT:000011	33
EXONT:003833	HIN-200/IF120x	IPR_Domain	EXONT:000011	15
EXONT:003834	DDT domain superfamily	IPR_Domain	EXONT:000011	6
EXONT:003835	DDT domain	IPR_Domain	EXONT:000011	5
EXONT:003842	Nitric oxide synthase, oxygenase domain	IPR_Domain	EXONT:000002	30
EXONT:003843	Endonuclease III, iron-sulphur binding site	IPR_Site	EXONT:000011,EXONT:000005	1
EXONT:003844	Endonuclease III-like, conserved site-2	IPR_Site	EXONT:000011	2
EXONT:003845	Ribosomal protein L7Ae conserved site	IPR_Site	EXONT:000011	2
EXONT:003846	Ribosomal protein L7Ae/L30e/S12e/Gadd45	IPR_Domain	EXONT:000011	30
EXONT:003847	Rubredoxin-type fold	IPR_Domain	EXONT:000011	4
EXONT:003850	LCCL domain	IPR_Domain	EXONT:000011	34
EXONT:003851	K Homology domain, type 2	IPR_Domain	EXONT:000005	3
EXONT:003852	K Homology domain	IPR_Domain	EXONT:000005	202
EXONT:003853	Glutathione S-transferase, N-terminal	IPR_Domain	EXONT:000011,EXONT:000005	77
EXONT:003854	Glutathione S-transferase, C-terminal-like	IPR_Domain	EXONT:000011	135
EXONT:003855	Glutathione S-transferase, C-terminal	IPR_Domain	EXONT:000011	51
EXONT:003857	Meiosis-specific protein Spo11	IPR_Domain	EXONT:000005	2
EXONT:003858	K Homology domain, type 1	IPR_Domain	EXONT:000005	180
EXONT:003861	Mbt repeat	IPR_Repeat	EXONT:000011,EXONT:000007	85
EXONT:003862	Hirudin/antistatin	IPR_Domain	EXONT:000002	3
EXONT:003863	Antistasin-like domain	IPR_Domain	EXONT:000002	4
EXONT:003864	TGS-like	IPR_Domain	EXONT:000011	19
EXONT:003865	TGS	IPR_Domain	EXONT:000011	14
EXONT:003867	DHHA2	IPR_Domain	EXONT:000002	8
EXONT:003868	Prp18	IPR_Domain	EXONT:000011	6
EXONT:003869	FAD/NAD-linked reductase, dimerisation domain	IPR_Domain	EXONT:000002,EXONT:000005	34
EXONT:003870	Pyridine nucleotide-disulphide oxidoreductase, dimerisation domain	IPR_Domain	EXONT:000002,EXONT:000005	34
EXONT:003871	ATPase, F1 complex alpha/beta subunit, N-terminal domain	IPR_Domain	EXONT:000011	13
EXONT:003872	Mur ligase, C-terminal	IPR_Domain	EXONT:000002,EXONT:000005	4
EXONT:003874	Poly(ADP-ribose) polymerase, regulatory domain	IPR_Domain	EXONT:000002	19
EXONT:003877	Oxidoreductase, C-terminal	IPR_Domain	EXONT:000002	1
EXONT:003880	Iron hydrogenase, large subunit, C-terminal	IPR_Domain	EXONT:000011	18
EXONT:003882	Tetracycline transcriptional regulator, TetR-like, C-terminal	IPR_Domain	EXONT:000005	2
EXONT:003884	FAD-linked oxidase, C-terminal	IPR_Domain	EXONT:000002,EXONT:000005	21
EXONT:003885	FAD-linked oxidase-like, C-terminal	IPR_Domain	EXONT:000002,EXONT:000005	22
EXONT:003886	THUMP	IPR_Domain	EXONT:000005	8
EXONT:003887	GAD domain	IPR_Domain	EXONT:000002,EXONT:000005	5
EXONT:003893	Signal recognition particle, SRP54 subunit, M-domain	IPR_Domain	EXONT:000005	4
EXONT:003894	Ly-6 antigen / uPA receptor -like	IPR_Domain	EXONT:000011	40
EXONT:003895	Phospholipase A2 inhibitor	IPR_Domain	EXONT:000002,EXONT:000011	2
EXONT:003898	Prefoldin alpha-like	IPR_Domain	EXONT:000011,EXONT:000005	21
EXONT:003899	DAN	IPR_Domain	EXONT:000011	10
EXONT:003904	Biotin/lipoate A/B protein ligase	IPR_Domain	EXONT:000011	8
EXONT:003907	UbiB domain	IPR_Domain	EXONT:000002	20
EXONT:003908	BAR domain	IPR_Domain	EXONT:000011,EXONT:000005	135
EXONT:003909	Arfaptin homology (AH) domain/BAR domain	IPR_Domain	EXONT:000011	206
EXONT:003910	Arfaptin homology (AH) domain	IPR_Domain	EXONT:000011,EXONT:000005	37
EXONT:003917	GAT	IPR_Domain	EXONT:000011	33
EXONT:003918	CXCXC repeat	IPR_Repeat	EXONT:000011,EXONT:000007	1
EXONT:003919	Anticodon-binding	IPR_Domain	EXONT:000011	53
EXONT:003920	PBS lyase HEAT-like repeat	IPR_Repeat	EXONT:000011,EXONT:000007	4
EXONT:003921	Translation elongation factor EF1A/initiation factor IF2gamma, C-terminal	IPR_Domain	EXONT:000011	25
EXONT:003922	Translation elongation factor EFTu/EF1A, C-terminal	IPR_Domain	EXONT:000011,EXONT:000005	22
EXONT:003923	Translation protein, beta-barrel domain	IPR_Domain	EXONT:000011	105
EXONT:003924	Translation elongation factor EFTu/EF1A, domain 2	IPR_Domain	EXONT:000011,EXONT:000005	37
EXONT:003925	Coenzyme A transferase binding site	IPR_Site	EXONT:000002,EXONT:000005	2
EXONT:003927	Coenzyme A transferase active site	IPR_Site	EXONT:000002	1
EXONT:003928	MHCK/EF2 kinase	IPR_Domain	EXONT:000002,EXONT:000005	34
EXONT:003929	E3 binding	IPR_Domain	EXONT:000002	8
EXONT:003931	WWE domain	IPR_Domain	EXONT:000011	29
EXONT:003932	L27	IPR_Domain	EXONT:000005	52
EXONT:003935	DDHD	IPR_Domain	EXONT:000005	33
EXONT:003937	Calmodulin-binding domain	IPR_Domain	EXONT:000004,EXONT:000005	17
EXONT:003943	Sec63 domain	IPR_Domain	EXONT:000011	58
EXONT:003944	Zinc finger, MIZ-type	IPR_Domain	EXONT:000005	24
EXONT:003945	GRAM domain	IPR_Domain	EXONT:000011	57
EXONT:003951	TRNA-binding arm	IPR_Domain	EXONT:000005	10
EXONT:003956	Integrase, Tn916-type, N-terminal DNA binding	IPR_Domain	EXONT:000002,EXONT:000005	3
EXONT:003960	Ubiquinol cytochrome reductase, transmembrane domain	IPR_Domain	EXONT:000004,EXONT:000002	1
EXONT:003961	Glycoside hydrolase, family 13, N-terminal	IPR_Domain	EXONT:000002	3
EXONT:003963	Zinc finger, C5HC2-type	IPR_Domain	EXONT:000011	11
EXONT:003967	CDC48, domain 2	IPR_Domain	EXONT:000011	5
EXONT:003968	CYTH-like domain	IPR_Domain	EXONT:000011	2
EXONT:003976	GTF2I-like repeat	IPR_Repeat	EXONT:000011,EXONT:000007	48
EXONT:003980	Tim10/DDP family zinc finger	IPR_Domain	EXONT:000011	12
EXONT:003982	Vitamin B12-dependent methionine synthase, activation domain	IPR_Domain	EXONT:000002	9
EXONT:003983	Formiminotransferase catalytic domain	IPR_Domain	EXONT:000002,EXONT:000005	9
EXONT:003986	Globular protein, non-globular alpha/beta subunit	IPR_Domain	EXONT:000011	1
EXONT:004004	Dynein heavy chain domain	IPR_Domain	EXONT:000002	195
EXONT:004005	NLI interacting factor	IPR_Domain	EXONT:000005	47
EXONT:004011	Haem oxygenase-like, multi-helical	IPR_Domain	EXONT:000011	8
EXONT:004017	BRO1 domain	IPR_Domain	EXONT:000011	56
EXONT:004019	SPX, N-terminal	IPR_Domain	EXONT:000011	5
EXONT:004023	EXS, C-terminal	IPR_Domain	EXONT:000011	7
EXONT:004024	Plus-3	IPR_Domain	EXONT:000005	4
EXONT:004026	Signal transduction histidine kinase-related protein, C-terminal	IPR_Domain	EXONT:000002	3
EXONT:004027	Glyoxalase/fosfomycin resistance/dioxygenase domain	IPR_Domain	EXONT:000011	10
EXONT:004028	Aminoacyl-tRNA synthetase, class II (D/K/N)	IPR_Domain	EXONT:000002,EXONT:000005	50
EXONT:004029	Aminoacyl-tRNA synthetase, class II	IPR_Domain	EXONT:000002	131
EXONT:004030	OB-fold nucleic acid binding domain, AA-tRNA synthetase-type	IPR_Domain	EXONT:000011,EXONT:000005	34
EXONT:004031	Cyclin, C-terminal domain	IPR_Domain	EXONT:000011	51
EXONT:004032	Tautomerase/MIF superfamily	IPR_Domain	EXONT:000011	10
EXONT:004041	YjeF N-terminal domain	IPR_Domain	EXONT:000011	19
EXONT:004042	Zinc finger, ZPR1-type	IPR_Domain	EXONT:000005	14
EXONT:004044	Orotate phosphoribosyl transferase domain	IPR_Domain	EXONT:000002,EXONT:000011	3
EXONT:004051	Competence protein ComEA, helix-hairpin-helix domain	IPR_Domain	EXONT:000011	1
EXONT:004052	NTP pyrophosphohydrolase MazG, putative catalytic core	IPR_Domain	EXONT:000011	2
EXONT:004053	Uncharacterised domain CHP00451	IPR_Domain	EXONT:000011,EXONT:000005	7
EXONT:004054	1-acyl-sn-glycerol-3-phosphate acyltransferase	IPR_Domain	EXONT:000002	9
EXONT:004061	4'-phosphopantetheinyl transferase superfamily	IPR_Domain	EXONT:000002,EXONT:000005	5
EXONT:004062	TFIIH C1-like domain	IPR_Domain	EXONT:000005	2
EXONT:004073	Citrate transporter-like domain	IPR_Domain	EXONT:000011	13
EXONT:004080	GMP synthase, N-terminal	IPR_Domain	EXONT:000002,EXONT:000005	5
EXONT:004084	Cation/H+ exchanger	IPR_Domain	EXONT:000004	122
EXONT:004091	Cytidyltransferase-like domain	IPR_Domain	EXONT:000002	43
EXONT:004092	TATA box binding protein associated factor (TAF)	IPR_Domain	EXONT:000005	4
EXONT:004093	Basic leucine zipper domain, Maf-type	IPR_Domain	EXONT:000005	12
EXONT:004094	Basic-leucine zipper domain	IPR_Domain	EXONT:000005	84
EXONT:004097	Sodium/calcium exchanger membrane region	IPR_Domain	EXONT:000011	61
EXONT:004098	Aminotransferases, class-I, pyridoxal-phosphate-binding site	IPR_Site	EXONT:000002,EXONT:000005	5
EXONT:004099	Aminotransferase, class I/classII	IPR_Domain	EXONT:000011,EXONT:000005	166
EXONT:004101	Amino acid permease/ SLC12A domain	IPR_Domain	EXONT:000011	119
EXONT:004102	Phosphoesterase domain	IPR_Domain	EXONT:000002	134
EXONT:004104	Agrin NtA	IPR_Domain	EXONT:000011,EXONT:000005	3
EXONT:004108	Triose-phosphate transporter domain	IPR_Domain	EXONT:000011	34
EXONT:004109	Putative 5-3 exonuclease	IPR_Domain	EXONT:000002,EXONT:000005	15
EXONT:004112	Sp100	IPR_Domain	EXONT:000011	15
EXONT:004114	Glycoside hydrolase, family 2/20, immunoglobulin-like beta-sandwich domain	IPR_Domain	EXONT:000002	6
EXONT:004117	Membrane transport protein, MMPL domain	IPR_Domain	EXONT:000011	3
EXONT:004118	Cleavage/polyadenylation specificity factor, A subunit, C-terminal	IPR_Domain	EXONT:000005	25
EXONT:004121	Cytochrome b561, eukaryote	IPR_Domain	EXONT:000011	16
EXONT:004122	Domain of unknown function DUF255	IPR_Domain	EXONT:000011	5
EXONT:004124	Pre-ATP-grasp domain	IPR_Domain	EXONT:000011	57
EXONT:004125	Glutathione synthase, substrate-binding, eukaryotic	IPR_Domain	EXONT:000002,EXONT:000011,EXONT:000005	6
EXONT:004138	Anaphase-promoting complex, subunit 10/DOC domain	IPR_Domain	EXONT:000011	31
EXONT:004140	EB1, C-terminal	IPR_Domain	EXONT:000005	9
EXONT:004142	MRNA (guanine-N(7))-methyltransferase domain	IPR_Domain	EXONT:000011	10
EXONT:004144	Aldehyde-lyase domain	IPR_Domain	EXONT:000002	6
EXONT:004146	DOMON domain	IPR_Domain	EXONT:000011	13
EXONT:004150	Dicer dimerisation domain	IPR_Domain	EXONT:000002	4
EXONT:004151	Putative phosphatase regulatory subunit	IPR_Domain	EXONT:000005	6
EXONT:004154	CAS/CSE, C-terminal	IPR_Domain	EXONT:000005	19
EXONT:004158	Domain of unknown function DUF292, eukaryotic	IPR_Domain	EXONT:000011	5
EXONT:004159	Moybdenum cofactor oxidoreductase, dimerisation	IPR_Domain	EXONT:000002,EXONT:000011,EXONT:000005	1
EXONT:004169	Transcription elongation factor Spt5, NGN domain	IPR_Domain	EXONT:000011	3
EXONT:004171	DNA photolyase, FAD-binding/Cryptochrome, C-terminal	IPR_Domain	EXONT:000002	12
EXONT:004177	Aspartate/homoserine dehydrogenase, NAD-binding	IPR_Domain	EXONT:000002,EXONT:000005	4
EXONT:004178	CO dehydrogenase flavoprotein, C-terminal	IPR_Domain	EXONT:000011	4
EXONT:004179	HELP	IPR_Domain	EXONT:000011	20
EXONT:004180	MoeA, N-terminal and linker domain	IPR_Domain	EXONT:000011	6
EXONT:004181	MoeA, C-terminal, domain IV	IPR_Domain	EXONT:000011	3
EXONT:004182	DDENN domain	IPR_Domain	EXONT:000011	36
EXONT:004183	UDENN domain	IPR_Domain	EXONT:000011	55
EXONT:004189	Regulator of nonsense-mediated decay, UPF3	IPR_Domain	EXONT:000011	14
EXONT:004190	Phenylalanine-tRNA ligase, beta subunit, ferrodoxin-fold anticodon-binding	IPR_Domain	EXONT:000002,EXONT:000005	4
EXONT:004191	Uracil-DNA glycosylase-like	IPR_Domain	EXONT:000011	14
EXONT:004192	Oxoglutarate/iron-dependent dioxygenase	IPR_Domain	EXONT:000002	73
EXONT:004204	Peptide chain release factor	IPR_Domain	EXONT:000005	9
EXONT:004205	ERF1 domain 1/Pelota-like	IPR_Domain	EXONT:000011	5
EXONT:004206	ERF1 domain 2	IPR_Domain	EXONT:000011	5
EXONT:004207	ERF1 domain 3	IPR_Domain	EXONT:000011	6
EXONT:004209	ATP-cone	IPR_Domain	EXONT:000011	3
EXONT:004211	B3/B4 tRNA-binding domain	IPR_Domain	EXONT:000002,EXONT:000005	11
EXONT:004212	TRNA synthetase, B5-domain	IPR_Domain	EXONT:000005	3
EXONT:004213	Arginyl tRNA synthetase N-terminal domain	IPR_Domain	EXONT:000002,EXONT:000005	9
EXONT:004216	Interphotoreceptor retinol-binding	IPR_Domain	EXONT:000002	4
EXONT:004222	Ku70/Ku80 C-terminal arm	IPR_Domain	EXONT:000002,EXONT:000005	8
EXONT:004223	Ku70/Ku80, N-terminal alpha/beta	IPR_Domain	EXONT:000011	11
EXONT:004224	Retrotransposon gag domain	IPR_Domain	EXONT:000011	2
EXONT:004233	CRC domain	IPR_Domain	EXONT:000011	8
EXONT:004234	DMRTA motif	IPR_Domain	EXONT:000011	3
EXONT:004236	Potentiating neddylation domain	IPR_Domain	EXONT:000011	30
EXONT:004238	Domain of unknown function DUF303, acetylesterase putative	IPR_Domain	EXONT:000011	7
EXONT:004244	Focal adhesion kinase, targeting (FAT) domain	IPR_Domain	EXONT:000002,EXONT:000003	7
EXONT:004248	Glycoside hydrolase, family 65, central catalytic	IPR_Domain	EXONT:000002	11
EXONT:004251	Glycoside hydrolase, family 85	IPR_Domain	EXONT:000002	8
EXONT:004260	Small GTP-binding protein domain	IPR_Domain	EXONT:000005	693
EXONT:004266	Molybdenum cofactor sulfurase, C-terminal	IPR_Domain	EXONT:000002,EXONT:000005	11
EXONT:004267	MOSC, N-terminal beta barrel	IPR_Domain	EXONT:000011	6
EXONT:004275	Ribosomal protein S5 domain 2-type fold, subgroup	IPR_Domain	EXONT:000011	87
EXONT:004276	Ribosomal protein S5, C-terminal	IPR_Domain	EXONT:000011	2
EXONT:004278	Plectin/S10, N-terminal	IPR_Domain	EXONT:000011	3
EXONT:004279	Sorting nexin, N-terminal	IPR_Domain	EXONT:000011	8
EXONT:004286	Tubby, N-terminal	IPR_Domain	EXONT:000011	12
EXONT:004287	Signal transduction histidine kinase, core	IPR_Domain	EXONT:000011	25
EXONT:004289	Transketolase, N-terminal	IPR_Domain	EXONT:000011	15
EXONT:004290	Transketolase-like, pyrimidine-binding domain	IPR_Domain	EXONT:000011	41
EXONT:004291	Transketolase, C-terminal	IPR_Domain	EXONT:000002	16
EXONT:004292	Carbamoyl-phosphate synthetase large subunit-like, ATP-binding domain	IPR_Domain	EXONT:000005	43
EXONT:004293	Carbamoyl-phosphate synthetase, large subunit oligomerisation domain	IPR_Domain	EXONT:000011	8
EXONT:004294	Carbamoyl-phosphate synthase, large subunit, N-terminal	IPR_Domain	EXONT:000002,EXONT:000011	30
EXONT:004295	Rudiment single hybrid motif	IPR_Domain	EXONT:000011	17
EXONT:004296	Biotin carboxylase, C-terminal	IPR_Domain	EXONT:000002,EXONT:000011	15
EXONT:004297	Carbamoyl-phosphate synthase large subunit, CPSase domain	IPR_Domain	EXONT:000005	29
EXONT:004298	Glucokinase regulatory, conserved site	IPR_Site	EXONT:000011	2
EXONT:004300	EMSY N-terminal	IPR_Domain	EXONT:000011	5
EXONT:004301	Leucine-rich glioma-inactivated , EPTP repeat	IPR_Repeat	EXONT:000011,EXONT:000007	19
EXONT:004308	Translation elongation factor EFG/EF2, domain IV	IPR_Domain	EXONT:000011,EXONT:000005	15
EXONT:004313	Cyclase-associated protein CAP/septum formation inhibitor MinC, C-terminal	IPR_Domain	EXONT:000011	14
EXONT:004318	Formylglycine-generating sulphatase enzyme domain	IPR_Domain	EXONT:000011	19
EXONT:004319	AMOP	IPR_Domain	EXONT:000011	12
EXONT:004324	PBX	IPR_Domain	EXONT:000005	18
EXONT:004326	Dimeric alpha-beta barrel	IPR_Domain	EXONT:000011	39
EXONT:004330	CG-1 DNA-binding domain	IPR_Domain	EXONT:000005	8
EXONT:004335	Ribosomal protein L6, N-terminal	IPR_Domain	EXONT:000011	2
EXONT:004336	RNA polymerase, Rpb5, N-terminal	IPR_Domain	EXONT:000002,EXONT:000005	4
EXONT:004340	RNA polymerase Rpb7, N-terminal	IPR_Domain	EXONT:000002	9
EXONT:004345	BSD	IPR_Domain	EXONT:000011	9
EXONT:004346	CCAAT-binding factor	IPR_Domain	EXONT:000011	15
EXONT:004347	Actin interacting protein 3, C-terminal	IPR_Domain	EXONT:000011	6
EXONT:004349	Groucho/TLE, N-terminal Q-rich domain	IPR_Domain	EXONT:000005	39
EXONT:004352	Terpenoid synthase	IPR_Domain	EXONT:000011	48
EXONT:004354	Ribosomal protein L23/L25, N-terminal	IPR_Domain	EXONT:000011	1
EXONT:004355	Inner centromere protein, ARK-binding domain	IPR_Domain	EXONT:000011	2
EXONT:004356	DTW	IPR_Domain	EXONT:000011	10
EXONT:004357	UBA-like	IPR_Domain	EXONT:000005	141
EXONT:004358	TAP C-terminal (TAP-C) domain	IPR_Domain	EXONT:000005	13
EXONT:004361	Hepatic lectin, N-terminal	IPR_Domain	EXONT:000011	15
EXONT:004368	Dihydroorotate dehydrogenase domain	IPR_Domain	EXONT:000002	8
EXONT:004370	Zinc finger, LSD1-type	IPR_Domain	EXONT:000011	2
EXONT:004371	Disulphide isomerase	IPR_Domain	EXONT:000002,EXONT:000011	31
EXONT:004372	Thioredoxin domain	IPR_Domain	EXONT:000011	137
EXONT:004373	Formyl transferase, C-terminal-like	IPR_Domain	EXONT:000002	16
EXONT:004374	Formyl transferase, C-terminal	IPR_Domain	EXONT:000002	13
EXONT:004380	Fatty acid desaturase, type 1	IPR_Domain	EXONT:000011	47
EXONT:004381	Rieske [2Fe-2S] iron-sulphur domain	IPR_Domain	EXONT:000002,EXONT:000005	14
EXONT:004382	Rieske iron-sulphur protein, C-terminal	IPR_Domain	EXONT:000004,EXONT:000002,EXONT:000005	1
EXONT:004383	ATP-citrate lyase/succinyl-CoA ligase	IPR_Domain	EXONT:000002,EXONT:000011	18
EXONT:004384	Succinyl-CoA synthetase-like	IPR_Domain	EXONT:000011	28
EXONT:004385	Linker histone H1/H5, domain H15	IPR_Domain	EXONT:000011,EXONT:000005	21
EXONT:004386	Ion transport domain	IPR_Domain	EXONT:000004	749
EXONT:004387	KOW	IPR_Domain	EXONT:000011	28
EXONT:004388	Ribosomal protein L24/L26, conserved site	IPR_Site	EXONT:000011	6
EXONT:004389	Sugar transporter, conserved site	IPR_Site	EXONT:000004	73
EXONT:004391	Nucleotidyl transferase	IPR_Domain	EXONT:000002	16
EXONT:004395	Alpha-D-phosphohexomutase, C-terminal	IPR_Domain	EXONT:000002	8
EXONT:004396	Alpha-D-phosphohexomutase, alpha/beta/alpha domain I	IPR_Domain	EXONT:000002	22
EXONT:004397	Alpha-D-phosphohexomutase, alpha/beta/alpha domain II	IPR_Domain	EXONT:000002	15
EXONT:004398	Alpha-D-phosphohexomutase, alpha/beta/alpha domain III	IPR_Domain	EXONT:000002	14
EXONT:004400	Galactose-1-phosphate uridyl transferase, N-terminal	IPR_Domain	EXONT:000002	7
EXONT:004401	Galactose-1-phosphate uridyl transferase, C-terminal	IPR_Domain	EXONT:000002	5
EXONT:004406	Glucosamine/galactosamine-6-phosphate isomerase	IPR_Domain	EXONT:000011	16
EXONT:004407	6-phosphogluconolactonase, DevB-type	IPR_Domain	EXONT:000002,EXONT:000011	6
EXONT:004412	HAD-like domain	IPR_Domain	EXONT:000011	570
EXONT:004413	HAD-superfamily hydrolase,subfamily IIIA	IPR_Domain	EXONT:000011	7
EXONT:004418	Tyrosine aminotransferase	IPR_Domain	EXONT:000002,EXONT:000011,EXONT:000005	11
EXONT:004419	Tyrosine/nicotianamine aminotransferase	IPR_Domain	EXONT:000002,EXONT:000011,EXONT:000005	11
EXONT:004424	Syntaxin, N-terminal domain	IPR_Domain	EXONT:000011	44
EXONT:004426	Syntaxin/epimorphin, conserved site	IPR_Site	EXONT:000005	33
EXONT:004428	PTB/PI domain	IPR_Domain	EXONT:000011,EXONT:000005	177
EXONT:004429	Phosphotyrosine interaction domain, Shc-like	IPR_Domain	EXONT:000011,EXONT:000005	30
EXONT:004431	Neurotransmitter-gated ion-channel transmembrane domain	IPR_Domain	EXONT:000011	149
EXONT:004437	Glycosyl hydrolase, family 13, catalytic domain	IPR_Domain	EXONT:000002,EXONT:000011,EXONT:000005	33
EXONT:004438	Alpha-amylase, C-terminal all beta	IPR_Domain	EXONT:000002,EXONT:000011,EXONT:000005	7
EXONT:004439	Glycosyl hydrolase, family 13, all-beta	IPR_Domain	EXONT:000011	39
EXONT:004440	DNA photolyase, N-terminal	IPR_Domain	EXONT:000011	11
EXONT:004441	Tumour necrosis factor-like domain	IPR_Domain	EXONT:000005	109
EXONT:004442	Tumour necrosis factor domain	IPR_Domain	EXONT:000005	51
EXONT:004446	Exonuclease, RNase T/DNA polymerase III	IPR_Domain	EXONT:000005	60
EXONT:004447	Exonuclease	IPR_Domain	EXONT:000002,EXONT:000005	59
EXONT:004448	2Fe-2S ferredoxin, iron-sulphur binding site	IPR_Site	EXONT:000005	5
EXONT:004453	Cation-transporting P-type ATPase, C-terminal	IPR_Domain	EXONT:000011	86
EXONT:004454	DHBP synthase RibB-like alpha/beta domain	IPR_Domain	EXONT:000011	5
EXONT:004455	YrdC-like domain	IPR_Domain	EXONT:000011,EXONT:000005	5
EXONT:004456	GTP binding domain	IPR_Domain	EXONT:000005	61
EXONT:004457	GTP1/OBG, conserved site	IPR_Site	EXONT:000005	3
EXONT:004458	Aspartyl/Glutamyl-tRNA(Gln) amidotransferase, subunit B/E, catalytic	IPR_Domain	EXONT:000002	8
EXONT:004459	FAD dependent oxidoreductase	IPR_Domain	EXONT:000002	77
EXONT:004460	Beta defensin/Neutrophil defensin	IPR_Domain	EXONT:000011	6
EXONT:004461	Mammalian defensins	IPR_Domain	EXONT:000011	4
EXONT:004462	Phosphoribulokinase/uridine kinase	IPR_Domain	EXONT:000002,EXONT:000005	21
EXONT:004463	XPG N-terminal	IPR_Domain	EXONT:000002	11
EXONT:004464	XPG-I domain	IPR_Domain	EXONT:000002	7
EXONT:004466	Acyl-CoA dehydrogenase, conserved site	IPR_Site	EXONT:000002	24
EXONT:004467	Acyl-CoA oxidase/dehydrogenase, central domain	IPR_Domain	EXONT:000002	59
EXONT:004469	FAD linked oxidase, N-terminal	IPR_Domain	EXONT:000002,EXONT:000005	16
EXONT:004471	Glutamate/phenylalanine/leucine/valine dehydrogenase, C-terminal	IPR_Domain	EXONT:000002,EXONT:000011	9
EXONT:004472	Glutamate/phenylalanine/leucine/valine dehydrogenase, dimerisation domain	IPR_Domain	EXONT:000002	6
EXONT:004473	Methylmalonyl-CoA mutase, alpha/beta chain, catalytic	IPR_Domain	EXONT:000002,EXONT:000005	9
EXONT:004474	Methylmalonyl-CoA mutase, alpha chain, catalytic	IPR_Domain	EXONT:000002,EXONT:000005	9
EXONT:004476	Glycoside hydrolase, family 2, immunoglobulin-like beta-sandwich	IPR_Domain	EXONT:000002	10
EXONT:004477	Glycoside hydrolase, family 2, TIM barrel	IPR_Domain	EXONT:000002,EXONT:000011	11
EXONT:004478	Glycosyl hydrolases family 2, sugar binding domain	IPR_Domain	EXONT:000002,EXONT:000011	8
EXONT:004480	3-hydroxyacyl-CoA dehydrogenase, C-terminal	IPR_Domain	EXONT:000002,EXONT:000011,EXONT:000005	13
EXONT:004482	Glycerol-3-phosphate dehydrogenase, NAD-dependent, C-terminal	IPR_Domain	EXONT:000002,EXONT:000011,EXONT:000005	8
EXONT:004484	6-phosphogluconate dehydrogenase, C-terminal	IPR_Domain	EXONT:000002,EXONT:000011,EXONT:000005	11
EXONT:004486	6-phosphogluconate dehydrogenase, NADP-binding	IPR_Domain	EXONT:000002,EXONT:000011	17
EXONT:004487	2-5-oligoadenylate synthetase, N-terminal	IPR_Domain	EXONT:000002,EXONT:000005	19
EXONT:004488	2-5-oligoadenylate synthetase, conserved site	IPR_Site	EXONT:000002,EXONT:000005	19
EXONT:004493	Heavy metal-associated domain, HMA	IPR_Domain	EXONT:000005	21
EXONT:004494	Heavy metal-associated domain, copper ion-binding	IPR_Domain	EXONT:000005	12
EXONT:004500	Aspartate/ornithine carbamoyltransferase, Asp/Orn-binding domain	IPR_Domain	EXONT:000002,EXONT:000005	10
EXONT:004501	Aspartate/ornithine carbamoyltransferase, carbamoyl-P binding	IPR_Domain	EXONT:000002	9
EXONT:004502	DNA-directed DNA polymerase, family B, exonuclease domain	IPR_Domain	EXONT:000002,EXONT:000005	42
EXONT:004503	DNA-directed DNA polymerase, family B, multifunctional domain	IPR_Domain	EXONT:000002,EXONT:000005	44
EXONT:004504	NADH:ubiquinone oxidoreductase-like, 20kDa subunit	IPR_Domain	EXONT:000005	5
EXONT:004505	D-isomer specific 2-hydroxyacid dehydrogenase, catalytic domain	IPR_Domain	EXONT:000002,EXONT:000005	32
EXONT:004506	D-isomer specific 2-hydroxyacid dehydrogenase, NAD-binding	IPR_Domain	EXONT:000011,EXONT:000005	23
EXONT:004507	Intein splice site	IPR_Site	EXONT:000011,EXONT:000008	2
EXONT:004510	Pseudouridine synthase, RsuA/RluB/C/D/E/F	IPR_Domain	EXONT:000002,EXONT:000005	18
EXONT:004512	Pseudouridine synthase, catalytic domain	IPR_Domain	EXONT:000002,EXONT:000005	83
EXONT:004513	5'-Nucleotidase, conserved site	IPR_Site	EXONT:000002,EXONT:000005	2
EXONT:004515	Cysteine-rich repeat	IPR_Repeat	EXONT:000011,EXONT:000007	7
EXONT:004520	Cobalamin (vitamin B12)-binding domain	IPR_Domain	EXONT:000005	9
EXONT:004521	Methylmalonyl-CoA mutase, C-terminal	IPR_Domain	EXONT:000002,EXONT:000005	3
EXONT:004522	Phosphopantetheine attachment site	IPR_Site	EXONT:000011,EXONT:000008	3
EXONT:004523	Ku70/Ku80 beta-barrel domain	IPR_Domain	EXONT:000005	11
EXONT:004524	Restriction endonuclease type II-like	IPR_Domain	EXONT:000011	16
EXONT:004525	ERCC4 domain	IPR_Domain	EXONT:000002,EXONT:000011,EXONT:000005	23
EXONT:004526	GTP1/OBG domain	IPR_Domain	EXONT:000005	8
EXONT:004527	Toprim domain	IPR_Domain	EXONT:000011	12
EXONT:004530	3-hydroxyacyl-CoA dehydrogenase, NAD binding	IPR_Domain	EXONT:000002,EXONT:000011	20
EXONT:004531	3-hydroxyacyl-CoA dehydrogenase, conserved site	IPR_Site	EXONT:000002	7
EXONT:004534	D-amino acid oxidase, conserved site	IPR_Site	EXONT:000002	2
EXONT:004536	6-phosphogluconate-binding site	IPR_Site	EXONT:000002,EXONT:000005	1
EXONT:004537	Serine/threonine-specific protein phosphatase/bis(5-nucleosyl)-tetraphosphatase	IPR_Domain	EXONT:000002	104
EXONT:004539	SAF domain	IPR_Domain	EXONT:000011	1
EXONT:004540	Antifreeze-like/N-acetylneuraminic acid synthase C-terminal	IPR_Domain	EXONT:000011	2
EXONT:004541	RNA-binding domain, S1, IF1 type	IPR_Domain	EXONT:000011,EXONT:000005	11
EXONT:004543	Neurotransmitter-gated ion-channel ligand-binding	IPR_Domain	EXONT:000004	251
EXONT:004544	GHMP kinase, ATP-binding, conserved site	IPR_Site	EXONT:000005	3
EXONT:004545	GHMP kinase N-terminal domain	IPR_Domain	EXONT:000005	12
EXONT:004546	Cystine knot, C-terminal	IPR_Domain	EXONT:000011	34
EXONT:004547	Cystine knot	IPR_Domain	EXONT:000011	23
EXONT:004548	Insulin-like growth factor binding protein, N-terminal	IPR_Domain	EXONT:000011	925
EXONT:004549	Furin-like cysteine-rich domain	IPR_Domain	EXONT:000002,EXONT:000003,EXONT:000011,EXONT:000005	35
EXONT:004550	Furin-like repeat	IPR_Repeat	EXONT:000011,EXONT:000007	109
EXONT:004551	Bax inhibitor 1, conserved site	IPR_Site	EXONT:000011	3
EXONT:004554	Glutamine amidotransferase	IPR_Domain	EXONT:000011	38
EXONT:004557	Glycine cleavage T-protein, N-terminal	IPR_Domain	EXONT:000002	28
EXONT:004558	Pseudouridine synthase, RluC/RluD, conserved site	IPR_Site	EXONT:000002,EXONT:000005	2
EXONT:004559	Polycystin cation channel	IPR_Domain	EXONT:000011	21
EXONT:004564	Twin-arginine translocation pathway, signal sequence	IPR_Site	EXONT:000011	5
EXONT:004566	Ubiquinol-cytochrome c reductase, iron-sulphur subunit	IPR_Domain	EXONT:000004,EXONT:000002	1
EXONT:004588	Myb domain	IPR_Domain	EXONT:000005	39
EXONT:004612	YD repeat	IPR_Repeat	EXONT:000011,EXONT:000007	14
EXONT:004614	EYA domain	IPR_Domain	EXONT:000011	38
EXONT:004615	Polynucleotide 3'-phosphatase	IPR_Domain	EXONT:000011	8
EXONT:004616	VWC out	IPR_Domain	EXONT:000011	8
EXONT:004617	Leucine-rich repeat, cysteine-containing subtype	IPR_Repeat	EXONT:000011,EXONT:000007	24
EXONT:004618	Helicase-like, DEXD box c2 type	IPR_Domain	EXONT:000002,EXONT:000005	36
EXONT:004619	DEAD2	IPR_Domain	EXONT:000002,EXONT:000005	21
EXONT:004620	ATP-dependent helicase, C-terminal	IPR_Domain	EXONT:000002,EXONT:000005	29
EXONT:004621	LamG-like jellyroll fold	IPR_Domain	EXONT:000011	7
EXONT:004622	AWS	IPR_Domain	EXONT:000002	7
EXONT:004623	DZF	IPR_Domain	EXONT:000011	38
EXONT:004625	Zinc finger, PMZ-type	IPR_Domain	EXONT:000005	1
EXONT:004626	Zinc finger, SWIM-type	IPR_Domain	EXONT:000005	14
EXONT:004627	Bromodomain transcription factor	IPR_Domain	EXONT:000011	6
EXONT:004629	PUG domain	IPR_Domain	EXONT:000005	13
EXONT:004630	PSP, proline-rich	IPR_Domain	EXONT:000011	4
EXONT:004631	CID domain	IPR_Domain	EXONT:000011	30
EXONT:004633	TLDc	IPR_Domain	EXONT:000011	19
EXONT:004634	Zinc finger, DBF-type	IPR_Domain	EXONT:000005	6
EXONT:004635	NEUZ	IPR_Domain	EXONT:000011	32
EXONT:004636	SPRY-associated	IPR_Domain	EXONT:000011	83
EXONT:004637	RWD domain	IPR_Domain	EXONT:000011,EXONT:000005	42
EXONT:004638	BRK domain	IPR_Domain	EXONT:000002,EXONT:000005	15
EXONT:004639	UAS	IPR_Domain	EXONT:000011	13
EXONT:004642	Zinc finger, TTF-type	IPR_Domain	EXONT:000011	4
EXONT:004643	VPS10	IPR_Domain	EXONT:000011	57
EXONT:004648	ADAM, cysteine-rich	IPR_Domain	EXONT:000002	54
EXONT:004649	Peptide N glycanase, PAW domain	IPR_Domain	EXONT:000011	4
EXONT:004650	Glycosyl hydrolase, family 13, subfamily, catalytic domain	IPR_Domain	EXONT:000002,EXONT:000011,EXONT:000005	27
EXONT:004651	RNA polymerase II, Rpb4, core	IPR_Domain	EXONT:000011	10
EXONT:004652	RNA polymerase, N-terminal	IPR_Domain	EXONT:000002,EXONT:000005	21
EXONT:004653	Cytochrome b561/ferric reductase transmembrane	IPR_Domain	EXONT:000011	29
EXONT:004654	LisH dimerisation motif	IPR_Domain	EXONT:000005	59
EXONT:004655	CTLH, C-terminal LisH motif	IPR_Domain	EXONT:000011	25
EXONT:004656	Sel1-like	IPR_Repeat	EXONT:000011,EXONT:000007	71
EXONT:004657	CARP motif	IPR_Domain	EXONT:000011	9
EXONT:004658	HTH CenpB-type DNA-binding domain	IPR_Domain	EXONT:000005	9
EXONT:004659	Uncharacterised domain DM10	IPR_Domain	EXONT:000011	18
EXONT:004660	Cystinosin/ERS1p repeat	IPR_Repeat	EXONT:000011,EXONT:000007	17
EXONT:004663	Green fluorescent protein	IPR_Domain	EXONT:000011	14
EXONT:004664	G2 nidogen/fibulin G2F	IPR_Domain	EXONT:000011	17
EXONT:004665	Protein of unknown function DM15	IPR_Repeat	EXONT:000011,EXONT:000007	8
EXONT:004666	Domain of unknown function DM14	IPR_Domain	EXONT:000011	16
EXONT:004668	Zinc finger, C2CH-type	IPR_Domain	EXONT:000005	26
EXONT:004669	Peroxin/Ferlin domain	IPR_Domain	EXONT:000011	23
EXONT:004670	Peptidase C19, ubiquitin-specific peptidase, DUSP domain	IPR_Domain	EXONT:000002	41
EXONT:004672	Peptidoglycan recognition protein family domain, metazoa/bacteria	IPR_Domain	EXONT:000002,EXONT:000005	17
EXONT:004673	Prolyl 4-hydroxylase, alpha subunit	IPR_Domain	EXONT:000002,EXONT:000005	84
EXONT:004677	Iron sulphur-containing domain, CDGSH-type, subfamily	IPR_Domain	EXONT:000005	6
EXONT:004678	Iron sulphur-containing domain, CDGSH-type	IPR_Domain	EXONT:000005	6
EXONT:004679	Testicular haploid expressed repeat	IPR_Repeat	EXONT:000011,EXONT:000007	6
EXONT:004680	Beta-propeller repeat TECPR	IPR_Repeat	EXONT:000011,EXONT:000007	36
EXONT:004681	Parallel beta-helix repeat	IPR_Repeat	EXONT:000011,EXONT:000007	47
EXONT:004682	TDU repeat	IPR_Repeat	EXONT:000011,EXONT:000007	4
EXONT:004683	LPS-induced tumor necrosis factor alpha factor	IPR_Domain	EXONT:000011	5
EXONT:004684	RNA-binding protein Lupus La	IPR_Domain	EXONT:000011	20
EXONT:004685	Carbohydrate-binding/sugar hydrolysis domain	IPR_Domain	EXONT:000011	23
EXONT:004686	TRAM/LAG1/CLN8 homology domain	IPR_Domain	EXONT:000011	81
EXONT:004688	Heat shock chaperonin-binding	IPR_Domain	EXONT:000011	23
EXONT:004690	Elongator protein 3/MiaB/NifB	IPR_Domain	EXONT:000002,EXONT:000005	43
EXONT:004691	Radical SAM	IPR_Domain	EXONT:000002,EXONT:000005	40
EXONT:004692	Domain of unknown function SprT-like	IPR_Domain	EXONT:000011	8
EXONT:004693	YqgF/RNase H-like domain	IPR_Domain	EXONT:000002	10
EXONT:004694	Zinc finger, Rad18-type putative	IPR_Domain	EXONT:000005	6
EXONT:004695	ZASP	IPR_Domain	EXONT:000011	5
EXONT:004696	Dystroglycan-type cadherin-like	IPR_Domain	EXONT:000005	11
EXONT:004697	Transcription antitermination protein NusG, N-terminal domain	IPR_Domain	EXONT:000011	3
EXONT:004698	Ribonucleoprotein LSM domain, eukaryotic/archaea-type	IPR_Domain	EXONT:000011	47
EXONT:004699	Adenosine/AMP deaminase active site	IPR_Site	EXONT:000002	4
EXONT:004700	Kelch repeat type 1	IPR_Repeat	EXONT:000005,EXONT:000007	225
EXONT:004704	Molybdopterin oxidoreductase	IPR_Domain	EXONT:000002	7
EXONT:004708	SLC41 divalent cation transporters, integral membrane domain	IPR_Domain	EXONT:000004	32
EXONT:004710	Cyclin, N-terminal	IPR_Domain	EXONT:000011	111
EXONT:004711	HD domain	IPR_Domain	EXONT:000011	15
EXONT:004713	TRNA endonuclease-like domain	IPR_Domain	EXONT:000002,EXONT:000005	6
EXONT:004714	TRNA intron endonuclease, catalytic domain-like	IPR_Domain	EXONT:000002,EXONT:000005	12
EXONT:004719	TRNA intron endonuclease, N-terminal	IPR_Domain	EXONT:000002	4
EXONT:004720	Amidohydrolase 1	IPR_Domain	EXONT:000002	65
EXONT:004724	Coatomer, WD associated region	IPR_Domain	EXONT:000011	22
EXONT:004725	Partial AB-hydrolase lipase domain	IPR_Domain	EXONT:000011	19
EXONT:004726	Fatty acid hydroxylase	IPR_Domain	EXONT:000002,EXONT:000005	15
EXONT:004728	AIG1	IPR_Domain	EXONT:000005	12
EXONT:004730	Hox9, N-terminal activation domain	IPR_Domain	EXONT:000011	4
EXONT:004732	PEA3-type ETS-domain transcription factor, N-terminal	IPR_Domain	EXONT:000005	32
EXONT:004737	Islet cell autoantigen Ica1, C-terminal	IPR_Domain	EXONT:000011	16
EXONT:004738	Motilin/ghrelin-associated peptide	IPR_Domain	EXONT:000005	7
EXONT:004739	Motilin/ghrelin	IPR_Domain	EXONT:000005	5
EXONT:004744	TAFII55 protein, conserved region	IPR_Domain	EXONT:000011	7
EXONT:004746	Opioid growth factor receptor (OGFr) conserved domain	IPR_Domain	EXONT:000003	10
EXONT:004748	Cwf19-like protein, C-terminal domain-2	IPR_Domain	EXONT:000011	6
EXONT:004749	Cwf19-like, C-terminal domain-1	IPR_Domain	EXONT:000011	8
EXONT:004750	Coiled-coil domain containing protein 109, C-terminal	IPR_Domain	EXONT:000011	11
EXONT:004751	Opioid growth factor receptor repeat	IPR_Repeat	EXONT:000011,EXONT:000007	1
EXONT:004753	Glucosylceramidase	IPR_Domain	EXONT:000002	9
EXONT:004754	Platelet-derived growth factor, N-terminal	IPR_Domain	EXONT:000005	8
EXONT:004756	Pinin/SDK/MemA protein	IPR_Domain	EXONT:000011	4
EXONT:004757	Pinin/SDK	IPR_Domain	EXONT:000011	6
EXONT:004758	Rab effector MyRIP/Melanophilin	IPR_Domain	EXONT:000011	17
EXONT:004760	Transcriptional activator, Zfx / Zfy domain	IPR_Domain	EXONT:000005	18
EXONT:004763	Dickkopf, N-terminal cysteine-rich	IPR_Domain	EXONT:000011	8
EXONT:004764	PRELI/MSF1	IPR_Domain	EXONT:000011	34
EXONT:004765	Anti-Mullerian hormone, N-terminal	IPR_Domain	EXONT:000005	5
EXONT:004767	Engulfment/cell motility, ELMO	IPR_Domain	EXONT:000011	38
EXONT:004769	Caudal-like activation domain	IPR_Domain	EXONT:000011	4
EXONT:004770	Intermediate filament head, DNA-binding domain	IPR_Domain	EXONT:000011	6
EXONT:004773	5-AMP-activated protein kinase, beta subunit, interaction domain	IPR_Domain	EXONT:000005	6
EXONT:004777	Pex, N-terminal	IPR_Domain	EXONT:000011	8
EXONT:004780	Domain of unknown function DUF619	IPR_Domain	EXONT:000011	4
EXONT:004782	Hyaluronan/mRNA-binding protein	IPR_Domain	EXONT:000011	10
EXONT:004783	Acyl-CoA thioester hydrolase/bile acid-CoA amino acid N-acetyltransferase	IPR_Domain	EXONT:000011	3
EXONT:004790	LMBR1-like membrane protein	IPR_Domain	EXONT:000011	52
EXONT:004791	INO80 complex subunit B-like conserved region	IPR_Domain	EXONT:000011	2
EXONT:004792	Fzo/mitofusin HR2 domain	IPR_Domain	EXONT:000002	8
EXONT:004793	Domain of unknown function DUF625	IPR_Domain	EXONT:000011	7
EXONT:004797	Zinc finger, Sec23/Sec24-type	IPR_Domain	EXONT:000005	21
EXONT:004798	Sec23/Sec24, trunk domain	IPR_Domain	EXONT:000011	38
EXONT:004799	Hepatocyte nuclear factor 1, beta isoform, C-terminal	IPR_Domain	EXONT:000011	12
EXONT:004800	Hepatocyte nuclear factor 1, alpha isoform C-terminal	IPR_Domain	EXONT:000011	2
EXONT:004801	Hepatocyte nuclear factor 1, N-terminal	IPR_Domain	EXONT:000011	9
EXONT:004802	Sec23/Sec24, helical domain	IPR_Domain	EXONT:000011	19
EXONT:004803	RNA polymerase II-binding domain	IPR_Domain	EXONT:000011	13
EXONT:004804	Timeless protein	IPR_Domain	EXONT:000011	8
EXONT:004805	Domain of unknown function DUF622	IPR_Domain	EXONT:000011	2
EXONT:004806	Rad21/Rec8-like protein, C-terminal	IPR_Domain	EXONT:000011	4
EXONT:004807	Rad21/Rec8-like protein, C-terminal, eukaryotic	IPR_Domain	EXONT:000011	3
EXONT:004808	Rad21/Rec8-like protein, N-terminal	IPR_Domain	EXONT:000005	8
EXONT:004809	Armadillo repeat-containing domain	IPR_Domain	EXONT:000011	19
EXONT:004810	Glutathione-dependent formaldehyde-activating enzyme/centromere protein V	IPR_Domain	EXONT:000002,EXONT:000011	4
EXONT:004814	Interferon-related developmental regulator, C-terminal	IPR_Domain	EXONT:000011	2
EXONT:004816	Vps16, C-terminal	IPR_Domain	EXONT:000011	10
EXONT:004817	Vps16, N-terminal	IPR_Domain	EXONT:000011	14
EXONT:004819	HAP1, N-terminal	IPR_Domain	EXONT:000011	17
EXONT:004820	Helicase, superfamily 1/2, ATP-binding domain	IPR_Domain	EXONT:000011	590
EXONT:004821	Helicase/UvrB domain	IPR_Domain	EXONT:000002,EXONT:000011,EXONT:000005	9
EXONT:004828	Vesicle tethering protein Uso1/P115-like , head domain	IPR_Domain	EXONT:000011	8
EXONT:004829	Uso1/p115-like vesicle tethering protein, C-terminal	IPR_Domain	EXONT:000004	3
EXONT:004831	NUDE protein, C-terminal	IPR_Domain	EXONT:000011	12
EXONT:004832	PT repeat	IPR_Repeat	EXONT:000011,EXONT:000007	1
EXONT:004834	Yip1 domain	IPR_Domain	EXONT:000011	27
EXONT:004838	Nab1, C-terminal	IPR_Domain	EXONT:000011	5
EXONT:004839	Nab, N-terminal	IPR_Domain	EXONT:000011	3
EXONT:004840	NAB co-repressor, domain	IPR_Domain	EXONT:000011	6
EXONT:004845	SHQ1 protein	IPR_Domain	EXONT:000011	6
EXONT:004846	Poly(A) polymerase, RNA-binding domain	IPR_Domain	EXONT:000002,EXONT:000005	11
EXONT:004847	Nucleotidyltransferase, class I, C-terminal-like	IPR_Domain	EXONT:000002,EXONT:000005	11
EXONT:004850	Poly(A) polymerase, central domain	IPR_Domain	EXONT:000002	23
EXONT:004857	YHS domain	IPR_Domain	EXONT:000011	1
EXONT:004858	Ribosome biogenesis protein BMS1/TSR1, C-terminal	IPR_Domain	EXONT:000011	15
EXONT:004860	Arsenite-resistance protein 2	IPR_Domain	EXONT:000011	6
EXONT:004861	Cyclodeaminase/cyclohydrolase	IPR_Domain	EXONT:000002	6
EXONT:004864	Cysteine/histidine-rich domain	IPR_Domain	EXONT:000011	14
EXONT:004865	CS domain	IPR_Domain	EXONT:000011	63
EXONT:004866	LRAT-like domain	IPR_Domain	EXONT:000011	13
EXONT:004868	RNA polymerase Rpb1, domain 3	IPR_Domain	EXONT:000002,EXONT:000005	14
EXONT:004869	RNA polymerase Rpb1, domain 7	IPR_Domain	EXONT:000002,EXONT:000005	3
EXONT:004870	RNA polymerase Rpb1, domain 6	IPR_Domain	EXONT:000002,EXONT:000005	4
EXONT:004873	RNA polymerase Rpb1, domain 1	IPR_Domain	EXONT:000002,EXONT:000005	24
EXONT:004874	RNA polymerase Rpb1, domain 5	IPR_Domain	EXONT:000002,EXONT:000005	37
EXONT:004875	RNA polymerase Rpb1, domain 4	IPR_Domain	EXONT:000002,EXONT:000005	9
EXONT:004876	BRICHOS domain	IPR_Domain	EXONT:000011	28
EXONT:004877	DNA/pantothenate metabolism flavoprotein, C-terminal	IPR_Domain	EXONT:000011	3
EXONT:004878	Zinc finger, C2H2-like	IPR_Domain	EXONT:000011	1416
EXONT:004879	Zinc finger, C2H2	IPR_Domain	EXONT:000011,EXONT:000005	1321
EXONT:004885	Brix domain	IPR_Domain	EXONT:000011	27
EXONT:004886	Immunoglobulin-like domain	IPR_Domain	EXONT:000011,EXONT:000005	1739
EXONT:004887	NACHT nucleoside triphosphatase	IPR_Domain	EXONT:000011	29
EXONT:004891	DNA-directed RNA polymerase, subunit 2, domain 6	IPR_Domain	EXONT:000002,EXONT:000005	23
EXONT:004892	RNA polymerase, beta subunit, conserved site	IPR_Site	EXONT:000002,EXONT:000005	4
EXONT:004893	Gelsolin domain	IPR_Domain	EXONT:000011	114
EXONT:004898	Identical protein binding	GO_molecular_function	EXONT:000005	2268
EXONT:004902	Autophagy-related protein 3, N-terminal	IPR_Domain	EXONT:000011	7
EXONT:004903	Autophagy-related protein 3	IPR_Domain	EXONT:000011	3
EXONT:004906	Antibiotic biosynthesis monooxygenase	IPR_Domain	EXONT:000011	9
EXONT:004911	Small-subunit processome, Utp12	IPR_Domain	EXONT:000011	13
EXONT:004921	Domain of unknown function DUF367	IPR_Domain	EXONT:000011	3
EXONT:004923	Domain of unknown function DUF382	IPR_Domain	EXONT:000011	3
EXONT:004926	DNA polymerase alpha/epsilon, subunit B	IPR_Domain	EXONT:000002,EXONT:000005	19
EXONT:004927	Nucleoporin, Nup133/Nup155-like, C-terminal	IPR_Domain	EXONT:000011	26
EXONT:004928	Sec8 exocyst complex component specific domain	IPR_Domain	EXONT:000011	2
EXONT:004929	Cdc23	IPR_Domain	EXONT:000011	5
EXONT:004930	Up-frameshift suppressor 2	IPR_Domain	EXONT:000011	5
EXONT:004932	CCR4-Not complex component, Not1, C-terminal	IPR_Domain	EXONT:000011	10
EXONT:004933	Ssl1-like	IPR_Domain	EXONT:000011	8
EXONT:004934	Replication factor-A protein 1, N-terminal	IPR_Domain	EXONT:000005	5
EXONT:004937	FAM203 N-terminal	IPR_Domain	EXONT:000011	4
EXONT:004938	FAM203 C-terminal	IPR_Domain	EXONT:000011	3
EXONT:004939	CCR4-Not complex component, Not N-terminal domain	IPR_Domain	EXONT:000011	7
EXONT:004940	RNase L inhibitor RLI, possible metal-binding domain	IPR_Domain	EXONT:000011	3
EXONT:004948	Signal recognition particle receptor, alpha subunit, N-terminal	IPR_Domain	EXONT:000002,EXONT:000005	7
EXONT:004949	Peroxin 13, N-terminal	IPR_Domain	EXONT:000011	1
EXONT:004952	Peptidase S59, nucleoporin	IPR_Domain	EXONT:000011	5
EXONT:004953	Vps53-like, N-terminal	IPR_Domain	EXONT:000011	14
EXONT:004954	Glycosyl transferase, family 28, C-terminal	IPR_Domain	EXONT:000002,EXONT:000005	5
EXONT:004955	Dopey, N-terminal	IPR_Domain	EXONT:000011	7
EXONT:004959	YTH domain	IPR_Domain	EXONT:000011	10
EXONT:004962	Mre11, DNA-binding	IPR_Domain	EXONT:000002,EXONT:000005	5
EXONT:004963	NOT2/NOT3/NOT5	IPR_Domain	EXONT:000011	9
EXONT:004966	Sof1-like protein	IPR_Domain	EXONT:000011	3
EXONT:004971	Protein of unknown function DUF408	IPR_Domain	EXONT:000011	4
EXONT:004980	Small-subunit processome, Utp21	IPR_Domain	EXONT:000011	5
EXONT:004981	Programmed cell death protein 2, C-terminal	IPR_Domain	EXONT:000011	8
EXONT:004987	MIT	IPR_Domain	EXONT:000011	33
EXONT:004995	Transferrin receptor-like, dimerisation domain	IPR_Domain	EXONT:000011	22
EXONT:004999	Thiamin pyrophosphokinase, catalytic domain	IPR_Domain	EXONT:000002,EXONT:000005	6
EXONT:005002	Thiamin pyrophosphokinase, vitamin B1-binding domain	IPR_Domain	EXONT:000005	4
EXONT:005003	ASCH domain	IPR_Domain	EXONT:000011	8
EXONT:005004	Tim44-like domain	IPR_Domain	EXONT:000011	10
EXONT:005007	F-box associated (FBA) domain	IPR_Domain	EXONT:000011	33
EXONT:005016	Ysc84 actin-binding domain	IPR_Domain	EXONT:000011	4
EXONT:005020	Arginine-tRNA-protein transferase, N-terminal	IPR_Domain	EXONT:000002	5
EXONT:005021	Arginine-tRNA-protein transferase, C-terminal	IPR_Domain	EXONT:000002	6
EXONT:005022	ApaG domain	IPR_Domain	EXONT:000011	3
EXONT:005023	SAB domain	IPR_Domain	EXONT:000005	12
EXONT:005025	Peptidase M28	IPR_Domain	EXONT:000011	62
EXONT:005030	Helicase-associated domain	IPR_Domain	EXONT:000002	51
EXONT:005034	Zinc hook, Rad50	IPR_Domain	EXONT:000011	2
EXONT:005035	Rad50 zinc hook	IPR_Domain	EXONT:000002,EXONT:000011,EXONT:000005	1
EXONT:005042	SWIRM domain	IPR_Domain	EXONT:000005	19
EXONT:005043	Zinc finger, HIT-type	IPR_Domain	EXONT:000011	11
EXONT:005066	Glycosyltransferase, DXD sugar-binding motif	IPR_Site	EXONT:000011	3
EXONT:005069	TFIID subunit, WD40-associated region	IPR_Domain	EXONT:000011	4
EXONT:005075	CP2 transcription factor	IPR_Domain	EXONT:000011	39
EXONT:005085	Tis11B-like protein, N-terminal	IPR_Domain	EXONT:000011	4
EXONT:005087	Glutaminyl-tRNA synthetase, class Ib, non-specific RNA-binding domain 2	IPR_Domain	EXONT:000002,EXONT:000005	6
EXONT:005089	Glutaminyl-tRNA synthetase, class Ib, non-specific RNA-binding domain, N-terminal	IPR_Domain	EXONT:000002,EXONT:000005	5
EXONT:005090	RNA polymerase Rpb2, domain 7	IPR_Domain	EXONT:000002,EXONT:000005	5
EXONT:005091	RNA polymerase Rpb2, domain 2	IPR_Domain	EXONT:000002,EXONT:000005	13
EXONT:005093	RNA polymerase, beta subunit, protrusion	IPR_Domain	EXONT:000002,EXONT:000005	29
EXONT:005094	RNA polymerase Rpb2, domain 3	IPR_Domain	EXONT:000002,EXONT:000005	6
EXONT:005095	RNA polymerase Rpb2, domain 4	IPR_Domain	EXONT:000002,EXONT:000005	5
EXONT:005096	RNA polymerase Rpb2, domain 5	IPR_Domain	EXONT:000002,EXONT:000005	5
EXONT:005098	Lipin, N-terminal	IPR_Domain	EXONT:000011	9
EXONT:005099	Alpha 1,4-glycosyltransferase domain	IPR_Domain	EXONT:000011	2
EXONT:005107	Hypoxia induced protein, domain	IPR_Domain	EXONT:000011	8
EXONT:005108	RFX1 transcription activation region	IPR_Domain	EXONT:000005	11
EXONT:005110	Selenoprotein P, N-terminal	IPR_Domain	EXONT:000005	1
EXONT:005111	Selenoprotein P, C-terminal	IPR_Domain	EXONT:000005	1
EXONT:005120	DNA helicase, DnaB-like, C-terminal	IPR_Domain	EXONT:000002,EXONT:000005	5
EXONT:005121	DNA mismatch repair protein MutS-like, N-terminal	IPR_Domain	EXONT:000005	8
EXONT:005122	DNA mismatch repair protein MutS, core	IPR_Domain	EXONT:000005	41
EXONT:005123	Alanine dehydrogenase/PNT, NAD(H)-binding domain	IPR_Domain	EXONT:000011	6
EXONT:005124	SGS	IPR_Domain	EXONT:000011	4
EXONT:005125	Interferon-related developmental regulator, N-terminal	IPR_Domain	EXONT:000011	8
EXONT:005126	Vesicle transport v-SNARE, N-terminal	IPR_Domain	EXONT:000011	7
EXONT:005127	Lariat debranching enzyme, C-terminal	IPR_Domain	EXONT:000002	3
EXONT:005129	NPL4, zinc-binding putative	IPR_Domain	EXONT:000011	5
EXONT:005130	Nuclear pore localisation protein NPL4	IPR_Domain	EXONT:000011	9
EXONT:005131	SRP40, C-terminal	IPR_Domain	EXONT:000011	2
EXONT:005132	MRNA decapping protein 2, Box A	IPR_Domain	EXONT:000002,EXONT:000005	3
EXONT:005133	Timeless C-terminal	IPR_Domain	EXONT:000011	12
EXONT:005136	Ribosomal protein/NADH dehydrogenase domain	IPR_Domain	EXONT:000011	6
EXONT:005137	Periplasmic copper-binding protein NosD, beta helix domain	IPR_Domain	EXONT:000011	10
EXONT:005138	Domain of unknown function DUF676, lipase-like	IPR_Domain	EXONT:000011	12
EXONT:005140	Nucleoporin, NSP1-like, C-terminal	IPR_Domain	EXONT:000011	5
EXONT:005142	Ribosome receptor lysine/proline rich	IPR_Domain	EXONT:000011	1
EXONT:005144	Helicase domain	IPR_Domain	EXONT:000011	6
EXONT:005146	Pep3/Vps18/deep orange	IPR_Domain	EXONT:000011	1
EXONT:005149	TM2	IPR_Domain	EXONT:000011	6
EXONT:005151	MOFRL domain	IPR_Domain	EXONT:000011	2
EXONT:005153	HEPN	IPR_Domain	EXONT:000011	1
EXONT:005156	RNA-recognition motif (RRM) Nup35-type domain	IPR_Domain	EXONT:000011	4
EXONT:005158	Methyltransferase small domain	IPR_Domain	EXONT:000002	9
EXONT:005159	Zinc finger, DNL-type	IPR_Domain	EXONT:000005	3
EXONT:005160	Pre-mRNA polyadenylation factor Fip1	IPR_Domain	EXONT:000011	2
EXONT:005161	Saposin-like type B, 1	IPR_Domain	EXONT:000011	8
EXONT:005162	Dpy-30 motif	IPR_Site	EXONT:000011	6
EXONT:005163	DNA mismatch repair protein MutS, connector domain	IPR_Domain	EXONT:000005	13
EXONT:005164	DNA mismatch repair protein MutS, clamp	IPR_Domain	EXONT:000005	14
EXONT:005166	Adenylate kinase, active site lid domain	IPR_Domain	EXONT:000002	11
EXONT:005169	Peptidase M16, C-terminal domain	IPR_Domain	EXONT:000011	63
EXONT:005171	Aminopeptidase P N-terminal domain	IPR_Domain	EXONT:000002,EXONT:000005	8
EXONT:005172	Glucose-methanol-choline oxidoreductase, C-terminal	IPR_Domain	EXONT:000002	2
EXONT:005175	Methyltransferase TRM13	IPR_Domain	EXONT:000002	6
EXONT:005176	Zinc finger, DPH-type	IPR_Domain	EXONT:000011	5
EXONT:005178	Alanine dehydrogenase/pyridine nucleotide transhydrogenase, N-terminal	IPR_Domain	EXONT:000011	3
EXONT:005180	DNA binding HTH domain, Psq-type	IPR_Domain	EXONT:000005	9
EXONT:005190	Transcription initiation factor TFIID component TAF4	IPR_Domain	EXONT:000011	12
EXONT:005191	MoeZ/MoeB	IPR_Domain	EXONT:000011	1
EXONT:005192	APOBEC-like, C-terminal	IPR_Domain	EXONT:000002,EXONT:000005	23
EXONT:005195	Aspartyl beta-hydroxylase/Triadin domain	IPR_Domain	EXONT:000011	23
EXONT:005196	SDA1 domain	IPR_Domain	EXONT:000011	8
EXONT:005202	GATA-type transcription activator, N-terminal	IPR_Domain	EXONT:000005	5
EXONT:005205	NmrA-like	IPR_Domain	EXONT:000011	9
EXONT:005207	Proteinase inhibitor I19, pacifastin	IPR_Repeat	EXONT:000002,EXONT:000007	2
EXONT:005208	Hydantoinaseoxoprolinase, N-terminal	IPR_Domain	EXONT:000011	5
EXONT:005212	Transcription factor AP-2 alpha, N-terminal	IPR_Domain	EXONT:000005	1
EXONT:005214	Saposin-like type B, 2	IPR_Domain	EXONT:000011	18
EXONT:005215	Saposin B	IPR_Domain	EXONT:000011	33
EXONT:005218	Guanylate kinase-like	IPR_Domain	EXONT:000005	100
EXONT:005219	Guanylate kinase/L-type calcium channel beta subunit	IPR_Domain	EXONT:000005	139
EXONT:005220	Glutamine synthetase/guanido kinase, catalytic domain	IPR_Domain	EXONT:000002	31
EXONT:005221	Glutamine synthetase, catalytic domain	IPR_Domain	EXONT:000002	5
EXONT:005225	Glutamine synthetase, beta-Grasp	IPR_Domain	EXONT:000002	4
EXONT:005227	Clathrin adaptor, alpha/beta/gamma-adaptin, appendage, Ig-like subdomain	IPR_Domain	EXONT:000011	40
EXONT:005228	Coatomer/clathrin adaptor appendage, Ig-like subdomain	IPR_Domain	EXONT:000011	47
EXONT:005229	Clathrin adaptor, gamma-adaptin, appendage	IPR_Domain	EXONT:000011	28
EXONT:005230	Amyloidogenic glycoprotein, extracellular	IPR_Domain	EXONT:000011	14
EXONT:005231	Collagen triple helix repeat	IPR_Repeat	EXONT:000011,EXONT:000007	1386
EXONT:005235	Galanin	IPR_Domain	EXONT:000005	3
EXONT:005236	DNA-directed RNA polymerase Rpb11, 13-16kDa subunit, conserved site	IPR_Site	EXONT:000002,EXONT:000005	5
EXONT:005237	Whey acidic protein-type 4-disulphide core	IPR_Domain	EXONT:000002	42
EXONT:005238	Neuromedin U, C-terminal	IPR_Domain	EXONT:000011	3
EXONT:005240	Phosphoenolpyruvate carboxykinase, N-terminal	IPR_Domain	EXONT:000002,EXONT:000005	10
EXONT:005242	Laminin, N-terminal	IPR_Domain	EXONT:000011	76
EXONT:005244	Tachykinin	IPR_Domain	EXONT:000011	3
EXONT:005246	P-type ATPase, A domain	IPR_Domain	EXONT:000005	294
EXONT:005247	Chromo shadow domain	IPR_Domain	EXONT:000011	6
EXONT:005248	Marvel domain	IPR_Domain	EXONT:000011	106
EXONT:005249	Flavodoxin/nitric oxide synthase	IPR_Domain	EXONT:000002,EXONT:000005	35
EXONT:005251	Lytic transglycosylase-like SLT domain	IPR_Domain	EXONT:000011	3
EXONT:005252	FMN-dependent alpha-hydroxy acid dehydrogenase, active site	IPR_Site	EXONT:000002	2
EXONT:005256	Lipase, GDSL, active site	IPR_Site	EXONT:000002	4
EXONT:005257	Tyrosine-protein kinase, active site	IPR_Site	EXONT:000002	117
EXONT:005258	Peptidase S16, active site	IPR_Site	EXONT:000002	2
EXONT:005259	Peptidase S16, Lon C-terminal	IPR_Domain	EXONT:000002,EXONT:000011	8
EXONT:005262	Serine/threonine-protein kinase, active site	IPR_Site	EXONT:000002	446
EXONT:005264	Aldehyde oxidase/xanthine dehydrogenase, molybdopterin binding	IPR_Domain	EXONT:000002	33
EXONT:005267	Tubulin/FtsZ, C-terminal	IPR_Domain	EXONT:000002,EXONT:000005	41
EXONT:005268	Peptidase M17, leucyl aminopeptidase, N-terminal	IPR_Domain	EXONT:000002	5
EXONT:005269	Molybdenum cofactor biosynthesis, conserved site	IPR_Site	EXONT:000011	4
EXONT:005271	Ferritin/DPS protein domain	IPR_Domain	EXONT:000005	10
EXONT:005272	Methylguanine DNA methyltransferase, ribonuclease-like	IPR_Domain	EXONT:000002	2
EXONT:005273	Oxidoreductase, FAD-binding domain	IPR_Domain	EXONT:000002	18
EXONT:005274	5'-Nucleotidase, C-terminal	IPR_Domain	EXONT:000002	5
EXONT:005275	DNA topoisomerase I, DNA binding, eukaryotic-type	IPR_Domain	EXONT:000002,EXONT:000005	13
EXONT:005277	Synembryn	IPR_Domain	EXONT:000011	10
EXONT:005278	Band 4.1, C-terminal	IPR_Domain	EXONT:000005	17
EXONT:005279	Agenet-like domain	IPR_Domain	EXONT:000011	16
EXONT:005280	Chondroitin AC/alginate lyase	IPR_Domain	EXONT:000011	4
EXONT:005282	Anthrax toxin receptor, C-terminal	IPR_Domain	EXONT:000003	8
EXONT:005283	Anthrax toxin receptor, extracellular	IPR_Domain	EXONT:000003	13
EXONT:005285	Homeobox KN domain	IPR_Domain	EXONT:000005	33
EXONT:005286	Immunoglobulin C2-set	IPR_Domain	EXONT:000011	10
EXONT:005295	DNA methyltransferase 1-associated 1	IPR_Domain	EXONT:000011	4
EXONT:005301	Tandem-repeating region of mucin, epiglycanin-like	IPR_Domain	EXONT:000011	2
EXONT:005303	Domain of unknown function DUF814	IPR_Domain	EXONT:000011	10
EXONT:005312	PPPDE putative peptidase domain	IPR_Domain	EXONT:000011	11
EXONT:005314	Drought induced 19 protein-like, zinc-binding domain	IPR_Domain	EXONT:000011	12
EXONT:005318	Fibronectin-binding A, N-terminal	IPR_Domain	EXONT:000011	16
EXONT:005324	Head domain of trimeric autotransporter adhesin	IPR_Repeat	EXONT:000011,EXONT:000007	2
EXONT:005326	LISCH7	IPR_Domain	EXONT:000011	7
EXONT:005328	LSM-interacting domain	IPR_Domain	EXONT:000011	1
EXONT:005350	Peptidase M13, N-terminal domain	IPR_Domain	EXONT:000011	74
EXONT:005351	Peptidase M43, pregnancy-associated plasma-A	IPR_Domain	EXONT:000011	5
EXONT:005356	Pirin, C-terminal domain	IPR_Domain	EXONT:000011	6
EXONT:005357	RNA polymerase III Rpc82, C -terminal	IPR_Domain	EXONT:000002,EXONT:000005	8
EXONT:005365	Suppressor of forked	IPR_Domain	EXONT:000011	11
EXONT:005366	TEP1, N-terminal	IPR_Repeat	EXONT:000011,EXONT:000007	1
EXONT:005367	TROVE	IPR_Domain	EXONT:000005	16
EXONT:005368	Thrombospondin, C-terminal	IPR_Domain	EXONT:000011,EXONT:000005	28
EXONT:005373	Ubiquitin E2 variant, N-terminal	IPR_Domain	EXONT:000011	11
EXONT:005376	WGR domain	IPR_Domain	EXONT:000011	13
EXONT:005378	Zinc finger, piccolo-type	IPR_Domain	EXONT:000005	6
EXONT:005379	Six-hairpin glycosidase-like	IPR_Domain	EXONT:000002	101
EXONT:005382	Eukaryotic translation initiation factor 3 subunit C, N-terminal domain	IPR_Domain	EXONT:000005	15
EXONT:005383	HAT dimerisation domain, C-terminal	IPR_Domain	EXONT:000005	11
EXONT:005384	DALR anticodon binding	IPR_Domain	EXONT:000002,EXONT:000005	12
EXONT:005386	Zinc finger, CHY-type	IPR_Domain	EXONT:000005	3
EXONT:005387	Peptidase M50	IPR_Domain	EXONT:000002	8
EXONT:005388	Retrovirus capsid, C-terminal	IPR_Domain	EXONT:000011	55
EXONT:005389	Transcription factor, Skn-1-like, DNA-binding domain	IPR_Domain	EXONT:000005	15
EXONT:005390	Helix-hairpin-helix motif, class 2	IPR_Site	EXONT:000002,EXONT:000005	5
EXONT:005393	DNA polymerase III, clamp loader complex, gamma/delta/delta subunit, C-terminal	IPR_Domain	EXONT:000005	21
EXONT:005395	Aminoacyl-tRNA synthetase, class I, anticodon-binding	IPR_Domain	EXONT:000005	5
EXONT:005396	Ribonucleotide reductase R1 subunit, N-terminal	IPR_Domain	EXONT:000011	7
EXONT:005397	Ribosomal protein L7/L12, oligomerisation	IPR_Domain	EXONT:000011	3
EXONT:005400	Nuclear hormone receptor, ligand-binding	IPR_Domain	EXONT:000003,EXONT:000005	286
EXONT:005401	L-Aspartase-like	IPR_Domain	EXONT:000002	61
EXONT:005402	Tetraspanin, EC2 domain	IPR_Domain	EXONT:000011	116
EXONT:005406	Moesin tail domain	IPR_Domain	EXONT:000005	12
EXONT:005407	Steroid receptor coactivator	IPR_Domain	EXONT:000011	3
EXONT:005408	Nuclear receptor coactivator Src-1	IPR_Domain	EXONT:000002,EXONT:000011	3
EXONT:005411	Transglutaminase, C-terminal	IPR_Domain	EXONT:000002	36
EXONT:005412	Purple acid phosphatase-like, N-terminal	IPR_Domain	EXONT:000002,EXONT:000005	3
EXONT:005414	Invasin/intimin cell-adhesion	IPR_Domain	EXONT:000011	12
EXONT:005415	P53-like transcription factor, DNA-binding	IPR_Domain	EXONT:000005	227
EXONT:005416	Mu homology domain	IPR_Domain	EXONT:000011	79
EXONT:005417	Clathrin adaptor, mu subunit, C-terminal	IPR_Domain	EXONT:000011,EXONT:000005	64
EXONT:005418	Carboxypeptidase-like, regulatory domain	IPR_Domain	EXONT:000011	37
EXONT:005420	HSP40/DnaJ peptide-binding	IPR_Domain	EXONT:000005	43
EXONT:005421	PHM/PNGase F domain	IPR_Domain	EXONT:000002	28
EXONT:005423	Concanavalin A-like lectin/glucanases superfamily	IPR_Domain	EXONT:000011	1051
EXONT:005425	Myosin S1 fragment, N-terminal	IPR_Domain	EXONT:000002,EXONT:000005	5
EXONT:005426	Translation protein SH3-like domain	IPR_Domain	EXONT:000011	46
EXONT:005428	Actin cross-linking	IPR_Domain	EXONT:000011	21
EXONT:005431	Alanine racemase/group IV decarboxylase, C-terminal	IPR_Domain	EXONT:000002	15
EXONT:005432	Valyl/Leucyl/Isoleucyl-tRNA synthetase, editing domain	IPR_Domain	EXONT:000002	32
EXONT:005433	Mannose-6-phosphate receptor binding domain	IPR_Domain	EXONT:000011	77
EXONT:005434	GrpE nucleotide exchange factor, head	IPR_Domain	EXONT:000011	2
EXONT:005436	Transketolase, C-terminal/Pyruvate-ferredoxin oxidoreductase, domain II	IPR_Domain	EXONT:000002	17
EXONT:005438	Iron hydrogenase	IPR_Domain	EXONT:000011	20
EXONT:005439	Signal recognition particle, SRP9/SRP14 subunit	IPR_Domain	EXONT:000005	10
EXONT:005440	K homology domain, prokaryotic type	IPR_Domain	EXONT:000005	7
EXONT:005441	Elongation factor G, III-V domain	IPR_Domain	EXONT:000011	35
EXONT:005442	Hydroxymethylglutaryl-CoA reductase, class I/II, NAD/NADP-binding	IPR_Domain	EXONT:000005	4
EXONT:005443	DNA-directed RNA polymerase, RBP11-like dimerisation domain	IPR_Domain	EXONT:000005	26
EXONT:005444	Ribosomal protein L9/RNase H1, N-terminal	IPR_Domain	EXONT:000011	5
EXONT:005445	Hydroxymethylglutaryl-CoA reductase, class I/II, substrate-binding	IPR_Domain	EXONT:000002,EXONT:000005	8
EXONT:005449	Calreticulin/calnexin, P domain	IPR_Domain	EXONT:000005	15
EXONT:005451	Molybdenum cofactor biosynthesis, MoeB	IPR_Domain	EXONT:000011	153
EXONT:005452	GOLD	IPR_Domain	EXONT:000011	75
EXONT:005453	EAR	IPR_Repeat	EXONT:000011,EXONT:000007	28
EXONT:005454	Ferritin- like diiron domain	IPR_Domain	EXONT:000011	12
EXONT:005457	Alpha-macroglobulin, receptor-binding	IPR_Domain	EXONT:000011	43
EXONT:005458	Globin-like	IPR_Domain	EXONT:000011	27
EXONT:005459	Alpha-helical ferredoxin	IPR_Domain	EXONT:000005	13
EXONT:005460	Smac/DIABLO-like	IPR_Domain	EXONT:000011	5
EXONT:005462	TAFII-230 TBP-binding	IPR_Domain	EXONT:000011	2
EXONT:005463	Cysteine alpha-hairpin motif superfamily	IPR_Domain	EXONT:000011	9
EXONT:005464	High mobility group box domain	IPR_Domain	EXONT:000011	141
EXONT:005465	Co-chaperone HscB, C-terminal oligomerisation domain	IPR_Domain	EXONT:000011	3
EXONT:005466	Acyl-CoA dehydrogenase/oxidase C-terminal	IPR_Domain	EXONT:000002	97
EXONT:005467	Rapamycin-binding domain	IPR_Domain	EXONT:000005	2
EXONT:005468	Ferritin-like superfamily	IPR_Domain	EXONT:000011	32
EXONT:005469	Four-helical cytokine-like, core	IPR_Domain	EXONT:000011	162
EXONT:005470	Aminoacyl-tRNA synthetase, class 1a, anticodon-binding	IPR_Domain	EXONT:000002,EXONT:000005	60
EXONT:005471	Acyl carrier protein-like	IPR_Domain	EXONT:000011	16
EXONT:005472	Transcription factor IIA, helical	IPR_Domain	EXONT:000011	10
EXONT:005475	Rab geranylgeranyltransferase, alpha subunit, insert-domain	IPR_Domain	EXONT:000002,EXONT:000005	4
EXONT:005478	Transcription factor IIA, beta-barrel	IPR_Domain	EXONT:000011	7
EXONT:005479	DNA double-strand break repair and VJ recombination XRCC4, N-terminal	IPR_Domain	EXONT:000005	6
EXONT:005482	Regulator of chromosome condensation 1/beta-lactamase-inhibitor protein II	IPR_Domain	EXONT:000011	216
EXONT:005486	TRADD, N-terminal	IPR_Domain	EXONT:000003,EXONT:000005	3
EXONT:005488	RNA ligase/cyclic nucleotide phosphodiesterase	IPR_Domain	EXONT:000002	19
EXONT:005489	Acyl-CoA dehydrogenase/oxidase, N-terminal and middle domain	IPR_Domain	EXONT:000002	107
EXONT:005495	Ran-GTPase activating protein 1, C-terminal	IPR_Domain	EXONT:000002	10
EXONT:005496	Nuclear receptor coactivator, interlocking	IPR_Domain	EXONT:000005	8
EXONT:005499	Adenomatous polyposis coli protein, cysteine-rich repeat	IPR_Repeat	EXONT:000011,EXONT:000007	1
EXONT:005500	SAMP	IPR_Repeat	EXONT:000005,EXONT:000007	1
EXONT:005503	Adenomatous polyposis coli protein basic domain	IPR_Domain	EXONT:000005	1
EXONT:005505	Laminin I	IPR_Domain	EXONT:000005	30
EXONT:005507	Butirosin biosynthesis, BtrG-like	IPR_Domain	EXONT:000011	12
EXONT:005508	AIG2-like	IPR_Domain	EXONT:000011	1
EXONT:005512	Zinc finger, C2HC5-type	IPR_Domain	EXONT:000005	2
EXONT:005514	Formin Homology 1	IPR_Domain	EXONT:000011	2
EXONT:005518	Lipid transport, open beta-sheet	IPR_Domain	EXONT:000004	3
EXONT:005525	Ryanodine Receptor TM 4-6	IPR_Domain	EXONT:000004	18
EXONT:005528	Domain of unknown function DUF1086	IPR_Domain	EXONT:000011	17
EXONT:005529	Domain of unknown function DUF1087	IPR_Domain	EXONT:000011	6
EXONT:005530	PCAF, N-terminal	IPR_Domain	EXONT:000002	12
EXONT:005531	Spondin, N-terminal	IPR_Domain	EXONT:000011	4
EXONT:005538	Teneurin intracellular, N-terminal	IPR_Domain	EXONT:000011	20
EXONT:005540	Repulsive guidance molecule, C-terminal	IPR_Domain	EXONT:000011	3
EXONT:005542	Neural chondroitin sulphate proteoglycan cytoplasmic	IPR_Domain	EXONT:000011	3
EXONT:005544	Phosphatidylinositol-4, 5-bisphosphate phosphodiesterase beta, conserved site	IPR_Site	EXONT:000002,EXONT:000005	6
EXONT:005546	Vacuolar protein sorting-associated protein 13 domain	IPR_Domain	EXONT:000011	19
EXONT:005550	Domain of unknown function DUF1193	IPR_Domain	EXONT:000011	19
EXONT:005555	LsmAD domain	IPR_Domain	EXONT:000011	4
EXONT:005557	Enhancer of polycomb, C-terminal	IPR_Domain	EXONT:000011	10
EXONT:005569	RNA polymerase I, Rpa2 specific	IPR_Domain	EXONT:000002	2
EXONT:005571	Senescence/spartin-associated	IPR_Domain	EXONT:000011	5
EXONT:005572	Domain of unknown function DUF1279	IPR_Domain	EXONT:000011	5
EXONT:005581	Ribonuclease P/MRP, subunit POP1	IPR_Domain	EXONT:000002	3
EXONT:005582	Micro-fibrillar-associated protein 1, C-terminal	IPR_Domain	EXONT:000011	9
EXONT:005584	BAT2, N-terminal	IPR_Domain	EXONT:000011	14
EXONT:005588	Colon cancer-associated Mic1-like	IPR_Domain	EXONT:000011	6
EXONT:005595	Ribosome control protein 1	IPR_Domain	EXONT:000011	2
EXONT:005599	Ataxin-2, C-terminal	IPR_Domain	EXONT:000011	7
EXONT:005605	Modifier of rudimentary, Modr	IPR_Domain	EXONT:000011	18
EXONT:005606	T-complex protein 10, C-terminal domain	IPR_Domain	EXONT:000011	5
EXONT:005612	Galactose oxidase, beta-propeller	IPR_Domain	EXONT:000011	139
EXONT:005616	Nmi/IFP 35 domain	IPR_Domain	EXONT:000011	10
EXONT:005622	Nmi/IFP 35 domain, N-terminal	IPR_Domain	EXONT:000011	4
EXONT:005625	HARP domain	IPR_Domain	EXONT:000002	5
EXONT:005626	Domain of unknown function DUF1518	IPR_Domain	EXONT:000011	6
EXONT:005627	HAD-superfamily phosphatase, subfamily IIIC	IPR_Domain	EXONT:000011	6
EXONT:005638	Male sterility, NAD-binding	IPR_Domain	EXONT:000011	12
EXONT:005656	Proteinase inhibitor I9	IPR_Domain	EXONT:000011	2
EXONT:005657	Ferritin-related	IPR_Domain	EXONT:000011	14
EXONT:005659	ADAM-TS Spacer 1	IPR_Domain	EXONT:000002	82
EXONT:005660	Domain of unknown function DUF902, CREBbp	IPR_Domain	EXONT:000011	4
EXONT:005661	Survival motor neuron	IPR_Domain	EXONT:000005	13
EXONT:005662	Laminin II	IPR_Domain	EXONT:000011	19
EXONT:005663	E3 ubiquitin ligase, domain of unknown function DUF908	IPR_Domain	EXONT:000011	9
EXONT:005665	E3 ubiquitin ligase, domain of unknown function DUF913	IPR_Domain	EXONT:000011	10
EXONT:005668	TIP49, C-terminal	IPR_Domain	EXONT:000002,EXONT:000005	25
EXONT:005669	Domain of unknown function DUF959, collagen XVIII, N-terminal	IPR_Domain	EXONT:000011	1
EXONT:005670	Domain of unknown function, DUF971	IPR_Domain	EXONT:000011	4
EXONT:005673	PITH domain	IPR_Domain	EXONT:000011	6
EXONT:005676	Signaling lymphocytic activation molecule, N-terminal	IPR_Domain	EXONT:000003	2
EXONT:005678	RDD	IPR_Domain	EXONT:000011	4
EXONT:005680	Calcium-dependent secretion activator	IPR_Domain	EXONT:000011	21
EXONT:005681	PET domain	IPR_Domain	EXONT:000005	16
EXONT:005682	NUMB domain	IPR_Domain	EXONT:000011	5
EXONT:005683	Immunoglobulin C2-set-like, ligand-binding	IPR_Domain	EXONT:000011	5
EXONT:005684	Formin, diaphanous autoregulatory (DAD) domain	IPR_Domain	EXONT:000011	16
EXONT:005685	DRF autoregulatory	IPR_Domain	EXONT:000011	3
EXONT:005686	Hormone-sensitive lipase, N-terminal	IPR_Domain	EXONT:000002	5
EXONT:005687	Formin, FH3 domain	IPR_Domain	EXONT:000005	55
EXONT:005688	Formin, GTPase-binding domain	IPR_Domain	EXONT:000005	55
EXONT:005692	Peroxin/Dysferlin domain	IPR_Domain	EXONT:000011	11
EXONT:005698	PRP1 splicing factor, N-terminal	IPR_Domain	EXONT:000011	5
EXONT:005704	Epoxide hydrolase, N-terminal	IPR_Domain	EXONT:000011	3
EXONT:005705	Regulatory factor, effector binding domain	IPR_Domain	EXONT:000011	8
EXONT:005708	Molybdenum cofactor synthesis C-terminal	IPR_Domain	EXONT:000005	4
EXONT:005709	DMAP1-binding	IPR_Domain	EXONT:000005	17
EXONT:005710	Zinc finger, MYM-type	IPR_Domain	EXONT:000005	37
EXONT:005711	Domain of unknown function DUF1088	IPR_Domain	EXONT:000011	11
EXONT:005712	Peroxisomal fatty acyl CoA transporter, transmembrane domain	IPR_Domain	EXONT:000004,EXONT:000002,EXONT:000005	24
EXONT:005714	KEN domain	IPR_Domain	EXONT:000002	13
EXONT:005718	Collagenase NC10/endostatin	IPR_Domain	EXONT:000011	14
EXONT:005725	Sodium ion transport-associated	IPR_Domain	EXONT:000004	33
EXONT:005730	Vertebrate interleukin-3 regulated transcription factor	IPR_Domain	EXONT:000011	1
EXONT:005731	Repulsive guidance molecule, N-terminal	IPR_Domain	EXONT:000011	6
EXONT:005732	Domain of unknown function DUF1115	IPR_Domain	EXONT:000011	8
EXONT:005733	Vertebrate heat shock transcription factor, C-terminal domain	IPR_Domain	EXONT:000005	12
EXONT:005739	Protein of unknown function DUF1126	IPR_Repeat	EXONT:000011,EXONT:000007	8
EXONT:005740	Chondroitin sulphate attachment	IPR_Domain	EXONT:000011	2
EXONT:005742	Neogenin, C-terminal	IPR_Domain	EXONT:000011	13
EXONT:005743	Muskelin, N-terminal	IPR_Domain	EXONT:000011	7
EXONT:005746	Myotubularin-like phosphatase domain	IPR_Domain	EXONT:000002	111
EXONT:005749	Single-minded, C-terminal	IPR_Domain	EXONT:000005	7
EXONT:005750	MHC class I, alpha chain, C-terminal	IPR_Domain	EXONT:000011	12
EXONT:005751	Catalase immune-responsive domain	IPR_Domain	EXONT:000011	3
EXONT:005754	Connector enhancer of kinase suppressor of ras 2	IPR_Domain	EXONT:000011	8
EXONT:005755	Inter-alpha-trypsin inhibitor heavy chain, C-terminal	IPR_Domain	EXONT:000002	32
EXONT:005757	Mib-herc2	IPR_Domain	EXONT:000002,EXONT:000005	15
EXONT:005766	FAST kinase leucine-rich	IPR_Domain	EXONT:000002	9
EXONT:005770	CHCH	IPR_Domain	EXONT:000011	8
EXONT:005773	Neuroblastoma breakpoint family (NBPF) domain	IPR_Domain	EXONT:000011	175
EXONT:005775	Domain of unknown function DUF1227	IPR_Domain	EXONT:000011	6
EXONT:005779	Pre-mRNA cleavage complex II Clp1	IPR_Domain	EXONT:000011	6
EXONT:005785	Notch, NOD domain	IPR_Domain	EXONT:000011	4
EXONT:005787	Zinc finger, DNA glycosylase/AP lyase/isoleucyl tRNA synthetase	IPR_Domain	EXONT:000002	1
EXONT:005788	Zinc finger, GRF-type	IPR_Domain	EXONT:000005	11
EXONT:005791	Nucleolar GTP-binding protein 1, Rossman-fold domain	IPR_Domain	EXONT:000005	2
EXONT:005792	Bicoid-interacting 3	IPR_Domain	EXONT:000002	4
EXONT:005796	Dedicator of cytokinesis C-terminal	IPR_Domain	EXONT:000011	52
EXONT:005799	Coatomer, alpha subunit, C-terminal	IPR_Domain	EXONT:000005	11
EXONT:005800	RecQ helicase-like 5	IPR_Domain	EXONT:000011	2
EXONT:005804	HemN, C-terminal domain	IPR_Domain	EXONT:000011	4
EXONT:005808	Copine	IPR_Domain	EXONT:000011	45
EXONT:005809	Sperm-tail PG-rich repeat	IPR_Repeat	EXONT:000011,EXONT:000007	32
EXONT:005810	SGF29 tudor-like domain	IPR_Domain	EXONT:000011	4
EXONT:005815	Protein of unknown function DUF1388	IPR_Repeat	EXONT:000011,EXONT:000007	1
EXONT:005817	Prenylcysteine lyase	IPR_Domain	EXONT:000002	8
EXONT:005830	Occludin/RNA polymerase II elongation factor, ELL domain	IPR_Domain	EXONT:000011	18
EXONT:005838	CHRD	IPR_Domain	EXONT:000011	14
[truncated: 2,306 more rows]

## Sheet: Annotations per exon category
					InterPro		dbOGAP		dbPTM3		hUbuiquitome		PhosphoELM		PhosphoSitePlus		ProteomeScout		UniProt		IntAct		TMHMM		Localization		D2P2
	Exon type	#exons	#exons annotated	%annotated	NbExons	PercAnnotated	NbExons	PercAnnotated	NbExons	PercAnnotated	NbExons	PercAnnotated	NbExons	PercAnnotated	NbExons	PercAnnotated	NbExons	PercAnnotated	NbExons	PercAnnotated	NbExons	PercAnnotated	NbExons	PercAnnotated	NbExons	PercAnnotated	NbExons	PercAnnotated
	ALL exons	190617	170818	0.896132	124007	0.72596	134	0.000784461	40937	0.239653	33	0.000193188	9025	0.052834	63418	0.371261	67647	0.396018	84784	0.496341	22182	0.129858	14764	0.0864312	41647	0.243809	57431	0.336212
	CCE exons	90403	82512	0.912713	64444	0.781026	50	0.000605972	18230	0.220938	6	7.27167e-05	3661	0.0443693	29206	0.353961	31012	0.375848	40316	0.488608	11043	0.133835	5944	0.072038	18120	0.219604	23004	0.278796
	ACE exons	8078	6387	0.790666	4316	0.675748	4	0.000626272	1309	0.204948	0	0	293	0.0458744	2027	0.317363	2142	0.335369	2744	0.429623	721	0.112886	570	0.0892438	1288	0.20166	2106	0.329732
	FCE exons	8117	7305	0.899963	4553	0.623272	8	0.00109514	2083	0.285147	4	0.00054757	496	0.0678987	2935	0.40178	3288	0.450103	4064	0.556331	911	0.124709	804	0.110062	1913	0.261875	3942	0.53963
	LCE exons	17409	15443	0.88707	10399	0.67338	20	0.00129509	5264	0.340866	6	0.000388526	1483	0.0960306	7887	0.510717	8207	0.531438	8681	0.562132	2254	0.145956	1827	0.118306	5650	0.365862	4952	0.320663

## Sheet: First Coding Exons vs All
EO id	EO full id	EO name	EO category	Nb exons	Score	Z-score	P-value	FDR
1	EXONT:000001	ROOT		7505
74	EXONT:000074	Intrinsically_unstructured_polypeptide_region	EXONT:000007	3912	3.51576	38.7574	0	0
24	EXONT:000024	Compositionally_biased_region_of_peptide	EXONT:000007	451	0.289221	6.40384	7.5756e-11	6.26709e-10
153	EXONT:000153	Phosphorylated residue	EXONT:000008	2537	5.64745	4.80778	7.6309e-07	4.40849e-06
152	EXONT:000152	Phosphorus containing modified residue	EXONT:000008	2537	5.64745	4.80778	7.6309e-07	4.40849e-06
154	EXONT:000154	O-phosphorylated residue	EXONT:000008	2537	5.64683	4.80465	7.7512e-07	4.40849e-06
161	EXONT:000161	O-phospho-L-serine	EXONT:000008	1799	3.39348	4.75304	1.0019e-06	5.36311e-06
82	EXONT:000082	Modified L-threonine residue	EXONT:000008	1159	1.4438	4.6778	1.4499e-06	7.33005e-06
162	EXONT:000162	O-phospho-L-threonine	EXONT:000008	1141	1.40451	4.36725	6.291e-06	2.60219e-05
168	EXONT:000168	Acetylated residue	EXONT:000008	947	1.43174	4.28697	9.0564e-06	3.29653e-05
77	EXONT:000077	Modified L-serine residue	EXONT:000008	1849	3.5411	4.26341	1.0067e-05	3.52345e-05
169	EXONT:000169	N-acetylated residue	EXONT:000008	935	1.37436	3.49091	0.00024069	0.000608411
6	EXONT:000006	Localization	EXONT:000006	2980	4.09241	3.38752	0.00035264	0.000867304
7	EXONT:000007	Structure	EXONT:000007	5422	8.42782	2.68327	0.0036453	0.00691088
8	EXONT:000008	PTM	EXONT:000008	3717	9.44121	1.85868	0.031537	0.0441518
112	EXONT:000112	Acylated residue	EXONT:000008	1615	2.53846	1.84227	0.032718	0.0451112
115	EXONT:000115	N-acylated residue	EXONT:000008	1594	2.44427	1.41779	0.078126	0.101564
33	EXONT:000033	Transmembrane_polypeptide_region	EXONT:000007,EXONT:000006	842	1.29338	0.334286	0.36908	0.377374
71	EXONT:000071	Transmembrane_helix	EXONT:000007,EXONT:000006	842	1.29338	0.334286	0.36908	0.377374
32	EXONT:000032	Intramembrane_polypeptide_region	EXONT:000007,EXONT:000006	844	1.30414	0.15687	0.43767	0.43767
28	EXONT:000028	Membrane_structure	EXONT:000007,EXONT:000006	844	1.30414	0.15687	0.43767	0.43767
64	EXONT:000064	Nuclear_localization_signal	EXONT:000006	1100	1.56563	-0.389797	0.34834	0.364356
176	EXONT:000176	Modified glycine residue	EXONT:000008	937	1.04891	-0.423067	0.33612	0.355662
339	EXONT:000339	Isopeptide crosslinked residues	EXONT:000008	916	1.02708	-0.446815	0.3275	0.350618
315	EXONT:000315	Crosslinked residues with loss of water	EXONT:000008	915	1.02645	-0.457074	0.32381	0.350618
340	EXONT:000340	N6-glycyl-L-lysine	EXONT:000008	915	1.02645	-0.457074	0.32381	0.350618
1938	EXONT:001938	Cation binding	EXONT:000005	312	0.815721	-0.587931	0.27829	0.308834
1939	EXONT:001939	Metal ion binding	EXONT:000005	306	0.814247	-0.608237	0.27152	0.305041
1937	EXONT:001937	Ion binding	EXONT:000005	697	0.990592	-0.789204	0.215	0.244562
797	EXONT:000797	Ubiquitinylated lysine	EXONT:000008	896	0.960336	-0.896142	0.18509	0.213205
1904	EXONT:001904	Transferase activity	EXONT:000002	262	0.139722	-0.92158	0.17837	0.208098
180	EXONT:000180	N-acetylated L-lysine	EXONT:000008	489	0.995422	-0.971475	0.16566	0.19578
134	EXONT:000134	Modified L-lysine residue	EXONT:000008	1244	2.1219	-1.03892	0.14942	0.178911
35	EXONT:000035	Coiled_coil	EXONT:000007	249	0.0703321	-1.2031	0.11447	0.13889
34	EXONT:000034	Polypeptide_structural_motif	EXONT:000007	249	0.0703321	-1.2031	0.11447	0.13889
193	EXONT:000193	N6-acylated L-lysine	EXONT:000008	1212	1.56565	-1.25966	0.1039	0.129519
192	EXONT:000192	N6-acetyl-L-lysine	EXONT:000008	486	0.513825	-1.26802	0.1024	0.129422
1984	EXONT:001984	Anion binding	EXONT:000005	396	0.181127	-1.35306	0.088018	0.112812
753	EXONT:000753	N-acetylaminoglucosylated residue	EXONT:000008	344	0.355961	-1.77448	0.037992	0.0508422
752	EXONT:000752	N-acetylaminoglucosylated	EXONT:000008	344	0.355961	-1.77448	0.037992	0.0508422
1988	EXONT:001988	Small molecule binding	EXONT:000005	433	0.186895	-1.86595	0.031024	0.0441122
62	EXONT:000062	Nucleotide_binding_site	EXONT:000005	357	0.263023	-1.88307	0.029845	0.0431094
394	EXONT:000394	N-acetylhexosaminylated	EXONT:000008	350	0.365317	-1.93065	0.026763	0.0392812
397	EXONT:000397	N-acetylaminohexosylated residue	EXONT:000008	350	0.365317	-1.93065	0.026763	0.0392812
1999	EXONT:001999	Adenyl nucleotide binding	EXONT:000005	238	0.116989	-1.93629	0.026416	0.0392812
1997	EXONT:001997	Nucleotide binding	EXONT:000005	428	0.185401	-1.99192	0.02319	0.0357676
1987	EXONT:001987	Nucleoside phosphate binding	EXONT:000005	428	0.185401	-1.99192	0.02319	0.0357676
992	EXONT:000992	N4-(N-acetylamino)glucosyl-L-asparagine	EXONT:000008	325	0.336624	-1.99264	0.023151	0.0357676
991	EXONT:000991	N4-(N-acetylamino)hexosyl-L-asparagine	EXONT:000008	325	0.336624	-1.99264	0.023151	0.0357676
1998	EXONT:001998	Purine nucleotide binding	EXONT:000005	333	0.149347	-2.08063	0.018734	0.0309963
1992	EXONT:001992	Carbohydrate derivative binding	EXONT:000005	337	0.146568	-2.32265	0.010099	0.0170187
1885	EXONT:001885	Protein binding	EXONT:000005	1647	1.19368	-2.48064	0.0065574	0.0112589
1996	EXONT:001996	Adenyl ribonucleotide binding	EXONT:000005	234	0.11072	-2.49916	0.0062244	0.0108927
1986	EXONT:001986	ATP binding	EXONT:000005	234	0.11072	-2.49916	0.0062244	0.0108927
1994	EXONT:001994	Ribonucleotide binding	EXONT:000005	331	0.143388	-2.60044	0.0046552	0.00847246
1985	EXONT:001985	Purine ribonucleoside triphosphate binding	EXONT:000005	299	0.131402	-2.65424	0.0039744	0.00738103
1995	EXONT:001995	Purine ribonucleotide binding	EXONT:000005	328	0.142128	-2.71065	0.0033575	0.00650069
1993	EXONT:001993	Ribonucleoside binding	EXONT:000005	328	0.142128	-2.71065	0.0033575	0.00650069
1990	EXONT:001990	Purine nucleoside binding	EXONT:000005	328	0.142128	-2.71065	0.0033575	0.00650069
1989	EXONT:001989	Nucleoside binding	EXONT:000005	328	0.142128	-2.71065	0.0033575	0.00650069
1991	EXONT:001991	Purine ribonucleoside binding	EXONT:000005	328	0.142128	-2.71065	0.0033575	0.00650069
67	EXONT:000067	Nuclear_export_signal	EXONT:000006	511	0.404812	-3.00962	0.0013079	0.00283378
2	EXONT:000002	Catalytic activity	EXONT:000002	785	0.375816	-3.04764	0.0011532	0.00255954
123	EXONT:000123	Modified L-asparagine residue	EXONT:000008	330	0.384862	-3.21997	0.00064101	0.0014583
84	EXONT:000084	N-glycosylated residue	EXONT:000008	327	0.382367	-3.31014	0.00046625	0.00108792
382	EXONT:000382	N4-glycosyl-L-asparagine	EXONT:000008	327	0.381743	-3.33271	0.00043003	0.00102981
118	EXONT:000118	Crosslinked residues	EXONT:000008	1162	1.25493	-3.56269	0.00018354	0.000477204
11	EXONT:000011	Unclassified	EXONT:000011	2538	2.19098	-3.74183	9.1344e-05	0.00024448
80	EXONT:000080	Glycosylated residue	EXONT:000008	358	0.439753	-3.77641	7.9551e-05	0.000219368
79	EXONT:000079	Glycoconjugated residue	EXONT:000008	358	0.439753	-3.77641	7.9551e-05	0.000219368
25	EXONT:000025	Polypeptide_conserved_region	EXONT:000007	578	0.81361	-3.86701	5.5089e-05	0.000161713
27	EXONT:000027	Polypeptide_repeat	EXONT:000007	417	0.639397	-3.89179	4.9754e-05	0.00015092
5	EXONT:000005	Binding	EXONT:000005	2704	3.04767	-4.06192	2.4335e-05	7.63616e-05
37	EXONT:000037	Peptide_helix	EXONT:000007	1664	2.34667	-4.1017	2.0506e-05	6.66445e-05
51	EXONT:000051	Beta_strand	EXONT:000007	758	1.1257	-4.19668	1.3543e-05	4.56449e-05
1928	EXONT:001928	Organic cyclic compound binding	EXONT:000005	689	0.537963	-4.31804	7.8709e-06	2.98438e-05
1932	EXONT:001932	Heterocyclic compound binding	EXONT:000005	689	0.537963	-4.31804	7.8709e-06	2.98438e-05
1929	EXONT:001929	Nucleic acid binding	EXONT:000005	311	0.346561	-4.41487	5.0536e-06	2.18989e-05
164	EXONT:000164	O4'-phospho-L-tyrosine	EXONT:000008	909	0.848838	-4.54427	2.7564e-06	1.25416e-05
1893	EXONT:001893	Hydrolase activity	EXONT:000002	262	0.131806	-4.61853	1.9323e-06	9.2547e-06
163	EXONT:000163	Modified L-tyrosine residue	EXONT:000008	913	0.854677	-5.22896	8.5232e-08	5.96624e-07
21	EXONT:000021	Polypeptide_secondary_structure	EXONT:000007	1854	3.72815	-6.32335	1.2798e-10	9.70515e-10
22	EXONT:000022	Polypeptide_turn_motif	EXONT:000007	320	0.255778	-7.22445	2.5157e-13	2.28929e-12
292	EXONT:000292	Thiolated residue	EXONT:000008	260	0.228252	-8.72042	1.3859e-18	1.4013e-17
294	EXONT:000294	Disulfide conjugated residue	EXONT:000008	260	0.228252	-8.72042	1.3859e-18	1.4013e-17
121	EXONT:000121	L-cystine (cross-link)	EXONT:000008	259	0.227628	-8.74582	1.107e-18	1.4013e-17
119	EXONT:000119	Multisulfide crosslinked residues	EXONT:000008	259	0.227628	-8.74582	1.107e-18	1.4013e-17
120	EXONT:000120	Disulfide crosslinked residues	EXONT:000008	259	0.227628	-8.74582	1.107e-18	1.4013e-17
935	EXONT:000935	Cysteinylation (disulfide with free L-cysteine)	EXONT:000008	259	0.227628	-8.74582	1.107e-18	1.4013e-17
291	EXONT:000291	Sulfur containing modified residue	EXONT:000008	266	0.238856	-8.7906	7.4381e-19	1.4013e-17
122	EXONT:000122	Modified L-cysteine residue	EXONT:000008	300	0.508899	-8.95399	1.7143e-19	7.80007e-18

## Sheet: Internal Coding Exons vs All
EO id	EO full id	EO name	EO category	Nb exons	Score	Z-score	P-value	FDR
1	EXONT:000001	ROOT		82512
122	EXONT:000122	Modified L-cysteine residue	EXONT:000008	5445	1.17705	9.79701	5.7987e-23	2.93156e-22
25	EXONT:000025	Polypeptide_conserved_region	EXONT:000007	10268	1.38826	9.05662	6.728e-20	3.22236e-19
51	EXONT:000051	Beta_strand	EXONT:000007	9349	1.64835	8.3937	2.3555e-17	1.07175e-16
27	EXONT:000027	Polypeptide_repeat	EXONT:000007	8248	1.13925	8.04566	4.2892e-16	1.72827e-15
119	EXONT:000119	Multisulfide crosslinked residues	EXONT:000008	5095	0.568758	8.02839	4.9379e-16	1.72827e-15
120	EXONT:000120	Disulfide crosslinked residues	EXONT:000008	5095	0.568758	8.02839	4.9379e-16	1.72827e-15
935	EXONT:000935	Cysteinylation (disulfide with free L-cysteine)	EXONT:000008	5095	0.568758	8.02839	4.9379e-16	1.72827e-15
121	EXONT:000121	L-cystine (cross-link)	EXONT:000008	5095	0.568758	8.02839	4.9379e-16	1.72827e-15
291	EXONT:000291	Sulfur containing modified residue	EXONT:000008	5158	0.580264	7.75921	4.273e-15	1.29614e-14
294	EXONT:000294	Disulfide conjugated residue	EXONT:000008	5100	0.569537	7.07805	7.3097e-13	2.0787e-12
292	EXONT:000292	Thiolated residue	EXONT:000008	5100	0.569537	7.07805	7.3097e-13	2.0787e-12
118	EXONT:000118	Crosslinked residues	EXONT:000008	14412	1.66862	6.15602	3.7297e-10	1.02849e-09
2	EXONT:000002	Catalytic activity	EXONT:000002	12895	0.543508	5.40576	3.2267e-08	8.30223e-08
1885	EXONT:001885	Protein binding	EXONT:000005	21244	1.50797	4.94732	3.7622e-07	9.00948e-07
21	EXONT:000021	Polypeptide_secondary_structure	EXONT:000007	19044	4.59831	4.24656	1.0854e-05	2.5326e-05
22	EXONT:000022	Polypeptide_turn_motif	EXONT:000007	4438	0.408167	4.22885	1.1744e-05	2.6066e-05
1988	EXONT:001988	Small molecule binding	EXONT:000005	6950	0.261214	4.20744	1.2914e-05	2.79803e-05
1992	EXONT:001992	Carbohydrate derivative binding	EXONT:000005	5831	0.223446	4.16712	1.5424e-05	3.26415e-05
1999	EXONT:001999	Adenyl nucleotide binding	EXONT:000005	4684	0.186001	4.05872	2.4671e-05	5.10241e-05
1998	EXONT:001998	Purine nucleotide binding	EXONT:000005	5810	0.221877	4.03884	2.6858e-05	5.43128e-05
1984	EXONT:001984	Anion binding	EXONT:000005	6427	0.246133	4.0045	3.1074e-05	6.14725e-05
1987	EXONT:001987	Nucleoside phosphate binding	EXONT:000005	6842	0.258173	3.96606	3.6535e-05	6.92643e-05
1997	EXONT:001997	Nucleotide binding	EXONT:000005	6842	0.258173	3.96606	3.6535e-05	6.92643e-05
67	EXONT:000067	Nuclear_export_signal	EXONT:000006	6119	0.503371	3.77097	8.1306e-05	0.000150997
1994	EXONT:001994	Ribonucleotide binding	EXONT:000005	5779	0.218124	3.73116	9.5299e-05	0.000173444
1989	EXONT:001989	Nucleoside binding	EXONT:000005	5776	0.217804	3.70496	0.00010571	0.000181138
1996	EXONT:001996	Adenyl ribonucleotide binding	EXONT:000005	4641	0.181763	3.70072	0.00010749	0.000181138
1986	EXONT:001986	ATP binding	EXONT:000005	4638	0.181722	3.6973	0.00010895	0.000181138
1995	EXONT:001995	Purine ribonucleotide binding	EXONT:000005	5763	0.217586	3.687	0.00011346	0.000181138
1993	EXONT:001993	Ribonucleoside binding	EXONT:000005	5763	0.217586	3.687	0.00011346	0.000181138
1990	EXONT:001990	Purine nucleoside binding	EXONT:000005	5763	0.217586	3.687	0.00011346	0.000181138
1991	EXONT:001991	Purine ribonucleoside binding	EXONT:000005	5763	0.217586	3.687	0.00011346	0.000181138
1985	EXONT:001985	Purine ribonucleoside triphosphate binding	EXONT:000005	5218	0.201752	3.37806	0.00036499	0.000572657
797	EXONT:000797	Ubiquitinylated lysine	EXONT:000008	9279	1.06074	3.30658	0.00047222	0.000728339
1904	EXONT:001904	Transferase activity	EXONT:000002	3983	0.188408	3.26147	0.00055418	0.000840506
123	EXONT:000123	Modified L-asparagine residue	EXONT:000008	4335	0.539396	3.13903	0.00084755	0.00126438
84	EXONT:000084	N-glycosylated residue	EXONT:000008	4315	0.536669	2.9617	0.0015297	0.00220957
1893	EXONT:001893	Hydrolase activity	EXONT:000002	5614	0.220565	2.93135	0.0016875	0.00239941
382	EXONT:000382	N4-glycosyl-L-asparagine	EXONT:000008	4309	0.535422	2.88053	0.001985	0.002779
992	EXONT:000992	N4-(N-acetylamino)glucosyl-L-asparagine	EXONT:000008	4281	0.445056	2.81482	0.0024402	0.0033143
991	EXONT:000991	N4-(N-acetylamino)hexosyl-L-asparagine	EXONT:000008	4281	0.445056	2.81482	0.0024402	0.0033143
753	EXONT:000753	N-acetylaminoglucosylated residue	EXONT:000008	4377	0.457758	2.68995	0.0035731	0.00464503
752	EXONT:000752	N-acetylaminoglucosylated	EXONT:000008	4377	0.457758	2.68995	0.0035731	0.00464503
394	EXONT:000394	N-acetylhexosaminylated	EXONT:000008	4432	0.470537	2.56279	0.0051917	0.00656173
397	EXONT:000397	N-acetylaminohexosylated residue	EXONT:000008	4432	0.470537	2.56279	0.0051917	0.00656173
79	EXONT:000079	Glycoconjugated residue	EXONT:000008	4546	0.60732	2.45682	0.0070087	0.00873687
80	EXONT:000080	Glycosylated residue	EXONT:000008	4535	0.606359	2.397	0.0082649	0.0101636
176	EXONT:000176	Modified glycine residue	EXONT:000008	9464	1.10098	2.2402	0.012539	0.0150138
315	EXONT:000315	Crosslinked residues with loss of water	EXONT:000008	9450	1.09924	2.15734	0.01549	0.0178429
339	EXONT:000339	Isopeptide crosslinked residues	EXONT:000008	9450	1.09924	2.15734	0.01549	0.0178429
340	EXONT:000340	N6-glycyl-L-lysine	EXONT:000008	9450	1.09924	2.15734	0.01549	0.0178429
193	EXONT:000193	N6-acylated L-lysine	EXONT:000008	12656	1.67948	1.56217	0.059124	0.0672535
34	EXONT:000034	Polypeptide_structural_motif	EXONT:000007	3754	0.0946995	1.04799	0.14732	0.157719
35	EXONT:000035	Coiled_coil	EXONT:000007	3754	0.0946995	1.04799	0.14732	0.157719
134	EXONT:000134	Modified L-lysine residue	EXONT:000008	13001	2.25382	0.983037	0.16279	0.172255
180	EXONT:000180	N-acetylated L-lysine	EXONT:000008	4833	1.05295	0.927662	0.17679	0.184918
164	EXONT:000164	O4'-phospho-L-tyrosine	EXONT:000008	9125	0.95051	0.809091	0.20923	0.216363
192	EXONT:000192	N6-acetyl-L-lysine	EXONT:000008	4813	0.543877	0.429668	0.33372	0.337428
163	EXONT:000163	Modified L-tyrosine residue	EXONT:000008	9169	0.960484	0.319155	0.3748	0.3748
115	EXONT:000115	N-acylated residue	EXONT:000008	12806	2.20673	-0.474822	0.31746	0.324594
112	EXONT:000112	Acylated residue	EXONT:000008	12846	2.21761	-1.13601	0.12798	0.140315
7	EXONT:000007	Structure	EXONT:000007	47794	7.80012	-1.52344	0.063825	0.0708302
37	EXONT:000037	Peptide_helix	EXONT:000007	16996	2.5418	-1.53656	0.062201	0.0698801
169	EXONT:000169	N-acetylated residue	EXONT:000008	4995	1.06988	-2.25079	0.0122	0.0148027
8	EXONT:000008	PTM	EXONT:000008	37946	8.69963	-2.79121	0.0026255	0.00351354
168	EXONT:000168	Acetylated residue	EXONT:000008	5004	1.07368	-3.06774	0.0010784	0.00158281
24	EXONT:000024	Compositionally_biased_region_of_peptide	EXONT:000007	2929	0.147562	-4.23604	1.1375e-05	2.58781e-05
82	EXONT:000082	Modified L-threonine residue	EXONT:000008	10104	1.13857	-4.98612	3.0802e-07	7.57563e-07
162	EXONT:000162	O-phospho-L-threonine	EXONT:000008	10009	1.10849	-5.40259	3.2844e-08	8.30223e-08
152	EXONT:000152	Phosphorus containing modified residue	EXONT:000008	24036	4.36931	-7.93011	1.0948e-15	3.43541e-15
153	EXONT:000153	Phosphorylated residue	EXONT:000008	24026	4.3685	-7.94511	9.7011e-16	3.15286e-15
154	EXONT:000154	O-phosphorylated residue	EXONT:000008	24024	4.36827	-7.94946	9.3662e-16	3.15286e-15
11	EXONT:000011	Unclassified	EXONT:000011	34883	2.41918	-8.06003	3.8137e-16	1.6526e-15
62	EXONT:000062	Nucleotide_binding_site	EXONT:000005	3239	0.206589	-10.2202	8.0463e-25	4.30714e-24
161	EXONT:000161	O-phospho-L-serine	EXONT:000008	14928	2.30926	-10.3274	2.6482e-25	1.50616e-24
77	EXONT:000077	Modified L-serine residue	EXONT:000008	15036	2.3416	-10.355	1.9868e-25	1.20533e-24
5	EXONT:000005	Binding	EXONT:000005	36013	3.08783	-11.1986	2.0722e-29	1.34693e-28
64	EXONT:000064	Nuclear_localization_signal	EXONT:000006	10854	1.33375	-11.2521	1.1301e-29	7.9107e-29
1928	EXONT:001928	Organic cyclic compound binding	EXONT:000005	9607	0.541283	-11.7385	4.0469e-32	3.0689e-31
1932	EXONT:001932	Heterocyclic compound binding	EXONT:000005	9607	0.541283	-11.7385	4.0469e-32	3.0689e-31
32	EXONT:000032	Intramembrane_polypeptide_region	EXONT:000007,EXONT:000006	6439	0.987806	-13.2968	1.2072e-40	1.09855e-39
28	EXONT:000028	Membrane_structure	EXONT:000007,EXONT:000006	6439	0.987806	-13.2968	1.2072e-40	1.09855e-39
33	EXONT:000033	Transmembrane_polypeptide_region	EXONT:000007,EXONT:000006	6433	0.981094	-13.6351	1.2383e-42	1.40857e-41
71	EXONT:000071	Transmembrane_helix	EXONT:000007,EXONT:000006	6423	0.979127	-13.7344	3.1586e-43	4.10618e-42
6	EXONT:000006	Localization	EXONT:000006	24171	3.08696	-15.2197	1.3077e-52	1.98335e-51
1937	EXONT:001937	Ion binding	EXONT:000005	10363	0.744663	-16.3438	2.4059e-60	4.37874e-59
1929	EXONT:001929	Nucleic acid binding	EXONT:000005	3461	0.288598	-16.6445	1.6575e-62	3.77081e-61
74	EXONT:000074	Intrinsically_unstructured_polypeptide_region	EXONT:000007	22993	1.5626	-17.8976	6.1592e-72	1.86829e-70
1938	EXONT:001938	Cation binding	EXONT:000005	4167	0.510072	-21.7843	1.6353e-105	7.44061e-104
1939	EXONT:001939	Metal ion binding	EXONT:000005	4144	0.509467	-21.8244	6.8113e-106	6.19828e-104

## Sheet: Last Coding Exons vs All
EO id	EO full id	EO name	EO category	Nb exons	Score	Z-score	P-value	FDR
1	EXONT:000001	ROOT		15443
1938	EXONT:001938	Cation binding	EXONT:000005	1140	1.59307	32.2841	5.8421e-229	3.83806e-227
1939	EXONT:001939	Metal ion binding	EXONT:000005	1134	1.59277	32.2728	8.4353e-229	3.83806e-227
1929	EXONT:001929	Nucleic acid binding	EXONT:000005	1062	1.04045	29.3171	3.1369e-189	7.13645e-188
1937	EXONT:001937	Ion binding	EXONT:000005	1793	1.68482	26.7614	4.5498e-158	6.90053e-157
1928	EXONT:001928	Organic cyclic compound binding	EXONT:000005	1758	1.14518	22.3223	1.1219e-110	1.02093e-109
1932	EXONT:001932	Heterocyclic compound binding	EXONT:000005	1758	1.14518	22.3223	1.1219e-110	1.02093e-109
62	EXONT:000062	Nucleotide_binding_site	EXONT:000005	1030	0.662659	21.8418	4.6477e-106	3.84492e-105
5	EXONT:000005	Binding	EXONT:000005	6293	4.54689	19.3237	1.6977e-83	1.02994e-82
11	EXONT:000011	Unclassified	EXONT:000011	6011	3.33215	15.6064	3.2926e-55	1.07009e-54
64	EXONT:000064	Nuclear_localization_signal	EXONT:000006	3753	1.80683	8.2057	1.1463e-16	1.65577e-16
24	EXONT:000024	Compositionally_biased_region_of_peptide	EXONT:000007	1029	0.180676	-1.39132	0.082064	0.082064
82	EXONT:000082	Modified L-threonine residue	EXONT:000008	3356	1.21029	-1.68742	0.045762	0.0462705
162	EXONT:000162	O-phospho-L-threonine	EXONT:000008	3324	1.18505	-1.83607	0.033173	0.0339185
35	EXONT:000035	Coiled_coil	EXONT:000007	629	0.0575853	-2.40117	0.0081714	0.00844997
34	EXONT:000034	Polypeptide_structural_motif	EXONT:000007	629	0.0575853	-2.40117	0.0081714	0.00844997
1904	EXONT:001904	Transferase activity	EXONT:000002	599	0.0919844	-5.20034	9.9462e-08	1.05245e-07
163	EXONT:000163	Modified L-tyrosine residue	EXONT:000008	3006	0.818299	-6.20984	2.652e-10	2.8392e-10
1893	EXONT:001893	Hydrolase activity	EXONT:000002	709	0.113233	-6.27312	1.7694e-10	1.91685e-10
161	EXONT:000161	O-phospho-L-serine	EXONT:000008	4832	2.40714	-6.41255	7.1555e-11	7.84519e-11
164	EXONT:000164	O4'-phospho-L-tyrosine	EXONT:000008	2995	0.808578	-6.7459	7.6043e-12	8.43892e-12
192	EXONT:000192	N6-acetyl-L-lysine	EXONT:000008	1575	0.447907	-6.98807	1.3934e-12	1.56542e-12
1999	EXONT:001999	Adenyl nucleotide binding	EXONT:000005	446	0.0605113	-7.12488	5.2085e-13	5.92467e-13
1985	EXONT:001985	Purine ribonucleoside triphosphate binding	EXONT:000005	558	0.0818912	-7.12894	5.0572e-13	5.82538e-13
152	EXONT:000152	Phosphorus containing modified residue	EXONT:000008	6931	4.41013	-7.1727	3.6766e-13	4.28937e-13
1992	EXONT:001992	Carbohydrate derivative binding	EXONT:000005	608	0.0922793	-7.17334	3.6595e-13	4.28937e-13
77	EXONT:000077	Modified L-serine residue	EXONT:000008	4877	2.44557	-7.29102	1.5381e-13	1.84167e-13
153	EXONT:000153	Phosphorylated residue	EXONT:000008	6887	4.40093	-7.34287	1.0453e-13	1.2683e-13
154	EXONT:000154	O-phosphorylated residue	EXONT:000008	6887	4.40077	-7.34577	1.0229e-13	1.25789e-13
1996	EXONT:001996	Adenyl ribonucleotide binding	EXONT:000005	431	0.0580082	-7.36119	9.114e-14	1.13613e-13
1986	EXONT:001986	ATP binding	EXONT:000005	431	0.0580082	-7.36119	9.114e-14	1.13613e-13
1998	EXONT:001998	Purine nucleotide binding	EXONT:000005	608	0.0886761	-7.50377	3.1005e-14	3.97388e-14
6	EXONT:000006	Localization	EXONT:000006	6816	3.40567	-7.71087	6.2484e-15	8.12292e-15
1994	EXONT:001994	Ribonucleotide binding	EXONT:000005	595	0.0862434	-7.72747	5.4851e-15	7.23397e-15
1989	EXONT:001989	Nucleoside binding	EXONT:000005	592	0.0860871	-7.74185	4.8988e-15	6.55575e-15
1995	EXONT:001995	Purine ribonucleotide binding	EXONT:000005	591	0.086043	-7.74592	4.7448e-15	6.44443e-15
1993	EXONT:001993	Ribonucleoside binding	EXONT:000005	591	0.086043	-7.74592	4.7448e-15	6.44443e-15
1990	EXONT:001990	Purine nucleoside binding	EXONT:000005	591	0.086043	-7.74592	4.7448e-15	6.44443e-15
1991	EXONT:001991	Purine ribonucleoside binding	EXONT:000005	591	0.086043	-7.74592	4.7448e-15	6.44443e-15
1988	EXONT:001988	Small molecule binding	EXONT:000005	762	0.108289	-8.71823	1.4129e-18	2.07377e-18
22	EXONT:000022	Polypeptide_turn_motif	EXONT:000007	994	0.236453	-8.77532	8.5208e-19	1.27114e-18
1997	EXONT:001997	Nucleotide binding	EXONT:000005	747	0.10745	-8.79403	7.2147e-19	1.09423e-18
1987	EXONT:001987	Nucleoside phosphate binding	EXONT:000005	747	0.10745	-8.79403	7.2147e-19	1.09423e-18
1984	EXONT:001984	Anion binding	EXONT:000005	692	0.0960683	-8.82705	5.3736e-19	8.43099e-19
180	EXONT:000180	N-acetylated L-lysine	EXONT:000008	1579	0.870519	-9.37841	3.3486e-21	5.34601e-21
176	EXONT:000176	Modified glycine residue	EXONT:000008	2651	0.822985	-10.9525	3.2325e-28	5.25281e-28
339	EXONT:000339	Isopeptide crosslinked residues	EXONT:000008	2636	0.821165	-11.0524	1.0676e-28	1.76639e-28
315	EXONT:000315	Crosslinked residues with loss of water	EXONT:000008	2632	0.819222	-11.1591	3.2315e-29	5.44568e-29
340	EXONT:000340	N6-glycyl-L-lysine	EXONT:000008	2632	0.819222	-11.1591	3.2315e-29	5.44568e-29
122	EXONT:000122	Modified L-cysteine residue	EXONT:000008	1178	0.576902	-11.2269	1.5043e-29	2.63252e-29
992	EXONT:000992	N4-(N-acetylamino)glucosyl-L-asparagine	EXONT:000008	843	0.247561	-11.8809	7.435e-33	1.32664e-32
991	EXONT:000991	N4-(N-acetylamino)hexosyl-L-asparagine	EXONT:000008	843	0.247561	-11.8809	7.435e-33	1.32664e-32
67	EXONT:000067	Nuclear_export_signal	EXONT:000006	1335	0.284629	-11.953	3.1302e-33	5.81323e-33
753	EXONT:000753	N-acetylaminoglucosylated residue	EXONT:000008	889	0.259046	-11.9645	2.7247e-33	5.16558e-33
752	EXONT:000752	N-acetylaminoglucosylated	EXONT:000008	889	0.259046	-11.9645	2.7247e-33	5.16558e-33
797	EXONT:000797	Ubiquitinylated lysine	EXONT:000008	2536	0.768536	-11.9848	2.1349e-33	4.22339e-33
394	EXONT:000394	N-acetylhexosaminylated	EXONT:000008	903	0.270727	-12.0411	1.0808e-33	2.18562e-33
397	EXONT:000397	N-acetylaminohexosylated residue	EXONT:000008	903	0.270727	-12.0411	1.0808e-33	2.18562e-33
168	EXONT:000168	Acetylated residue	EXONT:000008	1624	0.886721	-12.516	3.0527e-36	6.61418e-36
169	EXONT:000169	N-acetylated residue	EXONT:000008	1622	0.883898	-12.6657	4.5816e-37	1.01689e-36
2	EXONT:000002	Catalytic activity	EXONT:000002	1942	0.301225	-12.6694	4.3712e-37	9.94448e-37
32	EXONT:000032	Intramembrane_polypeptide_region	EXONT:000007,EXONT:000006	1899	0.994455	-12.9629	9.926e-39	2.31607e-38
28	EXONT:000028	Membrane_structure	EXONT:000007,EXONT:000006	1899	0.994455	-12.9629	9.926e-39	2.31607e-38
33	EXONT:000033	Transmembrane_polypeptide_region	EXONT:000007,EXONT:000006	1898	0.989248	-13.2243	3.1748e-40	7.80829e-40
79	EXONT:000079	Glycoconjugated residue	EXONT:000008	973	0.373975	-13.2292	2.9751e-40	7.52039e-40
71	EXONT:000071	Transmembrane_helix	EXONT:000007,EXONT:000006	1894	0.987408	-13.3169	9.2356e-41	2.40126e-40
193	EXONT:000193	N6-acylated L-lysine	EXONT:000008	3578	1.30832	-13.3479	6.0924e-41	1.63061e-40
84	EXONT:000084	N-glycosylated residue	EXONT:000008	865	0.299891	-13.772	1.8786e-43	5.18038e-43
123	EXONT:000123	Modified L-asparagine residue	EXONT:000008	862	0.299198	-13.8253	8.9707e-44	2.55104e-43
80	EXONT:000080	Glycosylated residue	EXONT:000008	935	0.364776	-13.9009	3.1254e-44	9.17456e-44
382	EXONT:000382	N4-glycosyl-L-asparagine	EXONT:000008	854	0.297042	-13.9914	8.801e-45	2.66964e-44
134	EXONT:000134	Modified L-lysine residue	EXONT:000008	3673	1.79295	-14.2903	1.2571e-46	3.94469e-46
115	EXONT:000115	N-acylated residue	EXONT:000008	3618	1.74604	-15.9841	8.2503e-58	2.78066e-57
112	EXONT:000112	Acylated residue	EXONT:000008	3676	1.77332	-15.9955	6.8699e-58	2.40447e-57
291	EXONT:000291	Sulfur containing modified residue	EXONT:000008	968	0.258001	-16.0476	2.9691e-58	1.08075e-57
292	EXONT:000292	Thiolated residue	EXONT:000008	948	0.245457	-16.0497	2.8708e-58	1.08075e-57
121	EXONT:000121	L-cystine (cross-link)	EXONT:000008	948	0.245457	-16.0497	2.8708e-58	1.08075e-57
294	EXONT:000294	Disulfide conjugated residue	EXONT:000008	948	0.245457	-16.0497	2.8708e-58	1.08075e-57
119	EXONT:000119	Multisulfide crosslinked residues	EXONT:000008	948	0.245457	-16.0497	2.8708e-58	1.08075e-57
120	EXONT:000120	Disulfide crosslinked residues	EXONT:000008	948	0.245457	-16.0497	2.8708e-58	1.08075e-57
935	EXONT:000935	Cysteinylation (disulfide with free L-cysteine)	EXONT:000008	948	0.245457	-16.0497	2.8708e-58	1.08075e-57
1885	EXONT:001885	Protein binding	EXONT:000005	3750	1.00213	-17.5786	1.7955e-69	9.07725e-69
8	EXONT:000008	PTM	EXONT:000008	9192	7.3637	-17.6099	1.034e-69	5.53494e-69
118	EXONT:000118	Crosslinked residues	EXONT:000008	3504	1.06662	-18.4084	5.6197e-76	3.1962e-75
27	EXONT:000027	Polypeptide_repeat	EXONT:000007	925	0.622383	-19.6104	6.3062e-86	4.09903e-85
37	EXONT:000037	Peptide_helix	EXONT:000007	4225	1.92446	-20.689	2.1773e-95	1.52411e-94
25	EXONT:000025	Polypeptide_conserved_region	EXONT:000007	1408	0.753592	-21.8334	5.595e-106	4.24287e-105
74	EXONT:000074	Intrinsically_unstructured_polypeptide_region	EXONT:000007	4928	1.44733	-22.5002	2.0643e-112	2.34814e-111
51	EXONT:000051	Beta_strand	EXONT:000007	1904	0.894226	-24.119	7.9083e-129	1.02808e-127
21	EXONT:000021	Polypeptide_secondary_structure	EXONT:000007	4566	3.05514	-28.0015	7.7979e-173	1.41922e-171
7	EXONT:000007	Structure	EXONT:000007	9632	5.50137	-30.7987	1.3638e-208	4.13686e-207

## Sheet: ASE vs CE
EO id	EO full id	EO name	EO category	Nb exons	Score	Z-score	P-value	FDR
1	EXONT:000001	ROOT		6387
74	EXONT:000074	Intrinsically_unstructured_polypeptide_region	EXONT:000007	2106	1.87781	6.70285	1.022e-11	1.3286e-10
32	EXONT:000032	Intramembrane_polypeptide_region	EXONT:000007,EXONT:000006	611	1.16052	2.01755	0.021819	0.027199
28	EXONT:000028	Membrane_structure	EXONT:000007,EXONT:000006	611	1.16052	2.01755	0.021819	0.027199
33	EXONT:000033	Transmembrane_polypeptide_region	EXONT:000007,EXONT:000006	610	1.15447	1.87729	0.030239	0.0362072
71	EXONT:000071	Transmembrane_helix	EXONT:000007,EXONT:000006	609	1.15344	1.85323	0.031925	0.0377295
77	EXONT:000077	Modified L-serine residue	EXONT:000008	1145	2.60547	1.12265	0.13079	0.140022
161	EXONT:000161	O-phospho-L-serine	EXONT:000008	1136	2.55468	0.913301	0.18054	0.1838
1929	EXONT:001929	Nucleic acid binding	EXONT:000005	300	0.347393	0.908592	0.18178	0.1838
24	EXONT:000024	Compositionally_biased_region_of_peptide	EXONT:000007	236	0.149182	-0.0949716	0.46217	0.46217
154	EXONT:000154	O-phosphorylated residue	EXONT:000008	1740	4.58065	-1.0347	0.1504	0.155527
153	EXONT:000153	Phosphorylated residue	EXONT:000008	1740	4.58065	-1.0347	0.1504	0.155527
152	EXONT:000152	Phosphorus containing modified residue	EXONT:000008	1740	4.58065	-1.0347	0.1504	0.155527
62	EXONT:000062	Nucleotide_binding_site	EXONT:000005	239	0.207355	-1.15676	0.12368	0.133987
37	EXONT:000037	Peptide_helix	EXONT:000007	1362	2.62386	-1.41534	0.078484	0.0860487
1928	EXONT:001928	Organic cyclic compound binding	EXONT:000005	672	0.554311	-1.44839	0.073753	0.0818478
1932	EXONT:001932	Heterocyclic compound binding	EXONT:000005	672	0.554311	-1.44839	0.073753	0.0818478
82	EXONT:000082	Modified L-threonine residue	EXONT:000008	729	1.1356	-1.56268	0.059064	0.0671853
22	EXONT:000022	Polypeptide_turn_motif	EXONT:000007	314	0.386463	-1.6622	0.048236	0.055563
21	EXONT:000021	Polypeptide_secondary_structure	EXONT:000007	1505	4.67761	-1.7823	0.037351	0.0435762
64	EXONT:000064	Nuclear_localization_signal	EXONT:000006	804	1.32371	-1.89445	0.029083	0.0352874
51	EXONT:000051	Beta_strand	EXONT:000007	681	1.66729	-1.94683	0.025778	0.0317
35	EXONT:000035	Coiled_coil	EXONT:000007	192	0.0710002	-2.14071	0.016149	0.020698
34	EXONT:000034	Polypeptide_structural_motif	EXONT:000007	192	0.0710002	-2.14071	0.016149	0.020698
80	EXONT:000080	Glycosylated residue	EXONT:000008	273	0.563177	-2.16397	0.015233	0.0200899
79	EXONT:000079	Glycoconjugated residue	EXONT:000008	273	0.563177	-2.16397	0.015233	0.0200899
162	EXONT:000162	O-phospho-L-threonine	EXONT:000008	721	1.08654	-2.22476	0.013049	0.0177233
84	EXONT:000084	N-glycosylated residue	EXONT:000008	255	0.462289	-2.33323	0.0098181	0.0135371
164	EXONT:000164	O4'-phospho-L-tyrosine	EXONT:000008	655	0.939435	-2.38016	0.0086526	0.0121136
123	EXONT:000123	Modified L-asparagine residue	EXONT:000008	253	0.457107	-2.45158	0.0071116	0.0101118
382	EXONT:000382	N4-glycosyl-L-asparagine	EXONT:000008	252	0.45607	-2.4753	0.0066563	0.00961466
121	EXONT:000121	L-cystine (cross-link)	EXONT:000008	312	0.484849	-2.48955	0.0063952	0.0093865
119	EXONT:000119	Multisulfide crosslinked residues	EXONT:000008	312	0.484849	-2.48955	0.0063952	0.0093865
120	EXONT:000120	Disulfide crosslinked residues	EXONT:000008	312	0.484849	-2.48955	0.0063952	0.0093865
935	EXONT:000935	Cysteinylation (disulfide with free L-cysteine)	EXONT:000008	312	0.484849	-2.48955	0.0063952	0.0093865
1893	EXONT:001893	Hydrolase activity	EXONT:000002	312	0.184475	-2.535	0.0056224	0.00882135
1996	EXONT:001996	Adenyl ribonucleotide binding	EXONT:000005	253	0.137989	-2.53688	0.0055923	0.00882135
1986	EXONT:001986	ATP binding	EXONT:000005	253	0.137989	-2.53688	0.0055923	0.00882135
339	EXONT:000339	Isopeptide crosslinked residues	EXONT:000008	630	1.0199	-2.5651	0.0051573	0.00853299
1904	EXONT:001904	Transferase activity	EXONT:000002	275	0.148693	-2.56876	0.0051032	0.00853299
315	EXONT:000315	Crosslinked residues with loss of water	EXONT:000008	629	1.01959	-2.57013	0.005083	0.00853299
340	EXONT:000340	N6-glycyl-L-lysine	EXONT:000008	629	1.01959	-2.57013	0.005083	0.00853299
1994	EXONT:001994	Ribonucleotide binding	EXONT:000005	323	0.170833	-2.61421	0.0044717	0.00797892
1984	EXONT:001984	Anion binding	EXONT:000005	381	0.205878	-2.6396	0.0041502	0.00755336
291	EXONT:000291	Sulfur containing modified residue	EXONT:000008	316	0.491069	-2.68357	0.0036421	0.0067639
1992	EXONT:001992	Carbohydrate derivative binding	EXONT:000005	326	0.180274	-2.71268	0.0033371	0.00632659
1985	EXONT:001985	Purine ribonucleoside triphosphate binding	EXONT:000005	295	0.155469	-2.7747	0.0027626	0.00534886
1995	EXONT:001995	Purine ribonucleotide binding	EXONT:000005	316	0.16701	-2.77777	0.0027366	0.00534886
1993	EXONT:001993	Ribonucleoside binding	EXONT:000005	316	0.16701	-2.77777	0.0027366	0.00534886
1990	EXONT:001990	Purine nucleoside binding	EXONT:000005	316	0.16701	-2.77777	0.0027366	0.00534886
1989	EXONT:001989	Nucleoside binding	EXONT:000005	316	0.16701	-2.77777	0.0027366	0.00534886
1991	EXONT:001991	Purine ribonucleoside binding	EXONT:000005	316	0.16701	-2.77777	0.0027366	0.00534886
122	EXONT:000122	Modified L-cysteine residue	EXONT:000008	347	1.02982	-2.80136	0.0025444	0.00534886
163	EXONT:000163	Modified L-tyrosine residue	EXONT:000008	655	0.941508	-2.82674	0.0023512	0.00534886
168	EXONT:000168	Acetylated residue	EXONT:000008	341	1.02063	-2.88636	0.0019486	0.00454673
176	EXONT:000176	Modified glycine residue	EXONT:000008	629	1.02063	-2.88636	0.0019486	0.00454673
1999	EXONT:001999	Adenyl nucleotide binding	EXONT:000005	256	0.141119	-2.89955	0.0018685	0.00454673
797	EXONT:000797	Ubiquitinylated lysine	EXONT:000008	616	0.977096	-2.9457	0.0016111	0.0040725
192	EXONT:000192	N6-acetyl-L-lysine	EXONT:000008	311	0.507205	-2.98715	0.001408	0.0036608
1988	EXONT:001988	Small molecule binding	EXONT:000005	410	0.207644	-3.06643	0.0010832	0.00289915
193	EXONT:000193	N6-acylated L-lysine	EXONT:000008	823	1.57582	-3.12774	0.00088078	0.00242882
1998	EXONT:001998	Purine nucleotide binding	EXONT:000005	320	0.170507	-3.12816	0.00087952	0.00242882
1997	EXONT:001997	Nucleotide binding	EXONT:000005	401	0.204405	-3.20071	0.00068544	0.0020121
1987	EXONT:001987	Nucleoside phosphate binding	EXONT:000005	401	0.204405	-3.20071	0.00068544	0.0020121
394	EXONT:000394	N-acetylhexosaminylated	EXONT:000008	265	0.410809	-3.29185	0.00049765	0.00156159
397	EXONT:000397	N-acetylaminohexosylated residue	EXONT:000008	265	0.410809	-3.29185	0.00049765	0.00156159
115	EXONT:000115	N-acylated residue	EXONT:000008	846	2.08406	-3.45842	0.00027168	0.000915662
112	EXONT:000112	Acylated residue	EXONT:000008	854	2.11412	-3.46844	0.00026174	0.000915662
1937	EXONT:001937	Ion binding	EXONT:000005	657	0.62197	-3.54529	0.00019609	0.000713768
2	EXONT:000002	Catalytic activity	EXONT:000002	868	0.489788	-3.56831	0.00017964	0.000681135
292	EXONT:000292	Thiolated residue	EXONT:000008	313	0.485886	-3.69944	0.00010804	0.000427463
294	EXONT:000294	Disulfide conjugated residue	EXONT:000008	313	0.485886	-3.69944	0.00010804	0.000427463
7	EXONT:000007	Structure	EXONT:000007	3813	7.72258	-3.70424	0.00010601	0.000427463
118	EXONT:000118	Crosslinked residues	EXONT:000008	926	1.50475	-3.72707	9.6859e-05	0.000427463
753	EXONT:000753	N-acetylaminoglucosylated residue	EXONT:000008	260	0.383513	-3.76869	8.2054e-05	0.000392995
752	EXONT:000752	N-acetylaminoglucosylated	EXONT:000008	260	0.383513	-3.76869	8.2054e-05	0.000392995
134	EXONT:000134	Modified L-lysine residue	EXONT:000008	851	2.11585	-3.78329	7.7385e-05	0.000392995
992	EXONT:000992	N4-(N-acetylamino)glucosyl-L-asparagine	EXONT:000008	251	0.367966	-3.83377	6.3098e-05	0.00035887
991	EXONT:000991	N4-(N-acetylamino)hexosyl-L-asparagine	EXONT:000008	251	0.367966	-3.83377	6.3098e-05	0.00035887
8	EXONT:000008	PTM	EXONT:000008	2569	8.53826	-4.23443	1.1456e-05	7.4464e-05
1938	EXONT:001938	Cation binding	EXONT:000005	292	0.424928	-4.29394	8.7765e-06	6.14355e-05
1939	EXONT:001939	Metal ion binding	EXONT:000005	288	0.424029	-4.3255	7.6095e-06	5.77054e-05
169	EXONT:000169	N-acetylated residue	EXONT:000008	338	1.01441	-4.48367	3.6685e-06	3.03485e-05
180	EXONT:000180	N-acetylated L-lysine	EXONT:000008	316	0.989534	-4.60498	2.0625e-06	1.87687e-05
6	EXONT:000006	Localization	EXONT:000006	1892	3.15537	-5.55978	1.3506e-08	1.36561e-07
1885	EXONT:001885	Protein binding	EXONT:000005	1404	1.31229	-6.58809	2.2276e-11	2.53389e-10
67	EXONT:000067	Nuclear_export_signal	EXONT:000006	357	0.353732	-6.85673	3.5227e-12	5.34276e-11
27	EXONT:000027	Polypeptide_repeat	EXONT:000007	399	0.748802	-8.03563	4.6552e-16	8.47246e-15
25	EXONT:000025	Polypeptide_conserved_region	EXONT:000007	521	0.93989	-8.24563	8.2146e-17	1.86882e-15
5	EXONT:000005	Binding	EXONT:000005	2368	2.67147	-8.47035	1.2233e-17	3.71068e-16
11	EXONT:000011	Unclassified	EXONT:000011	2327	1.98974	-9.74065	1.0112e-22	4.60096e-21
