# Supplementary material for: Identification of protein features encoded by alternative exons using Exon Ontology
Source: Genome Res. 2017 Jun;27(6):1087–97. doi: 10.1101/gr.212696.116 (PMC5453322; doi:10.1101/gr.212696.116)
Supplement: Supplemental Material [file supp_gr.212696.116_Supplemental_Table_S4.xlsx]

## Sheet: Summary
Supplemental Table S4: Characteristics of the exons differentially spliced in epithelial- and mesenchymal-like cells
Sheet 1: List of the 81 selected exons, genomic coordinates, RT-PCR and RNA seq deltaPsi variations.
Sheet 2: List of the selected exons regulated by epithelial- and/or mesenchymal-enriched splicing factors.
Sheet 3: “Mapping” tab of the “81 selected exons”
Sheet 4: “Sequences” tab of the “81 selected exons”
Sheet 5: “Exon Annotations” of the “81 selected exons”
Sheet 6: “PTM Annotations” of the “81 selected exons”
Sheet 7: “Protein features” of the “81 selected exons”
Sheet 8: Partners of the genes bearing one of the “81 selected exons”.

## Sheet: "81" ASEs
Gene_name	Exon_id	Protein sequence	Exon_regulation (mesenchymal vs epithelial)		chromosome	start_on_chromosome	end_on_chromosome	strand	RNA-seq (deltaPSI FvsE)	RT-PCR (deltaPSI F vs E)	RNA-seq (deltaPSI CL vs L)	RT-PCR (deltaPSI CL vs L)	RT-PCR (deltaPSI, %, MDA vs MCF7)	RT-PCR (deltaPSI, %, siESRP1&2 vs CTRL, MCF-7)	RT-PCR (deltaPSI, %, siRBM47 vs CTRL, MCF-7)	RT-PCR (deltaPSI, %, siMBNL1&2 vs CTRL, MDA)	RT-PCR (deltaPSI, %, siRBFOX2 vs CTRL, MDA)
ABI1	10	ISIAPPPPPMPQLTPQIPLTGFVARVQENI	up	ABI1_10_up	10	27044584	27044670	-1	0.116446	0.1974	0.258368	0.2978	56.03	-0.05	12.53	11.03	-59.78
ADD3	16	DAEQELLSDDASSVSQIQSQTQSPQNVPEKLEE	down	ADD3_16_down	10	111892063	111892158	1	-0.313379	-0.3332	-0.77643	-0.5334	-41.3	-2.44	-16.56	11.2	47.5
APLP2	8	AVCSQEAMTGPCRAVMPRWYFDLSKGKCVRFIYGGCGGNRNNFESEDYCMAVCKAMI	down	APLP2_8_down	11	129993507	129993674	1	-0.382967	-0.382967	-0.287195	-0.3588	-42.31	-21.92	-5.36	-7.1	-1.37
ARFGAP2	8	ESVYLSAKGALPARE	down	ARFGAP2_8_down	11	47194261	47194302	-1	-0.691135	-0.4488	-0.49739	-0.3675	-43.43	-45.96	-1.37	-9.78	-10.05
ARHGAP17	17	SFGVKLMDFQAHRRGGTLNRKHISPAFQPPLPPTDGSTVVPAGPEPPPQSSRAESSSGGGTVPSSAGILEQGPSPGDGS	up	ARHGAP17_17_up	16	24950685	24950918	-1	0.683069	0.5133	0.435284	0.4399	42.79	23.72	-9.27	1	-2.32
ATP5C1	9	LD	down	ATP5C1_9_down	10	7848937	7848973	1	-0.386877	-0.3495	-0.377247	-0.0961	-0.96	0.31	-0.69	-2.22	-0.7
CA12	9	VQVCTAAGLSLG	down	CA12_9_down	15	63620297	63620329	-1	-0.584393	-0.6774	-0.993969	-0.4722	-9.14	-28.94	-23.05	-14.2	-60.03
CAST	8	AIPVSQQMEGPHLPNKKKHKKQ	up	CAST_8_up	5	96062498	96062563	1	0.356184	0.3445	0.154183	0.1022	8.69	3.38	3.6	-1.47	-5
CCDC57	11	RYKQQLSLAVERERSLERDQVQLGLDWQRRCDDIERDQIQKSEALIQGLSMAKSQ	down	CCDC57_11_down	17	80136903	80137065	-1	-0.235294	-0.0413	-0.337533	-0.0251	4.99	-17.64	1.86	-2.06	-3.23
CD46	13	GTYLTDETHREVKFTSL	up	CD46_13_up	1	207963598	207963690	1	0.198044	0.2085	0.435355	0.5826	47.14	8.18	-0.58	-34.45	-41.83
CD99L2	3		down	CD99L2_3_down	X	149996779	149998077	-1	-0.698742	-0.2892	-0.329738	-0.2301	-26.28	-20.1	3.61	-0.96	-2.92
CLSTN1	11	EFSGVENDNETEPVTVASAG	up	CLSTN1_11_up	1	9797556	9797612	-1	0.633079	0.5827	0.419511	0.3157	34.39	2.52	2.7	-24.36	-31.74
CLSTN1	3	ESFEVTVTKEG	up	CLSTN1_3_up	1	9816539	9816568	-1	0.291436	0.3313	0.879538	0.6918	83.53	3.73	6.74	-18.91	-88.81
CSNK1G3	13	NCQKVLNMW	up	CSNK1G3_13_up	5	122941033	122941056	1	0.349116	0.4519	0.43313	0.3042	18.26	4.33	-1.46	-17.5	-20.7
CTNND1	4		up	CTNND1_4_up	11	57556509	57556627	1	0.702538	0.4126	0.785206	0.376	25.18	33.07	-4.8	-0.31	-8.33
DLG1	24	EIPDDMGSKGLK	down	DLG1_24_down	3	196802708	196802741	-1	-0.186449	0.043	-0.351648	-0.056	-13.02	-1.64	0.26	0.97	0.55
ENAH	12	RRDSPRKNQIVFDNRSYDSLHR	down	ENAH_12_down	1	225692693	225692755	-1	-0.380363	-0.3747	-0.746754	-0.5969	-33.99	-36.32	-5.39	0.66	-4.54
ESYT2	16	SNPLEFNPDVLKKTAVQRALK	down	ESYT2_16_down	7	158545472	158545534	-1	-0.564444	-0.4085	-0.782145	-0.6053	-41.64	-20.37	-11.79	-6.63	6.62
EVI5L	12	ESAALADRLIQ	up	EVI5L_12_up	19	7921865	7922010	1	0.62799	0.5092	0.151515	0.3379	23.1	2.08	-2.41	-1.74	-24.42
EXOC1	11	ATLPRKESAVKQETES	down	EXOC1_11_down	4	56755054	56755098	1	-0.29597	-0.2611	-0.731719	-0.463	-29.05	-18.59	-11.56	53.22	49.78
EXOC7	7	GTIRKAQNLLKQYSQHGLDGKKGGSNLIPLEG	up	EXOC7_7_up	17	74087224	74087316	-1	0.78423	0.4395	0.683208	0.7423	38.951	54.87	-11.97	-16.51	-2.22
FAM126A	11	EQPDNNNDATELGILVIPEISVTNVAGERTGNGEKGRTLGEIDAQHIQGVQETATDPRTESKGLPEIRRQKSVRKMMEDGINSPGRVQF	up	FAM126A_11_up	7	22986571	22986866	-1	0.296241	0.432	0.35396	0.31029	52.8	3.39	5.27	19.75	-47.83
FAT1	29		up	FAT1_29_up	4	187511522	187511557	-1	0.630677	0.5482	0.213889	-0.0257	13.36	1.21	2.09	-6.91	-9.17
FGFR1	12	HSGINSSDAEVLTLFNVTEAQSGEYVCKVSNYIGEANQSAWLTVTRPVAKA	down	FGFR1_12_down	8	38280543	38280693	-1	-0.487377	-0.2073	-0.200065	-0.0222	-4.3	-7.49	-9.52	3.97	4.69
FGFR1OP2	5	IDMVHRNKSEGFFLDASRHILEAPQHGLERRHLEANQN	up	FGFR1OP2_5_up	12	27113448	27113561	1	0.322277	0.2412	0.387255	0.3618	39.45	-6.79	14.71	6.26	-0.76
FLNB	33	ATDGEVTAVEEAPVNACPPGFRPW	down	FLNB_33_down	3	58127585	58127656	1	-0.128385	-0.2322	-0.845354	-0.5997	-78.71	-43.36	0.54	-14.99	-7.89
FNIP1	7	GLSQFCSPRRAFSEQGPLRLIRSASFFAV	down	FNIP1_7_down	5	131046271	131046354	-1	-0.767762	-0.4514	-0.84592	-0.6548	-60.52	-28.24	-3.79	-14.13	-22.54
HPS4	11	GKWMLWSFKNRVTHQNPNG	up	HPS4_11_up	22	26862017	26862070	-1	0.129362	-0.0669	0.251429	0.3035	14.22	-6.09	-5.24	-11.84	-14.22
KIAA0182	3	GMSHEPKSPSLGMLSTATRTTATVNPLTPSPLNGALVPSGSPATSSALSAQAAPSSSFAAALRKLAKQAEEPRG	up	KIAA0182_3_up	16	85667520	85667738	1	0.4	0.0483	0.2878	0.5132	9.87	10.33	-3.78	16.93	9.92
RUBCN (KIAA0226)	14	DGSEGSNLTHISKNGLSVSLASMFSD	up	RUBCN (KIAA0226)_14_up	3	197417945	197418019	-1	0.249338	0.4996	0.362178	0.3227	25.73	4.78	1.29	-34.28	-29.66
KIF13A	27	RDDEDGDDMDSYQ	up	KIF13A_27_up	6	17790103	17790141	-1	0.152884	0.1029	0.311363	0.1649	50.93	-17.79	-8.8	-81.09	-84.19
KIF13A	39	SMPPPQAHNPGCIVPSGSNGSSMPVEHNNKREKKI	down	KIF13A_39_down	6	17771345	17771449	-1	-0.55536	-0.3587	-0.733555	-0.3652	16.48	22.27	3.21	8.79	10.95
LAS1L	9	DGQTEVQRGEGTDPKSHK	up	LAS1L_9_up	X	64744444	64744494	-1	0.283268	0.1467	0.318635	0.1818	-1.28	12.59	-0.09	-4.56	-4.43
LRRC14	2		down	LRRC14_2_down	8	145744133	145744199	1	-0.383492	-0.1824	-0.238736	-0.2071	-84.72	-97.73	-8.88	-2.68	2.74
LRRFIP2	20	DIYDLKDQIQDVEGRYMQGLKELK	up	LRRFIP2_20_up	3	37132958	37133029	-1	0.165786	0.0737	0.707663	0.5025	40.17	-3.89	6.43	-28.96	-56.19
LSM14B	8	DVVQPAAVQAQGQVNDENRRPQRRRSG	up	LSM14B_8_up	20	60705275	60705352	1	0.137288	0.0928	0.101811	0.0594	-10.54	0.2	-8.74	-1.69	-3.47
MADD	17	VFGLNTLMEIVTEAGPGSGEG	up	MADD_17_up	11	47310519	47310578	1	0.229492	0.2623	0.117983	0.1768	60.19	0.48	1.08	-43.24	-65.58
MAP3K7	12	AYSKPKRGHRKTASFGNILDVPEIVISG	down	MAP3K7_12_down	6	91254271	91254351	-1	-0.188787	-0.2675	-0.88568	-0.6367	-51.24	-27.57	-6.7	-1.56	40.89
MBNL1	10	TQSAVKSLKRPLEATFDL	down	MBNL1_10_down	3	152164493	152164546	1	-0.311176	-0.4156	-0.374578	-0.3492	-36.23	-15.57	11.71	56.21	-3.23
MINK1	19	RPRSNSAWQIYLQRRAERGTPKPPGPPAQPPGPPNASS	down	MINK1_19_down	17	4795697	4795807	1	-0.271855	-0.2408	-0.144855	-0.1174	-4.52	-7.41	-0.45	-7.59	-1.09
MLPH	10	IFELNKHISAVECLLTYLENTVVPPLAK	up	MLPH_10_up	2	238443207	238443290	1	0.43205	0.3927	0.447101	0.4385	49.69	35.78	-5.84	1.12	1.12
MPRIP	24	SVIEQVSWDT	up	MPRIP_24_up	17	17083921	17083983	1	0.228165	0.3596	0.319296	0.3409	83.08	1.18	9.25	-5.57	-82.49
MYOF	18	DFSSSGTGAASYTV	up	MYOF_18_up	10	95152674	95152712	-1	0.20282	0.1921	0.741056	0.3131	43.7	30.9	8.51	-11.91	-4.79
NBEAL2	11	LYLQSRAPPEGDSDLATRLLTEPDVQK	down	NBEAL2_11_down	3	47033965	47034045	1	-0.127276	-0.5072	-0.579513	-0.6316	-32.13	-29.39	-1.09	-2.05	-1.35
NEDD4L	18	PSAPAGRARSSTVTGGEEPT	down	NEDD4L_18_down	18	56002710	56002769	1	-0.12666	-0.1491	-0.767392	-0.4784	-46.36	-16.32	-14.11	-6.73	0.15
NFIB	14	LRICDWTMNQNGRHLYPSTSEDTLGITWQS	down	NFIB_14_down	9	14102416	14102509	-1	-0.316376	-0.4219	-0.505903	-0.3191	-3.17	-12.82	-5.18	-2.63	-8.41
NFYA	4	QQGGVTAVQLQTEAQVASASGQQVQTLQV	up	NFYA_4_up	6	41048550	41048636	1	0.46864	0.4099	0.683544	0.596	66.23	5.99	1.83	-44.93	-69.56
NHSL1	6	GENFDRQASLRRSLIYTDTLVRRPKKVKRRKTITGVPDNIQKELA	down	NHSL1_6_down	6	138763120	138763251	-1	-0.200554	-0.1214	-0.485298	-0.2662	0.92	5.65	-8.58	10.27	11
NUMA1	20	VEQLEVFQREQTKQ	up	NUMA1_20_up	11	71723447	71723488	-1	0.111059	0.0236	0.16182	0.0969	26.94	-22.46	4.14	-69.28	-63.8
NUMB	11	ANGTDSAFHVLAKPAHTALAPVAMPVRETNPWAHAPDAANKEIAATCSG	down	NUMB_11_down	14	73745989	73746132	-1	-0.294761	-0.3763	-0.549093	-0.436	-24.58	-3.21	10.26	62.33	36.71
PBRM1	32	GMMGGYPPGLPPLQGPVDGLVSMGSMQPLHPGGPPPHHLPPGVPGLPGIPPPG	down	PBRM1_32_down	3	52588740	52588895	-1	-0.576643	-0.1318	-0.164898	-0.1044	-5.9	-0.77	-1.69	0.4	5.06
PCYT2	8	PPHPIPAGDILSSEGCSQ	down	PCYT2_8_down	17	79865080	79865133	-1	-0.456536	-0.2815	-0.219874	-0.3308	-0.1726	-21.58	13.7	-3.73	-1.84
PDGFA	6	GRPRESGKKRKRKRLKPT	down	PDGFA_6_down	7	540068	540136	-1	-0.151921	-0.2105	-0.623188	-0.5744	-42.6	-40.12	-27.05	-6.15	1.2
PHLDB1	23	VESLPAEPLPTDDPAG	up	PHLDB1_23_up	11	118515365	118515409	1	0.135472	0.1718	0.1875	0.0851	16.61	0.55	2.2	-13.06	-14.46
PLEKHA1	15	MRQARRLSNPCIQRYTSRAGECSTYVGSHANVPS	up	PLEKHA1_15_up	10	124187792	124187936	1	0.723939	0.7816	0.717489	0.5871	14.86	-0.18	-5.02	-2.26	4.99
PLOD2	14	TLQREKDSPTPETFQMLSPPK	up	PLOD2_14_up	3	145795649	145795711	-1	0.28883	0.3803	0.47155	0.3059	46.2	4.22	10.48	-37.13	-39.55
PPP3CB	16	ATVEAIEAEKA	down	PPP3CB_16_down	10	75199630	75199659	-1	-0.155446	-0.4219	-0.467728	-0.3191	-22.09	-13.76	-12.94	-19.18	22.12
RAB11FIP3	7	STDPLAAKLHSILTDEAFEFYCSQCHKQINRLEDLSARLSDLEMNS	up	RAB11FIP3_7_up	16	541134	541268	1	0.117156	-0.0202	0.477926	0.3228	21.56	-2.23	5.31	-7.69	-62
RAI14	15	HDQVSKISSERSGTPKKRKAPPPPISPTQ	down	RAI14_15_down	5	34813679	34813765	1	-0.4503	-0.5624	-0.562873	-0.3307	-9.24	-3.31	-2.85	-7.69	4.32
RALGPS2	15	RNRLYHSLGPVTRVARNGYRSHMKASS	down	RALGPS2_15_down	1	178861365	178861442	1	-0.601131	-0.6914	-0.777482	-0.6431	-58.55	-59.51	7.39	-0.52	-6.49
ROBO1	20	VPSFTFTPTV	down	ROBO1_20_down	3	78696779	78696805	-1	-0.260285	-0.1164	-0.576918	-0.1991	-9.77	-11.58	3.62	1.07	11.29
SEC31A	20	ALKDSDQVAQSDGEESPAAEEQLLGE	up	SEC31A_20_up	4	83782784	83782861	-1	0.12407	0.1488	0.14883	0.1175	25.12	7.37	6.16	8.27	0.29
SLK	15	VINEVEKAPKELRKELMKRRKEELAQSQHAQ	down	SLK_15_down	10	105770574	105770666	1	-0.456628	-0.4562	-0.904762	-0.7639	-58.39	-55.93	-10.15	0.65	2.04
SLMAP	24	PSILQPVPAVFIGLFLAFLFWCFGPLW	up	SLMAP_24_up	3	57911572	57911661	1	0.268395	0.024	0.73763	0.0361	58.73	13.34	-1.36	-5.02	-18.32
SMARCC2	29	AQSPAIVAAVQGNLLPSASPLPD	down	SMARCC2_29_down	12	56558087	56558152	-1	-0.24804	-0.1853	-0.412506	-0.303	-14.72	6.37	-6.42	-4.94	-11.48
SNX14	19	RGSLSLDDFR	up	SNX14_19_up	6	86248556	86248582	-1	0.400328	0.3219	0.203226	0.1603	-3.66	-7.55	-17.37	-25.26	-30.74
SPAG9	29	TVILHQGRLLGLRA	up	SPAG9_29_up	17	49053224	49053262	-1	0.77126	0.6371	0.576234	0.2882	44.37	5.8	-1.53	-43.66	-47.61
SPTAN1	24	QTRITKEAGSVSLRMKQVEEL	down	SPTAN1_24_down	9	131355262	131355321	1	-0.529398	-0.4337	-0.512375	-0.63	-44.43	-18.91	1.44	-38.47	-25.39
ST7	15	EIRSRVEVPLIASSTIWEIKLLPK	up	ST7_15_up	7	116774178	116774246	1	0.0985181	0.0608	0.781305	0.3545	45.66	6.71	7.8	-14.45	-49.22
STX2	10	KKWIIIAVSVVLVAIIALIIGLSVGK	down	STX2_10_down	12	131280540	131280665	-1	-0.310769	-0.3267	-0.634286	-0.4434	-43.83	-7.38	-3.12	29.93	43.69
SULF2	20	RQFQRRKWPEMKRPSSKSL	up	SULF2_20_up	20	46288143	46288196	-1	0.48654	0.2101	0.66313	0.3179		30.96	-4.31
TBC1D23	15	RMSFNLPWPDRSCTER	up	TBC1D23_15_up	3	100030677	100030721	1	0.106438	0.1013	0.734878	0.285	37.67	8.97	9.85	-18.02	-22.89
TCF7L2	4	LHFQSGSTHYSAYKTIEHQIAVQ	down	TCF7L2_4_down	10	114724315	114724383	1	-0.287283	-0.2653	-0.145957	-0.215	-31.91	-17.82	-2.62	10.79	-8.9
TPM1	8	GQVRQLEEQLRIMDQTLKALMAAEDK	down	TPM1_8_down	15	63353397	63353472	1	-0.620639	-0.1902	-0.156926	-0.3448	-25.44	-6.6	-8.22	5.51	26.82
TSC2	27	SLRIARPPKQGLNNSPPVKEFKESSAAEAFRCRSISVSEHVVRS	down	TSC2_27_down	16	2127599	2127727	1	-0.243206	-0.2427	-0.156434	-0.2509	-18.41	-19.6	4.82	0.11	-4.53
TTC7A	7	ACLRLLGGTQSRWSEVLQGR	up	TTC7A_7_up	2	47185634	47185691	1	0.400985	0.2125	0.13167	0.0988	19.96	2.41	-0.73	-20.23	-24.3
USO1	12	GDKIDRR	down	USO1_12_down	4	76716489	76716509	1	-0.640798	-0.6439	-0.809614	-0.6218	-61.7	-62.39	-5.28	-1.05	-2.9
USP8	13	PFKIKGQPESGILRTGTFREDTDDTERNK	up	USP8_13_up	15	50776472	50776558	1	0.150773	-0.2712	0.2197	0.1031	13.92	-1.49	-4.19	1.49	-1.83
WDFY3	46	SEIPSKQPETPDDIPQK	up	WDFY3_46_up	4	85648014	85648064	-1	0.269737	0.2948	0.203794	0.2891	25.13	3.91	-5.75	-13.24	-34.81
YAP1	7	AMRNINPSTANSPKCQ	down	YAP1_7_down	11	102080248	102080295	1	-0.207977	-0.2283	-0.143527	-0.1719	9.22	-10.4	-3.64	-15.11	-8.4
ZDHHC7	4	EKSSDCRPSACTVKTGLDPTLVGICGEGTESVQSLLL	up	ZDHHC7_4_up	16	85022369	85022479	-1	0.174594	0.2598	0.289514	0.1577	39.28	0.88	-3.64	-44.81	-22.52

## Sheet: "81" ASE_SFs
gene symbol_exon_reg	% delta PSI (siESRP1&2 vs CTRL)	% deltaPSI (CL vs L)			gene symbol_exon_reg	% delta PSI (siMBNL1&2 vs CTRL)	% deltaPSI (CL vs L)
LRRC14_2_down	-97.73	-0.238736			KIF13A_27_up	-81.09	0.311363
USO1_12_down	-62.39	-0.809614			NUMA1_20_up	-69.28	0.16182
RALGPS2_15_down	-59.51	-0.777482			NFYA_4_up	-44.93	0.683544
SLK_15_down	-55.93	-0.904762			ZDHHC7_4_up	-44.81	0.289514
ARFGAP2_8_down	-45.96	-0.49739			SPAG9_29_up	-43.66	0.576234
FLNB_33_down	-43.36	-0.845354			MADD_17_up	-43.24	0.117983
PDGFA_6_down	-40.12	-0.623188			PLOD2_14_up	-37.13	0.47155
ENAH_12_down	-36.32	-0.746754			CD46_13_up	-34.45	0.435355
NBEAL2_11_down	-29.39	-0.579513			RUBCN_14_up	-34.28	0.362178
CA12_9_down	-28.94	-0.993969			LRRFIP2_20_up	-28.96	0.707663
FNIP1_7_down	-28.24	-0.84592			SNX14_19_up	-25.26	0.203226
MAP3K7_12_down	-27.57	-0.88568			CLSTN1_3_up	-24.36	0.419511
APLP2_8_down	-21.92	-0.287195			TTC7A_7_up	-20.23	0.13167
PCYT2_8_down	-21.58	-0.219874			CLSTN1_11_up	-18.91	0.879538
ESYT2_16_down	-20.37	-0.782145			TBC1D23_15_up	-18.02	0.734878
CD99L2_3_down	-20.1	-0.329738			CSNK1G3_13_up	-17.5	0.43313
TSC2_27_down	-19.6	-0.156434			EXOC7_7_up	-16.51	0.683208
SPTAN1_24_down	-18.91	-0.512375			ST7_15_up	-14.45	0.781305
EXOC1_11_down	-18.59	-0.731719			WDFY3_46_up	-13.24	0.203794
TCF7L2_4_down	-17.82	-0.145957			PHLDB1_23_up	-13.06	0.1875
CCDC57_11_down	-17.64	-0.337533			MYOF_18_up	-11.91	0.741056
NEDD4L_18_down	-16.32	-0.767392			HPS4_11_up	-11.84	0.251429
MBNL1_10_down	-15.57	-0.374578			NHSL1_6_down	10.27	-0.485298
PPP3CB_16_down	-13.76	-0.467728			TCF7L2_4_down	10.79	-0.145957
NFIB_14_down	-12.82	-0.505903			ADD3_16_down	11.2	-0.77643
ROBO1_20_down	-11.58	-0.576918			STX2_10_down	29.93	-0.634286
YAP1_7_down	-10.4	-0.143527			EXOC1_11_down	53.22	-0.731719
KIAA0182_3_up	10.33	0.2878			MBNL1_10_down	56.21	-0.374578
LAS1L_9_up	12.59	0.318635			NUMB_11_down	62.33	-0.549093
SLMAP_24_up	13.34	0.73763
ARHGAP17_17_up	23.72	0.435284
MYOF_18_up	30.9	0.741056			gene symbol_exon_reg	% delta PSI (siRBM9 vs CTRL)	% deltaPSI (CL vs L)
SULF2_20_up	30.96	0.66313			CLSTN1_11_up	-88.81	0.879538
CTNND1_4_up	33.07	0.785206			KIF13A_27_up	-84.19	0.311363
MLPH_10_up	35.78	0.447101			MPRIP_24_up	-82.49	0.319296
EXOC7_7_up	54.87	0.683208			NFYA_4_up	-69.56	0.683544
					MADD_17_up	-65.58	0.117983
gene symbol_exon_reg	% delta PSI (siRBM47 vs CTRL)	% deltaPSI (CL vs L)			NUMA1_20_up	-63.8	0.16182
PDGFA_6_down	-27.05	-0.623188			RAB11FIP3_7_up	-62	0.477926
CA12_9_down	-23.05	-0.993969			ABI1_10_up	-59.78	0.258368
ADD3_16_down	-16.56	-0.77643			LRRFIP2_20_up	-56.19	0.707663
NEDD4L_18_down	-14.11	-0.767392			ST7_15_up	-49.22	0.781305
PPP3CB_16_down	-12.94	-0.467728			FAM126A_11_up	-47.83	0.35396
ESYT2_16_down	-11.79	-0.782145			SPAG9_29_up	-47.61	0.576234
EXOC1_11_down	-11.56	-0.731719			CD46_13_up	-41.83	0.435355
SLK_15_down	-10.15	-0.904762			PLOD2_14_up	-39.55	0.47155
FGFR1_12_down	-9.52	-0.200065			WDFY3_46_up	-34.81	0.203794
TBC1D23_15_up	9.85	0.734878			CLSTN1_3_up	-31.74	0.419511
PLOD2_14_up	10.48	0.47155			SNX14_19_up	-30.74	0.203226
ABI1_10_up	12.53	0.258368			RUBCN_14_up	-29.66	0.362178
FGFR1OP2_5_up	14.71	0.387255			EVI5L_12_up	-24.42	0.151515
					TTC7A_7_up	-24.3	0.13167
					TBC1D23_15_up	-22.89	0.734878
					ZDHHC7_4_up	-22.52	0.289514
					CSNK1G3_13_up	-20.7	0.43313
					SLMAP_24_up	-18.32	0.73763
					PHLDB1_23_up	-14.46	0.1875
					HPS4_11_up	-14.22	0.251429
					FAT1_29_up	-9.17	0.213889
					KIF13A_39_down	10.95	-0.733555
					NHSL1_6_down	11	-0.485298
					ROBO1_20_down	11.29	-0.576918
					PPP3CB_16_down	22.12	-0.467728
					TPM1_8_down	26.82	-0.156926
					NUMB_11_down	36.71	-0.549093
					MAP3K7_12_down	40.89	-0.88568
					STX2_10_down	43.69	-0.634286
					ADD3_16_down	47.5	-0.77643
					EXOC1_11_down	49.78	-0.731719

## Sheet: "Mapping"
Name	Matching status	Gene	Exon	Exon start	Exon end	Matching tag	Exon coverage on input	Input coverage on exon	Exon coding sequence start	Exon coding sequence end	First Coding Exon (FCE)	Constitutive Exon (CE)	Alternatively Spliced Exon (ASE)	Last Coding Exon (LCE)
ABI1_10_up	Single	ABI1	10	27044584	27044670	EE	100	100	27044584	27044670	no	no	yes	no
ADD3_16_down	Single	ADD3	16	111892063	111892158	EE	100	100	111892063	111892158	no	no	yes	no
APLP2_8_down	Single	APLP2	8	129993507	129993674	EE	100	100	129993507	129993674	no	no	yes	no
ARFGAP2_8_down	Single	ARFGAP2	8	47194261	47194302	EE	100	100	47194261	47194302	no	no	yes	no
ARHGAP17_17_up	Single	ARHGAP17	17	24950685	24950918	EE	100	100	24950686	24950918	yes	yes	yes	no
ATP5C1_9_down	Single	ATP5C1	9	7848937	7848973	EE	100	100	7848937	7848943	no	no	yes	no
CA12_9_down	Single	CA12	9	63620297	63620329	EE	100	100	63620297	63620329	no	no	yes	no
CAST_8_up	Single	CAST	8	96062498	96062563	EE	100	100	96062498	96062563	no	no	yes	no
CCDC57_11_down	Single	CCDC57	11	80136903	80137065	EE	100	100	80136903	80137065	no	no	yes	no
CD46_13_up	Single	CD46	13	207963598	207963690	EE	100	100	207963598	207963649	no	no	yes	no
CD99L2_3_down	Single	CD99L2	3	149996779	149998077	EE	100	100			no	no	yes	no
CLSTN1_11_up	Single	CLSTN1	11	9797556	9797612	EE	100	100	9797556	9797612	no	no	yes	no
CLSTN1_3_up	Single	CLSTN1	3	9816539	9816568	EE	100	100	9816539	9816568	no	no	yes	no
CSNK1G3_13_up	Single	CSNK1G3	13	122941033	122941056	EE	100	100	122941033	122941056	no	no	yes	no
CTNND1_4_up	Single	CTNND1	4	57556509	57556627	EE	100	100			no	no	yes	no
DLG1_24_down	Single	DLG1	24	196802708	196802741	EE	100	100	196802708	196802741	no	no	no	no
ENAH_12_down	Single	ENAH	12	225692693	225692755	EE	100	100	225692693	225692755	no	no	yes	no
ESYT2_16_down	Single	ESYT2	16	158545472	158545534	EE	100	100	158545472	158545534	no	no	yes	no
EVI5L_12_up	Single	EVI5L	12	7921865	7922010	EE	100	100	7921978	7922010	no	no	yes	no
EXOC1_11_down	Single	EXOC1	11	56755054	56755098	EE	100	100	56755054	56755098	no	no	yes	no
EXOC7_7_up	Single	EXOC7	7	74087224	74087316	EE	100	100	74087224	74087316	no	no	yes	no
FAM126A_11_up	Single	FAM126A	11	22986571	22986866	EE	100	100	22986598	22986866	no	no	yes	no
FAT1_29_up	Single	FAT1	29	187511522	187511557	EE	100	100			no	no	no	no
FGFR1_12_down	Single	FGFR1	12	38280543	38280693	EE	100	100	38280543	38280693	no	no	no	no
FGFR1OP2_5_up	Single	FGFR1OP2	5	27113448	27113561	EE	100	100	27113448	27113561	no	yes	yes	yes
FLNB_33_down	Single	FLNB	33	58127585	58127656	EE	100	100	58127585	58127656	no	no	yes	no
FNIP1_7_down	Single	FNIP1	7	131046271	131046354	EE	100	100	131046271	131046354	no	no	yes	no
HPS4_11_up	Single	HPS4	11	26862017	26862070	EE	100	100	26862017	26862070	no	no	yes	no
KIAA0182_3_up	Single	KIAA0182	3	85667520	85667738	EE	100	100	85667520	85667738	no	no	yes	no
KIAA0226_14_up	Single	KIAA0226	14	197417945	197418019	EE	100	100	197417945	197418019	no	no	yes	no
KIF13A_27_up	Single	KIF13A	27	17790103	17790141	EE	100	100	17790103	17790141	no	no	yes	no
KIF13A_39_down	Single	KIF13A	39	17771345	17771449	EE	100	100	17771345	17771449	no	yes	yes	yes
LAS1L_9_up	Single	LAS1L	9	64744444	64744494	EE	100	100	64744444	64744494	no	no	yes	no
LRRC14_2_down	Single	LRRC14	2	145744133	145744199	EE	100	100			no	no	yes	no
LRRFIP2_20_up	Single	LRRFIP2	20	37132958	37133029	EE	100	100	37132958	37133029	no	no	yes	no
LSM14B_8_up	Single	LSM14B	8	60705275	60705352	EE	100	100	60705275	60705352	no	no	yes	no
MADD_17_up	Single	MADD	17	47310519	47310578	EE	100	100	47310519	47310578	no	no	yes	no
MAP3K7_12_down	Single	MAP3K7	12	91254271	91254351	EE	100	100	91254271	91254351	no	no	yes	no
MBNL1_10_down	Single	MBNL1	10	152164493	152164546	EE	100	100	152164493	152164546	no	no	yes	no
MINK1_19_down	Single	MINK1	19	4795697	4795807	EE	100	100	4795697	4795807	no	no	yes	no
MLPH_10_up	Single	MLPH	10	238443207	238443290	EE	100	100	238443207	238443290	no	no	yes	no
MPRIP_24_up	Single	MPRIP	24	17083921	17083983	EE	100	100	17083921	17083953	no	no	yes	no
MYOF_18_up	Single	MYOF	18	95152674	95152712	EE	100	100	95152674	95152712	no	no	yes	no
NBEAL2_11_down	Single	NBEAL2	11	47033965	47034045	EE	100	100	47033965	47034045	no	no	yes	no
NEDD4L_18_down	Single	NEDD4L	18	56002710	56002769	EE	100	100	56002710	56002769	no	no	yes	no
NFIB_14_down	Single	NFIB	14	14102416	14102509	EE	100	100	14102417	14102509	no	no	no	no
NFYA_4_up	Single	NFYA	4	41048550	41048636	EE	100	100	41048550	41048636	no	no	yes	no
NHSL1_6_down	Single	NHSL1	6	138763120	138763251	EE	100	100	138763120	138763251	no	no	yes	no
NUMA1_20_up	Single	NUMA1	20	71723447	71723488	EE	100	100	71723447	71723488	no	no	yes	no
NUMB_11_down	Single	NUMB	11	73745989	73746132	EE	100	100	73745989	73746132	no	no	yes	no
PBRM1_32_down	Single	PBRM1	32	52588740	52588895	EE	100	100	52588740	52588895	no	no	no	no
PCYT2_8_down	Single	PCYT2	8	79865080	79865133	EE	100	100	79865080	79865133	no	no	yes	no
PDGFA_6_down	Multiple	PDGFA	6	540068	540136	EE	100	100	540081	540136	no	no	yes	no
PDGFA_6_down	Multiple	AC147651.1	1	539540	540234	PP	100	9.92			no	no	no	no
PHLDB1_23_up	Single	PHLDB1	23	118515365	118515409	EE	100	100	118515365	118515409	no	no	no	no
PLEKHA1_15_up	Single	PLEKHA1	15	124187792	124187936	EE	100	100	124187792	124187896	no	yes	yes	yes
PLOD2_14_up	Single	PLOD2	14	145795649	145795711	EE	100	100	145795649	145795711	no	no	yes	no
PPP3CB_16_down	Single	PPP3CB	16	75199630	75199659	EE	100	100	75199630	75199659	no	no	yes	no
RAB11FIP3_7_up	Single	RAB11FIP3	7	541134	541268	EE	100	100	541134	541268	no	no	yes	no
RAI14_15_down	Single	RAI14	15	34813679	34813765	EE	100	100	34813679	34813765	no	no	yes	no
RALGPS2_15_down	Single	RALGPS2	15	178861365	178861442	EE	100	100	178861365	178861442	no	no	yes	no
ROBO1_20_down	Single	ROBO1	20	78696779	78696805	EE	100	100	78696779	78696805	no	no	yes	no
SEC31A_20_up	Single	SEC31A	20	83782784	83782861	EE	100	100	83782784	83782861	no	no	no	no
SLK_15_down	Single	SLK	15	105770574	105770666	EE	100	100	105770574	105770666	no	no	no	no
SLMAP_24_up	Single	SLMAP	24	57911572	57911661	EE	100	100	57911572	57911655	no	no	yes	no
SMARCC2_29_down	Single	SMARCC2	29	56558087	56558152	EE	100	100	56558087	56558152	no	no	yes	no
SNX14_19_up	Single	SNX14	19	86248556	86248582	EE	100	100	86248556	86248582	no	no	yes	no
SPAG9_29_up	Single	SPAG9	29	49053224	49053262	EE	100	100	49053224	49053262	no	no	yes	no
SPTAN1_24_down	Single	SPTAN1	24	131355262	131355321	EE	100	100	131355262	131355321	yes	yes	yes	no
ST7_15_up	Single	ST7	15	116774178	116774246	EE	100	100	116774178	116774246	no	no	yes	no
STX2_10_down	Single	STX2	10	131280540	131280665	EE	100	100	131280585	131280665	no	no	yes	no
SULF2_20_up	Single	SULF2	20	46288143	46288196	EE	100	100	46288143	46288196	no	no	yes	no
TBC1D23_15_up	Single	TBC1D23	15	100030677	100030721	EE	100	100	100030677	100030721	no	no	yes	no
TCF7L2_4_down	Single	TCF7L2	4	114724315	114724383	EE	100	100	114724315	114724383	no	no	yes	no
TPM1_8_down	Single	TPM1	8	63353397	63353472	EE	100	100	63353397	63353472	no	yes	yes	yes
TSC2_27_down	Single	TSC2	27	2127599	2127727	EE	100	100	2127599	2127727	no	no	yes	no
TTC7A_7_up	Single	TTC7A	7	47185634	47185691	EE	100	100	47185634	47185691	no	no	yes	no
USO1_12_down	Single	USO1	12	76716489	76716509	EE	100	100	76716489	76716509	no	no	yes	no
USP8_13_up	Single	USP8	13	50776472	50776558	EE	100	100	50776472	50776558	no	no	yes	no
WDFY3_46_up	Single	WDFY3	46	85648014	85648064	EE	100	100	85648014	85648064	no	no	yes	no
YAP1_7_down	Single	YAP1	7	102080248	102080295	EE	100	100	102080248	102080295	no	no	yes	no
ZDHHC7_4_up	Single	ZDHHC7	4	85022369	85022479	EE	100	100	85022369	85022479	no	no	yes	no

## Sheet: "Sequences"
Name	Genomic sequence	CDS genomic sequence	CDS peptide sequence
ABI1_10_up	TTTCTATTGCTCCACCCCCTCCCCCTATGCCTCAGTTGACTCCACAGATACCTCTCACAGGCTTCGTGGCCAGGGTGCAGGAAAACA	TTTCTATTGCTCCACCCCCTCCCCCTATGCCTCAGTTGACTCCACAGATACCTCTCACAGGCTTCGTGGCCAGGGTGCAGGAAAACA	ISIAPPPPPMPQLTPQIPLTGFVARVQENI
ADD3_16_down	ATGCTGAGCAGGAATTACTCTCAGATGACGCTTCATCTGTTTCACAAATTCAGTCTCAAACTCAGTCACCGCAAAATGTCCCTGAAAAATTAGAAG	ATGCTGAGCAGGAATTACTCTCAGATGACGCTTCATCTGTTTCACAAATTCAGTCTCAAACTCAGTCACCGCAAAATGTCCCTGAAAAATTAGAAG	DAEQELLSDDASSVSQIQSQTQSPQNVPEKLEE
APLP2_8_down	CTGTCTGCTCCCAGGAGGCGATGACGGGGCCCTGCCGGGCCGTGATGCCTCGTTGGTACTTCGACCTCTCCAAGGGAAAGTGCGTGCGCTTTATATATGGTGGCTGCGGCGGCAACAGGAACAATTTTGAGTCTGAGGATTATTGTATGGCTGTGTGTAAAGCGATGA	CTGTCTGCTCCCAGGAGGCGATGACGGGGCCCTGCCGGGCCGTGATGCCTCGTTGGTACTTCGACCTCTCCAAGGGAAAGTGCGTGCGCTTTATATATGGTGGCTGCGGCGGCAACAGGAACAATTTTGAGTCTGAGGATTATTGTATGGCTGTGTGTAAAGCGATGA	AVCSQEAMTGPCRAVMPRWYFDLSKGKCVRFIYGGCGGNRNNFESEDYCMAVCKAMI
ARFGAP2_8_down	AGTCCGTGTATCTGTCAGCTAAAGGGGCCCTTCCTGCCAGAG	AGTCCGTGTATCTGTCAGCTAAAGGGGCCCTTCCTGCCAGAG	ESVYLSAKGALPARE
ARHGAP17_17_up	CTTTGGTGTGAAGCTTATGGACTTCCAGGCCCACCGGCGGGGTGGCACTCTAAATAGAAAGCACATATCCCCCGCTTTCCAGCCGCCACTTCCGCCCACAGATGGCAGCACCGTGGTGCCCGCTGGCCCAGAGCCCCCTCCCCAGAGCTCTAGGGCTGAAAGCAGCTCTGGGGGTGGGACTGTCCCCTCTTCCGCGGGCATACTGGAGCAGGGGCCGAGCCCAGGCGACGGCAG	CTTTGGTGTGAAGCTTATGGACTTCCAGGCCCACCGGCGGGGTGGCACTCTAAATAGAAAGCACATATCCCCCGCTTTCCAGCCGCCACTTCCGCCCACAGATGGCAGCACCGTGGTGCCCGCTGGCCCAGAGCCCCCTCCCCAGAGCTCTAGGGCTGAAAGCAGCTCTGGGGGTGGGACTGTCCCCTCTTCCGCGGGCATACTGGAGCAGGGGCCGAGCCCAGGCGACGGCA	SFGVKLMDFQAHRRGGTLNRKHISPAFQPPLPPTDGSTVVPAGPEPPPQSSRAESSSGGGTVPSSAGILEQGPSPGDGS
ATP5C1_9_down	GGATTAATGAAAATCAAGTTCCATCCTCAGACAAGAG	GGATTAA	LD
CA12_9_down	TGCAAGTCTGTACTGCGGCAGGACTGAGTCTGG	TGCAAGTCTGTACTGCGGCAGGACTGAGTCTGG	VQVCTAAGLSLG
CAST_8_up	GCCATTCCAGTCAGCCAACAGATGGAAGGACCACATCTTCCTAACAAGAAAAAACACAAAAAACAG	GCCATTCCAGTCAGCCAACAGATGGAAGGACCACATCTTCCTAACAAGAAAAAACACAAAAAACAG	AIPVSQQMEGPHLPNKKKHKKQ
CCDC57_11_down	GTACAAGCAACAGCTGTCCCTGGCAGTGGAAAGGGAGCGGAGCCTGGAGCGTGATCAGGTGCAGCTGGGCCTGGACTGGCAGCGCCGCTGTGATGACATTGAAAGGGACCAGATCCAAAAGTCAGAGGCCCTGATTCAGGGTCTGAGCATGGCAAAAAGTCAG	GTACAAGCAACAGCTGTCCCTGGCAGTGGAAAGGGAGCGGAGCCTGGAGCGTGATCAGGTGCAGCTGGGCCTGGACTGGCAGCGCCGCTGTGATGACATTGAAAGGGACCAGATCCAAAAGTCAGAGGCCCTGATTCAGGGTCTGAGCATGGCAAAAAGTCAG	RYKQQLSLAVERERSLERDQVQLGLDWQRRCDDIERDQIQKSEALIQGLSMAKSQ
CD46_13_up	CACATACCTAACTGATGAGACCCACAGAGAAGTAAAATTTACTTCTCTCTGAGAAGGAGAGATGAGAGAAAGGTTTGCTTTTATCATTAAAAG	CACATACCTAACTGATGAGACCCACAGAGAAGTAAAATTTACTTCTCTCTGA	GTYLTDETHREVKFTSL
CD99L2_3_down	CTGCCTTAGGAATGTACCACAAACTAGATGGCTTAAAACAACAGAACTTTATTCTGTCACTGTTCTGGATGCTAGAAGTTCTATATCAAGGTGTTGGTTGGGCCACATTCTCTCTGAAGGCTCTAGGGAAGAATCTTTCCTTGACTTTCCCCACTTCTGGTGGCTCTAGGTGTTCCTTGGTTTGTGGTTGCATCACTCCAATCTCTGCCTCTGTTGTCACGTGGTGTTCCCCTTTCTGTGTCTCTCTCCTTTCTCTTACAAAGATGCTTGTTAGTGGGTTTAAGGCCCACCTGGATAATCCAGGATGATCTCATCTTGAGATCTTTCACTTAATTACATCTGCAGAGATCCTTTTTCCAAATAAGGAAATATATATTTATAGATATATAATATATATAC…
CLSTN1_11_up	AGTTTTCAGGAGTTGAAAATGACAATGAAACTGAGCCTGTGACTGTGGCCTCTGCAG	AGTTTTCAGGAGTTGAAAATGACAATGAAACTGAGCCTGTGACTGTGGCCTCTGCAG	EFSGVENDNETEPVTVASAG
CLSTN1_3_up	AGAGTTTTGAGGTGACAGTCACCAAAGAAG	AGAGTTTTGAGGTGACAGTCACCAAAGAAG	ESFEVTVTKEG
CSNK1G3_13_up	CTGCCAGAAAGTGTTGAACATGTG	CTGCCAGAAAGTGTTGAACATGTG	NCQKVLNMW
CTNND1_4_up	CTCTCTCCTTCCTGCTTCCTCCTTGCTGTGGTGGCTGGGATGCTTCTTCCATGATTTTTTGAATCTAGACTGGGCTGTTCTCTGTGTTAAACCAATCAGTTGCGACCTTCTCTTAACAG
DLG1_24_down	GAGATCCCTGACGACATGGGATCAAAAGGCCTGA	GAGATCCCTGACGACATGGGATCAAAAGGCCTGA	EIPDDMGSKGLK
ENAH_12_down	ACGGGATTCTCCAAGGAAAAATCAGATTGTTTTTGACAACAGGTCCTATGATTCATTACACAG	ACGGGATTCTCCAAGGAAAAATCAGATTGTTTTTGACAACAGGTCCTATGATTCATTACACAG	RRDSPRKNQIVFDNRSYDSLHR
ESYT2_16_down	AGTAACCCATTAGAATTTAACCCCGATGTCTTGAAGAAGACTGCAGTTCAGAGAGCTTTAAAG	AGTAACCCATTAGAATTTAACCCCGATGTCTTGAAGAAGACTGCAGTTCAGAGAGCTTTAAAG	SNPLEFNPDVLKKTAVQRALK
EVI5L_12_up	AGATAGTCCACTGCGTTAGTGACAAGTGGTTCTTGTCTGTCTCCCCTCTCCTGTCCCCGCGCCTTCCGCTCTGCCTCCTCCCCCTGTCGCTGGGAACCCCCTTCGCCGGGTAGGAGAGCGCTGCTCTGGCTGATAGGTTAATCCAG	GAGAGCGCTGCTCTGGCTGATAGGTTAATCCAG	ESAALADRLIQ
EXOC1_11_down	CTACACTGCCTCGAAAAGAAAGTGCTGTCAAACAGGAAACAGAGA	CTACACTGCCTCGAAAAGAAAGTGCTGTCAAACAGGAAACAGAGA	ATLPRKESAVKQETES
EXOC7_7_up	GGACGATCCGTAAGGCTCAGAACCTTCTGAAACAGTATTCCCAGCATGGTCTAGATGGGAAAAAGGGGGGCTCTAACCTCATTCCTCTGGAAG	GGACGATCCGTAAGGCTCAGAACCTTCTGAAACAGTATTCCCAGCATGGTCTAGATGGGAAAAAGGGGGGCTCTAACCTCATTCCTCTGGAAG	GTIRKAQNLLKQYSQHGLDGKKGGSNLIPLEG
FAM126A_11_up	AGCAACCTGACAACAATAATGATGCTACTGAATTGGGCATCCTTGTCATTCCTGAGATTAGTGTCACAAATGTGGCCGGAGAGAGAACCGGGAATGGGGAAAAAGGCAGAACACTAGGAGAGATTGATGCTCAGCATATACAGGGTGTGCAGGAAACAGCCACAGATCCTAGAACTGAGAGCAAAGGCTTGCCAGAGATCAGGAGGCAAAAATCTGTAAGAAAAATGATGGAGGATGGAATAAACTCACCTGGCAGAGTGCAGTTTTAGCAGAGCACTTTATAACTGCACTCCAAG	AGCAACCTGACAACAATAATGATGCTACTGAATTGGGCATCCTTGTCATTCCTGAGATTAGTGTCACAAATGTGGCCGGAGAGAGAACCGGGAATGGGGAAAAAGGCAGAACACTAGGAGAGATTGATGCTCAGCATATACAGGGTGTGCAGGAAACAGCCACAGATCCTAGAACTGAGAGCAAAGGCTTGCCAGAGATCAGGAGGCAAAAATCTGTAAGAAAAATGATGGAGGATGGAATAAACTCACCTGGCAGAGTGCAGTTTTAG	EQPDNNNDATELGILVIPEISVTNVAGERTGNGEKGRTLGEIDAQHIQGVQETATDPRTESKGLPEIRRQKSVRKMMEDGINSPGRVQF
FAT1_29_up	AATCTTTGGCTGCTCCTGACCTCAGCAAACCAAGAG
FGFR1_12_down	CATTCGGGGATTAATAGCTCGGATGCGGAGGTGCTGACCCTGTTCAATGTGACAGAGGCCCAGAGCGGGGAGTATGTGTGTAAGGTTTCCAATTATATTGGTGAAGCTAACCAGTCTGCGTGGCTCACTGTCACCAGACCTGTGGCAAAAG	CATTCGGGGATTAATAGCTCGGATGCGGAGGTGCTGACCCTGTTCAATGTGACAGAGGCCCAGAGCGGGGAGTATGTGTGTAAGGTTTCCAATTATATTGGTGAAGCTAACCAGTCTGCGTGGCTCACTGTCACCAGACCTGTGGCAAAAG	HSGINSSDAEVLTLFNVTEAQSGEYVCKVSNYIGEANQSAWLTVTRPVAKA
FGFR1OP2_5_up	ATTGACATGGTACATCGTAACAAGTCCGAAGGATTCTTCCTTGATGCATCTCGACACATCCTTGAAGCACCTCAACATGGACTGGAGAGAAGGCACTTGGAAGCAAATCAGAAT	ATTGACATGGTACATCGTAACAAGTCCGAAGGATTCTTCCTTGATGCATCTCGACACATCCTTGAAGCACCTCAACATGGACTGGAGAGAAGGCACTTGGAAGCAAATCAGAAT	IDMVHRNKSEGFFLDASRHILEAPQHGLERRHLEANQN
FLNB_33_down	GCCACAGATGGGGAAGTCACAGCCGTGGAGGAGGCACCGGTAAATGCATGTCCCCCTGGATTCAGGCCCTGG	GCCACAGATGGGGAAGTCACAGCCGTGGAGGAGGCACCGGTAAATGCATGTCCCCCTGGATTCAGGCCCTGG	ATDGEVTAVEEAPVNACPPGFRPW
FNIP1_7_down	GTCTTTCACAGTTCTGCAGCCCCAGGCGGGCATTCTCTGAGCAGGGTCCGCTCCGCCTGATCAGGAGCGCCTCTTTCTTTGCAG	GTCTTTCACAGTTCTGCAGCCCCAGGCGGGCATTCTCTGAGCAGGGTCCGCTCCGCCTGATCAGGAGCGCCTCTTTCTTTGCAG	GLSQFCSPRRAFSEQGPLRLIRSASFFAV
HPS4_11_up	GAAAATGGATGTTATGGAGCTTCAAGAATCGAGTTACCCACCAGAACCCTAATG	GAAAATGGATGTTATGGAGCTTCAAGAATCGAGTTACCCACCAGAACCCTAATG	GKWMLWSFKNRVTHQNPNG
KIAA0182_3_up	GCATGAGCCATGAGCCCAAGTCCCCTTCGCTAGGGATGCTTTCCACCGCGACCAGGACCACCGCCACCGTCAACCCCCTCACCCCCTCGCCGCTCAATGGCGCCCTGGTGCCCAGCGGCAGCCCCGCCACCAGCAGCGCGCTGTCGGCCCAGGCCGCGCCATCCTCCAGCTTTGCCGCCGCGCTGCGCAAGCTCGCCAAACAGGCGGAGGAGCCCAGAG	GCATGAGCCATGAGCCCAAGTCCCCTTCGCTAGGGATGCTTTCCACCGCGACCAGGACCACCGCCACCGTCAACCCCCTCACCCCCTCGCCGCTCAATGGCGCCCTGGTGCCCAGCGGCAGCCCCGCCACCAGCAGCGCGCTGTCGGCCCAGGCCGCGCCATCCTCCAGCTTTGCCGCCGCGCTGCGCAAGCTCGCCAAACAGGCGGAGGAGCCCAGAG	GMSHEPKSPSLGMLSTATRTTATVNPLTPSPLNGALVPSGSPATSSALSAQAAPSSSFAAALRKLAKQAEEPRG
KIAA0226_14_up	ATGGTAGCGAAGGATCTAACCTGACTCACATATCAAAGAACGGACTGTCAGTGTCACTGGCCTCGATGTTCTCAG	ATGGTAGCGAAGGATCTAACCTGACTCACATATCAAAGAACGGACTGTCAGTGTCACTGGCCTCGATGTTCTCAG	DGSEGSNLTHISKNGLSVSLASMFSD
KIF13A_27_up	AGAGATGATGAGGATGGTGATGATATGGATAGTTATCAG	AGAGATGATGAGGATGGTGATGATATGGATAGTTATCAG	RDDEDGDDMDSYQ
KIF13A_39_down	AGCATGCCTCCACCTCAGGCACATAACCCTGGCTGCATTGTACCCTCAGGAAGCAATGGCAGCAGCATGCCAGTAGAACACAATAGCAAACGTGAGAAGAAGATT	AGCATGCCTCCACCTCAGGCACATAACCCTGGCTGCATTGTACCCTCAGGAAGCAATGGCAGCAGCATGCCAGTAGAACACAATAGCAAACGTGAGAAGAAGATT	SMPPPQAHNPGCIVPSGSNGSSMPVEHNNKREKKI
LAS1L_9_up	ATGGTCAGACTGAGGTCCAGAGAGGGGAAGGTACTGACCCAAAGTCACACA	ATGGTCAGACTGAGGTCCAGAGAGGGGAAGGTACTGACCCAAAGTCACACA	DGQTEVQRGEGTDPKSHK
LRRC14_2_down	GGAGATGGCTGCGATTTAGTTTTGAGGATGCTACAGGCAGCAGCAGGGCTGGCACCCTGTGTCACAG
LRRFIP2_20_up	GATATCTATGACCTTAAGGACCAGATACAGGATGTAGAAGGGAGATACATGCAGGGGCTTAAAGAACTAAAG	GATATCTATGACCTTAAGGACCAGATACAGGATGTAGAAGGGAGATACATGCAGGGGCTTAAAGAACTAAAG	DIYDLKDQIQDVEGRYMQGLKELK
LSM14B_8_up	ATGTAGTCCAGCCGGCAGCTGTGCAAGCTCAAGGGCAGGTGAATGACGAGAACAGAAGACCTCAGAGGAGGCGATCAG	ATGTAGTCCAGCCGGCAGCTGTGCAAGCTCAAGGGCAGGTGAATGACGAGAACAGAAGACCTCAGAGGAGGCGATCAG	DVVQPAAVQAQGQVNDENRRPQRRRSG
MADD_17_up	TATTTGGGCTAAATACTCTAATGGAGATTGTTACTGAAGCCGGCCCCGGGAGTGGTGAAG	TATTTGGGCTAAATACTCTAATGGAGATTGTTACTGAAGCCGGCCCCGGGAGTGGTGAAG	VFGLNTLMEIVTEAGPGSGEG
MAP3K7_12_down	CCTATTCCAAGCCTAAACGGGGCCACCGTAAAACTGCTTCATTTGGCAACATTCTGGATGTCCCTGAGATCGTCATATCAG	CCTATTCCAAGCCTAAACGGGGCCACCGTAAAACTGCTTCATTTGGCAACATTCTGGATGTCCCTGAGATCGTCATATCAG	AYSKPKRGHRKTASFGNILDVPEIVISG
MBNL1_10_down	ACTCAGTCGGCTGTCAAATCACTGAAGCGACCCCTCGAGGCAACCTTTGACCTG	ACTCAGTCGGCTGTCAAATCACTGAAGCGACCCCTCGAGGCAACCTTTGACCTG	TQSAVKSLKRPLEATFDL
MINK1_19_down	ACCTCGCAGCAACTCCGCCTGGCAAATCTATCTGCAAAGGCGGGCAGAGCGGGGCACCCCAAAGCCTCCAGGGCCCCCTGCTCAGCCCCCTGGCCCGCCCAACGCCTCTAG	ACCTCGCAGCAACTCCGCCTGGCAAATCTATCTGCAAAGGCGGGCAGAGCGGGGCACCCCAAAGCCTCCAGGGCCCCCTGCTCAGCCCCCTGGCCCGCCCAACGCCTCTAG	RPRSNSAWQIYLQRRAERGTPKPPGPPAQPPGPPNASS
MLPH_10_up	ATCTTTGAGCTGAATAAGCATATTTCAGCTGTGGAATGCCTGCTGACCTACCTGGAGAACACAGTTGTGCCTCCCTTGGCCAAG	ATCTTTGAGCTGAATAAGCATATTTCAGCTGTGGAATGCCTGCTGACCTACCTGGAGAACACAGTTGTGCCTCCCTTGGCCAAG	IFELNKHISAVECLLTYLENTVVPPLAK
MPRIP_24_up	TCCGTAATTGAGCAGGTCTCGTGGGATACCTGAAATGCACCCGCTTCCCGGCCCATGCAGGAG	TCCGTAATTGAGCAGGTCTCGTGGGATACCTGA	SVIEQVSWDT
MYOF_18_up	ATTTCTCATCTTCGGGAACTGGGGCTGCATCATATACAG	ATTTCTCATCTTCGGGAACTGGGGCTGCATCATATACAG	DFSSSGTGAASYTV
NBEAL2_11_down	CTGTACCTGCAGTCCCGGGCGCCCCCCGAGGGGGACAGTGACCTGGCTACCCGGTTACTGACTGAGCCCGATGTCCAAAAG	CTGTACCTGCAGTCCCGGGCGCCCCCCGAGGGGGACAGTGACCTGGCTACCCGGTTACTGACTGAGCCCGATGTCCAAAAG	LYLQSRAPPEGDSDLATRLLTEPDVQK
NEDD4L_18_down	CCCAGTGCCCCAGCTGGGAGAGCGCGTTCATCAACTGTCACGGGTGGTGAGGAACCAACG	CCCAGTGCCCCAGCTGGGAGAGCGCGTTCATCAACTGTCACGGGTGGTGAGGAACCAACG	PSAPAGRARSSTVTGGEEPT
NFIB_14_down	CTGAGGATTTGTGACTGGACCATGAATCAAAACGGCAGGCATTTATACCCCAGTACCAGTGAGGATACATTGGGAATTACTTGGCAAAGGTAAC	CTGAGGATTTGTGACTGGACCATGAATCAAAACGGCAGGCATTTATACCCCAGTACCAGTGAGGATACATTGGGAATTACTTGGCAAAGGTAA	LRICDWTMNQNGRHLYPSTSEDTLGITWQS
NFYA_4_up	CAGCAGGGTGGTGTCACTGCTGTGCAGTTGCAGACTGAGGCCCAGGTGGCATCCGCCTCAGGCCAGCAAGTCCAGACCCTCCAGGTA	CAGCAGGGTGGTGTCACTGCTGTGCAGTTGCAGACTGAGGCCCAGGTGGCATCCGCCTCAGGCCAGCAAGTCCAGACCCTCCAGGTA	QQGGVTAVQLQTEAQVASASGQQVQTLQV
NHSL1_6_down	GGGAGAATTTCGATCGCCAGGCCAGCCTTCGGCGGTCTCTAATTTACACAGACACTCTGGTAAGACGACCGAAGAAAGTCAAAAGGAGAAAGACTATTACAGGAGTCCCTGACAACATACAGAAGGAGCTAG	GGGAGAATTTCGATCGCCAGGCCAGCCTTCGGCGGTCTCTAATTTACACAGACACTCTGGTAAGACGACCGAAGAAAGTCAAAAGGAGAAAGACTATTACAGGAGTCCCTGACAACATACAGAAGGAGCTAG	GENFDRQASLRRSLIYTDTLVRRPKKVKRRKTITGVPDNIQKELA
NUMA1_20_up	GTGGAGCAGCTAGAGGTATTTCAGAGAGAGCAAACTAAGCAG	GTGGAGCAGCTAGAGGTATTTCAGAGAGAGCAAACTAAGCAG	VEQLEVFQREQTKQ
NUMB_11_down	CTAATGGCACTGACTCAGCCTTCCATGTGCTTGCTAAGCCAGCCCATACTGCTCTAGCACCCGTAGCAATGCCTGTGCGTGAAACCAACCCTTGGGCCCATGCCCCTGATGCTGCTAACAAGGAAATTGCAGCCACATGTTCGG	CTAATGGCACTGACTCAGCCTTCCATGTGCTTGCTAAGCCAGCCCATACTGCTCTAGCACCCGTAGCAATGCCTGTGCGTGAAACCAACCCTTGGGCCCATGCCCCTGATGCTGCTAACAAGGAAATTGCAGCCACATGTTCGG	ANGTDSAFHVLAKPAHTALAPVAMPVRETNPWAHAPDAANKEIAATCSG
PBRM1_32_down	GCATGATGGGTGGCTATCCGCCAGGCCTTCCACCTTTGCAGGGCCCAGTTGATGGCCTTGTTAGCATGGGCAGCATGCAGCCACTTCACCCTGGGGGGCCTCCACCCCACCATCTTCCGCCAGGTGTGCCTGGCCTCCCGGGCATCCCACCACCGG	GCATGATGGGTGGCTATCCGCCAGGCCTTCCACCTTTGCAGGGCCCAGTTGATGGCCTTGTTAGCATGGGCAGCATGCAGCCACTTCACCCTGGGGGGCCTCCACCCCACCATCTTCCGCCAGGTGTGCCTGGCCTCCCGGGCATCCCACCACCGG	GMMGGYPPGLPPLQGPVDGLVSMGSMQPLHPGGPPPHHLPPGVPGLPGIPPPG
PCYT2_8_down	CCCCCTCACCCGATACCCGCCGGGGACATACTTTCCTCAGAAGGCTGCTCCCAG	CCCCCTCACCCGATACCCGCCGGGGACATACTTTCCTCAGAAGGCTGCTCCCAG	PPHPIPAGDILSSEGCSQ
PDGFA_6_down	GAAGGCCTAGGGAGTCAGGTAAAAAACGGAAAAGAAAAAGGTTAAAACCCACCTAAAGCAGCCAACCAG	GAAGGCCTAGGGAGTCAGGTAAAAAACGGAAAAGAAAAAGGTTAAAACCCACCTAA	GRPRESGKKRKRKRLKPT
PHLDB1_23_up	TCGAGTCGCTTCCCGCCGAGCCCCTCCCAACCGACGACCCAGCAG	TCGAGTCGCTTCCCGCCGAGCCCCTCCCAACCGACGACCCAGCAG	VESLPAEPLPTDDPAG
PLEKHA1_15_up	ATGCGGCAGGCCAGAAGGCTGTCGAACCCTTGTATACAGAGGTATACATCAAGAGCTGGTGAATGCAGCACGTATGTGGGCTCTCACGCAAACGTGCCTTCTTAGTGGAGGGCCCAGACTTACTACTTACAACTGATCATAGAAA	ATGCGGCAGGCCAGAAGGCTGTCGAACCCTTGTATACAGAGGTATACATCAAGAGCTGGTGAATGCAGCACGTATGTGGGCTCTCACGCAAACGTGCCTTCTTAG	MRQARRLSNPCIQRYTSRAGECSTYVGSHANVPS
PLOD2_14_up	ACTTTACAAAGGGAAAAAGACTCCCCTACTCCGGAAACATTCCAAATGCTCAGCCCCCCAAAG	ACTTTACAAAGGGAAAAAGACTCCCCTACTCCGGAAACATTCCAAATGCTCAGCCCCCCAAAG	TLQREKDSPTPETFQMLSPPK
PPP3CB_16_down	CCACAGTTGAGGCTATTGAGGCTGAAAAAG	CCACAGTTGAGGCTATTGAGGCTGAAAAAG	ATVEAIEAEKA
RAB11FIP3_7_up	CACTGACCCTCTTGCCGCAAAGCTGCACAGCATCCTCACTGATGAGGCGTTTGAGTTTTACTGTAGCCAGTGCCACAAACAAATCAACCGCCTTGAGGATCTTTCTGCCCGCCTGAGTGATCTTGAAATGAATAG	CACTGACCCTCTTGCCGCAAAGCTGCACAGCATCCTCACTGATGAGGCGTTTGAGTTTTACTGTAGCCAGTGCCACAAACAAATCAACCGCCTTGAGGATCTTTCTGCCCGCCTGAGTGATCTTGAAATGAATAG	STDPLAAKLHSILTDEAFEFYCSQCHKQINRLEDLSARLSDLEMNS
RAI14_15_down	CATGACCAAGTCTCTAAAATAAGCTCAGAAAGAAGTGGAACTCCAAAAAAACGCAAAGCTCCACCACCTCCTATCAGTCCTACCCAG	CATGACCAAGTCTCTAAAATAAGCTCAGAAAGAAGTGGAACTCCAAAAAAACGCAAAGCTCCACCACCTCCTATCAGTCCTACCCAG	HDQVSKISSERSGTPKKRKAPPPPISPTQ
RALGPS2_15_down	GAACAGATTATACCATTCTCTCGGCCCGGTGACAAGAGTGGCACGAAATGGCTATCGAAGTCACATGAAGGCCAGCAG	GAACAGATTATACCATTCTCTCGGCCCGGTGACAAGAGTGGCACGAAATGGCTATCGAAGTCACATGAAGGCCAGCAG	RNRLYHSLGPVTRVARNGYRSHMKASS
ROBO1_20_down	TCCCGTCTTTTACCTTCACACCAACAG	TCCCGTCTTTTACCTTCACACCAACAG	VPSFTFTPTV
SEC31A_20_up	GCTCTTAAAGACTCTGACCAAGTAGCACAGAGTGATGGGGAGGAGAGCCCTGCTGCTGAAGAGCAGCTCTTGGGAGAG	GCTCTTAAAGACTCTGACCAAGTAGCACAGAGTGATGGGGAGGAGAGCCCTGCTGCTGAAGAGCAGCTCTTGGGAGAG	ALKDSDQVAQSDGEESPAAEEQLLGE
SLK_15_down	GTTATAAATGAAGTGGAGAAAGCACCCAAAGAGCTGAGAAAAGAGCTCATGAAACGCAGGAAAGAGGAGCTTGCACAAAGCCAGCATGCTCAG	GTTATAAATGAAGTGGAGAAAGCACCCAAAGAGCTGAGAAAAGAGCTCATGAAACGCAGGAAAGAGGAGCTTGCACAAAGCCAGCATGCTCAG	VINEVEKAPKELRKELMKRRKEELAQSQHAQ
SLMAP_24_up	CCTTCCATATTACAACCCGTCCCAGCCGTATTCATCGGCCTATTCCTGGCTTTCCTGTTTTGGTGTTTCGGTCCATTGTGGTAGAGAAAG	CCTTCCATATTACAACCCGTCCCAGCCGTATTCATCGGCCTATTCCTGGCTTTCCTGTTTTGGTGTTTCGGTCCATTGTGGTAG	PSILQPVPAVFIGLFLAFLFWCFGPLW
SMARCC2_29_down	CCCAAAGCCCTGCCATTGTGGCAGCTGTTCAGGGCAACCTCCTGCCCAGTGCCAGCCCACTGCCAG	CCCAAAGCCCTGCCATTGTGGCAGCTGTTCAGGGCAACCTCCTGCCCAGTGCCAGCCCACTGCCAG	AQSPAIVAAVQGNLLPSASPLPD
SNX14_19_up	AGGTAGCCTAAGTTTGGATGATTTTCG	AGGTAGCCTAAGTTTGGATGATTTTCG	RGSLSLDDFR
SPAG9_29_up	CCGTAATCCTCCACCAGGGACGTTTACTGGGGCTGAGGG	CCGTAATCCTCCACCAGGGACGTTTACTGGGGCTGAGGG	TVILHQGRLLGLRA
SPTAN1_24_down	GACACGCATAACTAAGGAGGCCGGCAGTGTATCTCTGCGTATGAAGCAGGTGGAAGAACT	GACACGCATAACTAAGGAGGCCGGCAGTGTATCTCTGCGTATGAAGCAGGTGGAAGAACT	QTRITKEAGSVSLRMKQVEEL
ST7_15_up	AATTAGGTCCAGAGTTGAAGTTCCCCTAATTGCTTCCTCTACCATCTGGGAGATAAAATTGTTACCAAA	AATTAGGTCCAGAGTTGAAGTTCCCCTAATTGCTTCCTCTACCATCTGGGAGATAAAATTGTTACCAAA	EIRSRVEVPLIASSTIWEIKLLPK
STX2_10_down	AAAAAGTGGATAATTATTGCTGTGTCAGTGGTTCTGGTTGCCATAATCGCTCTAATTATTGGCTTGTCAGTTGGCAAATGATGGTGTGGATAACGTCAGTGTGCATGCCTCTCTGCCAGGGTGGGA	AAAAAGTGGATAATTATTGCTGTGTCAGTGGTTCTGGTTGCCATAATCGCTCTAATTATTGGCTTGTCAGTTGGCAAATGA	KKWIIIAVSVVLVAIIALIIGLSVGK
SULF2_20_up	GCAGTTTCAGCGTCGAAAGTGGCCAGAAATGAAGAGACCTTCTTCCAAATCACT	GCAGTTTCAGCGTCGAAAGTGGCCAGAAATGAAGAGACCTTCTTCCAAATCACT	RQFQRRKWPEMKRPSSKSL
TBC1D23_15_up	AATGTCTTTCAATCTTCCTTGGCCAGACAGATCATGTACAGAGCG	AATGTCTTTCAATCTTCCTTGGCCAGACAGATCATGTACAGAGCG	RMSFNLPWPDRSCTER
TCF7L2_4_down	CTCCATTTTCAGTCCGGCAGCACACATTACTCTGCGTACAAAACGATTGAACACCAGATTGCAGTTCAG	CTCCATTTTCAGTCCGGCAGCACACATTACTCTGCGTACAAAACGATTGAACACCAGATTGCAGTTCAG	LHFQSGSTHYSAYKTIEHQIAVQ
TPM1_8_down	CCAAGTCCGACAGCTGGAAGAACAATTAAGAATAATGGATCAGACCTTGAAAGCATTAATGGCTGCAGAGGATAAG	CCAAGTCCGACAGCTGGAAGAACAATTAAGAATAATGGATCAGACCTTGAAAGCATTAATGGCTGCAGAGGATAAG	GQVRQLEEQLRIMDQTLKALMAAEDK
TSC2_27_down	TCTGAGGATAGCCAGACCCCCCAAACAAGGCTTGAATAACTCTCCACCCGTGAAAGAATTCAAGGAGAGCTCTGCAGCCGAGGCCTTCCGGTGCCGCAGCATCAGTGTGTCTGAACATGTGGTCCGCAG	TCTGAGGATAGCCAGACCCCCCAAACAAGGCTTGAATAACTCTCCACCCGTGAAAGAATTCAAGGAGAGCTCTGCAGCCGAGGCCTTCCGGTGCCGCAGCATCAGTGTGTCTGAACATGTGGTCCGCAG	SLRIARPPKQGLNNSPPVKEFKESSAAEAFRCRSISVSEHVVRS
TTC7A_7_up	CATGCCTCCGGCTTCTTGGGGGAACACAGTCCCGGTGGTCAGAGGTCCTGCAGGGGAG	CATGCCTCCGGCTTCTTGGGGGAACACAGTCCCGGTGGTCAGAGGTCCTGCAGGGGAG	ACLRLLGGTQSRWSEVLQGR
USO1_12_down	GGTGATAAGATCGACAGACGG	GGTGATAAGATCGACAGACGG	GDKIDRR
USP8_13_up	CCATTTAAGATTAAAGGACAACCAGAAAGTGGAATTCTAAGGACAGGAACTTTTAGAGAGGATACAGACGATACCGAAAGAAATAAA	CCATTTAAGATTAAAGGACAACCAGAAAGTGGAATTCTAAGGACAGGAACTTTTAGAGAGGATACAGACGATACCGAAAGAAATAAA	PFKIKGQPESGILRTGTFREDTDDTERNK
WDFY3_46_up	TCTGAGATCCCAAGTAAACAGCCTGAGACACCCGATGATATTCCTCAAAAG	TCTGAGATCCCAAGTAAACAGCCTGAGACACCCGATGATATTCCTCAAAAG	SEIPSKQPETPDDIPQK
YAP1_7_down	GCAATGCGGAATATCAATCCCAGCACAGCAAATTCTCCAAAATGTCAG	GCAATGCGGAATATCAATCCCAGCACAGCAAATTCTCCAAAATGTCAG	AMRNINPSTANSPKCQ
ZDHHC7_4_up	GAAAAATCCAGTGACTGCCGACCATCTGCCTGCACAGTGAAAACTGGGCTGGACCCAACCCTTGTGGGCATTTGTGGTGAGGGAACCGAGTCTGTGCAAAGCCTCCTGCTT	GAAAAATCCAGTGACTGCCGACCATCTGCCTGCACAGTGAAAACTGGGCTGGACCCAACCCTTGTGGGCATTTGTGGTGAGGGAACCGAGTCTGTGCAAAGCCTCCTGCTT	EKSSDCRPSACTVKTGLDPTLVGICGEGTESVQSLLL

## Sheet: "Exon annotations"
Name	Number of features	Feature category	Feature identifier	Feature name
ABI1_10_up	4	Binding	EXONT:001885	Protein binding
ABI1_10_up	4	PTM	EXONT:000161	O-phospho-L-serine
ABI1_10_up	4	Structure	EXONT:000024	Compositionally_biased_region_of_peptide
ABI1_10_up	4	Structure	EXONT:000074	Intrinsically_unstructured_polypeptide_region
ADD3_16_down	1	Structure	EXONT:000074	Intrinsically_unstructured_polypeptide_region
APLP2_8_down	4	Catalytic activity	EXONT:003180	Proteinase inhibitor I2, Kunitz metazoa
APLP2_8_down	4	PTM	EXONT:000121	L-cystine (cross-link)
APLP2_8_down	4	PTM	EXONT:000935	Cysteinylation (disulfide with free L-cysteine)
APLP2_8_down	4	Unclassified	EXONT:009139	Proteinase inhibitor I2, Kunitz, conserved site
ARFGAP2_8_down	No functionnal feature
ARHGAP17_17_up	2	PTM	EXONT:000161	O-phospho-L-serine
ARHGAP17_17_up	2	Structure	EXONT:000024	Compositionally_biased_region_of_peptide
ATP5C1_9_down	1	Unclassified	EXONT:009998	ATPase, F1 complex, gamma subunit domain
CA12_9_down	2	Localization	EXONT:000071	Transmembrane_helix
CA12_9_down	2	Structure	EXONT:000071	Transmembrane_helix
CAST_8_up	1	Localization	EXONT:000064	Nuclear_localization_signal
CCDC57_11_down	No functionnal feature
CD46_13_up	2	Localization	EXONT:000064	Nuclear_localization_signal
CD46_13_up	2	PTM	EXONT:000164	O4'-phospho-L-tyrosine
CD99L2_3_down	No functionnal feature
CLSTN1_11_up	3	PTM	EXONT:000992	N4-(N-acetylamino)glucosyl-L-asparagine
CLSTN1_11_up	3	Unclassified	EXONT:002431	Concanavalin A-like lectin/glucanase, subgroup
CLSTN1_11_up	3	Unclassified	EXONT:005423	Concanavalin A-like lectin/glucanases superfamily
CLSTN1_3_up	2	Binding	EXONT:003147	Cadherin
CLSTN1_3_up	2	Binding	EXONT:003148	Cadherin-like
CSNK1G3_13_up	No functionnal feature
CTNND1_4_up	No functionnal feature
DLG1_24_down	5	Binding	EXONT:001885	Protein binding
DLG1_24_down	5	Binding	EXONT:002820	Src homology-3 domain
DLG1_24_down	5	PTM	EXONT:000180	N-acetylated L-lysine
DLG1_24_down	5	PTM	EXONT:000192	N6-acetyl-L-lysine
DLG1_24_down	5	Structure	EXONT:000074	Intrinsically_unstructured_polypeptide_region
ENAH_12_down	3	PTM	EXONT:000161	O-phospho-L-serine
ENAH_12_down	3	PTM	EXONT:000164	O4'-phospho-L-tyrosine
ENAH_12_down	3	Structure	EXONT:000074	Intrinsically_unstructured_polypeptide_region
ESYT2_16_down	1	Binding	EXONT:001886	C2 domain
EVI5L_12_up	No functionnal feature
EXOC1_11_down	3	Binding	EXONT:001885	Protein binding
EXOC1_11_down	3	PTM	EXONT:000162	O-phospho-L-threonine
EXOC1_11_down	3	Structure	EXONT:000074	Intrinsically_unstructured_polypeptide_region
EXOC7_7_up	3	Binding	EXONT:001885	Protein binding
EXOC7_7_up	3	PTM	EXONT:000162	O-phospho-L-threonine
EXOC7_7_up	3	Structure	EXONT:000074	Intrinsically_unstructured_polypeptide_region
FAM126A_11_up	No functionnal feature
FAT1_29_up	No functionnal feature
FGFR1_12_down	5	Binding	EXONT:004886	Immunoglobulin-like domain
FGFR1_12_down	5	Unclassified	EXONT:002625	Immunoglobulin-like fold
FGFR1_12_down	5	Unclassified	EXONT:003679	Immunoglobulin subtype 2
FGFR1_12_down	5	Unclassified	EXONT:004886	Immunoglobulin-like domain
FGFR1_12_down	5	Unclassified	EXONT:006539	Immunoglobulin I-set
FGFR1OP2_5_up	2	Structure	EXONT:000035	Coiled_coil
FGFR1OP2_5_up	2	Structure	EXONT:000074	Intrinsically_unstructured_polypeptide_region
FLNB_33_down	8	Binding	EXONT:001885	Protein binding
FLNB_33_down	8	Binding	EXONT:002729	Filamin/ABP280 repeat
FLNB_33_down	8	Structure	EXONT:000027	Polypeptide_repeat
FLNB_33_down	8	Structure	EXONT:000051	Beta_strand
FLNB_33_down	8	Structure	EXONT:002729	Filamin/ABP280 repeat
FLNB_33_down	8	Structure	EXONT:007959	Filamin/ABP280 repeat-like
FLNB_33_down	8	Unclassified	EXONT:002181	Immunoglobulin E-set
FLNB_33_down	8	Unclassified	EXONT:007959	Filamin/ABP280 repeat-like
FNIP1_7_down	No functionnal feature
HPS4_11_up	No functionnal feature
KIAA0182_3_up	3	PTM	EXONT:000161	O-phospho-L-serine
KIAA0182_3_up	3	Structure	EXONT:000074	Intrinsically_unstructured_polypeptide_region
KIAA0182_3_up	3	Unclassified	EXONT:009443	Genetic suppressor element-like
KIAA0226_14_up	No functionnal feature
KIF13A_27_up	2	Structure	EXONT:000074	Intrinsically_unstructured_polypeptide_region
KIF13A_27_up	2	Unclassified	EXONT:009435	Kinesin-like
KIF13A_39_down	3	Localization	EXONT:000064	Nuclear_localization_signal
KIF13A_39_down	3	Structure	EXONT:000035	Coiled_coil
KIF13A_39_down	3	Structure	EXONT:000074	Intrinsically_unstructured_polypeptide_region
LAS1L_9_up	3	PTM	EXONT:000161	O-phospho-L-serine
LAS1L_9_up	3	PTM	EXONT:000797	Ubiquitinylated lysine
LAS1L_9_up	3	Structure	EXONT:000074	Intrinsically_unstructured_polypeptide_region
LRRC14_2_down	No functionnal feature
LRRFIP2_20_up	3	Binding	EXONT:001885	Protein binding
LRRFIP2_20_up	3	PTM	EXONT:000164	O4'-phospho-L-tyrosine
LRRFIP2_20_up	3	Structure	EXONT:000035	Coiled_coil
LSM14B_8_up	3	Localization	EXONT:000064	Nuclear_localization_signal
LSM14B_8_up	3	PTM	EXONT:000161	O-phospho-L-serine
LSM14B_8_up	3	Structure	EXONT:000074	Intrinsically_unstructured_polypeptide_region
MADD_17_up	1	Structure	EXONT:000074	Intrinsically_unstructured_polypeptide_region
MAP3K7_12_down	5	PTM	EXONT:000161	O-phospho-L-serine
MAP3K7_12_down	5	PTM	EXONT:000162	O-phospho-L-threonine
MAP3K7_12_down	5	PTM	EXONT:000164	O4'-phospho-L-tyrosine
MAP3K7_12_down	5	Structure	EXONT:000037	Peptide_helix
MAP3K7_12_down	5	Structure	EXONT:000074	Intrinsically_unstructured_polypeptide_region
MBNL1_10_down	2	PTM	EXONT:000161	O-phospho-L-serine
MBNL1_10_down	2	PTM	EXONT:000162	O-phospho-L-threonine
MINK1_19_down	4	PTM	EXONT:000161	O-phospho-L-serine
MINK1_19_down	4	PTM	EXONT:000164	O4'-phospho-L-tyrosine
MINK1_19_down	4	Structure	EXONT:000024	Compositionally_biased_region_of_peptide
MINK1_19_down	4	Structure	EXONT:000074	Intrinsically_unstructured_polypeptide_region
MLPH_10_up	No functionnal feature
MPRIP_24_up	3	Binding	EXONT:001885	Protein binding
MPRIP_24_up	3	Binding	EXONT:004898	Identical protein binding
MPRIP_24_up	3	PTM	EXONT:000161	O-phospho-L-serine
MYOF_18_up	1	Binding	EXONT:001886	C2 domain
NBEAL2_11_down	1	Structure	EXONT:000074	Intrinsically_unstructured_polypeptide_region
NEDD4L_18_down	3	PTM	EXONT:000161	O-phospho-L-serine
NEDD4L_18_down	3	PTM	EXONT:000162	O-phospho-L-threonine
NEDD4L_18_down	3	Structure	EXONT:000074	Intrinsically_unstructured_polypeptide_region
NFIB_14_down	No functionnal feature
NFYA_4_up	1	Structure	EXONT:000024	Compositionally_biased_region_of_peptide
NHSL1_6_down	5	Localization	EXONT:000064	Nuclear_localization_signal
NHSL1_6_down	5	PTM	EXONT:000161	O-phospho-L-serine
NHSL1_6_down	5	PTM	EXONT:000162	O-phospho-L-threonine
NHSL1_6_down	5	PTM	EXONT:000164	O4'-phospho-L-tyrosine
NHSL1_6_down	5	Structure	EXONT:000074	Intrinsically_unstructured_polypeptide_region
NUMA1_20_up	2	Localization	EXONT:000067	Nuclear_export_signal
NUMA1_20_up	2	Structure	EXONT:000035	Coiled_coil
NUMB_11_down	1	Structure	EXONT:000074	Intrinsically_unstructured_polypeptide_region
PBRM1_32_down	4	Binding	EXONT:001885	Protein binding
PBRM1_32_down	4	Structure	EXONT:000024	Compositionally_biased_region_of_peptide
PBRM1_32_down	4	Structure	EXONT:000074	Intrinsically_unstructured_polypeptide_region
PBRM1_32_down	4	Unclassified	EXONT:005464	High mobility group box domain
PCYT2_8_down	1	Structure	EXONT:000074	Intrinsically_unstructured_polypeptide_region
PDGFA_6_down	1	Localization	EXONT:000064	Nuclear_localization_signal
PHLDB1_23_up	No functionnal feature
PLEKHA1_15_up	2	PTM	EXONT:000161	O-phospho-L-serine
PLEKHA1_15_up	2	Structure	EXONT:000074	Intrinsically_unstructured_polypeptide_region
PLOD2_14_up	3	PTM	EXONT:000161	O-phospho-L-serine
PLOD2_14_up	3	PTM	EXONT:000162	O-phospho-L-threonine
PLOD2_14_up	3	Structure	EXONT:000074	Intrinsically_unstructured_polypeptide_region
PPP3CB_16_down	No functionnal feature
RAB11FIP3_7_up	No functionnal feature
RAI14_15_down	5	Localization	EXONT:000064	Nuclear_localization_signal
RAI14_15_down	5	PTM	EXONT:000161	O-phospho-L-serine
RAI14_15_down	5	PTM	EXONT:000162	O-phospho-L-threonine
RAI14_15_down	5	PTM	EXONT:000797	Ubiquitinylated lysine
RAI14_15_down	5	Structure	EXONT:000074	Intrinsically_unstructured_polypeptide_region
RALGPS2_15_down	2	PTM	EXONT:000161	O-phospho-L-serine
RALGPS2_15_down	2	PTM	EXONT:000164	O4'-phospho-L-tyrosine
ROBO1_20_down	3	Binding	EXONT:001885	Protein binding
ROBO1_20_down	3	PTM	EXONT:000161	O-phospho-L-serine
ROBO1_20_down	3	PTM	EXONT:000162	O-phospho-L-threonine
SEC31A_20_up	2	PTM	EXONT:000161	O-phospho-L-serine
SEC31A_20_up	2	Structure	EXONT:000074	Intrinsically_unstructured_polypeptide_region
SLK_15_down	3	Localization	EXONT:000064	Nuclear_localization_signal
SLK_15_down	3	Structure	EXONT:000035	Coiled_coil
SLK_15_down	3	Structure	EXONT:000074	Intrinsically_unstructured_polypeptide_region
SLMAP_24_up	2	Localization	EXONT:000071	Transmembrane_helix
SLMAP_24_up	2	Structure	EXONT:000071	Transmembrane_helix
SMARCC2_29_down	No functionnal feature
SNX14_19_up	1	PTM	EXONT:000161	O-phospho-L-serine
SPAG9_29_up	No functionnal feature
SPTAN1_24_down	7	Binding	EXONT:001885	Protein binding
SPTAN1_24_down	7	PTM	EXONT:000161	O-phospho-L-serine
SPTAN1_24_down	7	PTM	EXONT:000162	O-phospho-L-threonine
SPTAN1_24_down	7	PTM	EXONT:000797	Ubiquitinylated lysine
SPTAN1_24_down	7	Structure	EXONT:000027	Polypeptide_repeat
SPTAN1_24_down	7	Structure	EXONT:008149	Spectrin/alpha-actinin
SPTAN1_24_down	7	Unclassified	EXONT:008149	Spectrin/alpha-actinin
ST7_15_up	1	Binding	EXONT:006226	Tetratricopeptide-like helical
STX2_10_down	3	Localization	EXONT:000064	Nuclear_localization_signal
STX2_10_down	3	Localization	EXONT:000071	Transmembrane_helix
STX2_10_down	3	Structure	EXONT:000071	Transmembrane_helix
SULF2_20_up	1	PTM	EXONT:000797	Ubiquitinylated lysine
TBC1D23_15_up	2	Binding	EXONT:001885	Protein binding
TBC1D23_15_up	2	PTM	EXONT:000162	O-phospho-L-threonine
TCF7L2_4_down	2	Binding	EXONT:001885	Protein binding
TCF7L2_4_down	2	Unclassified	EXONT:006740	CTNNB1 binding, N-teminal
TPM1_8_down	3	PTM	EXONT:000180	N-acetylated L-lysine
TPM1_8_down	3	PTM	EXONT:000192	N6-acetyl-L-lysine
TPM1_8_down	3	Structure	EXONT:000074	Intrinsically_unstructured_polypeptide_region
TSC2_27_down	3	Binding	EXONT:001885	Protein binding
TSC2_27_down	3	PTM	EXONT:000161	O-phospho-L-serine
TSC2_27_down	3	Structure	EXONT:000074	Intrinsically_unstructured_polypeptide_region
TTC7A_7_up	No functionnal feature
USO1_12_down	1	Unclassified	EXONT:004828	Vesicle tethering protein Uso1/P115-like , head domain
USP8_13_up	3	PTM	EXONT:000161	O-phospho-L-serine
USP8_13_up	3	PTM	EXONT:000162	O-phospho-L-threonine
USP8_13_up	3	Structure	EXONT:000074	Intrinsically_unstructured_polypeptide_region
WDFY3_46_up	2	Binding	EXONT:001885	Protein binding
WDFY3_46_up	2	Structure	EXONT:000074	Intrinsically_unstructured_polypeptide_region
YAP1_7_down	4	Binding	EXONT:001885	Protein binding
YAP1_7_down	4	PTM	EXONT:000161	O-phospho-L-serine
YAP1_7_down	4	Structure	EXONT:000035	Coiled_coil
YAP1_7_down	4	Structure	EXONT:000074	Intrinsically_unstructured_polypeptide_region
ZDHHC7_4_up	No functionnal feature

## Sheet: "PTM annotations"
Name	Number of features	Feature category	Feature identifier	Feature name	Sequence before feature	Feature sequence	Sequence after feature
ABI1_10_up	1	PTM	EXONT:000161	O-phospho-L-serine	LYSQNSI	S	IAPPPPP
ADD3_16_down	No PTM feature
APLP2_8_down	No PTM feature
ARFGAP2_8_down	No PTM feature
ARHGAP17_17_up	6	PTM	EXONT:000161	O-phospho-L-serine	GPSPGDG	S	PPKPKDP
ARHGAP17_17_up	6	PTM	EXONT:000161	O-phospho-L-serine	SSRAESS	S	GGGTVPS
ARHGAP17_17_up	6	PTM	EXONT:000161	O-phospho-L-serine	PEPPPQS	S	RAESSSG
ARHGAP17_17_up	6	PTM	EXONT:000161	O-phospho-L-serine	SGGGTVP	S	SAGILEQ
ARHGAP17_17_up	6	PTM	EXONT:000161	O-phospho-L-serine	GILEQGP	S	PGDGSPP
ARHGAP17_17_up	6	PTM	EXONT:000161	O-phospho-L-serine	GDLVKKE	S	FGVKLMD
ATP5C1_9_down	No PTM feature
CA12_9_down	No PTM feature
CAST_8_up	No PTM feature
CCDC57_11_down	No PTM feature
CD46_13_up	1	PTM	EXONT:000164	O4'-phospho-L-tyrosine	RRKKKGT	Y	LTDETHR
CD99L2_3_down	No PTM feature
CLSTN1_11_up	No PTM feature
CLSTN1_3_up	No PTM feature
CSNK1G3_13_up	No PTM feature
CTNND1_4_up	No PTM feature
DLG1_24_down	2	PTM	EXONT:000180	N-acetylated L-lysine	IPDDMGS	K	GLKHVTS
DLG1_24_down	2	PTM	EXONT:000192	N6-acetyl-L-lysine	IPDDMGS	K	GLKHVTS
ENAH_12_down	4	PTM	EXONT:000161	O-phospho-L-serine	FDNRSYD	S	LHRPKST
ENAH_12_down	4	PTM	EXONT:000161	O-phospho-L-serine	PVISRRD	S	PRKNQIV
ENAH_12_down	4	PTM	EXONT:000161	O-phospho-L-serine	QIVFDNR	S	YDSLHRP
ENAH_12_down	4	PTM	EXONT:000164	O4'-phospho-L-tyrosine	IVFDNRS	Y	DSLHRPK
ESYT2_16_down	No PTM feature
EVI5L_12_up	No PTM feature
EXOC1_11_down	1	PTM	EXONT:000162	O-phospho-L-threonine	KESKKFA	T	LPRKESA
EXOC7_7_up	1	PTM	EXONT:000162	O-phospho-L-threonine	KPVKRPG	T	IRKAQNL
FAM126A_11_up	No PTM feature
FAT1_29_up	No PTM feature
FGFR1_12_down	No PTM feature
FGFR1OP2_5_up	No PTM feature
FLNB_33_down	No PTM feature
FNIP1_7_down	No PTM feature
HPS4_11_up	No PTM feature
KIAA0182_3_up	2	PTM	EXONT:000161	O-phospho-L-serine	GMSHEPK	S	PSLGMLS
KIAA0182_3_up	2	PTM	EXONT:000161	O-phospho-L-serine	SHEPKSP	S	LGMLSTA
KIAA0226_14_up	No PTM feature
KIF13A_27_up	No PTM feature
KIF13A_39_down	No PTM feature
LAS1L_9_up	2	PTM	EXONT:000161	O-phospho-L-serine	GEGTDPK	S	HKNVDLN
LAS1L_9_up	2	PTM	EXONT:000797	Ubiquitinylated lysine	GTDPKSH	K	NVDLNDV
LRRC14_2_down	No PTM feature
LRRFIP2_20_up	1	PTM	EXONT:000164	O4'-phospho-L-tyrosine	LSELRDI	Y	DLKDQIQ
LSM14B_8_up	1	PTM	EXONT:000161	O-phospho-L-serine	RRPQRRR	S	GNRRTRN
MADD_17_up	No PTM feature
MAP3K7_12_down	4	PTM	EXONT:000161	O-phospho-L-serine	IAATTAY	S	KPKRGHR
MAP3K7_12_down	4	PTM	EXONT:000161	O-phospho-L-serine	RGHRKTA	S	FGNILDV
MAP3K7_12_down	4	PTM	EXONT:000162	O-phospho-L-threonine	PKRGHRK	T	ASFGNIL
MAP3K7_12_down	4	PTM	EXONT:000164	O4'-phospho-L-tyrosine	RIAATTA	Y	SKPKRGH
MBNL1_10_down	2	PTM	EXONT:000161	O-phospho-L-serine	TAAAMTQ	S	AVKSLKR
MBNL1_10_down	2	PTM	EXONT:000162	O-phospho-L-threonine	AATAAAM	T	QSAVKSL
MINK1_19_down	5	PTM	EXONT:000161	O-phospho-L-serine	PPGPPNA	S	SNPDLRR
MINK1_19_down	5	PTM	EXONT:000161	O-phospho-L-serine	PGPPNAS	S	NPDLRRS
MINK1_19_down	5	PTM	EXONT:000161	O-phospho-L-serine	RARPRSN	S	AWQIYLQ
MINK1_19_down	5	PTM	EXONT:000161	O-phospho-L-serine	AVRARPR	S	NSAWQIY
MINK1_19_down	5	PTM	EXONT:000164	O4'-phospho-L-tyrosine	SNSAWQI	Y	LQRRAER
MLPH_10_up	No PTM feature
MPRIP_24_up	1	PTM	EXONT:000161	O-phospho-L-serine	LRNIRSK	S	VIEQVSW
MYOF_18_up	No PTM feature
NBEAL2_11_down	No PTM feature
NEDD4L_18_down	4	PTM	EXONT:000161	O-phospho-L-serine	PAGRARS	S	TVTGGEE
NEDD4L_18_down	4	PTM	EXONT:000161	O-phospho-L-serine	APAGRAR	S	STVTGGE
NEDD4L_18_down	4	PTM	EXONT:000162	O-phospho-L-threonine	RARSSTV	T	GGEEPTP
NEDD4L_18_down	4	PTM	EXONT:000162	O-phospho-L-threonine	AGRARSS	T	VTGGEEP
NFIB_14_down	No PTM feature
NFYA_4_up	No PTM feature
NHSL1_6_down	7	PTM	EXONT:000161	O-phospho-L-serine	ENFDRQA	S	LRRSLIY
NHSL1_6_down	7	PTM	EXONT:000161	O-phospho-L-serine	RQASLRR	S	LIYTDTL
NHSL1_6_down	7	PTM	EXONT:000162	O-phospho-L-threonine	VKRRKTI	T	GVPDNIQ
NHSL1_6_down	7	PTM	EXONT:000162	O-phospho-L-threonine	RSLIYTD	T	LVRRPKK
NHSL1_6_down	7	PTM	EXONT:000162	O-phospho-L-threonine	KKVKRRK	T	ITGVPDN
NHSL1_6_down	7	PTM	EXONT:000162	O-phospho-L-threonine	LRRSLIY	T	DTLVRRP
NHSL1_6_down	7	PTM	EXONT:000164	O4'-phospho-L-tyrosine	SLRRSLI	Y	TDTLVRR
NUMA1_20_up	No PTM feature
NUMB_11_down	No PTM feature
PBRM1_32_down	No PTM feature
PCYT2_8_down	No PTM feature
PDGFA_6_down	No PTM feature
PHLDB1_23_up	No PTM feature
PLEKHA1_15_up	1	PTM	EXONT:000161	O-phospho-L-serine	MRQARRL	S	NPCIQRY
PLOD2_14_up	2	PTM	EXONT:000161	O-phospho-L-serine	TLQREKD	S	PTPETFQ
PLOD2_14_up	2	PTM	EXONT:000162	O-phospho-L-threonine	QREKDSP	T	PETFQML
PPP3CB_16_down	No PTM feature
RAB11FIP3_7_up	No PTM feature
RAI14_15_down	8	PTM	EXONT:000161	O-phospho-L-serine	KAPPPPI	S	PTQLSDV
RAI14_15_down	8	PTM	EXONT:000161	O-phospho-L-serine	DQVSKIS	S	ERSGTPK
RAI14_15_down	8	PTM	EXONT:000161	O-phospho-L-serine	PKQHDQV	S	KISSERS
RAI14_15_down	8	PTM	EXONT:000161	O-phospho-L-serine	HDQVSKI	S	SERSGTP
RAI14_15_down	8	PTM	EXONT:000162	O-phospho-L-threonine	ISSERSG	T	PKKRKAP
RAI14_15_down	8	PTM	EXONT:000162	O-phospho-L-threonine	PPPPISP	T	QLSDVSS
RAI14_15_down	8	PTM	EXONT:000797	Ubiquitinylated lysine	ERSGTPK	K	RKAPPPP
RAI14_15_down	8	PTM	EXONT:000797	Ubiquitinylated lysine	SGTPKKR	K	APPPPIS
RALGPS2_15_down	2	PTM	EXONT:000161	O-phospho-L-serine	ERNRLYH	S	LGPVTRV
RALGPS2_15_down	2	PTM	EXONT:000164	O4'-phospho-L-tyrosine	AFERNRL	Y	HSLGPVT
ROBO1_20_down	3	PTM	EXONT:000161	O-phospho-L-serine	AGIRKVP	S	FTFTPTV
ROBO1_20_down	3	PTM	EXONT:000162	O-phospho-L-threonine	KVPSFTF	T	PTVTYQR
ROBO1_20_down	3	PTM	EXONT:000162	O-phospho-L-threonine	IRKVPSF	T	FTPTVTY
SEC31A_20_up	3	PTM	EXONT:000161	O-phospho-L-serine	ANVALKD	S	DQVAQSD
SEC31A_20_up	3	PTM	EXONT:000161	O-phospho-L-serine	DSDQVAQ	S	DGEESPA
SEC31A_20_up	3	PTM	EXONT:000161	O-phospho-L-serine	AQSDGEE	S	PAAEEQL
SLK_15_down	No PTM feature
SLMAP_24_up	No PTM feature
SMARCC2_29_down	No PTM feature
SNX14_19_up	1	PTM	EXONT:000161	O-phospho-L-serine	KLNRGSL	S	LDDFRNT
SPAG9_29_up	No PTM feature
SPTAN1_24_down	3	PTM	EXONT:000161	O-phospho-L-serine	TKEAGSV	S	LRMKQVE
SPTAN1_24_down	3	PTM	EXONT:000162	O-phospho-L-threonine	QEQIDNQ	T	RITKEAG
SPTAN1_24_down	3	PTM	EXONT:000797	Ubiquitinylated lysine	DNQTRIT	K	EAGSVSL
ST7_15_up	No PTM feature
STX2_10_down	No PTM feature
SULF2_20_up	1	PTM	EXONT:000797	Ubiquitinylated lysine	EMKRPSS	K	SLGQLWE
TBC1D23_15_up	1	PTM	EXONT:000162	O-phospho-L-threonine	PWPDRSC	T	ERHVSSS
TCF7L2_4_down	No PTM feature
TPM1_8_down	2	PTM	EXONT:000180	N-acetylated L-lysine	ALMAAED	K	YSQKEDR
TPM1_8_down	2	PTM	EXONT:000192	N6-acetyl-L-lysine	ALMAAED	K	YSQKEDR
TSC2_27_down	3	PTM	EXONT:000161	O-phospho-L-serine	PKQGLNN	S	PPVKEFK
TSC2_27_down	3	PTM	EXONT:000161	O-phospho-L-serine	AFRCRSI	S	VSEHVVR
TSC2_27_down	3	PTM	EXONT:000161	O-phospho-L-serine	SLNERPK	S	LRIARPP
TTC7A_7_up	No PTM feature
USO1_12_down	No PTM feature
USP8_13_up	2	PTM	EXONT:000161	O-phospho-L-serine	KIKGQPE	S	GILRTGT
USP8_13_up	2	PTM	EXONT:000162	O-phospho-L-threonine	SGILRTG	T	FREDTDD
WDFY3_46_up	No PTM feature
YAP1_7_down	1	PTM	EXONT:000161	O-phospho-L-serine	INPSTAN	S	PKCQELA
ZDHHC7_4_up	No PTM feature

## Sheet: "Functional Features"
Feature identifier	Feature name	Nb regions	EO score		Z-score (.vs ASE)	P-value (vs. ASE)	FDR (vs ASE)		Z-score (.vs CE)	P-value (vs. CE)	FDR (vs C)
EXONT:000001	ROOT	60
EXONT:000152	Phosphorus containing modified residue	28	11.0102		2.26023	0.011904	0.035976		2.51839	0.0058946	0.0188627
EXONT:000153	Phosphorylated residue	28	11.0102		2.26023	0.011904	0.035976		2.51871	0.0058893	0.0188627
EXONT:000154	O-phosphorylated residue	28	11.0102		2.26023	0.011904	0.035976		2.51871	0.0058893	0.0188627
EXONT:000162	O-phospho-L-threonine	12	2.97275		2.25066	0.012204	0.035976		2.34482	0.0095181	0.0253816
EXONT:000161	O-phospho-L-serine	23	6.88137		2.24382	0.012422	0.035976		2.58283	0.0048996	0.0188627
EXONT:000077	Modified L-serine residue	23	6.88137		2.21177	0.013491	0.035976		2.54578	0.0054517	0.0188627
EXONT:000082	Modified L-threonine residue	12	2.97275		2.08924	0.018343	0.0419269		2.25171	0.01217	0.0278171
EXONT:000064	Nuclear_localization_signal	9	3.39244		1.72007	0.04271	0.08542		1.89691	0.02892	0.05784
EXONT:000008	PTM	33	13.5425		1.19979	0.11511	0.20464		1.36199	0.0866	0.13856
EXONT:000034	Polypeptide_structural_motif	6	0.1683		0.963589	0.16763	0.243825		0.700554	0.24179	0.322387
EXONT:000035	Coiled_coil	6	0.1683		0.963589	0.16763	0.243825		0.700554	0.24179	0.322387
EXONT:000074	Intrinsically_unstructured_polypeptide_region	31	2.58011		0.717004	0.23669	0.315587		1.40228	0.080415	0.13856
EXONT:000006	Localization	12	4.0016		0.363433	0.35814	0.40836		0.614765	0.26936	0.33152
EXONT:000164	O4'-phospho-L-tyrosine	7	1.15607		0.234796	0.40718	0.40836		0.356986	0.36055	0.391968
EXONT:000024	Compositionally_biased_region_of_peptide	5	0.187141		0.232255	0.40817	0.40836		0.269607	0.39373	0.39373
EXONT:000163	Modified L-tyrosine residue	7	1.15607		0.231757	0.40836	0.40836		0.338558	0.36747	0.391968
EXONT:000005	Binding	20	0.275054		-3.22947	1	1		-3.91921	1	1
EXONT:000007	Structure	40	3.73451		-2.97722	1	1		-2.81341	1	1
EXONT:000011	Unclassified	11	0.642042		-2.11163	1	1		-2.73325	1	1
EXONT:000021	Polypeptide_secondary_structure	5	0.679748		-3.69106	1	1		-3.58023	1	1
EXONT:000112	Acylated residue	6	1.37627		-0.785344	1	1		-0.826606	1	1
EXONT:000115	N-acylated residue	6	1.37627		-0.75802	1	1		-0.816882	1	1
EXONT:000118	Crosslinked residues	5	1.21112		-0.594758	1	1		-0.684274	1	1
EXONT:000134	Modified L-lysine residue	6	1.37627		-0.765051	1	1		-0.845583	1	1
EXONT:000193	N6-acylated L-lysine	6	1.04597		-0.807184	1	1		-0.894541	1	1
EXONT:001885	Protein binding	19	0.248837		-1.81987	1	1		-2.18939	1	1
EXONT:001886	C2 domain	2	0.0306002
EXONT:001887	Enzyme regulator activity	1	1.12638
EXONT:001888	Enzyme inhibitor activity	1	1.12638
EXONT:001889	Peptidase inhibitor activity	1	1.12638
EXONT:001890	Endopeptidase inhibitor activity	1	1.12638
EXONT:001894	Peptidase activity	1	1.12638
EXONT:001895	Peptidase regulator activity	1	1.12638
EXONT:001896	Endopeptidase regulator activity	1	1.12638
EXONT:001897	Peptidase activity, acting on L-amino acid peptides	1	1.12638
EXONT:001899	Endopeptidase activity	1	1.12638
EXONT:001980	Serine hydrolase activity	1	1.12638
EXONT:001981	Serine-type peptidase activity	1	1.12638
EXONT:002074	Serine-type endopeptidase activity	1	1.12638
EXONT:002101	Calcium ion binding	1	0.0262164
EXONT:002181	Immunoglobulin E-set	1	0.00569492
EXONT:002431	Concanavalin A-like lectin/glucanase, subgroup	1	0.017147
EXONT:002502	Serine-type endopeptidase inhibitor activity	1	1.12638
EXONT:002625	Immunoglobulin-like fold	1	0.149776
EXONT:002729	Filamin/ABP280 repeat	1	0.0069538
EXONT:002820	Src homology-3 domain	1	0.00287222
EXONT:003147	Cadherin	1	0.0130042
EXONT:003148	Cadherin-like	1	0.0262164
EXONT:003180	Proteinase inhibitor I2, Kunitz metazoa	1	1.12638
EXONT:003679	Immunoglobulin subtype 2	1	0.0710784
EXONT:004828	Vesicle tethering protein Uso1/P115-like , head domain	1	0.00395914
EXONT:004886	Immunoglobulin-like domain	1	0.0721541
EXONT:004898	Identical protein binding	1	0.00254081
EXONT:005423	Concanavalin A-like lectin/glucanases superfamily	1	0.0144604
EXONT:005464	High mobility group box domain	1	0.0495115
EXONT:006226	Tetratricopeptide-like helical	1	0.0168076
EXONT:006539	Immunoglobulin I-set	1	0.0764918
EXONT:006740	CTNNB1 binding, N-teminal	1	0.0146661
EXONT:007959	Filamin/ABP280 repeat-like	1	0.030775
EXONT:008149	Spectrin/alpha-actinin	1	0.0168523
EXONT:009139	Proteinase inhibitor I2, Kunitz, conserved site	1	0.165153
EXONT:009435	Kinesin-like	1	0.0183503
EXONT:009443	Genetic suppressor element-like	1	0.007924
EXONT:009998	ATPase, F1 complex, gamma subunit domain	1	0.000202393
EXONT:000002	Catalytic activity	1	1.12638		NA	NA	NA		NA	NA	NA
EXONT:000025	Polypeptide_conserved_region	2	0.119217		NA	NA	NA		NA	NA	NA
EXONT:000027	Polypeptide_repeat	2	0.119217		NA	NA	NA		NA	NA	NA
EXONT:000028	Membrane_structure	3	0.505944		NA	NA	NA		NA	NA	NA
EXONT:000032	Intramembrane_polypeptide_region	3	0.505944		NA	NA	NA		NA	NA	NA
EXONT:000033	Transmembrane_polypeptide_region	3	0.505944		NA	NA	NA		NA	NA	NA
EXONT:000037	Peptide_helix	4	0.632561		NA	NA	NA		NA	NA	NA
EXONT:000051	Beta_strand	1	0.0471865		NA	NA	NA		NA	NA	NA
EXONT:000067	Nuclear_export_signal	1	0.10322		NA	NA	NA		NA	NA	NA
EXONT:000071	Transmembrane_helix	3	0.505944		NA	NA	NA		NA	NA	NA
EXONT:000079	Glycoconjugated residue	1	0.165153		NA	NA	NA		NA	NA	NA
EXONT:000080	Glycosylated residue	1	0.165153		NA	NA	NA		NA	NA	NA
EXONT:000084	N-glycosylated residue	1	0.165153		NA	NA	NA		NA	NA	NA
EXONT:000119	Multisulfide crosslinked residues	1	0.495458		NA	NA	NA		NA	NA	NA
EXONT:000120	Disulfide crosslinked residues	1	0.495458		NA	NA	NA		NA	NA	NA
EXONT:000121	L-cystine (cross-link)	1	0.495458		NA	NA	NA		NA	NA	NA
EXONT:000122	Modified L-cysteine residue	1	0.990917		NA	NA	NA		NA	NA	NA
EXONT:000123	Modified L-asparagine residue	1	0.165153		NA	NA	NA		NA	NA	NA
EXONT:000168	Acetylated residue	2	0.660611		NA	NA	NA		NA	NA	NA
EXONT:000169	N-acetylated residue	2	0.660611		NA	NA	NA		NA	NA	NA
EXONT:000176	Modified glycine residue	4	0.715662		NA	NA	NA		NA	NA	NA
EXONT:000180	N-acetylated L-lysine	2	0.660611		NA	NA	NA		NA	NA	NA
EXONT:000192	N6-acetyl-L-lysine	2	0.330306		NA	NA	NA		NA	NA	NA
EXONT:000291	Sulfur containing modified residue	1	0.495458		NA	NA	NA		NA	NA	NA
EXONT:000292	Thiolated residue	1	0.495458		NA	NA	NA		NA	NA	NA
EXONT:000294	Disulfide conjugated residue	1	0.495458		NA	NA	NA		NA	NA	NA
EXONT:000315	Crosslinked residues with loss of water	4	0.715662		NA	NA	NA		NA	NA	NA
EXONT:000339	Isopeptide crosslinked residues	4	0.715662		NA	NA	NA		NA	NA	NA
EXONT:000340	N6-glycyl-L-lysine	4	0.715662		NA	NA	NA		NA	NA	NA
EXONT:000382	N4-glycosyl-L-asparagine	1	0.165153		NA	NA	NA		NA	NA	NA
EXONT:000394	N-acetylhexosaminylated	1	0.165153		NA	NA	NA		NA	NA	NA
EXONT:000397	N-acetylaminohexosylated residue	1	0.165153		NA	NA	NA		NA	NA	NA
EXONT:000752	N-acetylaminoglucosylated	1	0.165153		NA	NA	NA		NA	NA	NA
EXONT:000753	N-acetylaminoglucosylated residue	1	0.165153		NA	NA	NA		NA	NA	NA
EXONT:000797	Ubiquitinylated lysine	4	0.715662		NA	NA	NA		NA	NA	NA
EXONT:000935	Cysteinylation (disulfide with free L-cysteine)	1	0.495458		NA	NA	NA		NA	NA	NA
EXONT:000991	N4-(N-acetylamino)hexosyl-L-asparagine	1	0.165153		NA	NA	NA		NA	NA	NA
EXONT:000992	N4-(N-acetylamino)glucosyl-L-asparagine	1	0.165153		NA	NA	NA		NA	NA	NA
EXONT:001893	Hydrolase activity	1	1.12638		NA	NA	NA		NA	NA	NA
EXONT:001937	Ion binding	1	0.0262164		NA	NA	NA		NA	NA	NA
EXONT:001938	Cation binding	1	0.0262164		NA	NA	NA		NA	NA	NA
EXONT:001939	Metal ion binding	1	0.0262164		NA	NA	NA		NA	NA	NA

## Sheet: "Protein-Protein Network"
Reduced Network			Protein-Protein network		autophagic factors
ABI1	CRK			ABI1	GRB2 and 14.3.3 proteins					count	p-value	FDR
ABI1	SPTA1			ACTL6A					intracellular non-membrane-bounded organelle	59	2.4e-09	2.4e-07
ABI1	YES1			ADD3					regulation of apoptosis	31	2e-09	1.1e-06
ABI1	CRKL			AKTIP					14-3-3 protein	6	1.6e-09	5.7e-07
ABI1	NCK1			AMOT					kinase	26	1.7e-09	9e-08
ABI1	LCK			APBB1					vesicle	23	2.2e-06	7.3e-05
ABI1	PLCG1			APLP2					autophagic vacuole	6	3.5e-07	1.5e-05
ABI1	SOS1			APP					exocytosis	6	0.0084	0.088
ABI1	BAIAP2			ARHGAP17
ABI1	GRB2			ARID1A
ABI1	PIK3R1			ARID2
ABI1	PIK3R3			ARRB1
ABI1	HSPA8			ARRB2
ABI1	CDK6			ATF2
ADD3	HSPB1			ATF7IP
ADD3	MCM7			ATG5
ADD3	ATXN1			ATP5C1
APLP2	ZNF512B			ATXN1
APLP2	APLP2			BAIAP2
APLP2	ETS1			BECN1
APLP2	APBB1			BTRC
APLP2	NFKB1			C19orf50
APLP2	APP			CBX6
ARHGAP17	AMOT			CD247
ARHGAP17	NF2			CDC5L
ARHGAP17	SLC9A3R1			CDH1
ARHGAP17	ARRB2			CDK6
ATP5C1	EGFR			CDKL3
ATP5C1	CHMP2B			CEP63
ATP5C1	SAV1			CHMP2B
ATP5C1	MYC			CLSTN1
ATP5C1	GABARAPL1			CRK
ATP5C1	VCAM1			CRKL
ATP5C1	EIF2C1			CSNK2A1
ATP5C1	ATF2			CTNNB1
ATP5C1	DPP3			DAXX
CLSTN1	SLK			DISC1
CLSTN1	APBB1			DLG1
CLSTN1	MYC			DPP3
CLSTN1	SETDB1			E2F3
DLG1	MAP3K3			EGFR
DLG1	AMOT			EIF2C1
DLG1	BTRC			ENAH
DLG1	LCK			ESR1
ENAH	SNW1			ESR2
ENAH	BAIAP2			ESYT2
ENAH	CDC5L			ETS1
ENAH	SPTA1			EVI5L
ESYT2	ESYT2			EXOC1
EVI5L	NUDT18			EXOC4
EXOC1	FAM190			EXOC7
EXOC1	SNW1			FAM190
EXOC1	DISC1			FAM40A
EXOC1	EXOC4			FGFR1
EXOC1	MYC			FGFR1OP2
EXOC1	SNAPIN			FLNA
EXOC7	DISC1			FLNB
EXOC7	AKTIP			FNIP1
EXOC7	EXOC4			GABARAP
EXOC7	C19orf50			GABARAPL1
EXOC7	CDC5L			GABARAPL2
EXOC7	DPP3			GOLGA2
EXOC7	SNW1			GRB2
FGFR1	PLCG1			HDAC1
FGFR1	CDH1			HDAC2
FGFR1	PKM2			HPS4
FGFR1	ATG5			HSP90AB1
FGFR1	CRK			HSPA8
FGFR1	CTNNB1			HSPB1
FGFR1	PIK3R1			IKBKE
FGFR1	HSP90AB1			IKBKG
FGFR1	SOS1			KIAA0182
FGFR1	FGFR1			RUBCN
FGFR1OP2	SIKE1			KIF13A
FGFR1OP2	STK3			LAS1L
FGFR1OP2	PDCD10			LCK
FGFR1OP2	STK4			LRRFIP2
FGFR1OP2	MOBKL3			MADD
FGFR1OP2	FAM40A			MAP1LC3A
FGFR1OP2	STK25			MAP1LC3B
FGFR1OP2	STRN3			MAP3K3
FGFR1OP2	ZRANB1			MAP3K7
FGFR1OP2	STRN			MAPK6
FGFR1OP2	RASSF3			MAPK8
FGFR1OP2	STK24			MBNL1
FLNB	ESR1			MCM7
FLNB	FLNA			MED28
FLNB	MAPK8			MINK1
FLNB	PSEN1			MLH1
FLNB	MAP1LC3B			MOBKL3
FLNB	GRB2			MPRIP
FLNB	GABARAPL1			MYC
FLNB	ATF7IP			MYOF
FLNB	HSPB1			NCK1
FLNB	RAC1			NEDD4L
FLNB	PIK3R1			NF2
FLNB	PLCG1			NFKB1
FLNB	MLH1			NFYA
FLNB	VCAM1			NUDT18
FLNB	CD247			NUMA1
FLNB	ESR2			NUMB
FLNB	FLNB			PBRM1
FLNB	CRK			PCYT2
FLNB	NCK1			PDCD10
FNIP1	PTPN13			PDGFA
FNIP1	YWHAB			PIK3R1
FNIP1	SCHIP1			PIK3R3
HPS4	RAC1			PKM2
KIAA0182	GOLGA2			PLCG1
KIAA0182	KIAA0182			PLEKHA1
KIAA0182	HDAC1			PLOD2
KIAA0182	RALBP1			PPP1CA
KIAA0182	CDC5L			PPP3CB
KIAA0182	NUDT18			PSEN1
KIAA0182	XRCC6			PTPN13
KIAA0182	BECN1			PYHIN1
KIAA0182	HDAC2			RAB11FIP3
KIAA0182	CEP63			RAC1
RUBCN	EGFR			RACGAP1
RUBCN	BECN1			RAI14
KIF13A	ATF7IP			RALBP1
KIF13A	NCK1			RALGPS2
KIF13A	PIK3R1			RAPGEF2
KIF13A	GRB2			RASSF3
LAS1L	PYHIN1			RIPK3
LAS1L	ETS1			ROBO1
LAS1L	MYC			RUVBL2
LAS1L	CBX6			SAV1
LAS1L	CDC5L			SCHIP1
LAS1L	ESR2			SEC31A
LAS1L	EIF2C1			SETDB1
LRRFIP2	CD247			SIKE1
LRRFIP2	GRB2			SLC9A3R1
MADD	WNK1			SLK
MADD	YWHAZ			SMARCA4
MAP3K7	IKBKG			SMARCD1
MAP3K7	TAB1			SNAPIN
MAP3K7	STAT3			SNW1
MAP3K7	AKTIP			SOS1
MAP3K7	CDKL3			SPAG9
MAP3K7	MAP3K7			SPTA1
MAP3K7	MAPK6			STAT3
MAP3K7	TAB2			STK24
MAP3K7	RUVBL2			STK25
MAP3K7	MAPK8			STK3
MAP3K7	MYC			STK4
MAP3K7	ARRB2			STRN
MAP3K7	HSPA8			STRN3
MAP3K7	HSP90AB1			TAB1
MAP3K7	FLNA			TAB2
MAP3K7	UBC			TCF7L2
MAP3K7	TUBB4			TNNT1
MBNL1	VCAM1			TPM1
MINK1	HSP90AB1			TSC2
MPRIP	MAP3K3			TTC7A
MPRIP	RIPK3			TUBB4
MPRIP	YWHAQ			UBC
MPRIP	CD247			USP8
MPRIP	YWHAG			VCAM1
MPRIP	YWHAZ			WDFY3
MPRIP	IKBKG			WNK1
MPRIP	MPRIP			XRCC6
MPRIP	YWHAB			YES1
MPRIP	RACGAP1			YWHAB
MPRIP	GRB2			YWHAE
MPRIP	ARRB1			YWHAG
MYOF	YWHAZ			YWHAH
NEDD4L	YWHAG			YWHAQ
NEDD4L	UBC			YWHAZ
NEDD4L	YWHAH			ZNF512B
NEDD4L	RAPGEF2			ZRANB1
NEDD4L	WNK1
NEDD4L	YWHAZ
NEDD4L	AMOT
NEDD4L	MED28
NFYA	PKM2
NFYA	CSNK2A1
NUMA1	CDK6
NUMA1	HSP90AB1
NUMA1	CBX6
NUMA1	E2F3
NUMA1	PYHIN1
NUMA1	ESR1
NUMA1	YWHAZ
NUMB	EGFR
NUMB	RALBP1
NUMB	APP
PBRM1	ESR2
PBRM1	ARID2
PBRM1	ZNF512B
PBRM1	SCHIP1
PBRM1	SMARCA4
PBRM1	ACTL6A
PBRM1	SNW1
PBRM1	SMARCD1
PCYT2	SETDB1
PDGFA	PDGFA
PLEKHA1	PTPN13
PLEKHA1	CRKL
PLOD2	RUVBL2
PLOD2	ATG5
PLOD2	MYC
PPP3CB	GRB2
PPP3CB	GABARAPL2
RAB11FIP3	RACGAP1
RAI14	GRB2
RAI14	YWHAB
RAI14	YWHAG
RAI14	YWHAQ
RAI14	YWHAZ
RAI14	RIPK3
RAI14	MAP3K3
RALGPS2	YWHAB
RALGPS2	YWHAZ
RALGPS2	YWHAG
ROBO1	TUBB4
ROBO1	ROBO1
SEC31A	TNNT1
SEC31A	VCAM1
SLK	SLK
SLK	GABARAP
SLK	IKBKE
SPAG9	MAP1LC3B
SPAG9	NFKB1
SPAG9	EXOC4
SPAG9	SPAG9
TCF7L2	PSEN1
TCF7L2	DAXX
TCF7L2	CTNNB1
TCF7L2	XRCC6
TCF7L2	E2F3
TPM1	GOLGA2
TPM1	TNNT1
TPM1	SNAPIN
TPM1	YWHAZ
TPM1	CD247
TPM1	RIPK3
TPM1	ATF2
TPM1	C19orf50
TPM1	GRB2
TSC2	YWHAE
TSC2	YWHAZ
TSC2	YWHAQ
TSC2	YWHAH
TSC2	GRB2
TSC2	YWHAB
TSC2	YWHAG
TSC2	PPP1CA
TTC7A	MCM7
USP8	YWHAH
USP8	YWHAZ
USP8	CHMP2B
USP8	YWHAG
USP8	YWHAB
USP8	YWHAQ
WDFY3	PIK3R3
WDFY3	GABARAP
WDFY3	ATG5
WDFY3	GRB2
WDFY3	GABARAPL1
WDFY3	STAT3
WDFY3	MAP1LC3B
WDFY3	MYC
WDFY3	ATXN1
WDFY3	GABARAPL2
CD247	HSP90AB1
NCK1	SOS1
DAXX	HSPB1
YWHAE	DISC1
HSP90AB1	GABARAPL1
HSPB1	SMARCD1
STK3	YWHAB
TAB2	HSPA8
NFKB1	GABARAPL2
STAT3	HDAC1
CDC5L	STK24
ATXN1	WNK1
NFKB1	MAP1LC3B
YWHAB	MYC
ARRB2	YWHAH
CDKL3	GOLGA2
CDK6	MYC
PPP1CA	WNK1
MAP1LC3A	HSP90AB1
YWHAE	YWHAG
EGFR	YES1
HSPB1	YWHAE
YWHAH	YWHAG
EGFR	BAIAP2
ESR1	SMARCD1
GABARAPL2	HSP90AB1
LCK	HSP90AB1
YWHAB	GABARAPL1
EXOC4	ATG5
TUBB4	IKBKG
IKBKG	HSPA8
MAP1LC3A	HSPB1
STK25	GOLGA2
STAT3	EGFR
VCAM1	YES1
EGFR	GABARAPL2
SNW1	MLH1
CDH1	HDAC2
PPP1CA	GRB2
YWHAB	CSNK2A1
BAIAP2	YWHAH
HSP90AB1	SETDB1
ATF2	MAPK8
MOBKL3	STK3
SNW1	GOLGA2
SNW1	PPP1CA
RUVBL2	STRN3
EIF2C1	UBC
WNK1	YWHAZ
EGFR	ESR1
CTNNB1	ESR2
HSP90AB1	YWHAB
STRN3	STK4
BECN1	ATG5
EGFR	MAP3K3
CDC5L	CDC5L
NCK1	PIK3R3
STK25	IKBKG
RIPK3	YWHAE
GRB2	EGFR
RUVBL2	ESR1
STK25	STRN
PIK3R1	CRK
CDKL3	MOBKL3
RASSF3	SAV1
UBC	RALBP1
YES1	SLC9A3R1
GABARAPL2	HSPA8
SOS1	CRKL
ARRB1	EGFR
YWHAB	YWHAH
YWHAE	YWHAH
CDC5L	RUVBL2
ATF2	CTNNB1
RUVBL2	EIF2C1
CDKL3	STRN
CSNK2A1	HSP90AB1
ARRB2	CSNK2A1
FAM190	MAP1LC3B
CDK6	CDKL3
GABARAPL2	XRCC6
CDKL3	STRN3
UBC	LCK
GABARAPL1	HSPB1
MED28	LCK
RAC1	MAPK8
DAXX	HDAC2
GABARAPL1	CDKL3
YWHAB	HSPB1
RUVBL2	VCAM1
ESR2	HSPA8
YES1	HSP90AB1
PKM2	STK25
APP	EGFR
MAP1LC3B	STK4
CDC5L	GABARAPL1
HDAC1	CDC5L
IKBKG	IKBKG
MAPK6	HSP90AB1
MAP1LC3B	RASSF3
HSPA8	IKBKE
GRB2	RACGAP1
XRCC6	ETS1
MAPK8	CDKL3
HDAC1	DAXX
FLNA	PSEN1
MYC	HDAC2
YWHAE	ARRB2
GABARAPL2	GABARAP
CTNNB1	EGFR
MAPK8	HSPA8
NFKB1	CTNNB1
MOBKL3	EGFR
YWHAB	RACGAP1
STK3	GABARAP
XRCC6	SNW1
HDAC2	ACTL6A
PIK3R1	EGFR
MAP3K3	IKBKG
TAB1	ARRB2
MOBKL3	RAPGEF2
YWHAG	YWHAG
GABARAPL1	HSPA8
TAB1	TUBB4
PIK3R3	STAT3
ESR1	PIK3R1
GRB2	TAB1
PKM2	MAP1LC3B
YWHAB	YWHAZ
STK4	CTNNB1
HDAC2	ESR1
RUVBL2	TAB2
UBC	YWHAG
CDKL3	SIKE1
C19orf50	CEP63
EGFR	IKBKG
YWHAQ	ARRB1
NFKB1	YWHAQ
VCAM1	YWHAG
STK4	MCM7
ESR1	FLNA
PIK3R1	FLNA
EGFR	PKM2
ARRB2	ARRB1
PKM2	MYC
PIK3R3	EGFR
GABARAPL2	HSPB1
HDAC1	HDAC2
PIK3R1	STAT3
FAM40A	RASSF3
CDKL3	SCHIP1
FLNA	PLCG1
HSP90AB1	HSPB1
BAIAP2	BAIAP2
CDKL3	IKBKG
MAP1LC3A	STK4
EIF2C1	CRK
VCAM1	SMARCA4
HSP90AB1	RIPK3
STK3	GABARAPL2
SNW1	ARID1A
MYC	CDKL3
CTNNB1	CDH1
VCAM1	RAC1
YWHAZ	ATF2
IKBKG	UBC
ESR2	ESR2
GABARAPL2	SMARCA4
STRN	ZRANB1
HSP90AB1	TAB1
ESR2	ESR1
GABARAPL1	STK3
EGFR	MAPK8
TAB2	BECN1
YWHAZ	GABARAPL2
PKM2	GRB2
EGFR	CRKL
CTNNB1	ETS1
ARRB2	EGFR
STK4	STK4
MAPK8	CRK
ESR1	CTNNB1
SIKE1	STK24
RIPK3	FLNA
STK4	STK3
STK4	PKM2
PIK3R3	CRK
GRB2	YWHAG
ESR2	RUVBL2
CDC5L	RACGAP1
RASSF3	GABARAP
HSP90AB1	GRB2
MOBKL3	STK25
MYC	PPP1CA
HSPA8	ARRB1
YWHAG	SMARCD1
MAP1LC3A	EIF2C1
ATF2	ATF2
UBC	TAB1
PTPN13	PDCD10
MCM7	CTNNB1
ATXN1	YWHAZ
MCM7	HSP90AB1
RUVBL2	MYC
TNNT1	HSP90AB1
MAP1LC3A	CSNK2A1
VCAM1	CDKL3
EIF2C1	GABARAPL1
YWHAE	YWHAZ
STK4	HSPB1
FAM40A	MOBKL3
SETDB1	MOBKL3
TAB2	TAB2
FAM40A	STK24
GABARAPL2	YWHAE
TUBB4	RIPK3
CTNNB1	E2F3
SIKE1	PDCD10
EIF2C1	XRCC6
MOBKL3	STRN
RIPK3	RIPK3
YWHAQ	YWHAZ
HSPB1	SNW1
HSPA8	MYC
ZNF512B	ESR2
MOBKL3	PDCD10
HSPB1	YWHAZ
EGFR	TAB1
HSPA8	ESR1
MCM7	VCAM1
CRK	SOS1
GABARAP	XRCC6
EIF2C1	EIF2C1
SMARCA4	SNW1
ATF2	MLH1
SMARCA4	YWHAZ
MAPK8	PIK3R1
HSPB1	MYC
RACGAP1	YWHAG
EGFR	APBB1
SIKE1	SIKE1
RUVBL2	GABARAPL1
BTRC	CTNNB1
HSPA8	VCAM1
YWHAB	UBC
SLK	GABARAP
YWHAE	TAB2
RAPGEF2	YWHAZ
YWHAZ	CDC5L
PKM2	IKBKE
CRKL	PIK3R1
YWHAB	GRB2
STRN	PDCD10
STK3	STRN3
STRN3	FAM40A
SIKE1	STRN3
CD247	CD247
CDK6	HSP90AB1
ESR1	HDAC1
CDC5L	HSP90AB1
YWHAG	YWHAB
SNW1	HSP90AB1
GABARAP	CDKL3
TUBB4	ARRB2
MAP3K3	YWHAE
MAP3K3	TUBB4
MAP1LC3A	NFKB1
TUBB4	GABARAP
SOS1	PLCG1
YWHAH	HSPB1
HSP90AB1	GABARAP
YWHAE	YWHAE
SETDB1	HDAC1
PKM2	GABARAPL2
VCAM1	HSP90AB1
SNAPIN	YWHAE
IKBKG	RALBP1
EGFR	PLCG1
FLNA	TAB2
YWHAQ	YWHAE
YWHAZ	UBC
BECN1	EGFR
EGFR	EGFR
MAP1LC3B	GABARAP
MCM7	GOLGA2
GABARAP	HSPA8
IKBKG	LCK
PIK3R1	LCK
BAIAP2	YWHAB
SCHIP1	NF2
HSPB1	GRB2
PLCG1	PIK3R1
YWHAE	SAV1
MAP1LC3A	RUVBL2
RUVBL2	YWHAZ
PSEN1	APP
FLNA	HSP90AB1
PSEN1	CTNNB1
CTNNB1	CDK6
PIK3R1	CTNNB1
MCM7	GABARAPL2
APP	ARRB1
MED28	YES1
GABARAPL2	EIF2C1
MAP3K3	YWHAZ
MAP1LC3A	GRB2
ZRANB1	UBC
PTPN13	STK25
ARRB2	ARRB2
ESR1	ESR1
YWHAG	MAP3K3
BECN1	EXOC4
HSPA8	APP
SAV1	STK4
HSPB1	HSPB1
ACTL6A	SNW1
CDH1	CDH1
FLNA	GABARAPL1
YWHAG	ARRB1
SNAPIN	YWHAZ
SNW1	RUVBL2
SCHIP1	STRN
HDAC1	HDAC1
SMARCA4	CDC5L
MCM7	IKBKG
C19orf50	GABARAPL1
FAM40A	CDKL3
C19orf50	MAP1LC3A
PYHIN1	YWHAG
GRB2	RUVBL2
ATF7IP	DISC1
CDKL3	STK24
MLH1	GABARAP
CDC5L	GOLGA2
FAM40A	STK3
GRB2	PIK3R1
HSPA8	YWHAQ
YWHAZ	TAB2
MAP1LC3B	STK3
MAP3K3	FLNA
MAP1LC3A	MAP1LC3A
STRN	RASSF3
MOBKL3	STRN3
CD247	LCK
STK4	HSPA8
TAB2	UBC
YWHAQ	YWHAH
YWHAB	YWHAB
BTRC	BTRC
VCAM1	YWHAZ
ESR2	FLNA
PDCD10	STK24
SLC9A3R1	NF2
STAT3	STAT3
IKBKG	FLNA
GABARAPL1	CRKL
ARRB1	PKM2
MAP1LC3B	CTNNB1
BECN1	YES1
STRN	STK24
MAPK8	CRKL
MAP1LC3A	STK3
C19orf50	MAP1LC3B
GRB2	CRK
AMOT	SAV1
GABARAPL1	GABARAP
HSPB1	VCAM1
ESR1	PPP1CA
XRCC6	E2F3
MCM7	MYC
YWHAZ	BAIAP2
YWHAH	YWHAH
SMARCA4	ACTL6A
DAXX	UBC
HSPA8	ARRB2
MAP1LC3B	MAP1LC3A
YWHAG	WNK1
ATG5	GABARAPL1
MYC	IKBKG
EGFR	CDH1
IKBKG	TAB2
PPP1CA	MAP3K3
ESR1	NFKB1
YWHAE	VCAM1
YWHAQ	EGFR
YWHAB	EGFR
VCAM1	XRCC6
NF2	MED28
ETS1	NFKB1
UBC	UBC
STRN3	PDCD10
YWHAZ	ARRB1
GRB2	YWHAE
STK4	XRCC6
RAC1	BAIAP2
YWHAZ	HSP90AB1
ATXN1	CRK
CEP63	DISC1
YWHAE	ATXN1
STK24	STRN3
ACTL6A	CDC5L
FAM40A	STK4
VCAM1	PKM2
ESR1	GOLGA2
C19orf50	NUDT18
CDC5L	SNW1
IKBKE	IKBKE
MCM7	EGFR
MOBKL3	ZRANB1
STK4	STAT3
YWHAG	PIK3R1
WNK1	YWHAE
YWHAB	VCAM1
SNW1	MAPK6
RASSF3	STRN3
GABARAPL1	STK4
MAP3K3	PKM2
SAV1	YWHAH
RASSF3	STK3
ARRB2	XRCC6
TUBB4	ESR2
STK4	RASSF3
HDAC1	SNW1
YWHAQ	HSPB1
YWHAQ	GABARAP
MCM7	SNW1
MYC	HDAC1
PIK3R1	YWHAZ
CDKL3	RACGAP1
CRK	EGFR
HDAC2	STAT3
GABARAPL1	PKM2
TUBB4	TAB2
PKM2	ATF2
APP	APBB1
TNNT1	TNNT1
HSPA8	YWHAH
XRCC6	GABARAPL1
PIK3R1	MED28
CDH1	PPP1CA
SIKE1	RASSF3
ATF2	YWHAB
GABARAP	MAP1LC3A
YWHAE	MYC
MAP1LC3B	XRCC6
ARRB2	YWHAB
GOLGA2	DAXX
SIKE1	FAM40A
SNW1	SMARCD1
PIK3R1	PIK3R1
HSP90AB1	IKBKG
AMOT	CTNNB1
EGFR	HSPB1
IKBKE	HDAC2
ARRB2	FLNA
ESR1	ZNF512B
SMARCA4	ARID2
STK25	FAM40A
IKBKE	RUVBL2
LCK	STAT3
GRB2	APP
ZNF512B	XRCC6
ZNF512B	YES1
HSPA8	MAP1LC3A
EXOC4	SNW1
ATF2	YWHAG
CSNK2A1	HDAC1
IKBKG	YWHAZ
CDC5L	GABARAP
YWHAQ	MYC
IKBKE	UBC
PPP1CA	ESR2
STRN	STK4
HSPA8	GRB2
ATF2	HSP90AB1
RIPK3	HSPA8
YWHAZ	YWHAG
STK25	STK25
HSP90AB1	MAP3K3
MYC	UBC
SAV1	YWHAZ
YWHAG	ARRB2
PDCD10	STK25
ARID1A	SMARCA4
HDAC2	CSNK2A1
IKBKE	HSP90AB1
RASSF3	RASSF3
HSPB1	CDC5L
CDC5L	PPP1CA
XRCC6	YWHAZ
STRN3	ZRANB1
SIKE1	STK25
EGFR	NCK1
SMARCA4	SMARCD1
CD247	ARRB1
YWHAB	YWHAE
VCAM1	PPP1CA
CTNNB1	STRN3
YWHAZ	APP
HSP90AB1	MAP1LC3B
GABARAPL2	ATG5
CDC5L	SMARCD1
GRB2	IKBKE
GRB2	SMARCD1
YES1	ARRB1
ZNF512B	HDAC1
ETS1	CDC5L
GABARAPL1	YWHAZ
ESR1	HSP90AB1
HSP90AB1	ARRB2
PTPN13	YWHAB
RUVBL2	ACTL6A
YWHAH	YWHAZ
TUBB4	IKBKE
ESR1	SNW1
GRB2	YWHAQ
YWHAH	GRB2
GRB2	PLCG1
CD247	MCM7
SNW1	HSPA8
CDH1	PSEN1
RIPK3	RUVBL2
GABARAPL1	YWHAE
SMARCA4	SMARCA4
PIK3R3	GRB2
MAP1LC3B	HSPB1
MED28	GRB2
FLNA	MYC
YWHAZ	GABARAP
GABARAPL1	GABARAPL1
SOS1	GRB2
HSPA8	EGFR
AMOT	NF2
SLK	IKBKE
CTNNB1	YWHAZ
SMARCA4	HDAC2
GABARAP	STK4
YWHAZ	ESR1
YWHAZ	DISC1
MAP3K3	YWHAH
FLNA	CRK
PIK3R1	RAC1
PKM2	YWHAZ
DAXX	STAT3
PKM2	HSP90AB1
STAT3	NFKB1
STK25	STRN3
GABARAPL2	STK4
SMARCA4	HDAC1
ACTL6A	MYC
CDKL3	STK25
APP	APP
GABARAPL2	GABARAPL2
YES1	CTNNB1
RAC1	PLCG1
CDC5L	GABARAPL2
TAB1	TAB2
YWHAQ	DISC1
STK3	STRN
GRB2	XRCC6
XRCC6	MYC
GABARAP	ATG5
ESR2	CDC5L
YWHAE	EGFR
RUVBL2	MAP1LC3B
RASSF3	MOBKL3
RACGAP1	SNW1
GABARAPL2	MAP1LC3A
STAT3	PPP1CA
VCAM1	VCAM1
TAB1	TAB1
PYHIN1	DAXX
MAP3K3	MAP3K3
YWHAG	BAIAP2
GABARAPL2	MAP1LC3B
VCAM1	PDCD10
PDCD10	FAM40A
GRB2	FLNA
ARID1A	SMARCD1
YWHAQ	ARRB2
PLCG1	PLCG1
HDAC2	CDC5L
PPP1CA	CRK
FLNA	YWHAZ
GRB2	YWHAZ
GABARAPL2	GABARAPL1
AMOT	AMOT
CDC5L	HSPA8
HDAC1	NFKB1
ZRANB1	FAM40A
RUVBL2	MAP3K3
CRKL	VCAM1
RUVBL2	RUVBL2
FLNA	VCAM1
YWHAZ	YWHAZ
MAP3K3	YWHAB
FLNA	ARRB1
YWHAE	ARRB1
ARRB1	YWHAB
HSPA8	TAB1
HSP90AB1	EGFR
MAP1LC3B	ATG5
MYC	EXOC4
YWHAE	CDC5L
MCM7	PPP1CA
BTRC	HSP90AB1
LCK	LCK
MCM7	MCM7
GRB2	GRB2
DAXX	ETS1
NFKB1	NFKB1
EXOC4	CDC5L
APBB1	ATXN1
MYC	SMARCA4
NCK1	CD247
WNK1	WNK1
PYHIN1	YWHAH
CDC5L	DISC1
CSNK2A1	XRCC6
HSPA8	MAP3K3
YWHAB	YWHAQ
SCHIP1	SCHIP1
CTNNB1	HDAC1
HSP90AB1	HSP90AB1
ARID1A	CDC5L
HDAC2	ARRB2
YWHAQ	MAP3K3
STRN	SIKE1
GRB2	UBC
ARRB1	CSNK2A1
YWHAZ	EGFR
PIK3R1	SOS1
MOBKL3	STK4
ARRB2	PKM2
ARRB1	ARRB1
STAT3	CDC5L
PSEN1	PSEN1
FLNA	FLNA
ATF2	HSPB1
XRCC6	PYHIN1
YWHAZ	STK25
IKBKE	SMARCA4
NF2	NF2
PKM2	MAP1LC3A
ATG5	ATG5
SAV1	STK3
GABARAP	GABARAP
STRN	FAM40A
DAXX	DAXX
STK3	STK3
YWHAZ	HSPA8
SNW1	HDAC2
STK25	STK24
CDC5L	YWHAG
MOBKL3	STK24
HSPB1	SMARCA4
TNNT1	SNW1
YWHAB	WNK1
HSP90AB1	EIF2C1
HSPA8	MAP1LC3B
YWHAG	STK4
HSPA8	DPP3
HSP90AB1	NFKB1
RAC1	UBC
BECN1	BECN1
STRN3	STRN
GABARAP	YWHAE
PDCD10	CDKL3
MOBKL3	SIKE1
GRB2	VCAM1
ACTL6A	SMARCD1
SNW1	SNW1
ATXN1	CDK6
SAV1	SAV1
ARRB1	YWHAH
MAP1LC3B	MAP1LC3B
SMARCA4	ESR1
ATXN1	ATXN1
STRN3	STRN3
